# Supplementary material for: Ex-situ avian sex skews: determinants and implications for conservation
Source: PeerJ. 2025 Apr 18;13:e19312. doi: 10.7717/peerj.19312 (PMC12011015; doi:10.7717/peerj.19312)
Supplement: Supplemental Information 3 [file peerj-13-19312-s003.xlsx]

## Sheet: Struthi
Sort	Family	Scientific Name	Common Name	Geographical Region	Country	Held within range Y/N	Held within range Y/N		Range	Male	Female	Other	Births	Group Male	Group Female	Group Other	Total Count	TOTAL KNOWN MALE	TOTAL KNOWN FEMALE	REVISED TOTAL	RATIO	Proportion (Male)
20	Struthionidae	Struthio camelus	Common ostrich	Africa	Egypt	TRUE	TRUE	Algeria	Africa,Arabia,south Syria	1	2	6	6	0	0	0	9	1	2	3	0.5:1	0.333333
21	Struthionidae	Struthio camelus	Common ostrich	Africa	Mauritius	FALSE	FALSE	Angola	Africa,Arabia,south Syria	0	0	3	0	6	13	0	22	6	13	19	0.5:1	0.315789
23	Struthionidae	Struthio camelus	Common ostrich	Africa	South Africa	TRUE	TRUE	Botswana	Africa,Arabia,south Syria	0	1	0	0	0	0	0	1	0	1	1	0:1	0
24	Struthionidae	Struthio camelus	Common ostrich	Africa	South Africa	TRUE	TRUE	Burkina Faso	Africa,Arabia,south Syria	1	0	0	0	0	0	0	1	1	0	1	#DIV/0!	1
25	Struthionidae	Struthio camelus	Common ostrich	Asia	Armenia	FALSE	FALSE	Cameroon	Africa,Arabia,south Syria	1	1	0	0	0	0	0	2	1	1	2	1:1	0.5
26	Struthionidae	Struthio camelus	Common ostrich	Asia	India	FALSE	FALSE	Central Aftican Republic	Africa,Arabia,south Syria	2	1	0	0	0	0	0	3	2	1	3	2:1	0.666667
27	Struthionidae	Struthio camelus	Common ostrich	Asia	India	FALSE	FALSE	Chad	Africa,Arabia,south Syria	0	0	0	0	0	1	0	1	0	1	1	0:1	0
28	Struthionidae	Struthio camelus	Common ostrich	Asia	India	FALSE	FALSE	Djibouti	Africa,Arabia,south Syria	4	3	0	0	0	0	0	7	4	3	7	1.3:1	0.571429
29	Struthionidae	Struthio camelus	Common ostrich	Asia	India	FALSE	FALSE	Egypt	Africa,Arabia,south Syria	2	2	0	0	0	0	0	4	2	2	4	1:1	0.5
30	Struthionidae	Struthio camelus	Common ostrich	Asia	India	FALSE	FALSE	Eritrea	Africa,Arabia,south Syria	2	2	0	0	0	0	0	4	2	2	4	1:1	0.5
31	Struthionidae	Struthio camelus	Common ostrich	Asia	Indonesia	FALSE	FALSE	Ethiopia	Africa,Arabia,south Syria	4	2	0	0	0	0	0	6	4	2	6	2:1	0.666667
32	Struthionidae	Struthio camelus	Common ostrich	Asia	Israel	FALSE	FALSE	Kenya	Africa,Arabia,south Syria	0	2	0	0	0	0	0	2	0	2	2	0:1	0
33	Struthionidae	Struthio camelus	Common ostrich	Asia	Japan	FALSE	FALSE	Mali	Africa,Arabia,south Syria	1	0	0	0	0	0	0	1	1	0	1	#DIV/0!	1
34	Struthionidae	Struthio camelus	Common ostrich	Asia	Japan	FALSE	FALSE	Mauritania	Africa,Arabia,south Syria	0	1	0	0	0	0	0	1	0	1	1	0:1	0
35	Struthionidae	Struthio camelus	Common ostrich	Asia	Japan	FALSE	FALSE	Mozambique	Africa,Arabia,south Syria	0	0	0	0	0	2	0	2	0	2	2	0:1	0
36	Struthionidae	Struthio camelus	Common ostrich	Asia	Japan	FALSE	FALSE	Namibia	Africa,Arabia,south Syria	1	2	0	0	0	0	0	3	1	2	3	0.5:1	0.333333
37	Struthionidae	Struthio camelus	Common ostrich	Asia	Japan	FALSE	FALSE	Niger	Africa,Arabia,south Syria	0	4	0	0	0	0	0	4	0	4	4	0:1	0
38	Struthionidae	Struthio camelus	Common ostrich	Asia	Kazakhstan	FALSE	FALSE	Nigeria	Africa,Arabia,south Syria	1	0	0	0	0	0	0	1	1	0	1	#DIV/0!	1
40	Struthionidae	Struthio camelus	Common ostrich	Asia	Singapore	FALSE	FALSE	Senegal	Africa,Arabia,south Syria	0	1	0	0	0	0	0	1	0	1	1	0:1	0
41	Struthionidae	Struthio camelus	Common ostrich	Asia	Sri Lanka	FALSE	FALSE	South Africa	Africa,Arabia,south Syria	5	5	0	1	0	0	0	10	5	5	10	1:1	0.5
42	Struthionidae	Struthio camelus	Common ostrich	Asia	Taiwan	FALSE	FALSE	South Sudan	Africa,Arabia,south Syria	1	1	0	0	0	0	0	2	1	1	2	1:1	0.5
43	Struthionidae	Struthio camelus	Common ostrich	Asia	Thailand	FALSE	FALSE	Sudan	Africa,Arabia,south Syria	1	0	0	0	2	0	0	3	3	0	3	#DIV/0!	1
44	Struthionidae	Struthio camelus	Common ostrich	Asia	Thailand	FALSE	FALSE	Tanzania	Africa,Arabia,south Syria	0	0	0	0	0	4	6	10	0	4	4	0:1	0
45	Struthionidae	Struthio camelus	Common ostrich	Asia	Thailand	FALSE	FALSE	United Republic of	Africa,Arabia,south Syria	0	2	0	0	0	0	5	7	0	2	2	0:1	0
46	Struthionidae	Struthio camelus	Common ostrich	Asia	Thailand	FALSE	FALSE	Uganda	Africa,Arabia,south Syria	0	2	0	0	0	0	1	3	0	2	2	0:1	0
47	Struthionidae	Struthio camelus	Common ostrich	Asia	Thailand	FALSE	FALSE	Zambia	Africa,Arabia,south Syria	1	0	0	0	0	0	0	1	1	0	1	#DIV/0!	1
48	Struthionidae	Struthio camelus	Common ostrich	Asia	Thailand	FALSE	FALSE	Zimbabwe	Africa,Arabia,south Syria	1	3	15	8	0	0	0	19	1	3	4	0.3:1	0.25
49	Struthionidae	Struthio camelus	Common ostrich	Asia	Turkey	FALSE	FALSE	Somalia	Africa,Arabia,south Syria	0	2	0	0	0	0	0	2	0	2	2	0:1	0
50	Struthionidae	Struthio camelus	Common ostrich	Asia	Turkey	FALSE	FALSE		Africa,Arabia,south Syria	1	5	0	0	0	0	0	6	1	5	6	0.2:1	0.166667
51	Struthionidae	Struthio camelus	Common ostrich	Asia	Turkey	FALSE	FALSE		Africa,Arabia,south Syria	0	0	0	0	2	1	3	6	2	1	3	2:1	0.666667
52	Struthionidae	Struthio camelus	Common ostrich	Asia	United Arab Emirates	FALSE	FALSE		Africa,Arabia,south Syria	1	1	0	0	0	0	0	2	1	1	2	1:1	0.5
53	Struthionidae	Struthio camelus	Common ostrich	Asia	United Arab Emirates	FALSE	FALSE		Africa,Arabia,south Syria	4	3	0	0	0	0	0	7	4	3	7	1.3:1	0.571429
54	Struthionidae	Struthio camelus	Common ostrich	Asia	United Arab Emirates	FALSE	FALSE		Africa,Arabia,south Syria	2	7	12	0	0	0	0	21	2	7	9	0.3:1	0.222222
55	Struthionidae	Struthio camelus	Common ostrich	Asia	United Arab Emirates	FALSE	FALSE		Africa,Arabia,south Syria	2	2	2	0	0	0	0	6	2	2	4	1:1	0.5
56	Struthionidae	Struthio camelus	Common ostrich	Asia	Uzbekistan	FALSE	FALSE		Africa,Arabia,south Syria	2	4	2	0	0	0	0	8	2	4	6	0.5:1	0.333333
57	Struthionidae	Struthio camelus	Common ostrich	Asia	Viet Nam	FALSE	FALSE		Africa,Arabia,south Syria	2	3	4	0	0	0	0	9	2	3	5	0.7:1	0.4
58	Struthionidae	Struthio camelus	Common ostrich	Australia (Oceania)	Australia	FALSE	FALSE		Africa,Arabia,south Syria	3	3	5	0	0	0	0	11	3	3	6	1:1	0.5
59	Struthionidae	Struthio camelus	Common ostrich	Australia (Oceania)	Australia	FALSE	FALSE		Africa,Arabia,south Syria	3	7	0	0	0	0	0	10	3	7	10	0.4:1	0.3
60	Struthionidae	Struthio camelus	Common ostrich	Australia (Oceania)	Australia	FALSE	FALSE		Africa,Arabia,south Syria	1	0	0	0	0	0	0	1	1	0	1	#DIV/0!	1
61	Struthionidae	Struthio camelus	Common ostrich	Australia (Oceania)	Australia	FALSE	FALSE		Africa,Arabia,south Syria	3	4	0	0	0	0	0	7	3	4	7	0.8:1	0.428571
62	Struthionidae	Struthio camelus	Common ostrich	Australia (Oceania)	Australia	FALSE	FALSE		Africa,Arabia,south Syria	13	13	0	0	0	0	0	26	13	13	26	1:1	0.5
63	Struthionidae	Struthio camelus	Common ostrich	Australia (Oceania)	Australia	FALSE	FALSE		Africa,Arabia,south Syria	0	1	0	0	0	0	0	1	0	1	1	0:1	0
64	Struthionidae	Struthio camelus	Common ostrich	Australia (Oceania)	Australia	FALSE	FALSE		Africa,Arabia,south Syria	4	6	0	0	0	0	0	10	4	6	10	0.7:1	0.4
65	Struthionidae	Struthio camelus	Common ostrich	Australia (Oceania)	New Caledonia	FALSE	FALSE		Africa,Arabia,south Syria	1	0	0	0	0	0	0	1	1	0	1	#DIV/0!	1
66	Struthionidae	Struthio camelus	Common ostrich	Australia (Oceania)	New Zealand	FALSE	FALSE		Africa,Arabia,south Syria	0	4	0	0	0	0	0	4	0	4	4	0:1	0
67	Struthionidae	Struthio camelus	Common ostrich	Australia (Oceania)	New Zealand	FALSE	FALSE		Africa,Arabia,south Syria	0	5	0	0	0	0	0	5	0	5	5	0:1	0
68	Struthionidae	Struthio camelus	Common ostrich	Australia (Oceania)	New Zealand	FALSE	FALSE		Africa,Arabia,south Syria	0	3	0	0	0	0	0	3	0	3	3	0:1	0
69	Struthionidae	Struthio camelus	Common ostrich	Europe	Belarus	FALSE	FALSE		Africa,Arabia,south Syria	0	1	0	0	0	0	0	1	0	1	1	0:1	0
70	Struthionidae	Struthio camelus	Common ostrich	Europe	Belarus	FALSE	FALSE		Africa,Arabia,south Syria	1	0	0	0	0	0	0	1	1	0	1	#DIV/0!	1
71	Struthionidae	Struthio camelus	Common ostrich	Europe	Belgium	FALSE	FALSE		Africa,Arabia,south Syria	3	2	0	0	0	0	0	5	3	2	5	1.5:1	0.6
72	Struthionidae	Struthio camelus	Common ostrich	Europe	Belgium	FALSE	FALSE		Africa,Arabia,south Syria	1	1	0	0	0	0	0	2	1	1	2	1:1	0.5
73	Struthionidae	Struthio camelus	Common ostrich	Europe	Belgium	FALSE	FALSE		Africa,Arabia,south Syria	0	2	0	0	0	0	0	2	0	2	2	0:1	0
74	Struthionidae	Struthio camelus	Common ostrich	Europe	Bulgaria	FALSE	FALSE		Africa,Arabia,south Syria	1	1	0	0	0	0	0	2	1	1	2	1:1	0.5
75	Struthionidae	Struthio camelus	Common ostrich	Europe	Croatia	FALSE	FALSE		Africa,Arabia,south Syria	1	2	0	0	0	0	0	3	1	2	3	0.5:1	0.333333
76	Struthionidae	Struthio camelus	Common ostrich	Europe	Croatia	FALSE	FALSE		Africa,Arabia,south Syria	1	0	0	0	0	0	0	1	1	0	1	#DIV/0!	1
77	Struthionidae	Struthio camelus	Common ostrich	Europe	Croatia	FALSE	FALSE		Africa,Arabia,south Syria	1	2	0	0	0	0	0	3	1	2	3	0.5:1	0.333333
78	Struthionidae	Struthio camelus	Common ostrich	Europe	Czech Republic	FALSE	FALSE		Africa,Arabia,south Syria	1	1	0	0	0	0	0	2	1	1	2	1:1	0.5
79	Struthionidae	Struthio camelus	Common ostrich	Europe	Czech Republic	FALSE	FALSE		Africa,Arabia,south Syria	1	4	0	0	0	0	0	5	1	4	5	0.3:1	0.2
80	Struthionidae	Struthio camelus	Common ostrich	Europe	Czech Republic	FALSE	FALSE		Africa,Arabia,south Syria	1	2	0	0	0	0	0	3	1	2	3	0.5:1	0.333333
81	Struthionidae	Struthio camelus	Common ostrich	Europe	Czech Republic	FALSE	FALSE		Africa,Arabia,south Syria	1	1	0	0	0	0	0	2	1	1	2	1:1	0.5
82	Struthionidae	Struthio camelus	Common ostrich	Europe	Czech Republic	FALSE	FALSE		Africa,Arabia,south Syria	0	2	0	0	0	0	0	2	0	2	2	0:1	0
83	Struthionidae	Struthio camelus	Common ostrich	Europe	Czech Republic	FALSE	FALSE		Africa,Arabia,south Syria	1	1	0	0	0	0	0	2	1	1	2	1:1	0.5
84	Struthionidae	Struthio camelus	Common ostrich	Europe	Czech Republic	FALSE	FALSE		Africa,Arabia,south Syria	0	3	0	0	0	0	0	3	0	3	3	0:1	0
85	Struthionidae	Struthio camelus	Common ostrich	Europe	Denmark	FALSE	FALSE		Africa,Arabia,south Syria	1	2	0	0	0	0	0	3	1	2	3	0.5:1	0.333333
86	Struthionidae	Struthio camelus	Common ostrich	Europe	Denmark	FALSE	FALSE		Africa,Arabia,south Syria	0	3	0	0	0	0	0	3	0	3	3	0:1	0
87	Struthionidae	Struthio camelus	Common ostrich	Europe	Denmark	FALSE	FALSE		Africa,Arabia,south Syria	1	2	0	0	0	0	0	3	1	2	3	0.5:1	0.333333
88	Struthionidae	Struthio camelus	Common ostrich	Europe	Denmark	FALSE	FALSE		Africa,Arabia,south Syria	2	0	0	0	0	0	0	2	2	0	2	#DIV/0!	1
89	Struthionidae	Struthio camelus	Common ostrich	Europe	Denmark	FALSE	FALSE		Africa,Arabia,south Syria	1	3	4	0	0	0	0	8	1	3	4	0.3:1	0.25
90	Struthionidae	Struthio camelus	Common ostrich	Europe	Denmark	FALSE	FALSE		Africa,Arabia,south Syria	3	2	0	0	0	0	0	5	3	2	5	1.5:1	0.6
91	Struthionidae	Struthio camelus	Common ostrich	Europe	Denmark	FALSE	FALSE		Africa,Arabia,south Syria	1	1	0	0	0	0	0	2	1	1	2	1:1	0.5
92	Struthionidae	Struthio camelus	Common ostrich	Europe	Denmark	FALSE	FALSE		Africa,Arabia,south Syria	1	1	0	0	0	0	0	2	1	1	2	1:1	0.5
93	Struthionidae	Struthio camelus	Common ostrich	Europe	Denmark	FALSE	FALSE		Africa,Arabia,south Syria	1	3	0	0	0	0	0	4	1	3	4	0.3:1	0.25
94	Struthionidae	Struthio camelus	Common ostrich	Europe	France	FALSE	FALSE		Africa,Arabia,south Syria	0	2	0	0	0	0	0	2	0	2	2	0:1	0
95	Struthionidae	Struthio camelus	Common ostrich	Europe	France	FALSE	FALSE		Africa,Arabia,south Syria	1	1	0	0	0	0	0	2	1	1	2	1:1	0.5
96	Struthionidae	Struthio camelus	Common ostrich	Europe	France	FALSE	FALSE		Africa,Arabia,south Syria	0	3	0	0	0	0	0	3	0	3	3	0:1	0
97	Struthionidae	Struthio camelus	Common ostrich	Europe	France	FALSE	FALSE		Africa,Arabia,south Syria	1	0	0	0	0	0	0	1	1	0	1	#DIV/0!	1
98	Struthionidae	Struthio camelus	Common ostrich	Europe	France	FALSE	FALSE		Africa,Arabia,south Syria	0	3	0	0	0	0	0	3	0	3	3	0:1	0
99	Struthionidae	Struthio camelus	Common ostrich	Europe	France	FALSE	FALSE		Africa,Arabia,south Syria	0	2	0	0	0	0	0	2	0	2	2	0:1	0
100	Struthionidae	Struthio camelus	Common ostrich	Europe	France	FALSE	FALSE		Africa,Arabia,south Syria	1	3	0	0	0	0	0	4	1	3	4	0.3:1	0.25
101	Struthionidae	Struthio camelus	Common ostrich	Europe	France	FALSE	FALSE		Africa,Arabia,south Syria	1	1	0	0	0	0	0	2	1	1	2	1:1	0.5
102	Struthionidae	Struthio camelus	Common ostrich	Europe	France	FALSE	FALSE		Africa,Arabia,south Syria	0	6	0	0	0	0	0	6	0	6	6	0:1	0
103	Struthionidae	Struthio camelus	Common ostrich	Europe	France	FALSE	FALSE		Africa,Arabia,south Syria	2	3	0	0	0	0	0	5	2	3	5	0.7:1	0.4
104	Struthionidae	Struthio camelus	Common ostrich	Europe	France	FALSE	FALSE		Africa,Arabia,south Syria	1	6	0	0	0	0	0	7	1	6	7	0.2:1	0.142857
106	Struthionidae	Struthio camelus	Common ostrich	Europe	France	FALSE	FALSE		Africa,Arabia,south Syria	0	3	0	0	0	0	0	3	0	3	3	0:1	0
107	Struthionidae	Struthio camelus	Common ostrich	Europe	France	FALSE	FALSE		Africa,Arabia,south Syria	2	4	0	0	0	0	0	6	2	4	6	0.5:1	0.333333
108	Struthionidae	Struthio camelus	Common ostrich	Europe	France	FALSE	FALSE		Africa,Arabia,south Syria	0	11	0	0	0	0	0	11	0	11	11	0:1	0
109	Struthionidae	Struthio camelus	Common ostrich	Europe	France	FALSE	FALSE		Africa,Arabia,south Syria	1	2	0	0	0	0	0	3	1	2	3	0.5:1	0.333333
110	Struthionidae	Struthio camelus	Common ostrich	Europe	France	FALSE	FALSE		Africa,Arabia,south Syria	0	2	0	0	0	0	0	2	0	2	2	0:1	0
111	Struthionidae	Struthio camelus	Common ostrich	Europe	France	FALSE	FALSE		Africa,Arabia,south Syria	1	0	2	0	0	0	0	3	1	0	1	#DIV/0!	1
112	Struthionidae	Struthio camelus	Common ostrich	Europe	France	FALSE	FALSE		Africa,Arabia,south Syria	2	2	0	0	0	0	0	4	2	2	4	1:1	0.5
113	Struthionidae	Struthio camelus	Common ostrich	Europe	France	FALSE	FALSE		Africa,Arabia,south Syria	1	1	0	0	0	0	0	2	1	1	2	1:1	0.5
114	Struthionidae	Struthio camelus	Common ostrich	Europe	France	FALSE	FALSE		Africa,Arabia,south Syria	26	16	1	0	0	0	0	43	26	16	42	1.6:1	0.619048
115	Struthionidae	Struthio camelus	Common ostrich	Europe	France	FALSE	FALSE		Africa,Arabia,south Syria	2	14	0	6	0	0	0	16	2	14	16	0.1:1	0.125
116	Struthionidae	Struthio camelus	Common ostrich	Europe	Germany	FALSE	FALSE		Africa,Arabia,south Syria	0	1	0	0	0	0	0	1	0	1	1	0:1	0
117	Struthionidae	Struthio camelus	Common ostrich	Europe	Germany	FALSE	FALSE		Africa,Arabia,south Syria	1	2	0	0	0	0	0	3	1	2	3	0.5:1	0.333333
118	Struthionidae	Struthio camelus	Common ostrich	Europe	Germany	FALSE	FALSE		Africa,Arabia,south Syria	0	3	0	0	0	0	0	3	0	3	3	0:1	0
119	Struthionidae	Struthio camelus	Common ostrich	Europe	Germany	FALSE	FALSE		Africa,Arabia,south Syria	2	14	0	0	0	0	0	16	2	14	16	0.1:1	0.125
120	Struthionidae	Struthio camelus	Common ostrich	Europe	Germany	FALSE	FALSE		Africa,Arabia,south Syria	0	1	0	0	0	0	0	1	0	1	1	0:1	0
121	Struthionidae	Struthio camelus	Common ostrich	Europe	Germany	FALSE	FALSE		Africa,Arabia,south Syria	0	2	0	0	0	0	0	2	0	2	2	0:1	0
122	Struthionidae	Struthio camelus	Common ostrich	Europe	Germany	FALSE	FALSE		Africa,Arabia,south Syria	2	0	0	2	0	0	0	2	2	0	2	#DIV/0!	1
123	Struthionidae	Struthio camelus	Common ostrich	Europe	Germany	FALSE	FALSE		Africa,Arabia,south Syria	2	2	0	2	0	0	0	4	2	2	4	1:1	0.5
124	Struthionidae	Struthio camelus	Common ostrich	Europe	Germany	FALSE	FALSE		Africa,Arabia,south Syria	0	2	0	0	0	0	0	2	0	2	2	0:1	0
125	Struthionidae	Struthio camelus	Common ostrich	Europe	Greece	FALSE	FALSE		Africa,Arabia,south Syria	1	1	0	0	0	0	0	2	1	1	2	1:1	0.5
126	Struthionidae	Struthio camelus	Common ostrich	Europe	Hungary	FALSE	FALSE		Africa,Arabia,south Syria	0	3	0	0	0	0	0	3	0	3	3	0:1	0
127	Struthionidae	Struthio camelus	Common ostrich	Europe	Hungary	FALSE	FALSE		Africa,Arabia,south Syria	0	2	0	0	0	1	0	3	0	3	3	0:1	0
128	Struthionidae	Struthio camelus	Common ostrich	Europe	Hungary	FALSE	FALSE		Africa,Arabia,south Syria	0	2	0	0	0	0	0	2	0	2	2	0:1	0
129	Struthionidae	Struthio camelus	Common ostrich	Europe	Hungary	FALSE	FALSE		Africa,Arabia,south Syria	0	3	3	0	0	0	0	6	0	3	3	0:1	0
130	Struthionidae	Struthio camelus	Common ostrich	Europe	Ireland	FALSE	FALSE		Africa,Arabia,south Syria	1	3	0	0	0	0	0	4	1	3	4	0.3:1	0.25
131	Struthionidae	Struthio camelus	Common ostrich	Europe	Italy	FALSE	FALSE		Africa,Arabia,south Syria	0	1	0	0	0	0	0	1	0	1	1	0:1	0
132	Struthionidae	Struthio camelus	Common ostrich	Europe	Italy	FALSE	FALSE		Africa,Arabia,south Syria	1	1	0	0	0	0	0	2	1	1	2	1:1	0.5
133	Struthionidae	Struthio camelus	Common ostrich	Europe	Italy	FALSE	FALSE		Africa,Arabia,south Syria	1	0	0	0	0	0	0	1	1	0	1	#DIV/0!	1
134	Struthionidae	Struthio camelus	Common ostrich	Europe	Italy	FALSE	FALSE		Africa,Arabia,south Syria	0	1	0	0	0	0	0	1	0	1	1	0:1	0
135	Struthionidae	Struthio camelus	Common ostrich	Europe	Italy	FALSE	FALSE		Africa,Arabia,south Syria	1	1	0	0	0	0	0	2	1	1	2	1:1	0.5
136	Struthionidae	Struthio camelus	Common ostrich	Europe	Italy	FALSE	FALSE		Africa,Arabia,south Syria	1	2	0	0	0	0	0	3	1	2	3	0.5:1	0.333333
137	Struthionidae	Struthio camelus	Common ostrich	Europe	Italy	FALSE	FALSE		Africa,Arabia,south Syria	1	0	0	0	0	0	0	1	1	0	1	#DIV/0!	1
138	Struthionidae	Struthio camelus	Common ostrich	Europe	Malta	FALSE	FALSE		Africa,Arabia,south Syria	1	1	0	0	0	0	0	2	1	1	2	1:1	0.5
139	Struthionidae	Struthio camelus	Common ostrich	Europe	Netherlands	FALSE	FALSE		Africa,Arabia,south Syria	0	1	0	0	0	0	0	1	0	1	1	0:1	0
140	Struthionidae	Struthio camelus	Common ostrich	Europe	Netherlands	FALSE	FALSE		Africa,Arabia,south Syria	0	6	0	0	0	0	0	6	0	6	6	0:1	0
142	Struthionidae	Struthio camelus	Common ostrich	Europe	Netherlands	FALSE	FALSE		Africa,Arabia,south Syria	0	1	0	0	0	0	0	1	0	1	1	0:1	0
143	Struthionidae	Struthio camelus	Common ostrich	Europe	Norway	FALSE	FALSE		Africa,Arabia,south Syria	3	3	0	0	0	0	0	6	3	3	6	1:1	0.5
144	Struthionidae	Struthio camelus	Common ostrich	Europe	Poland	FALSE	FALSE		Africa,Arabia,south Syria	1	0	0	0	0	2	0	3	1	2	3	0.5:1	0.333333
145	Struthionidae	Struthio camelus	Common ostrich	Europe	Poland	FALSE	FALSE		Africa,Arabia,south Syria	1	1	0	0	0	0	0	2	1	1	2	1:1	0.5
146	Struthionidae	Struthio camelus	Common ostrich	Europe	Poland	FALSE	FALSE		Africa,Arabia,south Syria	0	1	0	0	0	0	0	1	0	1	1	0:1	0
147	Struthionidae	Struthio camelus	Common ostrich	Europe	Poland	FALSE	FALSE		Africa,Arabia,south Syria	1	1	0	0	0	0	0	2	1	1	2	1:1	0.5
148	Struthionidae	Struthio camelus	Common ostrich	Europe	Poland	FALSE	FALSE		Africa,Arabia,south Syria	0	3	0	0	0	0	0	3	0	3	3	0:1	0
149	Struthionidae	Struthio camelus	Common ostrich	Europe	Portugal	FALSE	FALSE		Africa,Arabia,south Syria	9	11	2	0	0	0	15	37	9	11	20	0.8:1	0.45
150	Struthionidae	Struthio camelus	Common ostrich	Europe	Portugal	FALSE	FALSE		Africa,Arabia,south Syria	4	6	0	0	0	3	3	16	4	9	13	0.4:1	0.307692
151	Struthionidae	Struthio camelus	Common ostrich	Europe	Portugal	FALSE	FALSE		Africa,Arabia,south Syria	1	0	0	0	0	0	0	1	1	0	1	#DIV/0!	1
152	Struthionidae	Struthio camelus	Common ostrich	Europe	Portugal	FALSE	FALSE		Africa,Arabia,south Syria	0	1	0	0	0	0	0	1	0	1	1	0:1	0
153	Struthionidae	Struthio camelus	Common ostrich	Europe	Romania	FALSE	FALSE		Africa,Arabia,south Syria	0	0	0	0	1	0	0	1	1	0	1	#DIV/0!	1
154	Struthionidae	Struthio camelus	Common ostrich	Europe	Romania	FALSE	FALSE		Africa,Arabia,south Syria	1	0	0	0	0	0	0	1	1	0	1	#DIV/0!	1
155	Struthionidae	Struthio camelus	Common ostrich	Europe	Russian Federation	FALSE	FALSE		Africa,Arabia,south Syria	1	0	0	0	0	0	0	1	1	0	1	#DIV/0!	1
156	Struthionidae	Struthio camelus	Common ostrich	Europe	Russian Federation	FALSE	FALSE		Africa,Arabia,south Syria	0	0	0	0	1	0	0	1	1	0	1	#DIV/0!	1
157	Struthionidae	Struthio camelus	Common ostrich	Europe	Russian Federation	FALSE	FALSE		Africa,Arabia,south Syria	1	1	0	0	0	0	2	4	1	1	2	1:1	0.5
158	Struthionidae	Struthio camelus	Common ostrich	Europe	Russian Federation	FALSE	FALSE		Africa,Arabia,south Syria	1	2	0	0	0	0	0	3	1	2	3	0.5:1	0.333333
159	Struthionidae	Struthio camelus	Common ostrich	Europe	Russian Federation	FALSE	FALSE		Africa,Arabia,south Syria	1	1	0	0	0	0	0	2	1	1	2	1:1	0.5
160	Struthionidae	Struthio camelus	Common ostrich	Europe	Russian Federation	FALSE	FALSE		Africa,Arabia,south Syria	2	1	0	0	0	0	0	3	2	1	3	2:1	0.666667
161	Struthionidae	Struthio camelus	Common ostrich	Europe	Russian Federation	FALSE	FALSE		Africa,Arabia,south Syria	1	1	0	0	0	0	0	2	1	1	2	1:1	0.5
162	Struthionidae	Struthio camelus	Common ostrich	Europe	Russian Federation	FALSE	FALSE		Africa,Arabia,south Syria	1	2	0	0	0	0	0	3	1	2	3	0.5:1	0.333333
163	Struthionidae	Struthio camelus	Common ostrich	Europe	Serbia	FALSE	FALSE		Africa,Arabia,south Syria	1	0	2	0	0	0	0	3	1	0	1	#DIV/0!	1
164	Struthionidae	Struthio camelus	Common ostrich	Europe	Serbia	FALSE	FALSE		Africa,Arabia,south Syria	0	1	0	0	0	0	0	1	0	1	1	0:1	0
165	Struthionidae	Struthio camelus	Common ostrich	Europe	Slovakia	FALSE	FALSE		Africa,Arabia,south Syria	1	2	0	0	0	0	0	3	1	2	3	0.5:1	0.333333
166	Struthionidae	Struthio camelus	Common ostrich	Europe	Slovakia	FALSE	FALSE		Africa,Arabia,south Syria	0	1	0	0	0	0	0	1	0	1	1	0:1	0
167	Struthionidae	Struthio camelus	Common ostrich	Europe	Slovenia	FALSE	FALSE		Africa,Arabia,south Syria	1	2	0	0	0	0	0	3	1	2	3	0.5:1	0.333333
168	Struthionidae	Struthio camelus	Common ostrich	Europe	Spain	FALSE	FALSE		Africa,Arabia,south Syria	2	2	0	0	0	0	0	4	2	2	4	1:1	0.5
169	Struthionidae	Struthio camelus	Common ostrich	Europe	Spain	FALSE	FALSE		Africa,Arabia,south Syria	1	1	0	0	0	0	0	2	1	1	2	1:1	0.5
170	Struthionidae	Struthio camelus	Common ostrich	Europe	Spain	FALSE	FALSE		Africa,Arabia,south Syria	0	3	0	0	6	2	0	11	6	5	11	1.2:1	0.545455
171	Struthionidae	Struthio camelus	Common ostrich	Europe	Spain	FALSE	FALSE		Africa,Arabia,south Syria	1	3	0	0	0	0	0	4	1	3	4	0.3:1	0.25
172	Struthionidae	Struthio camelus	Common ostrich	Europe	Spain	FALSE	FALSE		Africa,Arabia,south Syria	1	0	0	0	0	0	0	1	1	0	1	#DIV/0!	1
173	Struthionidae	Struthio camelus	Common ostrich	Europe	Spain	FALSE	FALSE		Africa,Arabia,south Syria	2	4	6	3	0	0	0	12	2	4	6	0.5:1	0.333333
174	Struthionidae	Struthio camelus	Common ostrich	Europe	Spain	FALSE	FALSE		Africa,Arabia,south Syria	3	0	0	0	0	0	0	3	3	0	3	#DIV/0!	1
175	Struthionidae	Struthio camelus	Common ostrich	Europe	Spain	FALSE	FALSE		Africa,Arabia,south Syria	3	8	2	0	0	0	0	13	3	8	11	0.4:1	0.272727
176	Struthionidae	Struthio camelus	Common ostrich	Europe	Spain	FALSE	FALSE		Africa,Arabia,south Syria	1	2	0	0	0	0	0	3	1	2	3	0.5:1	0.333333
177	Struthionidae	Struthio camelus	Common ostrich	Europe	Spain	FALSE	FALSE		Africa,Arabia,south Syria	1	3	0	0	0	0	0	4	1	3	4	0.3:1	0.25
178	Struthionidae	Struthio camelus	Common ostrich	Europe	Sweden	FALSE	FALSE		Africa,Arabia,south Syria	0	3	0	0	0	0	0	3	0	3	3	0:1	0
179	Struthionidae	Struthio camelus	Common ostrich	Europe	Sweden	FALSE	FALSE		Africa,Arabia,south Syria	0	2	0	0	0	0	0	2	0	2	2	0:1	0
180	Struthionidae	Struthio camelus	Common ostrich	Europe	Sweden	FALSE	FALSE		Africa,Arabia,south Syria	4	4	0	3	0	0	0	8	4	4	8	1:1	0.5
181	Struthionidae	Struthio camelus	Common ostrich	Europe	Sweden	FALSE	FALSE		Africa,Arabia,south Syria	0	2	0	0	0	0	0	2	0	2	2	0:1	0
182	Struthionidae	Struthio camelus	Common ostrich	Europe	Switzerland	FALSE	FALSE		Africa,Arabia,south Syria	1	1	0	0	0	0	0	2	1	1	2	1:1	0.5
183	Struthionidae	Struthio camelus	Common ostrich	Europe	Switzerland	FALSE	FALSE		Africa,Arabia,south Syria	1	1	0	0	0	0	0	2	1	1	2	1:1	0.5
184	Struthionidae	Struthio camelus	Common ostrich	Europe	Switzerland	FALSE	FALSE		Africa,Arabia,south Syria	0	1	0	0	0	0	0	1	0	1	1	0:1	0
185	Struthionidae	Struthio camelus	Common ostrich	Europe	Ukraine	FALSE	FALSE		Africa,Arabia,south Syria	1	1	0	0	0	0	0	2	1	1	2	1:1	0.5
186	Struthionidae	Struthio camelus	Common ostrich	Europe	Ukraine	FALSE	FALSE		Africa,Arabia,south Syria	1	1	0	0	0	0	0	2	1	1	2	1:1	0.5
187	Struthionidae	Struthio camelus	Common ostrich	Europe	Ukraine	FALSE	FALSE		Africa,Arabia,south Syria	1	2	0	0	0	0	0	3	1	2	3	0.5:1	0.333333
188	Struthionidae	Struthio camelus	Common ostrich	Europe	United Kingdom	FALSE	FALSE		Africa,Arabia,south Syria	1	4	0	0	0	0	0	5	1	4	5	0.3:1	0.2
189	Struthionidae	Struthio camelus	Common ostrich	Europe	United Kingdom	FALSE	FALSE		Africa,Arabia,south Syria	2	0	0	0	0	0	0	2	2	0	2	#DIV/0!	1
190	Struthionidae	Struthio camelus	Common ostrich	Europe	United Kingdom	FALSE	FALSE		Africa,Arabia,south Syria	0	4	0	0	0	0	0	4	0	4	4	0:1	0
191	Struthionidae	Struthio camelus	Common ostrich	Europe	United Kingdom	FALSE	FALSE		Africa,Arabia,south Syria	1	2	0	0	0	0	0	3	1	2	3	0.5:1	0.333333
192	Struthionidae	Struthio camelus	Common ostrich	Europe	United Kingdom	FALSE	FALSE		Africa,Arabia,south Syria	1	2	0	0	0	0	0	3	1	2	3	0.5:1	0.333333
193	Struthionidae	Struthio camelus	Common ostrich	Europe	United Kingdom	FALSE	FALSE		Africa,Arabia,south Syria	1	1	0	0	0	0	0	2	1	1	2	1:1	0.5
194	Struthionidae	Struthio camelus	Common ostrich	Europe	United Kingdom	FALSE	FALSE		Africa,Arabia,south Syria	1	1	0	0	0	0	0	2	1	1	2	1:1	0.5
195	Struthionidae	Struthio camelus	Common ostrich	Europe	United Kingdom	FALSE	FALSE		Africa,Arabia,south Syria	1	0	0	0	0	0	0	1	1	0	1	#DIV/0!	1
196	Struthionidae	Struthio camelus	Common ostrich	Europe	United Kingdom	FALSE	FALSE		Africa,Arabia,south Syria	1	1	0	0	0	0	0	2	1	1	2	1:1	0.5
197	Struthionidae	Struthio camelus	Common ostrich	Europe	United Kingdom	FALSE	FALSE		Africa,Arabia,south Syria	1	2	0	0	0	0	0	3	1	2	3	0.5:1	0.333333
198	Struthionidae	Struthio camelus	Common ostrich	Europe	United Kingdom	FALSE	FALSE		Africa,Arabia,south Syria	0	2	0	0	0	0	0	2	0	2	2	0:1	0
199	Struthionidae	Struthio camelus	Common ostrich	Europe	United Kingdom	FALSE	FALSE		Africa,Arabia,south Syria	1	4	0	0	0	0	0	5	1	4	5	0.3:1	0.2
200	Struthionidae	Struthio camelus	Common ostrich	Europe	United Kingdom	FALSE	FALSE		Africa,Arabia,south Syria	2	0	0	0	0	0	0	2	2	0	2	#DIV/0!	1
201	Struthionidae	Struthio camelus	Common ostrich	Europe	United Kingdom	FALSE	FALSE		Africa,Arabia,south Syria	1	1	0	0	0	0	0	2	1	1	2	1:1	0.5
202	Struthionidae	Struthio camelus	Common ostrich	Europe	United Kingdom	FALSE	FALSE		Africa,Arabia,south Syria	0	1	0	0	0	0	0	1	0	1	1	0:1	0
203	Struthionidae	Struthio camelus	Common ostrich	Europe	United Kingdom	FALSE	FALSE		Africa,Arabia,south Syria	0	2	0	0	0	0	0	2	0	2	2	0:1	0
204	Struthionidae	Struthio camelus	Common ostrich	Europe	United Kingdom	FALSE	FALSE		Africa,Arabia,south Syria	2	0	0	0	0	0	0	2	2	0	2	#DIV/0!	1
205	Struthionidae	Struthio camelus	Common ostrich	Europe	United Kingdom	FALSE	FALSE		Africa,Arabia,south Syria	3	0	0	0	0	0	0	3	3	0	3	#DIV/0!	1
206	Struthionidae	Struthio camelus	Common ostrich	Europe	United Kingdom	FALSE	FALSE		Africa,Arabia,south Syria	1	3	0	0	0	0	0	4	1	3	4	0.3:1	0.25
207	Struthionidae	Struthio camelus	Common ostrich	Europe	United Kingdom	FALSE	FALSE		Africa,Arabia,south Syria	0	1	0	0	0	3	0	4	0	4	4	0:1	0
208	Struthionidae	Struthio camelus	Common ostrich	North America	Canada	FALSE	FALSE		Africa,Arabia,south Syria	1	2	0	0	0	0	0	3	1	2	3	0.5:1	0.333333
209	Struthionidae	Struthio camelus	Common ostrich	North America	Canada	FALSE	FALSE		Africa,Arabia,south Syria	0	3	0	0	0	0	0	3	0	3	3	0:1	0
210	Struthionidae	Struthio camelus	Common ostrich	North America	Canada	FALSE	FALSE		Africa,Arabia,south Syria	1	1	0	0	0	0	0	2	1	1	2	1:1	0.5
212	Struthionidae	Struthio camelus	Common ostrich	North America	Guatemala	FALSE	FALSE		Africa,Arabia,south Syria	2	2	0	0	0	0	10	14	2	2	4	1:1	0.5
213	Struthionidae	Struthio camelus	Common ostrich	North America	Mexico	FALSE	FALSE		Africa,Arabia,south Syria	4	5	10	1	0	0	0	19	4	5	9	0.8:1	0.444444
214	Struthionidae	Struthio camelus	Common ostrich	North America	Mexico	FALSE	FALSE		Africa,Arabia,south Syria	1	1	0	0	0	0	0	2	1	1	2	1:1	0.5
215	Struthionidae	Struthio camelus	Common ostrich	North America	Mexico	FALSE	FALSE		Africa,Arabia,south Syria	4	1	0	0	0	0	0	5	4	1	5	4:1	0.8
216	Struthionidae	Struthio camelus	Common ostrich	North America	Mexico	FALSE	FALSE		Africa,Arabia,south Syria	0	3	0	0	0	0	3	6	0	3	3	0:1	0
217	Struthionidae	Struthio camelus	Common ostrich	North America	Mexico	FALSE	FALSE		Africa,Arabia,south Syria	1	2	0	0	0	0	0	3	1	2	3	0.5:1	0.333333
218	Struthionidae	Struthio camelus	Common ostrich	North America	United States	FALSE	FALSE		Africa,Arabia,south Syria	1	2	0	0	0	0	0	3	1	2	3	0.5:1	0.333333
219	Struthionidae	Struthio camelus	Common ostrich	North America	United States	FALSE	FALSE		Africa,Arabia,south Syria	0	5	0	0	0	0	0	5	0	5	5	0:1	0
220	Struthionidae	Struthio camelus	Common ostrich	North America	United States	FALSE	FALSE		Africa,Arabia,south Syria	0	2	0	0	0	0	0	2	0	2	2	0:1	0
221	Struthionidae	Struthio camelus	Common ostrich	North America	United States	FALSE	FALSE		Africa,Arabia,south Syria	0	3	0	0	0	0	0	3	0	3	3	0:1	0
222	Struthionidae	Struthio camelus	Common ostrich	North America	United States	FALSE	FALSE		Africa,Arabia,south Syria	0	1	0	0	0	0	0	1	0	1	1	0:1	0
223	Struthionidae	Struthio camelus	Common ostrich	North America	United States	FALSE	FALSE		Africa,Arabia,south Syria	0	3	0	0	0	0	0	3	0	3	3	0:1	0
224	Struthionidae	Struthio camelus	Common ostrich	North America	United States	FALSE	FALSE		Africa,Arabia,south Syria	0	2	0	0	0	0	0	2	0	2	2	0:1	0
225	Struthionidae	Struthio camelus	Common ostrich	North America	United States	FALSE	FALSE		Africa,Arabia,south Syria	1	1	0	0	0	0	0	2	1	1	2	1:1	0.5
226	Struthionidae	Struthio camelus	Common ostrich	North America	United States	FALSE	FALSE		Africa,Arabia,south Syria	1	0	0	0	0	0	0	1	1	0	1	#DIV/0!	1
227	Struthionidae	Struthio camelus	Common ostrich	North America	United States	FALSE	FALSE		Africa,Arabia,south Syria	1	7	0	0	0	0	0	8	1	7	8	0.1:1	0.125
228	Struthionidae	Struthio camelus	Common ostrich	North America	United States	FALSE	FALSE		Africa,Arabia,south Syria	1	0	0	0	0	0	0	1	1	0	1	#DIV/0!	1
229	Struthionidae	Struthio camelus	Common ostrich	North America	United States	FALSE	FALSE		Africa,Arabia,south Syria	1	1	0	0	0	0	0	2	1	1	2	1:1	0.5
230	Struthionidae	Struthio camelus	Common ostrich	North America	United States	FALSE	FALSE		Africa,Arabia,south Syria	0	2	0	0	0	0	0	2	0	2	2	0:1	0
231	Struthionidae	Struthio camelus	Common ostrich	North America	United States	FALSE	FALSE		Africa,Arabia,south Syria	1	1	0	0	0	0	0	2	1	1	2	1:1	0.5
232	Struthionidae	Struthio camelus	Common ostrich	North America	United States	FALSE	FALSE		Africa,Arabia,south Syria	0	2	0	0	0	0	0	2	0	2	2	0:1	0
233	Struthionidae	Struthio camelus	Common ostrich	North America	United States	FALSE	FALSE		Africa,Arabia,south Syria	0	2	0	0	0	0	0	2	0	2	2	0:1	0
234	Struthionidae	Struthio camelus	Common ostrich	North America	United States	FALSE	FALSE		Africa,Arabia,south Syria	0	6	0	0	0	0	0	6	0	6	6	0:1	0
235	Struthionidae	Struthio camelus	Common ostrich	North America	United States	FALSE	FALSE		Africa,Arabia,south Syria	0	2	0	0	0	0	0	2	0	2	2	0:1	0
236	Struthionidae	Struthio camelus	Common ostrich	North America	United States	FALSE	FALSE		Africa,Arabia,south Syria	1	1	0	0	0	0	0	2	1	1	2	1:1	0.5
237	Struthionidae	Struthio camelus	Common ostrich	North America	United States	FALSE	FALSE		Africa,Arabia,south Syria	1	0	0	0	0	0	0	1	1	0	1	#DIV/0!	1
238	Struthionidae	Struthio camelus	Common ostrich	North America	United States	FALSE	FALSE		Africa,Arabia,south Syria	1	1	0	0	0	0	0	2	1	1	2	1:1	0.5
239	Struthionidae	Struthio camelus	Common ostrich	North America	United States	FALSE	FALSE		Africa,Arabia,south Syria	0	7	0	0	0	0	0	7	0	7	7	0:1	0
240	Struthionidae	Struthio camelus	Common ostrich	North America	United States	FALSE	FALSE		Africa,Arabia,south Syria	1	1	0	0	0	0	0	2	1	1	2	1:1	0.5
241	Struthionidae	Struthio camelus	Common ostrich	North America	United States	FALSE	FALSE		Africa,Arabia,south Syria	0	1	0	0	0	0	0	1	0	1	1	0:1	0
242	Struthionidae	Struthio camelus	Common ostrich	North America	United States	FALSE	FALSE		Africa,Arabia,south Syria	0	4	0	0	0	0	0	4	0	4	4	0:1	0
243	Struthionidae	Struthio camelus	Common ostrich	North America	United States	FALSE	FALSE		Africa,Arabia,south Syria	1	1	0	0	0	0	0	2	1	1	2	1:1	0.5
244	Struthionidae	Struthio camelus	Common ostrich	North America	United States	FALSE	FALSE		Africa,Arabia,south Syria	0	2	0	0	0	0	0	2	0	2	2	0:1	0
245	Struthionidae	Struthio camelus	Common ostrich	North America	United States	FALSE	FALSE		Africa,Arabia,south Syria	0	1	0	0	0	0	0	1	0	1	1	0:1	0
246	Struthionidae	Struthio camelus	Common ostrich	North America	United States	FALSE	FALSE		Africa,Arabia,south Syria	1	1	0	0	0	0	0	2	1	1	2	1:1	0.5
247	Struthionidae	Struthio camelus	Common ostrich	North America	United States	FALSE	FALSE		Africa,Arabia,south Syria	0	1	0	0	0	0	0	1	0	1	1	0:1	0
248	Struthionidae	Struthio camelus	Common ostrich	North America	United States	FALSE	FALSE		Africa,Arabia,south Syria	1	2	0	0	0	0	0	3	1	2	3	0.5:1	0.333333
249	Struthionidae	Struthio camelus	Common ostrich	North America	United States	FALSE	FALSE		Africa,Arabia,south Syria	1	0	0	0	0	0	0	1	1	0	1	#DIV/0!	1
250	Struthionidae	Struthio camelus	Common ostrich	North America	United States	FALSE	FALSE		Africa,Arabia,south Syria	0	2	0	0	0	1	0	3	0	3	3	0:1	0
251	Struthionidae	Struthio camelus	Common ostrich	North America	United States	FALSE	FALSE		Africa,Arabia,south Syria	1	2	0	0	0	0	0	3	1	2	3	0.5:1	0.333333
252	Struthionidae	Struthio camelus	Common ostrich	North America	United States	FALSE	FALSE		Africa,Arabia,south Syria	1	1	0	0	0	0	0	2	1	1	2	1:1	0.5
253	Struthionidae	Struthio camelus	Common ostrich	North America	United States	FALSE	FALSE		Africa,Arabia,south Syria	0	1	0	0	0	0	0	1	0	1	1	0:1	0
254	Struthionidae	Struthio camelus	Common ostrich	North America	United States	FALSE	FALSE		Africa,Arabia,south Syria	1	1	0	0	0	0	0	2	1	1	2	1:1	0.5
255	Struthionidae	Struthio camelus	Common ostrich	North America	United States	FALSE	FALSE		Africa,Arabia,south Syria	2	1	0	0	0	0	0	3	2	1	3	2:1	0.666667
256	Struthionidae	Struthio camelus	Common ostrich	North America	United States	FALSE	FALSE		Africa,Arabia,south Syria	0	2	0	0	0	0	0	2	0	2	2	0:1	0
257	Struthionidae	Struthio camelus	Common ostrich	North America	United States	FALSE	FALSE		Africa,Arabia,south Syria	0	4	0	0	0	0	0	4	0	4	4	0:1	0
258	Struthionidae	Struthio camelus	Common ostrich	North America	United States	FALSE	FALSE		Africa,Arabia,south Syria	0	2	0	0	0	0	0	2	0	2	2	0:1	0
259	Struthionidae	Struthio camelus	Common ostrich	North America	United States	FALSE	FALSE		Africa,Arabia,south Syria	1	2	0	0	0	0	0	3	1	2	3	0.5:1	0.333333
260	Struthionidae	Struthio camelus	Common ostrich	North America	United States	FALSE	FALSE		Africa,Arabia,south Syria	1	3	0	0	0	0	0	4	1	3	4	0.3:1	0.25
261	Struthionidae	Struthio camelus	Common ostrich	North America	United States	FALSE	FALSE		Africa,Arabia,south Syria	0	1	0	0	0	0	0	1	0	1	1	0:1	0
262	Struthionidae	Struthio camelus	Common ostrich	North America	United States	FALSE	FALSE		Africa,Arabia,south Syria	0	5	0	0	0	0	0	5	0	5	5	0:1	0
263	Struthionidae	Struthio camelus	Common ostrich	North America	United States	FALSE	FALSE		Africa,Arabia,south Syria	0	2	0	0	0	0	0	2	0	2	2	0:1	0
264	Struthionidae	Struthio camelus	Common ostrich	North America	United States	FALSE	FALSE		Africa,Arabia,south Syria	0	1	0	0	0	0	0	1	0	1	1	0:1	0
265	Struthionidae	Struthio camelus	Common ostrich	North America	United States	FALSE	FALSE		Africa,Arabia,south Syria	0	2	0	0	0	0	0	2	0	2	2	0:1	0
266	Struthionidae	Struthio camelus	Common ostrich	North America	United States	FALSE	FALSE		Africa,Arabia,south Syria	1	2	0	0	0	0	0	3	1	2	3	0.5:1	0.333333
267	Struthionidae	Struthio camelus	Common ostrich	North America	United States	FALSE	FALSE		Africa,Arabia,south Syria	0	2	0	0	0	0	0	2	0	2	2	0:1	0
268	Struthionidae	Struthio camelus	Common ostrich	North America	United States	FALSE	FALSE		Africa,Arabia,south Syria	0	2	0	0	0	0	0	2	0	2	2	0:1	0
269	Struthionidae	Struthio camelus	Common ostrich	North America	United States	FALSE	FALSE		Africa,Arabia,south Syria	0	4	0	0	0	0	0	4	0	4	4	0:1	0
270	Struthionidae	Struthio camelus	Common ostrich	North America	United States	FALSE	FALSE		Africa,Arabia,south Syria	1	1	0	0	0	0	0	2	1	1	2	1:1	0.5
271	Struthionidae	Struthio camelus	Common ostrich	North America	United States	FALSE	FALSE		Africa,Arabia,south Syria	1	1	0	0	0	0	0	2	1	1	2	1:1	0.5
272	Struthionidae	Struthio camelus	Common ostrich	North America	United States	FALSE	FALSE		Africa,Arabia,south Syria	1	0	0	0	0	0	0	1	1	0	1	#DIV/0!	1
273	Struthionidae	Struthio camelus	Common ostrich	North America	United States	FALSE	FALSE		Africa,Arabia,south Syria	0	1	0	0	0	0	0	1	0	1	1	0:1	0
274	Struthionidae	Struthio camelus	Common ostrich	North America	United States	FALSE	FALSE		Africa,Arabia,south Syria	0	1	0	0	0	0	0	1	0	1	1	0:1	0
276	Struthionidae	Struthio camelus	Common ostrich	North America	United States	FALSE	FALSE		Africa,Arabia,south Syria	1	2	1	1	0	0	0	4	1	2	3	0.5:1	0.333333
277	Struthionidae	Struthio camelus	Common ostrich	North America	United States	FALSE	FALSE		Africa,Arabia,south Syria	1	1	0	0	0	0	0	2	1	1	2	1:1	0.5
278	Struthionidae	Struthio camelus	Common ostrich	North America	United States	FALSE	FALSE		Africa,Arabia,south Syria	1	0	0	0	0	0	0	1	1	0	1	#DIV/0!	1
279	Struthionidae	Struthio camelus	Common ostrich	North America	United States	FALSE	FALSE		Africa,Arabia,south Syria	0	3	0	0	0	0	0	3	0	3	3	0:1	0
280	Struthionidae	Struthio camelus	Common ostrich	North America	United States	FALSE	FALSE		Africa,Arabia,south Syria	7	14	0	0	0	0	0	21	7	14	21	0.5:1	0.333333
281	Struthionidae	Struthio camelus	Common ostrich	North America	United States	FALSE	FALSE		Africa,Arabia,south Syria	2	3	0	0	0	0	0	5	2	3	5	0.7:1	0.4
283	Struthionidae	Struthio camelus	Common ostrich	North America	United States	FALSE	FALSE		Africa,Arabia,south Syria	0	2	0	0	0	0	18	19	0	2	2	0:1	0
284	Struthionidae	Struthio camelus	Common ostrich	North America	United States	FALSE	FALSE		Africa,Arabia,south Syria	0	3	0	0	0	0	0	3	0	3	3	0:1	0
285	Struthionidae	Struthio camelus	Common ostrich	North America	United States	FALSE	FALSE		Africa,Arabia,south Syria	2	0	0	0	0	0	0	2	2	0	2	#DIV/0!	1
286	Struthionidae	Struthio camelus	Common ostrich	South America	Argentina	FALSE	FALSE		Africa,Arabia,south Syria	1	3	0	0	0	0	0	4	1	3	4	0.3:1	0.25
287	Struthionidae	Struthio camelus	Common ostrich	South America	Argentina	FALSE	FALSE		Africa,Arabia,south Syria	1	2	0	0	0	0	0	3	1	2	3	0.5:1	0.333333
288	Struthionidae	Struthio camelus	Common ostrich	South America	Brazil	FALSE	FALSE		Africa,Arabia,south Syria	2	0	0	0	0	0	0	2	2	0	2	#DIV/0!	1
289	Struthionidae	Struthio camelus	Common ostrich	South America	Brazil	FALSE	FALSE		Africa,Arabia,south Syria	2	1	0	0	0	0	0	3	2	1	3	2:1	0.666667
290	Struthionidae	Struthio camelus	Common ostrich	South America	Brazil	FALSE	FALSE		Africa,Arabia,south Syria	1	1	1	0	0	0	0	3	1	1	2	1:1	0.5
291	Struthionidae	Struthio camelus	Common ostrich	South America	Brazil	FALSE	FALSE		Africa,Arabia,south Syria	0	3	0	0	0	0	0	3	0	3	3	0:1	0
292	Struthionidae	Struthio camelus	Common ostrich	South America	Chile	FALSE	FALSE		Africa,Arabia,south Syria	1	3	0	0	0	0	0	4	1	3	4	0.3:1	0.25
293	Struthionidae	Struthio camelus	Common ostrich	South America	Colombia	FALSE	FALSE		Africa,Arabia,south Syria	1	2	0	0	0	0	0	3	1	2	3	0.5:1	0.333333
294	Struthionidae	Struthio camelus	Common ostrich	South America	Colombia	FALSE	FALSE		Africa,Arabia,south Syria	3	0	0	0	0	0	0	3	3	0	3	#DIV/0!	1
295	Struthionidae	Struthio camelus	Common ostrich	South America	Colombia	FALSE	FALSE		Africa,Arabia,south Syria	1	3	0	0	0	0	0	4	1	3	4	0.3:1	0.25
296	Struthionidae	Struthio camelus	Common ostrich	South America	Colombia	FALSE	FALSE		Africa,Arabia,south Syria	1	1	0	0	0	0	0	2	1	1	2	1:1	0.5
297	Struthionidae	Struthio camelus	Common ostrich	South America	Colombia	FALSE	FALSE		Africa,Arabia,south Syria	3	2	0	0	0	0	0	5	3	2	5	1.5:1	0.6
298	Struthionidae	Struthio camelus	Common ostrich	South America	Colombia	FALSE	FALSE		Africa,Arabia,south Syria	1	2	0	0	0	0	0	3	1	2	3	0.5:1	0.333333
299	Struthionidae	Struthio camelus	Common ostrich	South America	Colombia	FALSE	FALSE		Africa,Arabia,south Syria	3	6	0	0	0	0	0	9	3	6	9	0.5:1	0.333333
300	Struthionidae	Struthio camelus	Common ostrich	South America	Ecuador	FALSE	FALSE		Africa,Arabia,south Syria	1	2	0	0	0	0	0	3	1	2	3	0.5:1	0.333333
301	Struthionidae	Struthio camelus	Common ostrich	South America	Ecuador	FALSE	FALSE		Africa,Arabia,south Syria	1	0	0	0	0	0	0	1	1	0	1	#DIV/0!	1
302	Struthionidae	Struthio camelus camelus	African ostrich	Asia	India	FALSE	FALSE		<p>Sahel of North Africa and the Sudan</p>	1	0	0	0	1	0	0	2	2	0	2	#DIV/0!	1
303	Struthionidae	Struthio camelus camelus	African ostrich	Asia	Israel	FALSE	FALSE		<p>Sahel of North Africa and the Sudan</p>	2	3	0	0	0	0	0	5	2	3	5	0.7:1	0.4
304	Struthionidae	Struthio camelus camelus	African ostrich	Asia	Israel	FALSE	FALSE		<p>Sahel of North Africa and the Sudan</p>	1	0	0	0	0	0	0	1	1	0	1	#DIV/0!	1
305	Struthionidae	Struthio camelus camelus	African ostrich	Asia	Japan	FALSE	FALSE		<p>Sahel of North Africa and the Sudan</p>	0	1	0	0	0	0	0	1	0	1	1	0:1	0
306	Struthionidae	Struthio camelus camelus	African ostrich	Asia	Japan	FALSE	FALSE		<p>Sahel of North Africa and the Sudan</p>	1	1	0	0	0	0	0	2	1	1	2	1:1	0.5
307	Struthionidae	Struthio camelus camelus	African ostrich	Asia	Malaysia	FALSE	FALSE		<p>Sahel of North Africa and the Sudan</p>	3	3	0	0	0	0	0	6	3	3	6	1:1	0.5
308	Struthionidae	Struthio camelus camelus	African ostrich	Asia	United Arab Emirates	FALSE	FALSE		<p>Sahel of North Africa and the Sudan</p>	1	0	0	0	0	0	0	1	1	0	1	#DIV/0!	1
309	Struthionidae	Struthio camelus camelus	African ostrich	Asia	United Arab Emirates	FALSE	FALSE		<p>Sahel of North Africa and the Sudan</p>	1	5	0	0	0	0	0	6	1	5	6	0.2:1	0.166667
311	Struthionidae	Struthio camelus camelus	African ostrich	Asia	United Arab Emirates	FALSE	FALSE		<p>Sahel of North Africa and the Sudan</p>	1	5	13	0	0	0	0	19	1	5	6	0.2:1	0.166667
313	Struthionidae	Struthio camelus camelus	African ostrich	Australia (Oceania)	Australia	FALSE	FALSE		<p>Sahel of North Africa and the Sudan</p>	1	0	0	0	0	0	0	1	1	0	1	#DIV/0!	1
314	Struthionidae	Struthio camelus camelus	African ostrich	Australia (Oceania)	Australia	FALSE	FALSE		<p>Sahel of North Africa and the Sudan</p>	0	3	0	0	0	0	0	3	0	3	3	0:1	0
315	Struthionidae	Struthio camelus camelus	African ostrich	Europe	Austria	FALSE	FALSE		<p>Sahel of North Africa and the Sudan</p>	1	2	0	0	0	0	0	3	1	2	3	0.5:1	0.333333
316	Struthionidae	Struthio camelus camelus	African ostrich	Europe	France	FALSE	FALSE		<p>Sahel of North Africa and the Sudan</p>	0	4	0	0	0	0	0	4	0	4	4	0:1	0
317	Struthionidae	Struthio camelus camelus	African ostrich	Europe	France	FALSE	FALSE		<p>Sahel of North Africa and the Sudan</p>	1	1	0	0	0	0	0	2	1	1	2	1:1	0.5
318	Struthionidae	Struthio camelus camelus	African ostrich	Europe	France	FALSE	FALSE		<p>Sahel of North Africa and the Sudan</p>	7	4	0	2	0	0	0	11	7	4	11	1.8:1	0.636364
319	Struthionidae	Struthio camelus camelus	African ostrich	Europe	Germany	FALSE	FALSE		<p>Sahel of North Africa and the Sudan</p>	1	1	0	0	0	0	0	2	1	1	2	1:1	0.5
320	Struthionidae	Struthio camelus camelus	African ostrich	Europe	Germany	FALSE	FALSE		<p>Sahel of North Africa and the Sudan</p>	0	1	0	0	0	0	0	1	0	1	1	0:1	0
321	Struthionidae	Struthio camelus camelus	African ostrich	Europe	Germany	FALSE	FALSE		<p>Sahel of North Africa and the Sudan</p>	1	1	0	0	0	0	0	2	1	1	2	1:1	0.5
322	Struthionidae	Struthio camelus camelus	African ostrich	Europe	Germany	FALSE	FALSE		<p>Sahel of North Africa and the Sudan</p>	1	1	0	0	0	0	0	2	1	1	2	1:1	0.5
323	Struthionidae	Struthio camelus camelus	African ostrich	Europe	Germany	FALSE	FALSE		<p>Sahel of North Africa and the Sudan</p>	1	1	0	0	0	0	0	2	1	1	2	1:1	0.5
324	Struthionidae	Struthio camelus camelus	African ostrich	Europe	Netherlands	FALSE	FALSE		<p>Sahel of North Africa and the Sudan</p>	1	1	0	0	0	0	0	2	1	1	2	1:1	0.5
325	Struthionidae	Struthio camelus camelus	African ostrich	Europe	Netherlands	FALSE	FALSE		<p>Sahel of North Africa and the Sudan</p>	1	2	0	0	0	0	0	3	1	2	3	0.5:1	0.333333
326	Struthionidae	Struthio camelus camelus	African ostrich	Europe	Spain	FALSE	FALSE		<p>Sahel of North Africa and the Sudan</p>	2	2	0	2	0	0	0	4	2	2	4	1:1	0.5
327	Struthionidae	Struthio camelus camelus	African ostrich	Europe	Spain	FALSE	FALSE		<p>Sahel of North Africa and the Sudan</p>	0	1	0	0	0	0	0	1	0	1	1	0:1	0
328	Struthionidae	Struthio camelus camelus	African ostrich	Europe	Spain	FALSE	FALSE		<p>Sahel of North Africa and the Sudan</p>	0	1	0	0	0	0	0	1	0	1	1	0:1	0
329	Struthionidae	Struthio camelus camelus	African ostrich	Europe	Ukraine	FALSE	FALSE		<p>Sahel of North Africa and the Sudan</p>	0	1	0	0	0	0	0	1	0	1	1	0:1	0
330	Struthionidae	Struthio camelus camelus	African ostrich	Europe	United Kingdom	FALSE	FALSE		<p>Sahel of North Africa and the Sudan</p>	0	1	0	0	0	0	0	1	0	1	1	0:1	0
331	Struthionidae	Struthio camelus camelus	African ostrich	North America	Canada	FALSE	FALSE		<p>Sahel of North Africa and the Sudan</p>	1	2	0	0	0	0	0	3	1	2	3	0.5:1	0.333333
333	Struthionidae	Struthio camelus camelus	African ostrich	North America	United States	FALSE	FALSE		<p>Sahel of North Africa and the Sudan</p>	0	1	0	0	0	0	0	1	0	1	1	0:1	0
334	Struthionidae	Struthio camelus camelus	African ostrich	North America	United States	FALSE	FALSE		<p>Sahel of North Africa and the Sudan</p>	0	2	0	0	0	0	0	2	0	2	2	0:1	0
335	Struthionidae	Struthio camelus camelus	African ostrich	North America	United States	FALSE	FALSE		<p>Sahel of North Africa and the Sudan</p>	0	1	0	0	0	0	0	1	0	1	1	0:1	0
336	Struthionidae	Struthio camelus camelus	African ostrich	North America	United States	FALSE	FALSE		<p>Sahel of North Africa and the Sudan</p>	3	1	0	0	11	7	0	22	14	8	22	1.8:1	0.636364
337	Struthionidae	Struthio camelus camelus	African ostrich	North America	United States	FALSE	FALSE		<p>Sahel of North Africa and the Sudan</p>	1	0	0	0	0	0	0	1	1	0	1	#DIV/0!	1
338	Struthionidae	Struthio camelus camelus	African ostrich	North America	United States	FALSE	FALSE		<p>Sahel of North Africa and the Sudan</p>	1	0	0	0	0	0	0	1	1	0	1	#DIV/0!	1
342	Struthionidae	Struthio camelus australis	Southern ostrich	Africa	Egypt	TRUE	TRUE		<p>Southern Africa</p>	4	7	0	0	0	0	0	11	4	7	11	0.6:1	0.363636
344	Struthionidae	Struthio camelus australis	Southern ostrich	Asia	Lao People's Democratic Republic	FALSE	FALSE		<p>Southern Africa</p>	0	1	0	0	0	0	0	1	0	1	1	0:1	0
345	Struthionidae	Struthio camelus australis	Southern ostrich	Asia	Malaysia	FALSE	FALSE		<p>Southern Africa</p>	3	2	0	0	0	0	0	5	3	2	5	1.5:1	0.6
346	Struthionidae	Struthio camelus australis	Southern ostrich	Asia	United Arab Emirates	FALSE	FALSE		<p>Southern Africa</p>	3	0	0	0	0	0	0	3	3	0	3	#DIV/0!	1
347	Struthionidae	Struthio camelus australis	Southern ostrich	Europe	Austria	FALSE	FALSE		<p>Southern Africa</p>	0	1	0	0	0	0	0	1	0	1	1	0:1	0
348	Struthionidae	Struthio camelus australis	Southern ostrich	Europe	Denmark	FALSE	FALSE		<p>Southern Africa</p>	0	2	0	0	0	0	0	2	0	2	2	0:1	0
349	Struthionidae	Struthio camelus australis	Southern ostrich	Europe	Denmark	FALSE	FALSE		<p>Southern Africa</p>	0	2	0	0	0	0	0	2	0	2	2	0:1	0
350	Struthionidae	Struthio camelus australis	Southern ostrich	Europe	France	FALSE	FALSE		<p>Southern Africa</p>	0	3	0	0	0	0	0	3	0	3	3	0:1	0
351	Struthionidae	Struthio camelus australis	Southern ostrich	Europe	France	FALSE	FALSE		<p>Southern Africa</p>	0	3	0	0	0	0	0	3	0	3	3	0:1	0
352	Struthionidae	Struthio camelus australis	Southern ostrich	Europe	France	FALSE	FALSE		<p>Southern Africa</p>	1	0	0	0	0	0	0	1	1	0	1	#DIV/0!	1
353	Struthionidae	Struthio camelus australis	Southern ostrich	Europe	France	FALSE	FALSE		<p>Southern Africa</p>	0	1	0	0	0	0	0	1	0	1	1	0:1	0
354	Struthionidae	Struthio camelus australis	Southern ostrich	Europe	France	FALSE	FALSE		<p>Southern Africa</p>	0	1	0	0	0	0	0	1	0	1	1	0:1	0
355	Struthionidae	Struthio camelus australis	Southern ostrich	Europe	France	FALSE	FALSE		<p>Southern Africa</p>	0	3	0	0	0	0	0	3	0	3	3	0:1	0
356	Struthionidae	Struthio camelus australis	Southern ostrich	Europe	France	FALSE	FALSE		<p>Southern Africa</p>	0	3	0	0	0	0	0	3	0	3	3	0:1	0
357	Struthionidae	Struthio camelus australis	Southern ostrich	Europe	France	FALSE	FALSE		<p>Southern Africa</p>	5	0	0	0	0	0	0	5	5	0	5	#DIV/0!	1
358	Struthionidae	Struthio camelus australis	Southern ostrich	Europe	Germany	FALSE	FALSE		<p>Southern Africa</p>	1	1	0	0	0	0	0	2	1	1	2	1:1	0.5
359	Struthionidae	Struthio camelus australis	Southern ostrich	Europe	Germany	FALSE	FALSE		<p>Southern Africa</p>	1	0	0	0	0	0	0	1	1	0	1	#DIV/0!	1
360	Struthionidae	Struthio camelus australis	Southern ostrich	Europe	Germany	FALSE	FALSE		<p>Southern Africa</p>	1	3	0	0	0	0	0	4	1	3	4	0.3:1	0.25
361	Struthionidae	Struthio camelus australis	Southern ostrich	Europe	Germany	FALSE	FALSE		<p>Southern Africa</p>	1	2	0	0	0	0	0	3	1	2	3	0.5:1	0.333333
362	Struthionidae	Struthio camelus australis	Southern ostrich	Europe	Germany	FALSE	FALSE		<p>Southern Africa</p>	0	3	0	0	0	0	0	3	0	3	3	0:1	0
363	Struthionidae	Struthio camelus australis	Southern ostrich	Europe	Germany	FALSE	FALSE		<p>Southern Africa</p>	0	2	0	0	0	0	0	2	0	2	2	0:1	0
364	Struthionidae	Struthio camelus australis	Southern ostrich	Europe	Germany	FALSE	FALSE		<p>Southern Africa</p>	0	1	0	0	0	0	0	1	0	1	1	0:1	0
365	Struthionidae	Struthio camelus australis	Southern ostrich	Europe	Germany	FALSE	FALSE		<p>Southern Africa</p>	0	1	0	0	0	0	0	1	0	1	1	0:1	0
366	Struthionidae	Struthio camelus australis	Southern ostrich	Europe	Germany	FALSE	FALSE		<p>Southern Africa</p>	1	1	0	0	0	0	0	2	1	1	2	1:1	0.5
367	Struthionidae	Struthio camelus australis	Southern ostrich	Europe	Germany	FALSE	FALSE		<p>Southern Africa</p>	1	4	0	0	0	0	0	5	1	4	5	0.3:1	0.2
368	Struthionidae	Struthio camelus australis	Southern ostrich	Europe	Germany	FALSE	FALSE		<p>Southern Africa</p>	1	2	0	0	0	0	0	3	1	2	3	0.5:1	0.333333
369	Struthionidae	Struthio camelus australis	Southern ostrich	Europe	Germany	FALSE	FALSE		<p>Southern Africa</p>	0	1	0	0	0	0	0	1	0	1	1	0:1	0
370	Struthionidae	Struthio camelus australis	Southern ostrich	Europe	Germany	FALSE	FALSE		<p>Southern Africa</p>	1	0	0	0	0	0	0	1	1	0	1	#DIV/0!	1
371	Struthionidae	Struthio camelus australis	Southern ostrich	Europe	Netherlands	FALSE	FALSE		<p>Southern Africa</p>	0	1	0	0	0	0	0	1	0	1	1	0:1	0
372	Struthionidae	Struthio camelus australis	Southern ostrich	Europe	Netherlands	FALSE	FALSE		<p>Southern Africa</p>	10	6	0	0	0	0	0	16	10	6	16	1.7:1	0.625
373	Struthionidae	Struthio camelus australis	Southern ostrich	Europe	Netherlands	FALSE	FALSE		<p>Southern Africa</p>	0	4	0	0	0	0	0	4	0	4	4	0:1	0
374	Struthionidae	Struthio camelus australis	Southern ostrich	Europe	Netherlands	FALSE	FALSE		<p>Southern Africa</p>	0	2	0	0	0	0	0	2	0	2	2	0:1	0
375	Struthionidae	Struthio camelus australis	Southern ostrich	Europe	Poland	FALSE	FALSE		<p>Southern Africa</p>	1	2	0	0	0	0	0	3	1	2	3	0.5:1	0.333333
376	Struthionidae	Struthio camelus australis	Southern ostrich	Europe	Poland	FALSE	FALSE		<p>Southern Africa</p>	1	4	0	0	0	0	0	5	1	4	5	0.3:1	0.2
377	Struthionidae	Struthio camelus australis	Southern ostrich	Europe	Sweden	FALSE	FALSE		<p>Southern Africa</p>	1	0	0	0	0	0	0	1	1	0	1	#DIV/0!	1
378	Struthionidae	Struthio camelus australis	Southern ostrich	Europe	Switzerland	FALSE	FALSE		<p>Southern Africa</p>	1	0	0	0	0	0	0	1	1	0	1	#DIV/0!	1
379	Struthionidae	Struthio camelus australis	Southern ostrich	Europe	United Kingdom	FALSE	FALSE		<p>Southern Africa</p>	1	0	0	0	0	0	0	1	1	0	1	#DIV/0!	1
380	Struthionidae	Struthio camelus australis	Southern ostrich	Europe	United Kingdom	FALSE	FALSE		<p>Southern Africa</p>	0	1	0	0	0	0	0	1	0	1	1	0:1	0
381	Struthionidae	Struthio camelus australis	Southern ostrich	North America	Canada	FALSE	FALSE		<p>Southern Africa</p>	0	2	0	0	0	0	0	2	0	2	2	0:1	0
382	Struthionidae	Struthio camelus australis	Southern ostrich	North America	Canada	FALSE	FALSE		<p>Southern Africa</p>	1	2	0	0	0	0	0	3	1	2	3	0.5:1	0.333333
383	Struthionidae	Struthio camelus australis	Southern ostrich	North America	Dominican Republic	FALSE	FALSE		<p>Southern Africa</p>	4	8	0	0	0	0	0	12	4	8	12	0.5:1	0.333333
384	Struthionidae	Struthio camelus australis	Southern ostrich	North America	Mexico	FALSE	FALSE		<p>Southern Africa</p>	1	0	0	0	0	0	0	1	1	0	1	#DIV/0!	1
385	Struthionidae	Struthio camelus australis	Southern ostrich	North America	United States	FALSE	FALSE		<p>Southern Africa</p>	1	0	0	0	0	0	0	1	1	0	1	#DIV/0!	1
386	Struthionidae	Struthio camelus molybdophanes	Somali ostrich	Asia	United Arab Emirates	FALSE	FALSE		<p>S Ethiopia to Somalia and adjacent ne Kenya</p>	0	1	0	0	0	0	0	1	0	1	1	0:1	0
388	Struthionidae	Struthio camelus molybdophanes	Somali ostrich	North America	United States	FALSE	FALSE		<p>S Ethiopia to Somalia and adjacent ne Kenya</p>	0	1	0	0	0	0	0	1	0	1	1	0:1	0
389	Struthionidae	Struthio camelus molybdophanes	Somali ostrich	North America	United States	FALSE	FALSE		<p>S Ethiopia to Somalia and adjacent ne Kenya</p>	0	1	0	0	0	0	0	1	0	1	1	0:1	0
390	Tinamidae	Tinamus solitarius	Solitary tinamou	Europe	Germany	FALSE			<p>E Brazil to se Paraguay and extreme ne Argentina (Misiones)</p>	0	1	0	0	0	0	0	1	0	1	1	0:1	0
391	Tinamidae	Tinamus solitarius	Solitary tinamou	Europe	Germany	FALSE			<p>E Brazil to se Paraguay and extreme ne Argentina (Misiones)</p>	11	15	6	15	0	0	0	32	11	15	26	0.7:1	0.423077
392	Tinamidae	Tinamus solitarius	Solitary tinamou	Europe	Poland	FALSE			<p>E Brazil to se Paraguay and extreme ne Argentina (Misiones)</p>	3	2	7	7	0	0	0	12	3	2	5	1.5:1	0.6
393	Tinamidae	Tinamus solitarius	Solitary tinamou	South America	Brazil	TRUE			<p>E Brazil to se Paraguay and extreme ne Argentina (Misiones)</p>	4	7	4	0	0	0	0	15	4	7	11	0.6:1	0.363636
394	Tinamidae	Tinamus solitarius	Solitary tinamou	South America	Brazil	TRUE			<p>E Brazil to se Paraguay and extreme ne Argentina (Misiones)</p>	0	1	0	0	0	0	0	1	0	1	1	0:1	0
395	Tinamidae	Tinamus solitarius	Solitary tinamou	South America	Brazil	TRUE			<p>E Brazil to se Paraguay and extreme ne Argentina (Misiones)</p>	1	0	0	0	0	0	0	1	1	0	1	#DIV/0!	1
396	Tinamidae	Tinamus solitarius	Solitary tinamou	South America	Brazil	TRUE			<p>E Brazil to se Paraguay and extreme ne Argentina (Misiones)</p>	4	1	0	0	0	0	0	5	4	1	5	4:1	0.8
397	Tinamidae	Tinamus major	Great tinamou	North America	United States	FALSE			S MEXICO-BRAZIL,BOLIVIA	5	5	3	0	0	0	0	13	5	5	10	1:1	0.5
398	Tinamidae	Tinamus major latifrons	Great tinamou	Asia	Malaysia	FALSE			<p>SW Colombia and w Ecuador</p>	1	1	0	0	0	0	0	2	1	1	2	1:1	0.5
399	Tinamidae	Crypturellus obsoletus	Brown tinamou	South America	Brazil	TRUE			VENEZUELA-NE ARGENTINA	1	2	0	0	0	0	0	3	1	2	3	0.5:1	0.333333
400	Tinamidae	Crypturellus obsoletus	Brown tinamou	South America	Brazil	TRUE			VENEZUELA-NE ARGENTINA	0	1	0	0	0	0	0	1	0	1	1	0:1	0
402	Tinamidae	Crypturellus tataupa	Tataupa tinamou	Europe	Czech Republic	FALSE			Amazon-north Argentina	1	1	0	0	0	0	0	2	1	1	2	1:1	0.5
403	Tinamidae	Crypturellus tataupa	Tataupa tinamou	Europe	Germany	FALSE			Amazon-north Argentina	2	0	0	0	0	0	0	2	2	0	2	#DIV/0!	1
404	Tinamidae	Crypturellus tataupa	Tataupa tinamou	Europe	Germany	FALSE			Amazon-north Argentina	5	0	0	0	0	0	0	5	5	0	5	#DIV/0!	1
406	Tinamidae	Crypturellus tataupa	Tataupa tinamou	Europe	Netherlands	FALSE			Amazon-north Argentina	1	1	0	0	0	0	0	2	1	1	2	1:1	0.5
407	Tinamidae	Crypturellus tataupa	Tataupa tinamou	Europe	Poland	FALSE			Amazon-north Argentina	1	1	0	0	0	0	0	2	1	1	2	1:1	0.5
409	Tinamidae	Rhynchotus rufescens	Red-winged tinamou	Europe	Portugal	FALSE			BRAZIL-BOLIVIA-ARGENTINA	2	0	0	0	0	0	0	2	2	0	2	#DIV/0!	1
410	Tinamidae	Rhynchotus rufescens	Red-winged tinamou	South America	Brazil	TRUE			BRAZIL-BOLIVIA-ARGENTINA	1	3	0	0	0	0	0	4	1	3	4	0.3:1	0.25
416	Tinamidae	Nothoprocta pentlandii	Andean tinamou	North America	United States	FALSE			Andes Mountains	1	0	0	0	0	0	0	1	1	0	1	#DIV/0!	1
417	Tinamidae	Nothoprocta pentlandii	Andean tinamou	North America	United States	FALSE			Andes Mountains	1	0	0	0	0	0	0	1	1	0	1	#DIV/0!	1
418	Tinamidae	Eudromia elegans	Elegant crested tinamou	Asia	Japan	FALSE			Argentina,Chile	4	0	1	0	0	0	0	5	4	0	4	#DIV/0!	1
419	Tinamidae	Eudromia elegans	Elegant crested tinamou	Asia	Japan	FALSE			Argentina,Chile	1	0	0	0	0	0	0	1	1	0	1	#DIV/0!	1
421	Tinamidae	Eudromia elegans	Elegant crested tinamou	Europe	Belgium	FALSE			Argentina,Chile	0	1	0	0	0	0	0	1	0	1	1	0:1	0
422	Tinamidae	Eudromia elegans	Elegant crested tinamou	Europe	Czech Republic	FALSE			Argentina,Chile	1	1	0	0	0	0	0	2	1	1	2	1:1	0.5
423	Tinamidae	Eudromia elegans	Elegant crested tinamou	Europe	Denmark	FALSE			Argentina,Chile	2	2	0	0	0	0	0	4	2	2	4	1:1	0.5
424	Tinamidae	Eudromia elegans	Elegant crested tinamou	Europe	France	FALSE			Argentina,Chile	1	1	0	0	0	0	0	2	1	1	2	1:1	0.5
425	Tinamidae	Eudromia elegans	Elegant crested tinamou	Europe	France	FALSE			Argentina,Chile	2	2	0	0	0	0	0	4	2	2	4	1:1	0.5
426	Tinamidae	Eudromia elegans	Elegant crested tinamou	Europe	Germany	FALSE			Argentina,Chile	5	3	0	3	0	0	0	8	5	3	8	1.7:1	0.625
427	Tinamidae	Eudromia elegans	Elegant crested tinamou	Europe	Germany	FALSE			Argentina,Chile	1	0	0	0	0	0	0	1	1	0	1	#DIV/0!	1
428	Tinamidae	Eudromia elegans	Elegant crested tinamou	Europe	Luxembourg	FALSE			Argentina,Chile	4	2	0	0	0	0	0	6	4	2	6	2:1	0.666667
429	Tinamidae	Eudromia elegans	Elegant crested tinamou	Europe	Netherlands	FALSE			Argentina,Chile	4	5	5	1	0	0	0	14	4	5	9	0.8:1	0.444444
430	Tinamidae	Eudromia elegans	Elegant crested tinamou	Europe	Poland	FALSE			Argentina,Chile	3	1	1	0	0	0	0	5	3	1	4	3:1	0.75
431	Tinamidae	Eudromia elegans	Elegant crested tinamou	Europe	United Kingdom	FALSE			Argentina,Chile	1	1	7	5	0	0	0	9	1	1	2	1:1	0.5
432	Tinamidae	Eudromia elegans	Elegant crested tinamou	Europe	United Kingdom	FALSE			Argentina,Chile	3	0	0	0	0	0	0	3	3	0	3	#DIV/0!	1
434	Tinamidae	Eudromia elegans	Elegant crested tinamou	North America	Canada	FALSE			Argentina,Chile	1	0	0	0	0	0	0	1	1	0	1	#DIV/0!	1
435	Tinamidae	Eudromia elegans	Elegant crested tinamou	North America	United States	FALSE			Argentina,Chile	2	0	0	0	0	0	0	2	2	0	2	#DIV/0!	1
436	Tinamidae	Eudromia elegans	Elegant crested tinamou	North America	United States	FALSE			Argentina,Chile	1	1	1	0	0	0	0	3	1	1	2	1:1	0.5
437	Tinamidae	Eudromia elegans	Elegant crested tinamou	North America	United States	FALSE			Argentina,Chile	2	0	0	0	0	0	0	2	2	0	2	#DIV/0!	1
438	Tinamidae	Eudromia elegans	Elegant crested tinamou	North America	United States	FALSE			Argentina,Chile	3	2	1	3	0	0	0	6	3	2	5	1.5:1	0.6
439	Tinamidae	Eudromia elegans elegans	Elegant crested tinamou	North America	United States	FALSE			CENTRAL ARGENTINA	2	4	0	0	0	0	0	6	2	4	6	0.5:1	0.333333
440	Tinamidae	Eudromia elegans elegans	Elegant crested tinamou	North America	United States	FALSE			CENTRAL ARGENTINA	1	0	0	0	0	0	0	1	1	0	1	#DIV/0!	1
445	Rheidae	Rhea americana	Greater rhea	Africa	South Africa	FALSE			BRAZIL-ARGENTINA	0	1	0	0	0	0	0	1	0	1	1	0:1	0
446	Rheidae	Rhea americana	Greater rhea	Africa	South Africa	FALSE			BRAZIL-ARGENTINA	2	0	0	0	0	0	0	2	2	0	2	#DIV/0!	1
447	Rheidae	Rhea americana	Greater rhea	Asia	Cyprus	FALSE			BRAZIL-ARGENTINA	1	0	0	0	0	0	0	1	1	0	1	#DIV/0!	1
448	Rheidae	Rhea americana	Greater rhea	Asia	India	FALSE			BRAZIL-ARGENTINA	0	0	0	0	1	2	0	3	1	2	3	0.5:1	0.333333
449	Rheidae	Rhea americana	Greater rhea	Asia	India	FALSE			BRAZIL-ARGENTINA	0	0	0	0	0	1	0	1	0	1	1	0:1	0
450	Rheidae	Rhea americana	Greater rhea	Asia	Israel	FALSE			BRAZIL-ARGENTINA	1	1	0	0	0	0	0	2	1	1	2	1:1	0.5
451	Rheidae	Rhea americana	Greater rhea	Asia	Israel	FALSE			BRAZIL-ARGENTINA	1	2	0	0	0	1	0	4	1	3	4	0.3:1	0.25
452	Rheidae	Rhea americana	Greater rhea	Asia	Thailand	FALSE			BRAZIL-ARGENTINA	1	1	0	0	0	0	0	2	1	1	2	1:1	0.5
453	Rheidae	Rhea americana	Greater rhea	Asia	Turkey	FALSE			BRAZIL-ARGENTINA	1	1	0	0	0	0	0	2	1	1	2	1:1	0.5
454	Rheidae	Rhea americana	Greater rhea	Asia	Turkey	FALSE			BRAZIL-ARGENTINA	4	3	1	1	0	0	0	8	4	3	7	1.3:1	0.571429
455	Rheidae	Rhea americana	Greater rhea	Asia	United Arab Emirates	FALSE			BRAZIL-ARGENTINA	1	0	0	0	0	0	0	1	1	0	1	#DIV/0!	1
457	Rheidae	Rhea americana	Greater rhea	Asia	United Arab Emirates	FALSE			BRAZIL-ARGENTINA	4	2	0	3	0	0	0	6	4	2	6	2:1	0.666667
458	Rheidae	Rhea americana	Greater rhea	Asia	United Arab Emirates	FALSE			BRAZIL-ARGENTINA	2	3	30	0	0	0	0	35	2	3	5	0.7:1	0.4
459	Rheidae	Rhea americana	Greater rhea	Europe	Austria	FALSE			BRAZIL-ARGENTINA	1	2	3	0	0	0	0	6	1	2	3	0.5:1	0.333333
460	Rheidae	Rhea americana	Greater rhea	Europe	Austria	FALSE			BRAZIL-ARGENTINA	1	3	0	0	0	0	0	4	1	3	4	0.3:1	0.25
461	Rheidae	Rhea americana	Greater rhea	Europe	Austria	FALSE			BRAZIL-ARGENTINA	1	2	0	0	0	0	0	3	1	2	3	0.5:1	0.333333
463	Rheidae	Rhea americana	Greater rhea	Europe	Austria	FALSE			BRAZIL-ARGENTINA	1	2	0	0	0	0	0	3	1	2	3	0.5:1	0.333333
465	Rheidae	Rhea americana	Greater rhea	Europe	Belgium	FALSE			BRAZIL-ARGENTINA	1	1	3	0	0	0	0	5	1	1	2	1:1	0.5
467	Rheidae	Rhea americana	Greater rhea	Europe	Belgium	FALSE			BRAZIL-ARGENTINA	2	2	0	0	0	0	0	4	2	2	4	1:1	0.5
468	Rheidae	Rhea americana	Greater rhea	Europe	Bulgaria	FALSE			BRAZIL-ARGENTINA	1	2	0	0	0	0	0	3	1	2	3	0.5:1	0.333333
469	Rheidae	Rhea americana	Greater rhea	Europe	Croatia	FALSE			BRAZIL-ARGENTINA	1	1	2	0	0	0	0	4	1	1	2	1:1	0.5
470	Rheidae	Rhea americana	Greater rhea	Europe	Czech Republic	FALSE			BRAZIL-ARGENTINA	1	2	0	0	0	0	0	3	1	2	3	0.5:1	0.333333
471	Rheidae	Rhea americana	Greater rhea	Europe	Czech Republic	FALSE			BRAZIL-ARGENTINA	1	1	0	0	0	0	0	2	1	1	2	1:1	0.5
472	Rheidae	Rhea americana	Greater rhea	Europe	Czech Republic	FALSE			BRAZIL-ARGENTINA	1	2	0	0	0	0	0	3	1	2	3	0.5:1	0.333333
474	Rheidae	Rhea americana	Greater rhea	Europe	Czech Republic	FALSE			BRAZIL-ARGENTINA	1	2	0	0	0	0	0	3	1	2	3	0.5:1	0.333333
475	Rheidae	Rhea americana	Greater rhea	Europe	Czech Republic	FALSE			BRAZIL-ARGENTINA	1	4	0	0	1	0	0	6	2	4	6	0.5:1	0.333333
476	Rheidae	Rhea americana	Greater rhea	Europe	Czech Republic	FALSE			BRAZIL-ARGENTINA	2	2	0	0	0	0	0	4	2	2	4	1:1	0.5
477	Rheidae	Rhea americana	Greater rhea	Europe	Denmark	FALSE			BRAZIL-ARGENTINA	1	2	4	0	0	0	0	7	1	2	3	0.5:1	0.333333
478	Rheidae	Rhea americana	Greater rhea	Europe	Denmark	FALSE			BRAZIL-ARGENTINA	1	2	0	0	0	0	0	3	1	2	3	0.5:1	0.333333
479	Rheidae	Rhea americana	Greater rhea	Europe	Denmark	FALSE			BRAZIL-ARGENTINA	1	2	0	0	0	0	0	3	1	2	3	0.5:1	0.333333
480	Rheidae	Rhea americana	Greater rhea	Europe	Denmark	FALSE			BRAZIL-ARGENTINA	1	1	0	0	0	0	0	2	1	1	2	1:1	0.5
481	Rheidae	Rhea americana	Greater rhea	Europe	Denmark	FALSE			BRAZIL-ARGENTINA	5	5	0	2	0	0	0	10	5	5	10	1:1	0.5
482	Rheidae	Rhea americana	Greater rhea	Europe	Denmark	FALSE			BRAZIL-ARGENTINA	1	2	0	0	0	0	0	3	1	2	3	0.5:1	0.333333
483	Rheidae	Rhea americana	Greater rhea	Europe	Denmark	FALSE			BRAZIL-ARGENTINA	2	3	0	0	0	0	0	5	2	3	5	0.7:1	0.4
484	Rheidae	Rhea americana	Greater rhea	Europe	Denmark	FALSE			BRAZIL-ARGENTINA	1	0	0	0	0	0	0	1	1	0	1	#DIV/0!	1
485	Rheidae	Rhea americana	Greater rhea	Europe	Denmark	FALSE			BRAZIL-ARGENTINA	0	2	0	0	0	0	0	2	0	2	2	0:1	0
486	Rheidae	Rhea americana	Greater rhea	Europe	Denmark	FALSE			BRAZIL-ARGENTINA	1	3	0	0	0	0	0	4	1	3	4	0.3:1	0.25
487	Rheidae	Rhea americana	Greater rhea	Europe	Estonia	FALSE			BRAZIL-ARGENTINA	1	0	0	0	0	0	0	1	1	0	1	#DIV/0!	1
488	Rheidae	Rhea americana	Greater rhea	Europe	France	FALSE			BRAZIL-ARGENTINA	4	4	10	0	0	0	0	18	4	4	8	1:1	0.5
489	Rheidae	Rhea americana	Greater rhea	Europe	France	FALSE			BRAZIL-ARGENTINA	1	1	0	0	0	0	0	2	1	1	2	1:1	0.5
490	Rheidae	Rhea americana	Greater rhea	Europe	France	FALSE			BRAZIL-ARGENTINA	3	2	0	0	0	0	0	5	3	2	5	1.5:1	0.6
491	Rheidae	Rhea americana	Greater rhea	Europe	France	FALSE			BRAZIL-ARGENTINA	0	3	0	0	0	0	0	3	0	3	3	0:1	0
493	Rheidae	Rhea americana	Greater rhea	Europe	France	FALSE			BRAZIL-ARGENTINA	0	1	0	0	0	0	0	1	0	1	1	0:1	0
494	Rheidae	Rhea americana	Greater rhea	Europe	France	FALSE			BRAZIL-ARGENTINA	2	0	2	0	0	0	0	4	2	0	2	#DIV/0!	1
495	Rheidae	Rhea americana	Greater rhea	Europe	France	FALSE			BRAZIL-ARGENTINA	0	1	4	0	0	0	0	5	0	1	1	0:1	0
497	Rheidae	Rhea americana	Greater rhea	Europe	France	FALSE			BRAZIL-ARGENTINA	0	2	0	0	0	1	0	3	0	3	3	0:1	0
498	Rheidae	Rhea americana	Greater rhea	Europe	France	FALSE			BRAZIL-ARGENTINA	1	0	3	0	0	0	0	4	1	0	1	#DIV/0!	1
499	Rheidae	Rhea americana	Greater rhea	Europe	France	FALSE			BRAZIL-ARGENTINA	1	1	0	0	0	0	0	2	1	1	2	1:1	0.5
500	Rheidae	Rhea americana	Greater rhea	Europe	France	FALSE			BRAZIL-ARGENTINA	3	0	0	0	0	0	0	3	3	0	3	#DIV/0!	1
501	Rheidae	Rhea americana	Greater rhea	Europe	France	FALSE			BRAZIL-ARGENTINA	4	2	3	0	0	0	0	9	4	2	6	2:1	0.666667
502	Rheidae	Rhea americana	Greater rhea	Europe	France	FALSE			BRAZIL-ARGENTINA	6	4	0	0	0	0	0	10	6	4	10	1.5:1	0.6
503	Rheidae	Rhea americana	Greater rhea	Europe	France	FALSE			BRAZIL-ARGENTINA	1	0	9	3	0	0	1	11	1	0	1	#DIV/0!	1
504	Rheidae	Rhea americana	Greater rhea	Europe	France	FALSE			BRAZIL-ARGENTINA	4	7	13	0	0	0	1	26	4	7	11	0.6:1	0.363636
505	Rheidae	Rhea americana	Greater rhea	Europe	France	FALSE			BRAZIL-ARGENTINA	2	2	1	0	0	0	1	6	2	2	4	1:1	0.5
506	Rheidae	Rhea americana	Greater rhea	Europe	France	FALSE			BRAZIL-ARGENTINA	2	2	2	2	0	0	0	6	2	2	4	1:1	0.5
507	Rheidae	Rhea americana	Greater rhea	Europe	France	FALSE			BRAZIL-ARGENTINA	1	1	0	0	0	0	0	2	1	1	2	1:1	0.5
508	Rheidae	Rhea americana	Greater rhea	Europe	France	FALSE			BRAZIL-ARGENTINA	4	1	1	0	0	0	0	6	4	1	5	4:1	0.8
509	Rheidae	Rhea americana	Greater rhea	Europe	France	FALSE			BRAZIL-ARGENTINA	2	1	0	0	0	0	0	3	2	1	3	2:1	0.666667
510	Rheidae	Rhea americana	Greater rhea	Europe	France	FALSE			BRAZIL-ARGENTINA	1	0	0	0	0	0	0	1	1	0	1	#DIV/0!	1
511	Rheidae	Rhea americana	Greater rhea	Europe	France	FALSE			BRAZIL-ARGENTINA	0	2	0	0	0	0	0	2	0	2	2	0:1	0
512	Rheidae	Rhea americana	Greater rhea	Europe	France	FALSE			BRAZIL-ARGENTINA	20	13	0	19	0	0	0	33	20	13	33	1.5:1	0.606061
514	Rheidae	Rhea americana	Greater rhea	Europe	France	FALSE			BRAZIL-ARGENTINA	0	2	0	0	0	0	0	2	0	2	2	0:1	0
515	Rheidae	Rhea americana	Greater rhea	Europe	France	FALSE			BRAZIL-ARGENTINA	1	1	0	0	0	0	0	2	1	1	2	1:1	0.5
516	Rheidae	Rhea americana	Greater rhea	Europe	Germany	FALSE			BRAZIL-ARGENTINA	1	4	0	0	0	0	0	5	1	4	5	0.3:1	0.2
517	Rheidae	Rhea americana	Greater rhea	Europe	Germany	FALSE			BRAZIL-ARGENTINA	1	3	0	0	0	0	0	4	1	3	4	0.3:1	0.25
518	Rheidae	Rhea americana	Greater rhea	Europe	Germany	FALSE			BRAZIL-ARGENTINA	1	4	0	0	0	0	0	5	1	4	5	0.3:1	0.2
519	Rheidae	Rhea americana	Greater rhea	Europe	Germany	FALSE			BRAZIL-ARGENTINA	1	3	0	0	0	0	0	4	1	3	4	0.3:1	0.25
520	Rheidae	Rhea americana	Greater rhea	Europe	Germany	FALSE			BRAZIL-ARGENTINA	1	2	0	0	0	0	0	3	1	2	3	0.5:1	0.333333
521	Rheidae	Rhea americana	Greater rhea	Europe	Germany	FALSE			BRAZIL-ARGENTINA	0	3	0	0	0	0	0	3	0	3	3	0:1	0
522	Rheidae	Rhea americana	Greater rhea	Europe	Germany	FALSE			BRAZIL-ARGENTINA	0	3	0	0	0	0	0	3	0	3	3	0:1	0
523	Rheidae	Rhea americana	Greater rhea	Europe	Germany	FALSE			BRAZIL-ARGENTINA	2	2	0	0	0	0	0	4	2	2	4	1:1	0.5
524	Rheidae	Rhea americana	Greater rhea	Europe	Germany	FALSE			BRAZIL-ARGENTINA	1	2	0	0	0	0	0	3	1	2	3	0.5:1	0.333333
525	Rheidae	Rhea americana	Greater rhea	Europe	Germany	FALSE			BRAZIL-ARGENTINA	7	9	3	0	0	0	0	19	7	9	16	0.8:1	0.4375
526	Rheidae	Rhea americana	Greater rhea	Europe	Germany	FALSE			BRAZIL-ARGENTINA	1	2	0	0	0	0	0	3	1	2	3	0.5:1	0.333333
527	Rheidae	Rhea americana	Greater rhea	Europe	Germany	FALSE			BRAZIL-ARGENTINA	2	1	0	0	0	0	0	3	2	1	3	2:1	0.666667
528	Rheidae	Rhea americana	Greater rhea	Europe	Germany	FALSE			BRAZIL-ARGENTINA	0	0	0	0	1	4	1	6	1	4	5	0.3:1	0.2
529	Rheidae	Rhea americana	Greater rhea	Europe	Germany	FALSE			BRAZIL-ARGENTINA	1	2	0	0	0	0	0	3	1	2	3	0.5:1	0.333333
530	Rheidae	Rhea americana	Greater rhea	Europe	Germany	FALSE			BRAZIL-ARGENTINA	4	6	0	3	0	0	0	10	4	6	10	0.7:1	0.4
531	Rheidae	Rhea americana	Greater rhea	Europe	Germany	FALSE			BRAZIL-ARGENTINA	1	2	0	0	0	0	0	3	1	2	3	0.5:1	0.333333
532	Rheidae	Rhea americana	Greater rhea	Europe	Germany	FALSE			BRAZIL-ARGENTINA	1	2	0	0	0	0	0	3	1	2	3	0.5:1	0.333333
533	Rheidae	Rhea americana	Greater rhea	Europe	Germany	FALSE			BRAZIL-ARGENTINA	2	2	0	0	0	0	0	4	2	2	4	1:1	0.5
534	Rheidae	Rhea americana	Greater rhea	Europe	Germany	FALSE			BRAZIL-ARGENTINA	2	1	0	0	0	0	0	3	2	1	3	2:1	0.666667
535	Rheidae	Rhea americana	Greater rhea	Europe	Germany	FALSE			BRAZIL-ARGENTINA	1	2	0	0	0	0	0	3	1	2	3	0.5:1	0.333333
536	Rheidae	Rhea americana	Greater rhea	Europe	Greece	FALSE			BRAZIL-ARGENTINA	2	1	6	4	0	0	0	9	2	1	3	2:1	0.666667
537	Rheidae	Rhea americana	Greater rhea	Europe	Hungary	FALSE			BRAZIL-ARGENTINA	1	0	0	0	0	0	0	1	1	0	1	#DIV/0!	1
538	Rheidae	Rhea americana	Greater rhea	Europe	Hungary	FALSE			BRAZIL-ARGENTINA	1	2	0	0	0	0	0	3	1	2	3	0.5:1	0.333333
539	Rheidae	Rhea americana	Greater rhea	Europe	Hungary	FALSE			BRAZIL-ARGENTINA	1	3	2	2	0	0	0	6	1	3	4	0.3:1	0.25
540	Rheidae	Rhea americana	Greater rhea	Europe	Hungary	FALSE			BRAZIL-ARGENTINA	3	4	1	1	0	0	0	8	3	4	7	0.8:1	0.428571
541	Rheidae	Rhea americana	Greater rhea	Europe	Hungary	FALSE			BRAZIL-ARGENTINA	0	2	0	0	0	0	0	2	0	2	2	0:1	0
543	Rheidae	Rhea americana	Greater rhea	Europe	Hungary	FALSE			BRAZIL-ARGENTINA	1	3	1	0	0	0	0	5	1	3	4	0.3:1	0.25
544	Rheidae	Rhea americana	Greater rhea	Europe	Ireland	FALSE			BRAZIL-ARGENTINA	1	0	0	0	0	0	0	1	1	0	1	#DIV/0!	1
545	Rheidae	Rhea americana	Greater rhea	Europe	Isle Of Man	FALSE			BRAZIL-ARGENTINA	7	0	0	0	0	0	0	7	7	0	7	#DIV/0!	1
546	Rheidae	Rhea americana	Greater rhea	Europe	Italy	FALSE			BRAZIL-ARGENTINA	1	0	0	0	0	0	0	1	1	0	1	#DIV/0!	1
547	Rheidae	Rhea americana	Greater rhea	Europe	Italy	FALSE			BRAZIL-ARGENTINA	2	2	0	2	0	0	0	4	2	2	4	1:1	0.5
548	Rheidae	Rhea americana	Greater rhea	Europe	Italy	FALSE			BRAZIL-ARGENTINA	1	2	0	0	0	0	0	3	1	2	3	0.5:1	0.333333
549	Rheidae	Rhea americana	Greater rhea	Europe	Italy	FALSE			BRAZIL-ARGENTINA	1	0	0	0	0	0	0	1	1	0	1	#DIV/0!	1
550	Rheidae	Rhea americana	Greater rhea	Europe	Italy	FALSE			BRAZIL-ARGENTINA	3	2	2	0	0	0	0	7	3	2	5	1.5:1	0.6
551	Rheidae	Rhea americana	Greater rhea	Europe	Italy	FALSE			BRAZIL-ARGENTINA	1	2	0	0	0	0	0	3	1	2	3	0.5:1	0.333333
552	Rheidae	Rhea americana	Greater rhea	Europe	Italy	FALSE			BRAZIL-ARGENTINA	0	2	3	0	0	0	0	5	0	2	2	0:1	0
553	Rheidae	Rhea americana	Greater rhea	Europe	Luxembourg	FALSE			BRAZIL-ARGENTINA	0	3	0	0	0	0	0	3	0	3	3	0:1	0
554	Rheidae	Rhea americana	Greater rhea	Europe	Netherlands	FALSE			BRAZIL-ARGENTINA	0	3	0	0	0	0	0	3	0	3	3	0:1	0
555	Rheidae	Rhea americana	Greater rhea	Europe	Netherlands	FALSE			BRAZIL-ARGENTINA	0	0	0	0	1	1	1	3	1	1	2	1:1	0.5
556	Rheidae	Rhea americana	Greater rhea	Europe	Netherlands	FALSE			BRAZIL-ARGENTINA	0	3	0	0	0	0	0	3	0	3	3	0:1	0
557	Rheidae	Rhea americana	Greater rhea	Europe	Netherlands	FALSE			BRAZIL-ARGENTINA	1	1	0	0	0	0	0	2	1	1	2	1:1	0.5
558	Rheidae	Rhea americana	Greater rhea	Europe	Netherlands	FALSE			BRAZIL-ARGENTINA	0	2	0	0	0	0	0	2	0	2	2	0:1	0
559	Rheidae	Rhea americana	Greater rhea	Europe	Netherlands	FALSE			BRAZIL-ARGENTINA	0	3	0	0	0	0	0	3	0	3	3	0:1	0
560	Rheidae	Rhea americana	Greater rhea	Europe	Norway	FALSE			BRAZIL-ARGENTINA	2	3	0	0	0	0	0	5	2	3	5	0.7:1	0.4
561	Rheidae	Rhea americana	Greater rhea	Europe	Poland	FALSE			BRAZIL-ARGENTINA	1	1	0	0	0	0	0	2	1	1	2	1:1	0.5
562	Rheidae	Rhea americana	Greater rhea	Europe	Poland	FALSE			BRAZIL-ARGENTINA	4	8	0	3	0	0	0	12	4	8	12	0.5:1	0.333333
563	Rheidae	Rhea americana	Greater rhea	Europe	Poland	FALSE			BRAZIL-ARGENTINA	2	1	3	1	0	0	0	6	2	1	3	2:1	0.666667
564	Rheidae	Rhea americana	Greater rhea	Europe	Poland	FALSE			BRAZIL-ARGENTINA	1	0	1	0	0	0	0	2	1	0	1	#DIV/0!	1
565	Rheidae	Rhea americana	Greater rhea	Europe	Poland	FALSE			BRAZIL-ARGENTINA	3	1	0	0	0	0	0	4	3	1	4	3:1	0.75
566	Rheidae	Rhea americana	Greater rhea	Europe	Poland	FALSE			BRAZIL-ARGENTINA	1	1	0	0	0	0	0	2	1	1	2	1:1	0.5
567	Rheidae	Rhea americana	Greater rhea	Europe	Poland	FALSE			BRAZIL-ARGENTINA	0	0	0	0	0	2	0	2	0	2	2	0:1	0
568	Rheidae	Rhea americana	Greater rhea	Europe	Poland	FALSE			BRAZIL-ARGENTINA	0	0	0	0	1	1	0	2	1	1	2	1:1	0.5
569	Rheidae	Rhea americana	Greater rhea	Europe	Portugal	FALSE			BRAZIL-ARGENTINA	2	0	1	0	0	0	0	3	2	0	2	#DIV/0!	1
570	Rheidae	Rhea americana	Greater rhea	Europe	Portugal	FALSE			BRAZIL-ARGENTINA	0	1	0	0	0	0	0	1	0	1	1	0:1	0
571	Rheidae	Rhea americana	Greater rhea	Europe	Romania	FALSE			BRAZIL-ARGENTINA	1	0	0	0	0	0	0	1	1	0	1	#DIV/0!	1
572	Rheidae	Rhea americana	Greater rhea	Europe	Russian Federation	FALSE			BRAZIL-ARGENTINA	0	0	0	0	4	1	0	5	4	1	5	4:1	0.8
574	Rheidae	Rhea americana	Greater rhea	Europe	Russian Federation	FALSE			BRAZIL-ARGENTINA	1	1	0	0	0	0	0	2	1	1	2	1:1	0.5
575	Rheidae	Rhea americana	Greater rhea	Europe	Russian Federation	FALSE			BRAZIL-ARGENTINA	2	3	6	5	0	0	0	11	2	3	5	0.7:1	0.4
576	Rheidae	Rhea americana	Greater rhea	Europe	Serbia	FALSE			BRAZIL-ARGENTINA	1	0	2	0	0	0	0	3	1	0	1	#DIV/0!	1
577	Rheidae	Rhea americana	Greater rhea	Europe	Slovakia	FALSE			BRAZIL-ARGENTINA	1	4	0	0	0	0	0	5	1	4	5	0.3:1	0.2
578	Rheidae	Rhea americana	Greater rhea	Europe	Slovakia	FALSE			BRAZIL-ARGENTINA	2	3	0	0	0	0	0	5	2	3	5	0.7:1	0.4
579	Rheidae	Rhea americana	Greater rhea	Europe	Slovakia	FALSE			BRAZIL-ARGENTINA	2	6	2	3	0	0	0	10	2	6	8	0.3:1	0.25
580	Rheidae	Rhea americana	Greater rhea	Europe	Slovenia	FALSE			BRAZIL-ARGENTINA	1	2	0	0	0	0	0	3	1	2	3	0.5:1	0.333333
581	Rheidae	Rhea americana	Greater rhea	Europe	Spain	FALSE			BRAZIL-ARGENTINA	2	2	0	0	0	0	0	4	2	2	4	1:1	0.5
582	Rheidae	Rhea americana	Greater rhea	Europe	Spain	FALSE			BRAZIL-ARGENTINA	1	1	1	0	0	0	0	3	1	1	2	1:1	0.5
583	Rheidae	Rhea americana	Greater rhea	Europe	Spain	FALSE			BRAZIL-ARGENTINA	1	1	0	0	0	0	0	2	1	1	2	1:1	0.5
584	Rheidae	Rhea americana	Greater rhea	Europe	Spain	FALSE			BRAZIL-ARGENTINA	2	0	0	0	0	0	0	2	2	0	2	#DIV/0!	1
585	Rheidae	Rhea americana	Greater rhea	Europe	Spain	FALSE			BRAZIL-ARGENTINA	1	0	0	0	0	0	0	1	1	0	1	#DIV/0!	1
587	Rheidae	Rhea americana	Greater rhea	Europe	Spain	FALSE			BRAZIL-ARGENTINA	1	0	0	0	0	0	0	1	1	0	1	#DIV/0!	1
588	Rheidae	Rhea americana	Greater rhea	Europe	Sweden	FALSE			BRAZIL-ARGENTINA	1	3	0	0	0	0	0	4	1	3	4	0.3:1	0.25
589	Rheidae	Rhea americana	Greater rhea	Europe	Sweden	FALSE			BRAZIL-ARGENTINA	2	1	0	0	0	0	0	3	2	1	3	2:1	0.666667
590	Rheidae	Rhea americana	Greater rhea	Europe	Ukraine	FALSE			BRAZIL-ARGENTINA	2	0	0	0	0	0	0	2	2	0	2	#DIV/0!	1
591	Rheidae	Rhea americana	Greater rhea	Europe	United Kingdom	FALSE			BRAZIL-ARGENTINA	1	1	0	0	0	0	0	2	1	1	2	1:1	0.5
592	Rheidae	Rhea americana	Greater rhea	Europe	United Kingdom	FALSE			BRAZIL-ARGENTINA	2	1	0	0	0	0	0	3	2	1	3	2:1	0.666667
593	Rheidae	Rhea americana	Greater rhea	Europe	United Kingdom	FALSE			BRAZIL-ARGENTINA	0	0	0	0	4	2	4	10	4	2	6	2:1	0.666667
594	Rheidae	Rhea americana	Greater rhea	Europe	United Kingdom	FALSE			BRAZIL-ARGENTINA	2	6	0	0	0	0	0	8	2	6	8	0.3:1	0.25
595	Rheidae	Rhea americana	Greater rhea	Europe	United Kingdom	FALSE			BRAZIL-ARGENTINA	0	2	5	5	0	0	3	10	0	2	2	0:1	0
596	Rheidae	Rhea americana	Greater rhea	Europe	United Kingdom	FALSE			BRAZIL-ARGENTINA	1	0	0	0	0	0	0	1	1	0	1	#DIV/0!	1
597	Rheidae	Rhea americana	Greater rhea	Europe	United Kingdom	FALSE			BRAZIL-ARGENTINA	1	2	0	0	0	0	0	3	1	2	3	0.5:1	0.333333
598	Rheidae	Rhea americana	Greater rhea	Europe	United Kingdom	FALSE			BRAZIL-ARGENTINA	1	1	0	0	0	0	0	2	1	1	2	1:1	0.5
599	Rheidae	Rhea americana	Greater rhea	Europe	United Kingdom	FALSE			BRAZIL-ARGENTINA	3	2	0	0	0	0	0	5	3	2	5	1.5:1	0.6
600	Rheidae	Rhea americana	Greater rhea	Europe	United Kingdom	FALSE			BRAZIL-ARGENTINA	2	1	0	0	0	0	0	3	2	1	3	2:1	0.666667
601	Rheidae	Rhea americana	Greater rhea	Europe	United Kingdom	FALSE			BRAZIL-ARGENTINA	1	1	0	0	0	0	0	2	1	1	2	1:1	0.5
602	Rheidae	Rhea americana	Greater rhea	Europe	United Kingdom	FALSE			BRAZIL-ARGENTINA	1	1	0	0	0	0	2	4	1	1	2	1:1	0.5
603	Rheidae	Rhea americana	Greater rhea	Europe	United Kingdom	FALSE			BRAZIL-ARGENTINA	1	2	0	0	0	0	0	3	1	2	3	0.5:1	0.333333
604	Rheidae	Rhea americana	Greater rhea	Europe	United Kingdom	FALSE			BRAZIL-ARGENTINA	0	1	0	0	0	0	0	1	0	1	1	0:1	0
605	Rheidae	Rhea americana	Greater rhea	Europe	United Kingdom	FALSE			BRAZIL-ARGENTINA	1	0	0	0	0	0	2	3	1	0	1	#DIV/0!	1
606	Rheidae	Rhea americana	Greater rhea	Europe	United Kingdom	FALSE			BRAZIL-ARGENTINA	6	5	0	0	0	0	0	11	6	5	11	1.2:1	0.545455
607	Rheidae	Rhea americana	Greater rhea	Europe	United Kingdom	FALSE			BRAZIL-ARGENTINA	1	2	0	0	0	0	0	3	1	2	3	0.5:1	0.333333
608	Rheidae	Rhea americana	Greater rhea	Europe	United Kingdom	FALSE			BRAZIL-ARGENTINA	1	1	0	0	0	0	0	2	1	1	2	1:1	0.5
609	Rheidae	Rhea americana	Greater rhea	Europe	United Kingdom	FALSE			BRAZIL-ARGENTINA	1	1	0	0	0	0	0	2	1	1	2	1:1	0.5
610	Rheidae	Rhea americana	Greater rhea	Europe	United Kingdom	FALSE			BRAZIL-ARGENTINA	1	1	4	1	0	0	0	6	1	1	2	1:1	0.5
611	Rheidae	Rhea americana	Greater rhea	Europe	United Kingdom	FALSE			BRAZIL-ARGENTINA	1	1	0	0	0	0	0	2	1	1	2	1:1	0.5
612	Rheidae	Rhea americana	Greater rhea	Europe	United Kingdom	FALSE			BRAZIL-ARGENTINA	1	0	0	0	0	0	0	1	1	0	1	#DIV/0!	1
614	Rheidae	Rhea americana	Greater rhea	Europe	United Kingdom	FALSE			BRAZIL-ARGENTINA	1	1	0	0	0	0	0	2	1	1	2	1:1	0.5
615	Rheidae	Rhea americana	Greater rhea	Europe	United Kingdom	FALSE			BRAZIL-ARGENTINA	1	3	0	0	0	0	0	4	1	3	4	0.3:1	0.25
616	Rheidae	Rhea americana	Greater rhea	Europe	United Kingdom	FALSE			BRAZIL-ARGENTINA	1	1	0	0	0	0	0	2	1	1	2	1:1	0.5
617	Rheidae	Rhea americana	Greater rhea	Europe	United Kingdom	FALSE			BRAZIL-ARGENTINA	0	2	0	0	0	0	0	2	0	2	2	0:1	0
618	Rheidae	Rhea americana	Greater rhea	Europe	United Kingdom	FALSE			BRAZIL-ARGENTINA	1	1	0	0	0	0	0	2	1	1	2	1:1	0.5
619	Rheidae	Rhea americana	Greater rhea	Europe	United Kingdom	FALSE			BRAZIL-ARGENTINA	2	2	0	0	0	0	0	4	2	2	4	1:1	0.5
620	Rheidae	Rhea americana	Greater rhea	Europe	United Kingdom	FALSE			BRAZIL-ARGENTINA	0	2	0	0	0	0	0	2	0	2	2	0:1	0
621	Rheidae	Rhea americana	Greater rhea	Europe	United Kingdom	FALSE			BRAZIL-ARGENTINA	1	1	0	0	0	0	0	2	1	1	2	1:1	0.5
623	Rheidae	Rhea americana	Greater rhea	North America	Canada	FALSE			BRAZIL-ARGENTINA	4	4	4	0	0	0	0	12	4	4	8	1:1	0.5
624	Rheidae	Rhea americana	Greater rhea	North America	Canada	FALSE			BRAZIL-ARGENTINA	0	3	0	0	0	0	0	3	0	3	3	0:1	0
625	Rheidae	Rhea americana	Greater rhea	North America	Guatemala	FALSE			BRAZIL-ARGENTINA	1	1	2	1	0	0	0	4	1	1	2	1:1	0.5
626	Rheidae	Rhea americana	Greater rhea	North America	Mexico	FALSE			BRAZIL-ARGENTINA	0	2	0	0	0	0	0	2	0	2	2	0:1	0
627	Rheidae	Rhea americana	Greater rhea	North America	Mexico	FALSE			BRAZIL-ARGENTINA	3	2	3	0	0	0	0	8	3	2	5	1.5:1	0.6
628	Rheidae	Rhea americana	Greater rhea	North America	United States	FALSE			BRAZIL-ARGENTINA	2	2	0	0	0	0	0	4	2	2	4	1:1	0.5
629	Rheidae	Rhea americana	Greater rhea	North America	United States	FALSE			BRAZIL-ARGENTINA	1	1	0	0	0	0	0	2	1	1	2	1:1	0.5
630	Rheidae	Rhea americana	Greater rhea	North America	United States	FALSE			BRAZIL-ARGENTINA	0	2	0	0	0	0	0	2	0	2	2	0:1	0
631	Rheidae	Rhea americana	Greater rhea	North America	United States	FALSE			BRAZIL-ARGENTINA	0	3	0	0	0	0	0	3	0	3	3	0:1	0
632	Rheidae	Rhea americana	Greater rhea	North America	United States	FALSE			BRAZIL-ARGENTINA	1	0	0	0	0	0	0	1	1	0	1	#DIV/0!	1
633	Rheidae	Rhea americana	Greater rhea	North America	United States	FALSE			BRAZIL-ARGENTINA	0	1	0	0	0	0	0	1	0	1	1	0:1	0
634	Rheidae	Rhea americana	Greater rhea	North America	United States	FALSE			BRAZIL-ARGENTINA	1	2	0	0	0	0	0	3	1	2	3	0.5:1	0.333333
635	Rheidae	Rhea americana	Greater rhea	North America	United States	FALSE			BRAZIL-ARGENTINA	1	0	0	0	0	0	0	1	1	0	1	#DIV/0!	1
636	Rheidae	Rhea americana	Greater rhea	North America	United States	FALSE			BRAZIL-ARGENTINA	1	0	0	0	0	0	0	1	1	0	1	#DIV/0!	1
637	Rheidae	Rhea americana	Greater rhea	North America	United States	FALSE			BRAZIL-ARGENTINA	1	1	0	0	0	0	0	2	1	1	2	1:1	0.5
638	Rheidae	Rhea americana	Greater rhea	North America	United States	FALSE			BRAZIL-ARGENTINA	1	1	0	0	0	0	0	2	1	1	2	1:1	0.5
639	Rheidae	Rhea americana	Greater rhea	North America	United States	FALSE			BRAZIL-ARGENTINA	1	4	0	0	0	5	0	10	1	9	10	0.1:1	0.1
640	Rheidae	Rhea americana	Greater rhea	North America	United States	FALSE			BRAZIL-ARGENTINA	0	1	0	0	6	0	45	52	6	1	7	6:1	0.857143
641	Rheidae	Rhea americana	Greater rhea	North America	United States	FALSE			BRAZIL-ARGENTINA	3	0	0	0	0	0	0	3	3	0	3	#DIV/0!	1
642	Rheidae	Rhea americana	Greater rhea	North America	United States	FALSE			BRAZIL-ARGENTINA	0	2	0	0	0	0	0	2	0	2	2	0:1	0
645	Rheidae	Rhea americana	Greater rhea	North America	United States	FALSE			BRAZIL-ARGENTINA	0	3	0	0	0	0	0	3	0	3	3	0:1	0
646	Rheidae	Rhea americana	Greater rhea	North America	United States	FALSE			BRAZIL-ARGENTINA	3	1	0	0	0	0	0	4	3	1	4	3:1	0.75
647	Rheidae	Rhea americana	Greater rhea	North America	United States	FALSE			BRAZIL-ARGENTINA	0	3	0	0	0	0	0	3	0	3	3	0:1	0
648	Rheidae	Rhea americana	Greater rhea	North America	United States	FALSE			BRAZIL-ARGENTINA	0	3	0	0	0	0	0	3	0	3	3	0:1	0
649	Rheidae	Rhea americana	Greater rhea	North America	United States	FALSE			BRAZIL-ARGENTINA	4	2	0	3	0	0	0	6	4	2	6	2:1	0.666667
650	Rheidae	Rhea americana	Greater rhea	North America	United States	FALSE			BRAZIL-ARGENTINA	0	1	0	0	0	0	0	1	0	1	1	0:1	0
651	Rheidae	Rhea americana	Greater rhea	North America	United States	FALSE			BRAZIL-ARGENTINA	1	1	0	0	0	0	0	2	1	1	2	1:1	0.5
652	Rheidae	Rhea americana	Greater rhea	North America	United States	FALSE			BRAZIL-ARGENTINA	1	2	0	0	0	0	0	3	1	2	3	0.5:1	0.333333
653	Rheidae	Rhea americana	Greater rhea	North America	United States	FALSE			BRAZIL-ARGENTINA	0	2	0	0	0	0	0	2	0	2	2	0:1	0
654	Rheidae	Rhea americana	Greater rhea	North America	United States	FALSE			BRAZIL-ARGENTINA	0	0	0	0	27	8	0	35	27	8	35	3.4:1	0.771429
655	Rheidae	Rhea americana	Greater rhea	North America	United States	FALSE			BRAZIL-ARGENTINA	2	4	0	0	0	0	0	6	2	4	6	0.5:1	0.333333
656	Rheidae	Rhea americana	Greater rhea	North America	United States	FALSE			BRAZIL-ARGENTINA	2	1	0	0	0	0	0	3	2	1	3	2:1	0.666667
657	Rheidae	Rhea americana	Greater rhea	North America	United States	FALSE			BRAZIL-ARGENTINA	3	1	1	0	0	0	0	5	3	1	4	3:1	0.75
658	Rheidae	Rhea americana	Greater rhea	North America	United States	FALSE			BRAZIL-ARGENTINA	3	5	0	0	0	0	10	18	3	5	8	0.6:1	0.375
659	Rheidae	Rhea americana	Greater rhea	South America	Argentina	TRUE			BRAZIL-ARGENTINA	2	2	0	0	0	0	0	4	2	2	4	1:1	0.5
660	Rheidae	Rhea americana	Greater rhea	South America	Argentina	TRUE			BRAZIL-ARGENTINA	3	1	0	0	0	0	0	4	3	1	4	3:1	0.75
661	Rheidae	Rhea americana	Greater rhea	South America	Brazil	TRUE			BRAZIL-ARGENTINA	2	3	2	0	0	0	0	7	2	3	5	0.7:1	0.4
662	Rheidae	Rhea americana	Greater rhea	South America	Brazil	TRUE			BRAZIL-ARGENTINA	1	2	0	0	0	0	0	3	1	2	3	0.5:1	0.333333
663	Rheidae	Rhea americana	Greater rhea	South America	Brazil	TRUE			BRAZIL-ARGENTINA	2	2	9	0	0	0	0	13	2	2	4	1:1	0.5
664	Rheidae	Rhea americana	Greater rhea	South America	Brazil	TRUE			BRAZIL-ARGENTINA	1	2	0	0	0	0	0	3	1	2	3	0.5:1	0.333333
665	Rheidae	Rhea americana	Greater rhea	South America	Brazil	TRUE			BRAZIL-ARGENTINA	1	1	1	0	0	0	0	3	1	1	2	1:1	0.5
666	Rheidae	Rhea americana	Greater rhea	South America	Chile	FALSE			BRAZIL-ARGENTINA	4	6	0	2	0	0	0	10	4	6	10	0.7:1	0.4
668	Rheidae	Rhea americana	Greater rhea	South America	Paraguay	TRUE			BRAZIL-ARGENTINA	1	1	8	0	0	0	0	10	1	1	2	1:1	0.5
669	Rheidae	Rhea americana americana	Greater rhea	Europe	France	FALSE			<p>Campos of n and e Brazil</p>	0	1	0	0	0	0	0	1	0	1	1	0:1	0
670	Rheidae	Rhea americana americana	Greater rhea	Europe	Romania	FALSE			<p>Campos of n and e Brazil</p>	1	0	0	0	0	0	0	1	1	0	1	#DIV/0!	1
671	Rheidae	Rhea americana americana	Greater rhea	Europe	United Kingdom	FALSE			<p>Campos of n and e Brazil</p>	0	1	0	0	0	0	0	1	0	1	1	0:1	0
672	Rheidae	Rhea americana americana	Greater rhea	Europe	United Kingdom	FALSE			<p>Campos of n and e Brazil</p>	0	1	0	0	0	0	0	1	0	1	1	0:1	0
673	Rheidae	Rhea americana americana	Greater rhea	Europe	United Kingdom	FALSE			<p>Campos of n and e Brazil</p>	1	3	0	0	0	0	0	4	1	3	4	0.3:1	0.25
674	Rheidae	Rhea americana intermedia	Greater rhea	Europe	Italy	FALSE			<p>Extreme se Brazil (Rio Grande do Sul) and Uruguay</p>	0	0	0	0	2	0	0	2	2	0	2	#DIV/0!	1
677	Rheidae	Rhea americana albescens	Greater rhea	Europe	United Kingdom	FALSE			<p>Plains of Argentina south to R&iacute;o Negro</p>	1	0	0	0	1	2	0	4	2	2	4	1:1	0.5
678	Rheidae	Rhea americana albescens	Greater rhea	North America	Dominican Republic	FALSE			<p>Plains of Argentina south to R&iacute;o Negro</p>	0	2	0	0	0	0	0	2	0	2	2	0:1	0
680	Rheidae	Rhea pennata	Lesser rhea	Europe	Czech Republic	FALSE			PATAGONIA-SOUTHERN PERU	1	0	0	0	0	0	0	1	1	0	1	#DIV/0!	1
681	Rheidae	Rhea pennata	Lesser rhea	Europe	Czech Republic	FALSE			PATAGONIA-SOUTHERN PERU	1	0	0	0	0	0	0	1	1	0	1	#DIV/0!	1
682	Rheidae	Rhea pennata	Lesser rhea	Europe	Czech Republic	FALSE			PATAGONIA-SOUTHERN PERU	1	1	0	0	0	0	0	2	1	1	2	1:1	0.5
683	Rheidae	Rhea pennata	Lesser rhea	Europe	Denmark	FALSE			PATAGONIA-SOUTHERN PERU	1	2	0	0	0	0	0	3	1	2	3	0.5:1	0.333333
684	Rheidae	Rhea pennata	Lesser rhea	Europe	Denmark	FALSE			PATAGONIA-SOUTHERN PERU	2	2	0	0	0	0	0	4	2	2	4	1:1	0.5
686	Rheidae	Rhea pennata	Lesser rhea	Europe	Denmark	FALSE			PATAGONIA-SOUTHERN PERU	1	0	0	0	0	0	0	1	1	0	1	#DIV/0!	1
687	Rheidae	Rhea pennata	Lesser rhea	Europe	Denmark	FALSE			PATAGONIA-SOUTHERN PERU	1	1	0	0	0	0	0	2	1	1	2	1:1	0.5
688	Rheidae	Rhea pennata	Lesser rhea	Europe	France	FALSE			PATAGONIA-SOUTHERN PERU	1	2	0	0	0	0	0	3	1	2	3	0.5:1	0.333333
689	Rheidae	Rhea pennata	Lesser rhea	Europe	France	FALSE			PATAGONIA-SOUTHERN PERU	0	1	0	0	0	0	0	1	0	1	1	0:1	0
690	Rheidae	Rhea pennata	Lesser rhea	Europe	France	FALSE			PATAGONIA-SOUTHERN PERU	0	3	0	0	0	0	0	3	0	3	3	0:1	0
691	Rheidae	Rhea pennata	Lesser rhea	Europe	France	FALSE			PATAGONIA-SOUTHERN PERU	2	0	0	0	0	0	0	2	2	0	2	#DIV/0!	1
692	Rheidae	Rhea pennata	Lesser rhea	Europe	France	FALSE			PATAGONIA-SOUTHERN PERU	1	3	0	0	0	0	0	4	1	3	4	0.3:1	0.25
693	Rheidae	Rhea pennata	Lesser rhea	Europe	France	FALSE			PATAGONIA-SOUTHERN PERU	1	0	0	0	0	0	0	1	1	0	1	#DIV/0!	1
694	Rheidae	Rhea pennata	Lesser rhea	Europe	France	FALSE			PATAGONIA-SOUTHERN PERU	1	1	0	0	0	0	0	2	1	1	2	1:1	0.5
695	Rheidae	Rhea pennata	Lesser rhea	Europe	France	FALSE			PATAGONIA-SOUTHERN PERU	3	0	0	0	0	0	0	3	3	0	3	#DIV/0!	1
696	Rheidae	Rhea pennata	Lesser rhea	Europe	France	FALSE			PATAGONIA-SOUTHERN PERU	4	1	0	4	0	0	0	5	4	1	5	4:1	0.8
697	Rheidae	Rhea pennata	Lesser rhea	Europe	France	FALSE			PATAGONIA-SOUTHERN PERU	3	2	0	0	0	0	0	5	3	2	5	1.5:1	0.6
698	Rheidae	Rhea pennata	Lesser rhea	Europe	Germany	FALSE			PATAGONIA-SOUTHERN PERU	0	3	0	0	0	0	0	3	0	3	3	0:1	0
699	Rheidae	Rhea pennata	Lesser rhea	Europe	Germany	FALSE			PATAGONIA-SOUTHERN PERU	0	1	0	0	0	0	0	1	0	1	1	0:1	0
700	Rheidae	Rhea pennata	Lesser rhea	Europe	Germany	FALSE			PATAGONIA-SOUTHERN PERU	1	2	0	1	0	0	0	3	1	2	3	0.5:1	0.333333
701	Rheidae	Rhea pennata	Lesser rhea	Europe	Germany	FALSE			PATAGONIA-SOUTHERN PERU	2	3	0	1	0	0	0	5	2	3	5	0.7:1	0.4
702	Rheidae	Rhea pennata	Lesser rhea	Europe	Germany	FALSE			PATAGONIA-SOUTHERN PERU	1	1	0	0	0	0	0	2	1	1	2	1:1	0.5
703	Rheidae	Rhea pennata	Lesser rhea	Europe	Germany	FALSE			PATAGONIA-SOUTHERN PERU	0	1	0	0	0	0	0	1	0	1	1	0:1	0
704	Rheidae	Rhea pennata	Lesser rhea	Europe	Germany	FALSE			PATAGONIA-SOUTHERN PERU	1	2	0	0	0	0	0	3	1	2	3	0.5:1	0.333333
705	Rheidae	Rhea pennata	Lesser rhea	Europe	Germany	FALSE			PATAGONIA-SOUTHERN PERU	2	2	0	0	0	0	0	4	2	2	4	1:1	0.5
706	Rheidae	Rhea pennata	Lesser rhea	Europe	Germany	FALSE			PATAGONIA-SOUTHERN PERU	1	1	0	0	0	0	0	2	1	1	2	1:1	0.5
707	Rheidae	Rhea pennata	Lesser rhea	Europe	Germany	FALSE			PATAGONIA-SOUTHERN PERU	1	3	0	0	0	0	0	4	1	3	4	0.3:1	0.25
708	Rheidae	Rhea pennata	Lesser rhea	Europe	Hungary	FALSE			PATAGONIA-SOUTHERN PERU	0	1	0	0	0	0	0	1	0	1	1	0:1	0
709	Rheidae	Rhea pennata	Lesser rhea	Europe	Ireland	FALSE			PATAGONIA-SOUTHERN PERU	2	0	0	0	0	0	0	2	2	0	2	#DIV/0!	1
710	Rheidae	Rhea pennata	Lesser rhea	Europe	Italy	FALSE			PATAGONIA-SOUTHERN PERU	1	1	0	0	0	0	0	2	1	1	2	1:1	0.5
711	Rheidae	Rhea pennata	Lesser rhea	Europe	Latvia	FALSE			PATAGONIA-SOUTHERN PERU	4	3	0	0	0	0	0	7	4	3	7	1.3:1	0.571429
712	Rheidae	Rhea pennata	Lesser rhea	Europe	Netherlands	FALSE			PATAGONIA-SOUTHERN PERU	1	2	0	0	0	0	0	3	1	2	3	0.5:1	0.333333
713	Rheidae	Rhea pennata	Lesser rhea	Europe	Netherlands	FALSE			PATAGONIA-SOUTHERN PERU	0	2	0	0	0	0	0	2	0	2	2	0:1	0
714	Rheidae	Rhea pennata	Lesser rhea	Europe	Netherlands	FALSE			PATAGONIA-SOUTHERN PERU	1	2	0	0	0	0	0	3	1	2	3	0.5:1	0.333333
715	Rheidae	Rhea pennata	Lesser rhea	Europe	Netherlands	FALSE			PATAGONIA-SOUTHERN PERU	1	1	0	0	0	0	0	2	1	1	2	1:1	0.5
716	Rheidae	Rhea pennata	Lesser rhea	Europe	Netherlands	FALSE			PATAGONIA-SOUTHERN PERU	1	2	0	0	0	0	0	3	1	2	3	0.5:1	0.333333
717	Rheidae	Rhea pennata	Lesser rhea	Europe	Netherlands	FALSE			PATAGONIA-SOUTHERN PERU	0	1	0	0	0	0	0	1	0	1	1	0:1	0
718	Rheidae	Rhea pennata	Lesser rhea	Europe	Poland	FALSE			PATAGONIA-SOUTHERN PERU	0	1	5	5	0	0	0	6	0	1	1	0:1	0
719	Rheidae	Rhea pennata	Lesser rhea	Europe	Poland	FALSE			PATAGONIA-SOUTHERN PERU	1	1	1	1	0	0	0	3	1	1	2	1:1	0.5
720	Rheidae	Rhea pennata	Lesser rhea	Europe	Portugal	FALSE			PATAGONIA-SOUTHERN PERU	1	1	0	0	0	0	0	2	1	1	2	1:1	0.5
721	Rheidae	Rhea pennata	Lesser rhea	Europe	Spain	FALSE			PATAGONIA-SOUTHERN PERU	0	1	0	0	0	0	0	1	0	1	1	0:1	0
722	Rheidae	Rhea pennata	Lesser rhea	Europe	Sweden	FALSE			PATAGONIA-SOUTHERN PERU	1	1	0	0	0	0	0	2	1	1	2	1:1	0.5
723	Rheidae	Rhea pennata	Lesser rhea	Europe	Switzerland	FALSE			PATAGONIA-SOUTHERN PERU	1	1	0	0	0	0	0	2	1	1	2	1:1	0.5
724	Rheidae	Rhea pennata	Lesser rhea	Europe	United Kingdom	FALSE			PATAGONIA-SOUTHERN PERU	2	1	0	0	0	0	0	3	2	1	3	2:1	0.666667
725	Rheidae	Rhea pennata	Lesser rhea	Europe	United Kingdom	FALSE			PATAGONIA-SOUTHERN PERU	1	1	0	0	0	0	0	2	1	1	2	1:1	0.5
726	Rheidae	Rhea pennata	Lesser rhea	Europe	United Kingdom	FALSE			PATAGONIA-SOUTHERN PERU	1	2	0	0	0	0	0	3	1	2	3	0.5:1	0.333333
727	Rheidae	Rhea pennata	Lesser rhea	Europe	United Kingdom	FALSE			PATAGONIA-SOUTHERN PERU	1	0	0	0	0	0	0	1	1	0	1	#DIV/0!	1
728	Rheidae	Rhea pennata	Lesser rhea	Europe	United Kingdom	FALSE			PATAGONIA-SOUTHERN PERU	2	0	0	0	0	0	0	2	2	0	2	#DIV/0!	1
729	Rheidae	Rhea pennata	Lesser rhea	Europe	United Kingdom	FALSE			PATAGONIA-SOUTHERN PERU	0	1	0	0	0	0	0	1	0	1	1	0:1	0
730	Rheidae	Rhea pennata	Lesser rhea	Europe	United Kingdom	FALSE			PATAGONIA-SOUTHERN PERU	1	0	0	0	0	0	0	1	1	0	1	#DIV/0!	1
731	Rheidae	Rhea pennata	Lesser rhea	South America	Argentina	TRUE			PATAGONIA-SOUTHERN PERU	0	1	0	0	0	0	0	1	0	1	1	0:1	0
732	Rheidae	Rhea pennata	Lesser rhea	South America	Chile	TRUE			PATAGONIA-SOUTHERN PERU	1	3	0	0	0	0	0	4	1	3	4	0.3:1	0.25
733	Rheidae	Rhea pennata	Lesser rhea	South America	Chile	TRUE			PATAGONIA-SOUTHERN PERU	0	1	0	0	0	0	0	1	0	1	1	0:1	0
750	Casuariidae	Casuarius casuarius	Southern cassowary	Asia	Cyprus	FALSE			Australia,New Guinea	0	2	0	0	0	0	0	2	0	2	2	0:1	0
751	Casuariidae	Casuarius casuarius	Southern cassowary	Asia	Indonesia	FALSE			Australia,New Guinea	5	4	4	0	0	0	0	13	5	4	9	1.3:1	0.555556
752	Casuariidae	Casuarius casuarius	Southern cassowary	Asia	Israel	FALSE			Australia,New Guinea	2	0	0	0	0	0	0	2	2	0	2	#DIV/0!	1
753	Casuariidae	Casuarius casuarius	Southern cassowary	Asia	Israel	FALSE			Australia,New Guinea	1	0	0	0	0	0	0	1	1	0	1	#DIV/0!	1
754	Casuariidae	Casuarius casuarius	Southern cassowary	Asia	Israel	FALSE			Australia,New Guinea	1	0	0	0	0	0	0	1	1	0	1	#DIV/0!	1
755	Casuariidae	Casuarius casuarius	Southern cassowary	Asia	Israel	FALSE			Australia,New Guinea	1	1	0	0	0	0	0	2	1	1	2	1:1	0.5
756	Casuariidae	Casuarius casuarius	Southern cassowary	Asia	Korea, Republic Of	FALSE			Australia,New Guinea	2	1	0	0	0	0	0	3	2	1	3	2:1	0.666667
758	Casuariidae	Casuarius casuarius	Southern cassowary	Asia	Singapore	FALSE			Australia,New Guinea	1	3	0	0	0	0	0	4	1	3	4	0.3:1	0.25
759	Casuariidae	Casuarius casuarius	Southern cassowary	Asia	Singapore	FALSE			Australia,New Guinea	1	0	0	0	0	0	0	1	1	0	1	#DIV/0!	1
760	Casuariidae	Casuarius casuarius	Southern cassowary	Asia	Sri Lanka	FALSE			Australia,New Guinea	2	1	0	0	0	0	0	3	2	1	3	2:1	0.666667
761	Casuariidae	Casuarius casuarius	Southern cassowary	Asia	Taiwan	FALSE			Australia,New Guinea	0	1	0	0	0	0	0	1	0	1	1	0:1	0
762	Casuariidae	Casuarius casuarius	Southern cassowary	Asia	Thailand	FALSE			Australia,New Guinea	0	2	0	0	0	0	0	2	0	2	2	0:1	0
763	Casuariidae	Casuarius casuarius	Southern cassowary	Asia	Thailand	FALSE			Australia,New Guinea	1	0	0	0	0	0	0	1	1	0	1	#DIV/0!	1
764	Casuariidae	Casuarius casuarius	Southern cassowary	Asia	Thailand	FALSE			Australia,New Guinea	0	3	4	1	0	0	0	7	0	3	3	0:1	0
765	Casuariidae	Casuarius casuarius	Southern cassowary	Asia	Thailand	FALSE			Australia,New Guinea	1	0	0	0	0	0	0	1	1	0	1	#DIV/0!	1
766	Casuariidae	Casuarius casuarius	Southern cassowary	Asia	United Arab Emirates	FALSE			Australia,New Guinea	3	0	0	0	0	0	0	3	3	0	3	#DIV/0!	1
767	Casuariidae	Casuarius casuarius	Southern cassowary	Asia	Uzbekistan	FALSE			Australia,New Guinea	1	0	1	0	0	0	0	2	1	0	1	#DIV/0!	1
768	Casuariidae	Casuarius casuarius	Southern cassowary	Australia (Oceania)	Australia				Australia,New Guinea	1	1	1	0	0	0	0	3	1	1	2	1:1	0.5
769	Casuariidae	Casuarius casuarius	Southern cassowary	Australia (Oceania)	Australia				Australia,New Guinea	1	0	0	0	0	0	0	1	1	0	1	#DIV/0!	1
770	Casuariidae	Casuarius casuarius	Southern cassowary	Australia (Oceania)	Australia				Australia,New Guinea	1	1	0	0	0	0	0	2	1	1	2	1:1	0.5
771	Casuariidae	Casuarius casuarius	Southern cassowary	Australia (Oceania)	Australia				Australia,New Guinea	1	0	0	0	0	0	0	1	1	0	1	#DIV/0!	1
772	Casuariidae	Casuarius casuarius	Southern cassowary	Australia (Oceania)	Australia				Australia,New Guinea	0	1	0	0	0	0	0	1	0	1	1	0:1	0
773	Casuariidae	Casuarius casuarius	Southern cassowary	Australia (Oceania)	Australia				Australia,New Guinea	1	1	0	0	0	0	0	2	1	1	2	1:1	0.5
774	Casuariidae	Casuarius casuarius	Southern cassowary	Australia (Oceania)	Australia				Australia,New Guinea	1	0	0	0	0	0	0	1	1	0	1	#DIV/0!	1
775	Casuariidae	Casuarius casuarius	Southern cassowary	Australia (Oceania)	Papua New Guinea				Australia,New Guinea	3	0	1	0	0	0	0	4	3	0	3	#DIV/0!	1
776	Casuariidae	Casuarius casuarius	Southern cassowary	Europe	Austria	FALSE			Australia,New Guinea	1	1	0	0	0	0	0	2	1	1	2	1:1	0.5
777	Casuariidae	Casuarius casuarius	Southern cassowary	Europe	Belgium	FALSE			Australia,New Guinea	2	1	0	0	0	0	0	3	2	1	3	2:1	0.666667
778	Casuariidae	Casuarius casuarius	Southern cassowary	Europe	Belgium	FALSE			Australia,New Guinea	1	1	0	0	0	0	0	2	1	1	2	1:1	0.5
779	Casuariidae	Casuarius casuarius	Southern cassowary	Europe	Czech Republic	FALSE			Australia,New Guinea	1	1	0	0	0	0	0	2	1	1	2	1:1	0.5
780	Casuariidae	Casuarius casuarius	Southern cassowary	Europe	Czech Republic	FALSE			Australia,New Guinea	1	1	0	0	0	0	0	2	1	1	2	1:1	0.5
781	Casuariidae	Casuarius casuarius	Southern cassowary	Europe	Czech Republic	FALSE			Australia,New Guinea	1	1	0	0	0	0	0	2	1	1	2	1:1	0.5
782	Casuariidae	Casuarius casuarius	Southern cassowary	Europe	France	FALSE			Australia,New Guinea	0	1	0	0	0	0	0	1	0	1	1	0:1	0
783	Casuariidae	Casuarius casuarius	Southern cassowary	Europe	France	FALSE			Australia,New Guinea	1	1	0	0	0	0	0	2	1	1	2	1:1	0.5
784	Casuariidae	Casuarius casuarius	Southern cassowary	Europe	France	FALSE			Australia,New Guinea	1	1	0	0	0	0	0	2	1	1	2	1:1	0.5
785	Casuariidae	Casuarius casuarius	Southern cassowary	Europe	France	FALSE			Australia,New Guinea	1	1	0	0	0	0	0	2	1	1	2	1:1	0.5
786	Casuariidae	Casuarius casuarius	Southern cassowary	Europe	France	FALSE			Australia,New Guinea	2	1	0	0	0	0	0	3	2	1	3	2:1	0.666667
787	Casuariidae	Casuarius casuarius	Southern cassowary	Europe	France	FALSE			Australia,New Guinea	1	0	0	0	0	0	0	1	1	0	1	#DIV/0!	1
788	Casuariidae	Casuarius casuarius	Southern cassowary	Europe	France	FALSE			Australia,New Guinea	1	1	0	0	0	0	0	2	1	1	2	1:1	0.5
789	Casuariidae	Casuarius casuarius	Southern cassowary	Europe	France	FALSE			Australia,New Guinea	1	1	0	0	0	0	0	2	1	1	2	1:1	0.5
790	Casuariidae	Casuarius casuarius	Southern cassowary	Europe	France	FALSE			Australia,New Guinea	1	1	0	0	0	0	0	2	1	1	2	1:1	0.5
791	Casuariidae	Casuarius casuarius	Southern cassowary	Europe	Germany	FALSE			Australia,New Guinea	1	0	0	0	0	0	0	1	1	0	1	#DIV/0!	1
792	Casuariidae	Casuarius casuarius	Southern cassowary	Europe	Germany	FALSE			Australia,New Guinea	1	1	0	0	0	0	0	2	1	1	2	1:1	0.5
793	Casuariidae	Casuarius casuarius	Southern cassowary	Europe	Germany	FALSE			Australia,New Guinea	1	1	0	0	0	0	0	2	1	1	2	1:1	0.5
794	Casuariidae	Casuarius casuarius	Southern cassowary	Europe	Germany	FALSE			Australia,New Guinea	1	0	0	0	0	0	0	1	1	0	1	#DIV/0!	1
795	Casuariidae	Casuarius casuarius	Southern cassowary	Europe	Germany	FALSE			Australia,New Guinea	1	1	1	1	0	0	0	3	1	1	2	1:1	0.5
796	Casuariidae	Casuarius casuarius	Southern cassowary	Europe	Germany	FALSE			Australia,New Guinea	1	1	0	0	0	0	0	2	1	1	2	1:1	0.5
797	Casuariidae	Casuarius casuarius	Southern cassowary	Europe	Germany	FALSE			Australia,New Guinea	1	0	0	0	0	0	0	1	1	0	1	#DIV/0!	1
798	Casuariidae	Casuarius casuarius	Southern cassowary	Europe	Greece	FALSE			Australia,New Guinea	1	1	0	0	0	0	0	2	1	1	2	1:1	0.5
799	Casuariidae	Casuarius casuarius	Southern cassowary	Europe	Hungary	FALSE			Australia,New Guinea	1	1	0	0	0	0	0	2	1	1	2	1:1	0.5
800	Casuariidae	Casuarius casuarius	Southern cassowary	Europe	Hungary	FALSE			Australia,New Guinea	1	0	0	0	0	0	0	1	1	0	1	#DIV/0!	1
801	Casuariidae	Casuarius casuarius	Southern cassowary	Europe	Hungary	FALSE			Australia,New Guinea	1	0	0	0	0	0	0	1	1	0	1	#DIV/0!	1
802	Casuariidae	Casuarius casuarius	Southern cassowary	Europe	Italy	FALSE			Australia,New Guinea	1	1	0	0	0	0	0	2	1	1	2	1:1	0.5
803	Casuariidae	Casuarius casuarius	Southern cassowary	Europe	Italy	FALSE			Australia,New Guinea	0	1	0	0	0	0	0	1	0	1	1	0:1	0
804	Casuariidae	Casuarius casuarius	Southern cassowary	Europe	Italy	FALSE			Australia,New Guinea	1	1	0	0	0	0	0	2	1	1	2	1:1	0.5
805	Casuariidae	Casuarius casuarius	Southern cassowary	Europe	Latvia	FALSE			Australia,New Guinea	1	1	0	0	0	0	0	2	1	1	2	1:1	0.5
806	Casuariidae	Casuarius casuarius	Southern cassowary	Europe	Netherlands	FALSE			Australia,New Guinea	1	1	0	0	0	0	0	2	1	1	2	1:1	0.5
807	Casuariidae	Casuarius casuarius	Southern cassowary	Europe	Netherlands	FALSE			Australia,New Guinea	1	1	0	0	0	0	0	2	1	1	2	1:1	0.5
808	Casuariidae	Casuarius casuarius	Southern cassowary	Europe	Poland	FALSE			Australia,New Guinea	0	2	0	0	0	0	0	2	0	2	2	0:1	0
809	Casuariidae	Casuarius casuarius	Southern cassowary	Europe	Poland	FALSE			Australia,New Guinea	0	1	0	0	0	0	0	1	0	1	1	0:1	0
810	Casuariidae	Casuarius casuarius	Southern cassowary	Europe	Poland	FALSE			Australia,New Guinea	1	1	0	0	0	0	0	2	1	1	2	1:1	0.5
811	Casuariidae	Casuarius casuarius	Southern cassowary	Europe	Poland	FALSE			Australia,New Guinea	0	1	0	0	0	0	0	1	0	1	1	0:1	0
812	Casuariidae	Casuarius casuarius	Southern cassowary	Europe	Portugal	FALSE			Australia,New Guinea	0	1	0	0	0	0	0	1	0	1	1	0:1	0
813	Casuariidae	Casuarius casuarius	Southern cassowary	Europe	Portugal	FALSE			Australia,New Guinea	3	2	1	1	0	0	0	6	3	2	5	1.5:1	0.6
814	Casuariidae	Casuarius casuarius	Southern cassowary	Europe	Russian Federation	FALSE			Australia,New Guinea	1	1	0	0	0	0	0	2	1	1	2	1:1	0.5
815	Casuariidae	Casuarius casuarius	Southern cassowary	Europe	Russian Federation	FALSE			Australia,New Guinea	0	1	0	0	0	0	0	1	0	1	1	0:1	0
816	Casuariidae	Casuarius casuarius	Southern cassowary	Europe	Russian Federation	FALSE			Australia,New Guinea	2	1	0	0	0	0	0	3	2	1	3	2:1	0.666667
818	Casuariidae	Casuarius casuarius	Southern cassowary	Europe	Slovakia	FALSE			Australia,New Guinea	1	1	0	0	0	0	0	2	1	1	2	1:1	0.5
819	Casuariidae	Casuarius casuarius	Southern cassowary	Europe	Spain	FALSE			Australia,New Guinea	1	0	0	0	0	0	0	1	1	0	1	#DIV/0!	1
820	Casuariidae	Casuarius casuarius	Southern cassowary	Europe	Spain	FALSE			Australia,New Guinea	2	1	0	0	0	0	0	3	2	1	3	2:1	0.666667
821	Casuariidae	Casuarius casuarius	Southern cassowary	Europe	Spain	FALSE			Australia,New Guinea	1	1	0	0	0	0	0	2	1	1	2	1:1	0.5
822	Casuariidae	Casuarius casuarius	Southern cassowary	Europe	Spain	FALSE			Australia,New Guinea	1	1	0	0	0	0	0	2	1	1	2	1:1	0.5
823	Casuariidae	Casuarius casuarius	Southern cassowary	Europe	Spain	FALSE			Australia,New Guinea	1	1	0	0	0	0	0	2	1	1	2	1:1	0.5
824	Casuariidae	Casuarius casuarius	Southern cassowary	Europe	United Kingdom	FALSE			Australia,New Guinea	1	1	0	0	0	0	0	2	1	1	2	1:1	0.5
825	Casuariidae	Casuarius casuarius	Southern cassowary	Europe	United Kingdom	FALSE			Australia,New Guinea	1	0	0	0	0	0	0	1	1	0	1	#DIV/0!	1
826	Casuariidae	Casuarius casuarius	Southern cassowary	Europe	United Kingdom	FALSE			Australia,New Guinea	1	1	0	0	0	0	0	2	1	1	2	1:1	0.5
827	Casuariidae	Casuarius casuarius	Southern cassowary	Europe	United Kingdom	FALSE			Australia,New Guinea	1	0	0	0	0	0	0	1	1	0	1	#DIV/0!	1
828	Casuariidae	Casuarius casuarius	Southern cassowary	Europe	United Kingdom	FALSE			Australia,New Guinea	1	1	0	0	0	0	0	2	1	1	2	1:1	0.5
829	Casuariidae	Casuarius casuarius	Southern cassowary	Europe	United Kingdom	FALSE			Australia,New Guinea	1	2	0	0	0	0	0	3	1	2	3	0.5:1	0.333333
830	Casuariidae	Casuarius casuarius	Southern cassowary	Europe	United Kingdom	FALSE			Australia,New Guinea	1	1	0	0	0	0	0	2	1	1	2	1:1	0.5
831	Casuariidae	Casuarius casuarius	Southern cassowary	North America	Dominican Republic	FALSE			Australia,New Guinea	1	1	0	0	0	0	0	2	1	1	2	1:1	0.5
832	Casuariidae	Casuarius casuarius	Southern cassowary	North America	Mexico	FALSE			Australia,New Guinea	1	0	0	0	0	0	0	1	1	0	1	#DIV/0!	1
833	Casuariidae	Casuarius casuarius	Southern cassowary	North America	Mexico	FALSE			Australia,New Guinea	3	1	0	0	0	0	0	4	3	1	4	3:1	0.75
834	Casuariidae	Casuarius casuarius	Southern cassowary	North America	United States	FALSE			Australia,New Guinea	0	0	0	0	2	4	0	6	2	4	6	0.5:1	0.333333
836	Casuariidae	Casuarius casuarius	Southern cassowary	North America	United States	FALSE			Australia,New Guinea	1	1	0	0	0	0	0	2	1	1	2	1:1	0.5
837	Casuariidae	Casuarius casuarius	Southern cassowary	North America	United States	FALSE			Australia,New Guinea	2	3	0	1	0	0	0	5	2	3	5	0.7:1	0.4
838	Casuariidae	Casuarius casuarius	Southern cassowary	North America	United States	FALSE			Australia,New Guinea	1	1	0	0	0	0	0	2	1	1	2	1:1	0.5
839	Casuariidae	Casuarius casuarius	Southern cassowary	North America	United States	FALSE			Australia,New Guinea	1	1	0	0	0	0	0	2	1	1	2	1:1	0.5
840	Casuariidae	Casuarius casuarius	Southern cassowary	North America	United States	FALSE			Australia,New Guinea	0	1	0	0	0	0	0	1	0	1	1	0:1	0
841	Casuariidae	Casuarius casuarius	Southern cassowary	North America	United States	FALSE			Australia,New Guinea	1	1	0	0	0	0	0	2	1	1	2	1:1	0.5
842	Casuariidae	Casuarius casuarius	Southern cassowary	North America	United States	FALSE			Australia,New Guinea	1	0	0	0	0	0	0	1	1	0	1	#DIV/0!	1
843	Casuariidae	Casuarius casuarius	Southern cassowary	North America	United States	FALSE			Australia,New Guinea	1	1	0	0	0	0	0	2	1	1	2	1:1	0.5
844	Casuariidae	Casuarius casuarius	Southern cassowary	North America	United States	FALSE			Australia,New Guinea	1	0	0	0	0	0	0	1	1	0	1	#DIV/0!	1
845	Casuariidae	Casuarius casuarius	Southern cassowary	North America	United States	FALSE			Australia,New Guinea	1	0	0	0	0	0	0	1	1	0	1	#DIV/0!	1
846	Casuariidae	Casuarius casuarius	Southern cassowary	North America	United States	FALSE			Australia,New Guinea	1	1	0	0	0	0	0	2	1	1	2	1:1	0.5
847	Casuariidae	Casuarius casuarius	Southern cassowary	North America	United States	FALSE			Australia,New Guinea	2	1	0	0	0	0	0	3	2	1	3	2:1	0.666667
848	Casuariidae	Casuarius casuarius	Southern cassowary	North America	United States	FALSE			Australia,New Guinea	1	1	0	0	0	0	0	2	1	1	2	1:1	0.5
849	Casuariidae	Casuarius casuarius	Southern cassowary	North America	United States	FALSE			Australia,New Guinea	3	2	0	1	0	0	0	5	3	2	5	1.5:1	0.6
850	Casuariidae	Casuarius casuarius	Southern cassowary	North America	United States	FALSE			Australia,New Guinea	2	0	0	0	0	0	0	2	2	0	2	#DIV/0!	1
851	Casuariidae	Casuarius casuarius	Southern cassowary	North America	United States	FALSE			Australia,New Guinea	1	1	0	0	0	0	0	2	1	1	2	1:1	0.5
852	Casuariidae	Casuarius casuarius	Southern cassowary	North America	United States	FALSE			Australia,New Guinea	1	1	0	0	0	0	0	2	1	1	2	1:1	0.5
853	Casuariidae	Casuarius casuarius	Southern cassowary	North America	United States	FALSE			Australia,New Guinea	1	0	0	0	0	0	0	1	1	0	1	#DIV/0!	1
854	Casuariidae	Casuarius casuarius	Southern cassowary	North America	United States	FALSE			Australia,New Guinea	1	1	0	0	0	0	0	2	1	1	2	1:1	0.5
855	Casuariidae	Casuarius casuarius	Southern cassowary	North America	United States	FALSE			Australia,New Guinea	1	1	0	0	0	0	0	2	1	1	2	1:1	0.5
856	Casuariidae	Casuarius casuarius	Southern cassowary	North America	United States	FALSE			Australia,New Guinea	2	2	0	0	0	0	0	4	2	2	4	1:1	0.5
857	Casuariidae	Casuarius casuarius	Southern cassowary	North America	United States	FALSE			Australia,New Guinea	1	1	0	0	0	0	0	2	1	1	2	1:1	0.5
858	Casuariidae	Casuarius casuarius	Southern cassowary	North America	United States	FALSE			Australia,New Guinea	1	1	0	0	0	0	0	2	1	1	2	1:1	0.5
859	Casuariidae	Casuarius casuarius	Southern cassowary	North America	United States	FALSE			Australia,New Guinea	0	1	0	0	0	0	0	1	0	1	1	0:1	0
860	Casuariidae	Casuarius casuarius	Southern cassowary	North America	United States	FALSE			Australia,New Guinea	1	1	0	0	0	0	0	2	1	1	2	1:1	0.5
861	Casuariidae	Casuarius casuarius	Southern cassowary	North America	United States	FALSE			Australia,New Guinea	2	3	0	0	0	0	0	5	2	3	5	0.7:1	0.4
862	Casuariidae	Casuarius casuarius	Southern cassowary	North America	United States	FALSE			Australia,New Guinea	2	1	0	0	0	0	0	3	2	1	3	2:1	0.666667
863	Casuariidae	Casuarius casuarius	Southern cassowary	South America	Argentina	FALSE			Australia,New Guinea	0	2	0	0	0	0	0	2	0	2	2	0:1	0
864	Casuariidae	Casuarius casuarius	Southern cassowary	South America	Brazil	FALSE			Australia,New Guinea	1	0	0	0	0	0	0	1	1	0	1	#DIV/0!	1
865	Casuariidae	Casuarius casuarius	Southern cassowary	South America	Brazil	FALSE			Australia,New Guinea	0	1	0	0	0	0	0	1	0	1	1	0:1	0
866	Casuariidae	Casuarius casuarius	Southern cassowary	South America	Brazil	FALSE			Australia,New Guinea	0	1	0	0	0	0	0	1	0	1	1	0:1	0
867	Casuariidae	Casuarius casuarius	Southern cassowary	South America	Brazil	FALSE			Australia,New Guinea	1	0	0	0	0	0	0	1	1	0	1	#DIV/0!	1
868	Casuariidae	Casuarius casuarius	Southern cassowary	South America	Brazil	FALSE			Australia,New Guinea	1	1	0	0	0	0	0	2	1	1	2	1:1	0.5
869	Casuariidae	Casuarius casuarius	Southern cassowary	South America	Colombia	FALSE			Australia,New Guinea	1	1	0	0	0	0	0	2	1	1	2	1:1	0.5
870	Casuariidae	Casuarius casuarius casuarius	Double-wattled cassowary	Africa	South Africa	FALSE			SERAM ISLAND INDONESIA	1	0	0	0	0	0	0	1	1	0	1	#DIV/0!	1
871	Casuariidae	Casuarius casuarius casuarius	Double-wattled cassowary	Australia (Oceania)	Australia	TRUE			SERAM ISLAND INDONESIA	0	1	0	0	0	0	0	1	0	1	1	0:1	0
872	Casuariidae	Casuarius casuarius bicarunculatus	Double-wattled cassowary	Europe	Serbia	FALSE			INDONESIA	1	1	0	0	0	0	0	2	1	1	2	1:1	0.5
873	Casuariidae	Casuarius casuarius bicarunculatus	Double-wattled cassowary	North America	Mexico	FALSE			INDONESIA	1	0	0	0	0	0	0	1	1	0	1	#DIV/0!	1
874	Casuariidae	Casuarius casuarius johnsonii	Double-wattled cassowary	Australia (Oceania)	Australia	FALSE			NORTH QUEENSLAND AUSTRAL	1	1	0	0	0	0	0	2	1	1	2	1:1	0.5
875	Casuariidae	Casuarius casuarius johnsonii	Double-wattled cassowary	Australia (Oceania)	Australia	FALSE			NORTH QUEENSLAND AUSTRAL	0	2	0	0	0	0	0	2	0	2	2	0:1	0
876	Casuariidae	Casuarius casuarius johnsonii	Double-wattled cassowary	Australia (Oceania)	Australia	FALSE			NORTH QUEENSLAND AUSTRAL	0	1	0	0	0	0	0	1	0	1	1	0:1	0
877	Casuariidae	Casuarius casuarius johnsonii	Double-wattled cassowary	Australia (Oceania)	Australia	TRUE			NORTH QUEENSLAND AUSTRAL	1	0	0	0	0	0	0	1	1	0	1	#DIV/0!	1
878	Casuariidae	Casuarius casuarius johnsonii	Double-wattled cassowary	Australia (Oceania)	Australia	FALSE			NORTH QUEENSLAND AUSTRAL	1	0	0	0	0	0	0	1	1	0	1	#DIV/0!	1
879	Casuariidae	Casuarius casuarius johnsonii	Double-wattled cassowary	Australia (Oceania)	Australia	FALSE			NORTH QUEENSLAND AUSTRAL	1	1	0	0	0	0	0	2	1	1	2	1:1	0.5
880	Casuariidae	Casuarius casuarius johnsonii	Double-wattled cassowary	Australia (Oceania)	Australia	FALSE			NORTH QUEENSLAND AUSTRAL	0	1	0	0	0	0	0	1	0	1	1	0:1	0
881	Casuariidae	Casuarius casuarius johnsonii	Double-wattled cassowary	Australia (Oceania)	Australia	FALSE			NORTH QUEENSLAND AUSTRAL	3	2	0	0	0	0	0	5	3	2	5	1.5:1	0.6
882	Casuariidae	Casuarius casuarius johnsonii	Double-wattled cassowary	Australia (Oceania)	Australia	FALSE			NORTH QUEENSLAND AUSTRAL	0	1	0	0	0	0	0	1	0	1	1	0:1	0
884	Casuariidae	Casuarius casuarius johnsonii	Double-wattled cassowary	Australia (Oceania)	Australia	FALSE			NORTH QUEENSLAND AUSTRAL	1	0	0	0	0	0	0	1	1	0	1	#DIV/0!	1
885	Casuariidae	Casuarius casuarius johnsonii	Double-wattled cassowary	Australia (Oceania)	Australia	FALSE			NORTH QUEENSLAND AUSTRAL	0	1	0	0	0	0	0	1	0	1	1	0:1	0
887	Casuariidae	Casuarius casuarius johnsonii	Double-wattled cassowary	Australia (Oceania)	Australia	FALSE			NORTH QUEENSLAND AUSTRAL	1	1	0	0	0	0	0	2	1	1	2	1:1	0.5
888	Casuariidae	Casuarius casuarius johnsonii	Double-wattled cassowary	Australia (Oceania)	Australia	TRUE			NORTH QUEENSLAND AUSTRAL	1	1	0	0	0	0	0	2	1	1	2	1:1	0.5
889	Casuariidae	Casuarius casuarius johnsonii	Double-wattled cassowary	Australia (Oceania)	Australia	FALSE			NORTH QUEENSLAND AUSTRAL	0	1	0	0	0	0	0	1	0	1	1	0:1	0
890	Casuariidae	Casuarius casuarius johnsonii	Double-wattled cassowary	Australia (Oceania)	Australia	FALSE			NORTH QUEENSLAND AUSTRAL	0	1	0	0	0	0	0	1	0	1	1	0:1	0
891	Casuariidae	Casuarius casuarius johnsonii	Double-wattled cassowary	Europe	United Kingdom	FALSE			NORTH QUEENSLAND AUSTRAL	1	0	0	0	0	0	0	1	1	0	1	#DIV/0!	1
892	Casuariidae	Casuarius casuarius johnsonii	Double-wattled cassowary	South America	Chile	FALSE			NORTH QUEENSLAND AUSTRAL	1	1	0	0	0	0	0	2	1	1	2	1:1	0.5
893	Casuariidae	Casuarius casuarius altijugus	Double-wattled cassowary	Asia	Israel	FALSE			NEW GUINEA	0	1	0	0	0	0	0	1	0	1	1	0:1	0
894	Casuariidae	Casuarius bennetti	Dwarf cassowary	Australia (Oceania)	Papua New Guinea	TRUE			<p>New Guinea, Yapen I. and New Britain</p>	1	1	0	0	0	0	0	2	1	1	2	1:1	0.5
895	Casuariidae	Casuarius bennetti	Dwarf cassowary	Europe	Germany	FALSE			<p>New Guinea, Yapen I. and New Britain</p>	0	1	0	0	0	0	0	1	0	1	1	0:1	0
896	Casuariidae	Casuarius unappendiculatus	Northern cassowary	Asia	Singapore	FALSE			NEW GUINEA	1	1	0	0	0	0	0	2	1	1	2	1:1	0.5
897	Casuariidae	Casuarius unappendiculatus	Northern cassowary	Asia	Thailand	FALSE			NEW GUINEA	1	0	0	0	0	0	0	1	1	0	1	#DIV/0!	1
899	Casuariidae	Dromaius novaehollandiae	Emu	Asia	India	FALSE			-	0	0	0	0	8	6	0	14	8	6	14	1.3:1	0.571429
901	Casuariidae	Dromaius novaehollandiae	Emu	Australia (Oceania)	Australia	TRUE			-	0	3	0	0	0	0	0	3	0	3	3	0:1	0
904	Casuariidae	Dromaius novaehollandiae	Emu	Australia (Oceania)	Australia	TRUE			-	2	1	0	0	0	0	0	3	2	1	3	2:1	0.666667
906	Casuariidae	Dromaius novaehollandiae	Emu	Europe	Belgium	FALSE			-	1	1	2	0	0	0	0	4	1	1	2	1:1	0.5
907	Casuariidae	Dromaius novaehollandiae	Emu	Europe	Ireland	FALSE			-	1	1	0	0	0	0	0	2	1	1	2	1:1	0.5
908	Casuariidae	Dromaius novaehollandiae	Emu	Europe	Italy	FALSE			-	1	1	2	0	0	0	0	4	1	1	2	1:1	0.5
910	Casuariidae	Dromaius novaehollandiae	Emu	Europe	United Kingdom	FALSE			-	2	0	0	0	0	0	0	2	2	0	2	#DIV/0!	1
911	Casuariidae	Dromaius novaehollandiae	Emu	Europe	United Kingdom	FALSE			-	2	3	0	0	0	0	0	5	2	3	5	0.7:1	0.4
912	Casuariidae	Dromaius novaehollandiae	Emu	Europe	United Kingdom	FALSE			-	0	3	1	0	0	0	0	4	0	3	3	0:1	0
913	Casuariidae	Dromaius novaehollandiae	Emu	North America	Canada	FALSE			-	0	2	0	0	0	0	0	2	0	2	2	0:1	0
914	Casuariidae	Dromaius novaehollandiae	Emu	North America	United States	FALSE			-	0	3	0	0	0	0	0	3	0	3	3	0:1	0
915	Casuariidae	Dromaius novaehollandiae	Emu	North America	United States	FALSE			-	2	0	0	0	0	0	0	2	2	0	2	#DIV/0!	1
916	Casuariidae	Dromaius novaehollandiae	Emu	North America	United States	FALSE			-	1	1	0	0	0	0	0	2	1	1	2	1:1	0.5
917	Casuariidae	Dromaius novaehollandiae	Emu	North America	United States	FALSE			-	1	0	3	0	0	0	0	4	1	0	1	#DIV/0!	1
920	Casuariidae	Dromaius novaehollandiae	Emu	Africa	Egypt	FALSE			Australia	4	2	17	9	0	0	0	23	4	2	6	2:1	0.666667
921	Casuariidae	Dromaius novaehollandiae	Emu	Africa	South Africa	FALSE			Australia	1	0	0	0	0	0	0	1	1	0	1	#DIV/0!	1
922	Casuariidae	Dromaius novaehollandiae	Emu	Africa	South Africa	FALSE			Australia	3	2	1	0	0	0	0	6	3	2	5	1.5:1	0.6
923	Casuariidae	Dromaius novaehollandiae	Emu	Africa	South Africa	FALSE			Australia	0	1	0	0	0	0	0	1	0	1	1	0:1	0
924	Casuariidae	Dromaius novaehollandiae	Emu	Asia	Armenia	FALSE			Australia	0	1	0	0	0	0	0	1	0	1	1	0:1	0
926	Casuariidae	Dromaius novaehollandiae	Emu	Asia	Cyprus	FALSE			Australia	1	0	0	0	0	0	0	1	1	0	1	#DIV/0!	1
927	Casuariidae	Dromaius novaehollandiae	Emu	Asia	India	FALSE			Australia	0	0	0	0	4	2	0	6	4	2	6	2:1	0.666667
928	Casuariidae	Dromaius novaehollandiae	Emu	Asia	India	FALSE			Australia	0	0	0	0	1	1	0	23	1	1	2	1:1	0.5
930	Casuariidae	Dromaius novaehollandiae	Emu	Asia	India	FALSE			Australia	2	4	0	0	0	0	0	6	2	4	6	0.5:1	0.333333
931	Casuariidae	Dromaius novaehollandiae	Emu	Asia	India	FALSE			Australia	0	0	0	0	2	3	0	5	2	3	5	0.7:1	0.4
932	Casuariidae	Dromaius novaehollandiae	Emu	Asia	Israel	FALSE			Australia	0	2	0	0	0	0	0	2	0	2	2	0:1	0
933	Casuariidae	Dromaius novaehollandiae	Emu	Asia	Israel	FALSE			Australia	1	1	0	0	0	0	0	2	1	1	2	1:1	0.5
934	Casuariidae	Dromaius novaehollandiae	Emu	Asia	Israel	FALSE			Australia	0	3	0	0	0	0	0	3	0	3	3	0:1	0
935	Casuariidae	Dromaius novaehollandiae	Emu	Asia	Israel	FALSE			Australia	1	1	0	0	0	0	0	2	1	1	2	1:1	0.5
936	Casuariidae	Dromaius novaehollandiae	Emu	Asia	Israel	FALSE			Australia	1	2	0	0	0	0	0	3	1	2	3	0.5:1	0.333333
937	Casuariidae	Dromaius novaehollandiae	Emu	Asia	Israel	FALSE			Australia	1	1	0	0	0	0	0	2	1	1	2	1:1	0.5
938	Casuariidae	Dromaius novaehollandiae	Emu	Asia	Israel	FALSE			Australia	1	0	1	0	0	0	0	2	1	0	1	#DIV/0!	1
939	Casuariidae	Dromaius novaehollandiae	Emu	Asia	Israel	FALSE			Australia	1	0	0	0	0	0	0	1	1	0	1	#DIV/0!	1
940	Casuariidae	Dromaius novaehollandiae	Emu	Asia	Japan	FALSE			Australia	1	2	0	0	0	0	0	3	1	2	3	0.5:1	0.333333
941	Casuariidae	Dromaius novaehollandiae	Emu	Asia	Japan	FALSE			Australia	1	0	1	0	0	0	0	2	1	0	1	#DIV/0!	1
942	Casuariidae	Dromaius novaehollandiae	Emu	Asia	Japan	FALSE			Australia	1	2	0	0	0	0	0	3	1	2	3	0.5:1	0.333333
943	Casuariidae	Dromaius novaehollandiae	Emu	Asia	Japan	FALSE			Australia	1	0	0	0	0	0	0	1	1	0	1	#DIV/0!	1
944	Casuariidae	Dromaius novaehollandiae	Emu	Asia	Japan	FALSE			Australia	2	1	0	0	0	0	0	3	2	1	3	2:1	0.666667
945	Casuariidae	Dromaius novaehollandiae	Emu	Asia	Japan	FALSE			Australia	10	3	1	0	0	0	0	14	10	3	13	3.3:1	0.769231
946	Casuariidae	Dromaius novaehollandiae	Emu	Asia	Japan	FALSE			Australia	1	1	1	0	0	0	0	3	1	1	2	1:1	0.5
947	Casuariidae	Dromaius novaehollandiae	Emu	Asia	Japan	FALSE			Australia	1	3	0	0	0	0	0	4	1	3	4	0.3:1	0.25
948	Casuariidae	Dromaius novaehollandiae	Emu	Asia	Japan	FALSE			Australia	1	0	0	0	0	0	0	1	1	0	1	#DIV/0!	1
949	Casuariidae	Dromaius novaehollandiae	Emu	Asia	Japan	FALSE			Australia	1	1	0	0	0	0	0	2	1	1	2	1:1	0.5
950	Casuariidae	Dromaius novaehollandiae	Emu	Asia	Japan	FALSE			Australia	3	3	0	0	0	0	0	6	3	3	6	1:1	0.5
952	Casuariidae	Dromaius novaehollandiae	Emu	Asia	Kazakhstan	FALSE			Australia	3	3	0	0	0	0	0	6	3	3	6	1:1	0.5
953	Casuariidae	Dromaius novaehollandiae	Emu	Asia	Kazakhstan	FALSE			Australia	0	1	0	0	0	0	0	1	0	1	1	0:1	0
954	Casuariidae	Dromaius novaehollandiae	Emu	Asia	Korea, Republic Of	FALSE			Australia	1	1	0	0	0	0	0	2	1	1	2	1:1	0.5
956	Casuariidae	Dromaius novaehollandiae	Emu	Asia	Nepal	FALSE			Australia	0	0	0	0	1	1	11	13	1	1	2	1:1	0.5
957	Casuariidae	Dromaius novaehollandiae	Emu	Asia	Singapore	FALSE			Australia	2	2	0	0	0	0	0	4	2	2	4	1:1	0.5
958	Casuariidae	Dromaius novaehollandiae	Emu	Asia	Sri Lanka	FALSE			Australia	2	2	0	0	0	0	0	4	2	2	4	1:1	0.5
959	Casuariidae	Dromaius novaehollandiae	Emu	Asia	Taiwan	FALSE			Australia	6	1	7	0	0	0	0	14	6	1	7	6:1	0.857143
963	Casuariidae	Dromaius novaehollandiae	Emu	Asia	Thailand	FALSE			Australia	2	1	1	0	0	0	0	4	2	1	3	2:1	0.666667
965	Casuariidae	Dromaius novaehollandiae	Emu	Asia	Thailand	FALSE			Australia	2	3	0	0	0	0	0	5	2	3	5	0.7:1	0.4
966	Casuariidae	Dromaius novaehollandiae	Emu	Asia	Turkey	FALSE			Australia	1	2	0	0	0	0	0	3	1	2	3	0.5:1	0.333333
967	Casuariidae	Dromaius novaehollandiae	Emu	Asia	Turkey	FALSE			Australia	3	6	2	2	0	0	0	11	3	6	9	0.5:1	0.333333
968	Casuariidae	Dromaius novaehollandiae	Emu	Asia	United Arab Emirates	FALSE			Australia	1	1	26	0	0	0	0	28	1	1	2	1:1	0.5
969	Casuariidae	Dromaius novaehollandiae	Emu	Asia	United Arab Emirates	FALSE			Australia	2	3	0	0	0	0	0	5	2	3	5	0.7:1	0.4
971	Casuariidae	Dromaius novaehollandiae	Emu	Asia	Uzbekistan	FALSE			Australia	1	1	2	0	0	0	0	4	1	1	2	1:1	0.5
972	Casuariidae	Dromaius novaehollandiae	Emu	Australia (Oceania)	Australia	TRUE			Australia	2	2	0	0	0	0	0	4	2	2	4	1:1	0.5
973	Casuariidae	Dromaius novaehollandiae	Emu	Australia (Oceania)	Australia	TRUE			Australia	0	0	0	0	2	2	0	4	2	2	4	1:1	0.5
974	Casuariidae	Dromaius novaehollandiae	Emu	Australia (Oceania)	Australia	TRUE			Australia	2	2	1	0	0	0	0	5	2	2	4	1:1	0.5
975	Casuariidae	Dromaius novaehollandiae	Emu	Australia (Oceania)	Australia	TRUE			Australia	2	0	0	0	0	0	0	2	2	0	2	#DIV/0!	1
976	Casuariidae	Dromaius novaehollandiae	Emu	Australia (Oceania)	Australia	TRUE			Australia	2	0	0	0	0	0	0	2	2	0	2	#DIV/0!	1
977	Casuariidae	Dromaius novaehollandiae	Emu	Australia (Oceania)	Australia	TRUE			Australia	1	1	1	0	0	0	0	3	1	1	2	1:1	0.5
978	Casuariidae	Dromaius novaehollandiae	Emu	Australia (Oceania)	Australia	TRUE			Australia	0	2	0	0	0	0	0	2	0	2	2	0:1	0
979	Casuariidae	Dromaius novaehollandiae	Emu	Australia (Oceania)	Australia	TRUE			Australia	1	1	0	0	0	0	0	2	1	1	2	1:1	0.5
980	Casuariidae	Dromaius novaehollandiae	Emu	Australia (Oceania)	Australia	TRUE			Australia	0	3	0	0	3	1	1	8	3	4	7	0.8:1	0.428571
981	Casuariidae	Dromaius novaehollandiae	Emu	Australia (Oceania)	Australia	TRUE			Australia	1	0	1	0	0	0	0	2	1	0	1	#DIV/0!	1
982	Casuariidae	Dromaius novaehollandiae	Emu	Australia (Oceania)	Australia	TRUE			Australia	1	0	0	0	0	0	0	1	1	0	1	#DIV/0!	1
983	Casuariidae	Dromaius novaehollandiae	Emu	Australia (Oceania)	Australia	TRUE			Australia	2	0	0	0	0	0	0	2	2	0	2	#DIV/0!	1
984	Casuariidae	Dromaius novaehollandiae	Emu	Australia (Oceania)	Australia	TRUE			Australia	0	0	0	0	1	1	0	2	1	1	2	1:1	0.5
985	Casuariidae	Dromaius novaehollandiae	Emu	Australia (Oceania)	Australia	TRUE			Australia	7	4	0	0	0	0	72	83	7	4	11	1.8:1	0.636364
986	Casuariidae	Dromaius novaehollandiae	Emu	Australia (Oceania)	Australia	TRUE			Australia	0	2	0	0	0	0	0	2	0	2	2	0:1	0
987	Casuariidae	Dromaius novaehollandiae	Emu	Australia (Oceania)	Australia	TRUE			Australia	1	0	0	0	0	0	0	1	1	0	1	#DIV/0!	1
989	Casuariidae	Dromaius novaehollandiae	Emu	Australia (Oceania)	Australia	TRUE			Australia	1	3	0	0	0	0	0	4	1	3	4	0.3:1	0.25
990	Casuariidae	Dromaius novaehollandiae	Emu	Australia (Oceania)	Australia	TRUE			Australia	1	1	0	0	0	0	0	2	1	1	2	1:1	0.5
993	Casuariidae	Dromaius novaehollandiae	Emu	Australia (Oceania)	Australia	TRUE			Australia	1	0	0	0	0	0	0	1	1	0	1	#DIV/0!	1
995	Casuariidae	Dromaius novaehollandiae	Emu	Australia (Oceania)	Australia	TRUE			Australia	2	0	0	0	0	0	0	2	2	0	2	#DIV/0!	1
996	Casuariidae	Dromaius novaehollandiae	Emu	Australia (Oceania)	Australia	TRUE			Australia	1	3	1	0	0	0	0	5	1	3	4	0.3:1	0.25
997	Casuariidae	Dromaius novaehollandiae	Emu	Australia (Oceania)	Australia	TRUE			Australia	1	1	0	0	0	0	0	2	1	1	2	1:1	0.5
1000	Casuariidae	Dromaius novaehollandiae	Emu	Australia (Oceania)	Australia	TRUE			Australia	1	0	2	0	0	0	0	3	1	0	1	#DIV/0!	1
1001	Casuariidae	Dromaius novaehollandiae	Emu	Australia (Oceania)	Australia	TRUE			Australia	1	0	0	0	0	0	0	1	1	0	1	#DIV/0!	1
1002	Casuariidae	Dromaius novaehollandiae	Emu	Australia (Oceania)	New Zealand	FALSE			Australia	0	1	0	0	0	0	0	1	0	1	1	0:1	0
1003	Casuariidae	Dromaius novaehollandiae	Emu	Australia (Oceania)	New Zealand	FALSE			Australia	1	2	5	5	0	0	0	8	1	2	3	0.5:1	0.333333
1004	Casuariidae	Dromaius novaehollandiae	Emu	Europe	Austria	FALSE			Australia	0	2	9	0	0	0	0	11	0	2	2	0:1	0
1005	Casuariidae	Dromaius novaehollandiae	Emu	Europe	Austria	FALSE			Australia	1	1	0	0	0	0	0	2	1	1	2	1:1	0.5
1006	Casuariidae	Dromaius novaehollandiae	Emu	Europe	Austria	FALSE			Australia	2	2	0	0	0	0	0	4	2	2	4	1:1	0.5
1007	Casuariidae	Dromaius novaehollandiae	Emu	Europe	Belarus	FALSE			Australia	1	0	0	0	0	0	0	1	1	0	1	#DIV/0!	1
1008	Casuariidae	Dromaius novaehollandiae	Emu	Europe	Belgium	FALSE			Australia	1	1	1	1	0	0	0	3	1	1	2	1:1	0.5
1009	Casuariidae	Dromaius novaehollandiae	Emu	Europe	Belgium	FALSE			Australia	1	0	0	0	0	0	0	1	1	0	1	#DIV/0!	1
1010	Casuariidae	Dromaius novaehollandiae	Emu	Europe	Belgium	FALSE			Australia	1	0	0	0	0	0	0	1	1	0	1	#DIV/0!	1
1011	Casuariidae	Dromaius novaehollandiae	Emu	Europe	Belgium	FALSE			Australia	1	1	0	0	0	0	0	2	1	1	2	1:1	0.5
1012	Casuariidae	Dromaius novaehollandiae	Emu	Europe	Belgium	FALSE			Australia	1	1	0	0	0	0	0	2	1	1	2	1:1	0.5
1013	Casuariidae	Dromaius novaehollandiae	Emu	Europe	Belgium	FALSE			Australia	1	0	0	0	0	0	0	1	1	0	1	#DIV/0!	1
1014	Casuariidae	Dromaius novaehollandiae	Emu	Europe	Bulgaria	FALSE			Australia	2	0	0	0	0	0	0	2	2	0	2	#DIV/0!	1
1016	Casuariidae	Dromaius novaehollandiae	Emu	Europe	Croatia	FALSE			Australia	1	2	0	0	0	0	0	3	1	2	3	0.5:1	0.333333
1017	Casuariidae	Dromaius novaehollandiae	Emu	Europe	Czech Republic	FALSE			Australia	1	1	0	0	0	0	0	2	1	1	2	1:1	0.5
1018	Casuariidae	Dromaius novaehollandiae	Emu	Europe	Czech Republic	FALSE			Australia	1	1	0	0	0	0	0	2	1	1	2	1:1	0.5
1019	Casuariidae	Dromaius novaehollandiae	Emu	Europe	Czech Republic	FALSE			Australia	1	0	0	0	0	0	0	1	1	0	1	#DIV/0!	1
1021	Casuariidae	Dromaius novaehollandiae	Emu	Europe	Czech Republic	FALSE			Australia	2	1	0	0	0	0	0	3	2	1	3	2:1	0.666667
1022	Casuariidae	Dromaius novaehollandiae	Emu	Europe	Czech Republic	FALSE			Australia	1	1	0	0	0	0	0	2	1	1	2	1:1	0.5
1023	Casuariidae	Dromaius novaehollandiae	Emu	Europe	Czech Republic	FALSE			Australia	4	3	0	2	0	0	0	7	4	3	7	1.3:1	0.571429
1024	Casuariidae	Dromaius novaehollandiae	Emu	Europe	Denmark	FALSE			Australia	0	4	0	0	0	0	0	4	0	4	4	0:1	0
1025	Casuariidae	Dromaius novaehollandiae	Emu	Europe	Denmark	FALSE			Australia	5	1	0	0	0	0	0	6	5	1	6	5:1	0.833333
1026	Casuariidae	Dromaius novaehollandiae	Emu	Europe	Denmark	FALSE			Australia	1	1	0	0	0	0	0	2	1	1	2	1:1	0.5
1027	Casuariidae	Dromaius novaehollandiae	Emu	Europe	Denmark	FALSE			Australia	1	1	0	0	0	0	0	2	1	1	2	1:1	0.5
1028	Casuariidae	Dromaius novaehollandiae	Emu	Europe	Denmark	FALSE			Australia	1	1	0	0	0	0	0	2	1	1	2	1:1	0.5
1031	Casuariidae	Dromaius novaehollandiae	Emu	Europe	Denmark	FALSE			Australia	1	1	0	0	0	0	0	2	1	1	2	1:1	0.5
1032	Casuariidae	Dromaius novaehollandiae	Emu	Europe	Denmark	FALSE			Australia	1	3	0	0	0	0	0	4	1	3	4	0.3:1	0.25
1033	Casuariidae	Dromaius novaehollandiae	Emu	Europe	Denmark	FALSE			Australia	1	0	6	0	1	5	0	13	2	5	7	0.4:1	0.285714
1034	Casuariidae	Dromaius novaehollandiae	Emu	Europe	Finland	FALSE			Australia	0	2	0	0	0	0	0	2	0	2	2	0:1	0
1035	Casuariidae	Dromaius novaehollandiae	Emu	Europe	France	FALSE			Australia	0	1	0	0	0	0	0	1	0	1	1	0:1	0
1036	Casuariidae	Dromaius novaehollandiae	Emu	Europe	France	FALSE			Australia	1	3	4	0	0	0	0	8	1	3	4	0.3:1	0.25
1038	Casuariidae	Dromaius novaehollandiae	Emu	Europe	France	FALSE			Australia	1	1	0	0	0	0	0	2	1	1	2	1:1	0.5
1039	Casuariidae	Dromaius novaehollandiae	Emu	Europe	France	FALSE			Australia	1	1	0	0	0	0	0	2	1	1	2	1:1	0.5
1040	Casuariidae	Dromaius novaehollandiae	Emu	Europe	France	FALSE			Australia	0	2	0	0	0	0	0	2	0	2	2	0:1	0
1041	Casuariidae	Dromaius novaehollandiae	Emu	Europe	France	FALSE			Australia	0	7	0	0	0	0	0	7	0	7	7	0:1	0
1042	Casuariidae	Dromaius novaehollandiae	Emu	Europe	France	FALSE			Australia	1	3	1	0	0	0	0	5	1	3	4	0.3:1	0.25
1044	Casuariidae	Dromaius novaehollandiae	Emu	Europe	France	FALSE			Australia	3	2	9	0	0	0	0	14	3	2	5	1.5:1	0.6
1045	Casuariidae	Dromaius novaehollandiae	Emu	Europe	France	FALSE			Australia	1	1	0	0	0	0	0	2	1	1	2	1:1	0.5
1046	Casuariidae	Dromaius novaehollandiae	Emu	Europe	France	FALSE			Australia	2	0	0	0	0	0	0	2	2	0	2	#DIV/0!	1
1047	Casuariidae	Dromaius novaehollandiae	Emu	Europe	France	FALSE			Australia	2	0	0	0	0	0	0	2	2	0	2	#DIV/0!	1
1048	Casuariidae	Dromaius novaehollandiae	Emu	Europe	France	FALSE			Australia	1	0	2	0	0	0	0	3	1	0	1	#DIV/0!	1
1049	Casuariidae	Dromaius novaehollandiae	Emu	Europe	France	FALSE			Australia	1	0	0	0	0	0	0	1	1	0	1	#DIV/0!	1
1050	Casuariidae	Dromaius novaehollandiae	Emu	Europe	France	FALSE			Australia	1	1	0	0	0	0	0	2	1	1	2	1:1	0.5
1051	Casuariidae	Dromaius novaehollandiae	Emu	Europe	France	FALSE			Australia	1	2	3	0	0	0	0	6	1	2	3	0.5:1	0.333333
1052	Casuariidae	Dromaius novaehollandiae	Emu	Europe	France	FALSE			Australia	1	0	2	0	0	0	0	3	1	0	1	#DIV/0!	1
1053	Casuariidae	Dromaius novaehollandiae	Emu	Europe	France	FALSE			Australia	1	1	0	0	0	0	0	2	1	1	2	1:1	0.5
1054	Casuariidae	Dromaius novaehollandiae	Emu	Europe	France	FALSE			Australia	2	2	0	0	0	0	0	4	2	2	4	1:1	0.5
1055	Casuariidae	Dromaius novaehollandiae	Emu	Europe	France	FALSE			Australia	0	1	1	0	0	0	0	2	0	1	1	0:1	0
1056	Casuariidae	Dromaius novaehollandiae	Emu	Europe	France	FALSE			Australia	2	2	1	1	0	0	0	5	2	2	4	1:1	0.5
1057	Casuariidae	Dromaius novaehollandiae	Emu	Europe	France	FALSE			Australia	1	2	3	3	0	0	0	6	1	2	3	0.5:1	0.333333
1058	Casuariidae	Dromaius novaehollandiae	Emu	Europe	France	FALSE			Australia	4	9	0	2	0	0	0	13	4	9	13	0.4:1	0.307692
1059	Casuariidae	Dromaius novaehollandiae	Emu	Europe	France	FALSE			Australia	1	1	1	0	0	0	0	3	1	1	2	1:1	0.5
1061	Casuariidae	Dromaius novaehollandiae	Emu	Europe	France	FALSE			Australia	3	1	0	0	0	0	0	4	3	1	4	3:1	0.75
1062	Casuariidae	Dromaius novaehollandiae	Emu	Europe	Germany	FALSE			Australia	1	0	0	0	0	0	0	1	1	0	1	#DIV/0!	1
1063	Casuariidae	Dromaius novaehollandiae	Emu	Europe	Germany	FALSE			Australia	1	1	0	0	0	0	0	2	1	1	2	1:1	0.5
1064	Casuariidae	Dromaius novaehollandiae	Emu	Europe	Germany	FALSE			Australia	1	1	0	0	0	0	0	2	1	1	2	1:1	0.5
1065	Casuariidae	Dromaius novaehollandiae	Emu	Europe	Germany	FALSE			Australia	1	1	0	0	0	0	0	2	1	1	2	1:1	0.5
1066	Casuariidae	Dromaius novaehollandiae	Emu	Europe	Germany	FALSE			Australia	1	1	0	0	0	0	0	2	1	1	2	1:1	0.5
1067	Casuariidae	Dromaius novaehollandiae	Emu	Europe	Germany	FALSE			Australia	1	1	0	0	0	0	0	2	1	1	2	1:1	0.5
1068	Casuariidae	Dromaius novaehollandiae	Emu	Europe	Germany	FALSE			Australia	1	1	0	0	0	0	0	2	1	1	2	1:1	0.5
1069	Casuariidae	Dromaius novaehollandiae	Emu	Europe	Germany	FALSE			Australia	0	2	0	0	0	0	0	2	0	2	2	0:1	0
1070	Casuariidae	Dromaius novaehollandiae	Emu	Europe	Germany	FALSE			Australia	0	2	0	0	0	0	0	2	0	2	2	0:1	0
1071	Casuariidae	Dromaius novaehollandiae	Emu	Europe	Germany	FALSE			Australia	0	1	0	0	0	0	0	1	0	1	1	0:1	0
1072	Casuariidae	Dromaius novaehollandiae	Emu	Europe	Germany	FALSE			Australia	1	1	0	0	0	0	0	2	1	1	2	1:1	0.5
1073	Casuariidae	Dromaius novaehollandiae	Emu	Europe	Germany	FALSE			Australia	0	1	2	2	0	0	0	3	0	1	1	0:1	0
1074	Casuariidae	Dromaius novaehollandiae	Emu	Europe	Germany	FALSE			Australia	1	1	0	0	0	0	0	2	1	1	2	1:1	0.5
1075	Casuariidae	Dromaius novaehollandiae	Emu	Europe	Germany	FALSE			Australia	1	2	0	0	0	0	0	3	1	2	3	0.5:1	0.333333
1076	Casuariidae	Dromaius novaehollandiae	Emu	Europe	Germany	FALSE			Australia	1	1	0	0	0	0	0	2	1	1	2	1:1	0.5
1077	Casuariidae	Dromaius novaehollandiae	Emu	Europe	Germany	FALSE			Australia	1	2	0	0	0	0	0	3	1	2	3	0.5:1	0.333333
1078	Casuariidae	Dromaius novaehollandiae	Emu	Europe	Germany	FALSE			Australia	3	3	0	0	0	0	0	6	3	3	6	1:1	0.5
1079	Casuariidae	Dromaius novaehollandiae	Emu	Europe	Germany	FALSE			Australia	1	1	0	0	0	0	0	2	1	1	2	1:1	0.5
1080	Casuariidae	Dromaius novaehollandiae	Emu	Europe	Germany	FALSE			Australia	1	1	0	0	0	0	0	2	1	1	2	1:1	0.5
1081	Casuariidae	Dromaius novaehollandiae	Emu	Europe	Germany	FALSE			Australia	1	1	0	0	0	0	0	2	1	1	2	1:1	0.5
1082	Casuariidae	Dromaius novaehollandiae	Emu	Europe	Germany	FALSE			Australia	1	1	0	0	0	0	0	2	1	1	2	1:1	0.5
1083	Casuariidae	Dromaius novaehollandiae	Emu	Europe	Germany	FALSE			Australia	1	1	0	0	0	0	0	2	1	1	2	1:1	0.5
1084	Casuariidae	Dromaius novaehollandiae	Emu	Europe	Germany	FALSE			Australia	1	1	2	0	0	0	0	4	1	1	2	1:1	0.5
1085	Casuariidae	Dromaius novaehollandiae	Emu	Europe	Germany	FALSE			Australia	2	0	0	0	0	0	0	2	2	0	2	#DIV/0!	1
1086	Casuariidae	Dromaius novaehollandiae	Emu	Europe	Germany	FALSE			Australia	3	0	0	0	0	0	0	3	3	0	3	#DIV/0!	1
1089	Casuariidae	Dromaius novaehollandiae	Emu	Europe	Hungary	FALSE			Australia	3	3	0	0	0	0	0	6	3	3	6	1:1	0.5
1090	Casuariidae	Dromaius novaehollandiae	Emu	Europe	Hungary	FALSE			Australia	2	1	0	0	0	0	0	3	2	1	3	2:1	0.666667
1092	Casuariidae	Dromaius novaehollandiae	Emu	Europe	Hungary	FALSE			Australia	1	2	0	0	0	0	0	3	1	2	3	0.5:1	0.333333
1093	Casuariidae	Dromaius novaehollandiae	Emu	Europe	Hungary	FALSE			Australia	1	0	0	0	0	0	0	1	1	0	1	#DIV/0!	1
1095	Casuariidae	Dromaius novaehollandiae	Emu	Europe	Hungary	FALSE			Australia	1	1	0	0	0	0	0	2	1	1	2	1:1	0.5
1096	Casuariidae	Dromaius novaehollandiae	Emu	Europe	Ireland	FALSE			Australia	1	1	0	0	0	0	0	2	1	1	2	1:1	0.5
1097	Casuariidae	Dromaius novaehollandiae	Emu	Europe	Isle Of Man	FALSE			Australia	1	1	0	0	0	0	0	2	1	1	2	1:1	0.5
1098	Casuariidae	Dromaius novaehollandiae	Emu	Europe	Italy	FALSE			Australia	2	0	0	0	0	0	0	2	2	0	2	#DIV/0!	1
1099	Casuariidae	Dromaius novaehollandiae	Emu	Europe	Italy	FALSE			Australia	1	1	0	0	0	0	0	2	1	1	2	1:1	0.5
1100	Casuariidae	Dromaius novaehollandiae	Emu	Europe	Italy	FALSE			Australia	1	1	0	0	0	0	0	2	1	1	2	1:1	0.5
1101	Casuariidae	Dromaius novaehollandiae	Emu	Europe	Italy	FALSE			Australia	1	1	0	0	0	0	0	2	1	1	2	1:1	0.5
1102	Casuariidae	Dromaius novaehollandiae	Emu	Europe	Italy	FALSE			Australia	0	2	0	0	0	0	0	2	0	2	2	0:1	0
1104	Casuariidae	Dromaius novaehollandiae	Emu	Europe	Italy	FALSE			Australia	0	0	0	0	0	2	0	2	0	2	2	0:1	0
1105	Casuariidae	Dromaius novaehollandiae	Emu	Europe	Luxembourg	FALSE			Australia	2	0	0	0	0	0	0	2	2	0	2	#DIV/0!	1
1106	Casuariidae	Dromaius novaehollandiae	Emu	Europe	Netherlands	FALSE			Australia	0	1	0	0	0	0	0	1	0	1	1	0:1	0
1107	Casuariidae	Dromaius novaehollandiae	Emu	Europe	Netherlands	FALSE			Australia	1	1	0	0	0	0	0	2	1	1	2	1:1	0.5
1108	Casuariidae	Dromaius novaehollandiae	Emu	Europe	Netherlands	FALSE			Australia	1	1	0	0	0	0	0	2	1	1	2	1:1	0.5
1109	Casuariidae	Dromaius novaehollandiae	Emu	Europe	Netherlands	FALSE			Australia	1	1	0	0	0	0	0	2	1	1	2	1:1	0.5
1110	Casuariidae	Dromaius novaehollandiae	Emu	Europe	Norway	FALSE			Australia	2	1	1	0	0	0	0	4	2	1	3	2:1	0.666667
1111	Casuariidae	Dromaius novaehollandiae	Emu	Europe	Norway	FALSE			Australia	2	2	0	0	0	0	0	4	2	2	4	1:1	0.5
1112	Casuariidae	Dromaius novaehollandiae	Emu	Europe	Poland	FALSE			Australia	0	0	0	0	3	0	0	3	3	0	3	#DIV/0!	1
1113	Casuariidae	Dromaius novaehollandiae	Emu	Europe	Poland	FALSE			Australia	4	4	0	0	0	0	0	8	4	4	8	1:1	0.5
1115	Casuariidae	Dromaius novaehollandiae	Emu	Europe	Poland	FALSE			Australia	1	1	0	0	0	0	0	2	1	1	2	1:1	0.5
1116	Casuariidae	Dromaius novaehollandiae	Emu	Europe	Poland	FALSE			Australia	1	1	0	0	0	0	0	2	1	1	2	1:1	0.5
1117	Casuariidae	Dromaius novaehollandiae	Emu	Europe	Poland	FALSE			Australia	1	1	0	0	0	0	0	2	1	1	2	1:1	0.5
1118	Casuariidae	Dromaius novaehollandiae	Emu	Europe	Poland	FALSE			Australia	2	0	0	0	0	0	0	2	2	0	2	#DIV/0!	1
1119	Casuariidae	Dromaius novaehollandiae	Emu	Europe	Poland	FALSE			Australia	3	1	0	0	0	0	0	4	3	1	4	3:1	0.75
1120	Casuariidae	Dromaius novaehollandiae	Emu	Europe	Poland	FALSE			Australia	1	1	0	0	0	0	0	2	1	1	2	1:1	0.5
1121	Casuariidae	Dromaius novaehollandiae	Emu	Europe	Poland	FALSE			Australia	2	2	0	0	0	0	0	4	2	2	4	1:1	0.5
1122	Casuariidae	Dromaius novaehollandiae	Emu	Europe	Portugal	FALSE			Australia	0	2	0	0	0	0	0	2	0	2	2	0:1	0
1123	Casuariidae	Dromaius novaehollandiae	Emu	Europe	Portugal	FALSE			Australia	3	0	0	0	0	0	0	3	3	0	3	#DIV/0!	1
1124	Casuariidae	Dromaius novaehollandiae	Emu	Europe	Portugal	FALSE			Australia	1	1	0	0	0	0	0	2	1	1	2	1:1	0.5
1125	Casuariidae	Dromaius novaehollandiae	Emu	Europe	Portugal	FALSE			Australia	2	1	2	0	0	0	0	5	2	1	3	2:1	0.666667
1126	Casuariidae	Dromaius novaehollandiae	Emu	Europe	Portugal	FALSE			Australia	1	1	0	0	0	0	0	2	1	1	2	1:1	0.5
1127	Casuariidae	Dromaius novaehollandiae	Emu	Europe	Portugal	FALSE			Australia	1	0	0	0	0	0	0	1	1	0	1	#DIV/0!	1
1128	Casuariidae	Dromaius novaehollandiae	Emu	Europe	Portugal	FALSE			Australia	1	2	0	0	0	0	0	3	1	2	3	0.5:1	0.333333
1129	Casuariidae	Dromaius novaehollandiae	Emu	Europe	Romania	FALSE			Australia	1	1	0	0	1	2	2	7	2	3	5	0.7:1	0.4
1130	Casuariidae	Dromaius novaehollandiae	Emu	Europe	Romania	FALSE			Australia	1	1	1	0	0	0	0	3	1	1	2	1:1	0.5
1131	Casuariidae	Dromaius novaehollandiae	Emu	Europe	Romania	FALSE			Australia	1	0	0	0	0	0	0	1	1	0	1	#DIV/0!	1
1132	Casuariidae	Dromaius novaehollandiae	Emu	Europe	Romania	FALSE			Australia	1	0	0	0	0	0	0	1	1	0	1	#DIV/0!	1
1133	Casuariidae	Dromaius novaehollandiae	Emu	Europe	Russian Federation	FALSE			Australia	1	1	0	0	0	0	0	2	1	1	2	1:1	0.5
1134	Casuariidae	Dromaius novaehollandiae	Emu	Europe	Russian Federation	FALSE			Australia	2	0	0	0	0	0	0	2	2	0	2	#DIV/0!	1
1135	Casuariidae	Dromaius novaehollandiae	Emu	Europe	Russian Federation	FALSE			Australia	1	2	0	0	0	0	0	3	1	2	3	0.5:1	0.333333
1136	Casuariidae	Dromaius novaehollandiae	Emu	Europe	Russian Federation	FALSE			Australia	1	0	0	0	0	0	0	1	1	0	1	#DIV/0!	1
1137	Casuariidae	Dromaius novaehollandiae	Emu	Europe	Russian Federation	FALSE			Australia	0	1	0	0	0	0	0	1	0	1	1	0:1	0
1138	Casuariidae	Dromaius novaehollandiae	Emu	Europe	Russian Federation	FALSE			Australia	1	1	0	0	0	0	0	2	1	1	2	1:1	0.5
1139	Casuariidae	Dromaius novaehollandiae	Emu	Europe	Russian Federation	FALSE			Australia	1	1	0	0	0	0	0	2	1	1	2	1:1	0.5
1140	Casuariidae	Dromaius novaehollandiae	Emu	Europe	Russian Federation	FALSE			Australia	3	1	0	0	0	0	0	4	3	1	4	3:1	0.75
1141	Casuariidae	Dromaius novaehollandiae	Emu	Europe	Russian Federation	FALSE			Australia	0	0	0	0	1	0	0	1	1	0	1	#DIV/0!	1
1143	Casuariidae	Dromaius novaehollandiae	Emu	Europe	Serbia	FALSE			Australia	1	1	0	0	0	0	0	2	1	1	2	1:1	0.5
1144	Casuariidae	Dromaius novaehollandiae	Emu	Europe	Slovakia	FALSE			Australia	2	0	0	0	0	0	0	2	2	0	2	#DIV/0!	1
1145	Casuariidae	Dromaius novaehollandiae	Emu	Europe	Slovakia	FALSE			Australia	2	2	0	1	0	0	0	4	2	2	4	1:1	0.5
1146	Casuariidae	Dromaius novaehollandiae	Emu	Europe	Slovenia	FALSE			Australia	0	2	0	0	0	0	0	2	0	2	2	0:1	0
1147	Casuariidae	Dromaius novaehollandiae	Emu	Europe	Spain	FALSE			Australia	0	3	0	0	0	0	0	3	0	3	3	0:1	0
1148	Casuariidae	Dromaius novaehollandiae	Emu	Europe	Spain	FALSE			Australia	0	2	0	0	0	0	0	2	0	2	2	0:1	0
1149	Casuariidae	Dromaius novaehollandiae	Emu	Europe	Spain	FALSE			Australia	2	2	2	0	0	0	0	6	2	2	4	1:1	0.5
1151	Casuariidae	Dromaius novaehollandiae	Emu	Europe	Spain	FALSE			Australia	1	1	0	0	0	0	0	2	1	1	2	1:1	0.5
1152	Casuariidae	Dromaius novaehollandiae	Emu	Europe	Spain	FALSE			Australia	1	1	0	0	0	0	0	2	1	1	2	1:1	0.5
1153	Casuariidae	Dromaius novaehollandiae	Emu	Europe	Spain	FALSE			Australia	0	1	7	0	0	0	0	8	0	1	1	0:1	0
1154	Casuariidae	Dromaius novaehollandiae	Emu	Europe	Spain	FALSE			Australia	0	1	0	0	0	0	0	1	0	1	1	0:1	0
1157	Casuariidae	Dromaius novaehollandiae	Emu	Europe	Spain	FALSE			Australia	1	1	0	0	0	0	0	2	1	1	2	1:1	0.5
1158	Casuariidae	Dromaius novaehollandiae	Emu	Europe	Spain	FALSE			Australia	1	2	0	0	0	0	0	3	1	2	3	0.5:1	0.333333
1159	Casuariidae	Dromaius novaehollandiae	Emu	Europe	Sweden	FALSE			Australia	1	0	0	0	0	0	0	1	1	0	1	#DIV/0!	1
1160	Casuariidae	Dromaius novaehollandiae	Emu	Europe	Sweden	FALSE			Australia	1	1	0	0	0	0	0	2	1	1	2	1:1	0.5
1161	Casuariidae	Dromaius novaehollandiae	Emu	Europe	Switzerland	FALSE			Australia	1	1	0	0	0	0	0	2	1	1	2	1:1	0.5
1162	Casuariidae	Dromaius novaehollandiae	Emu	Europe	Switzerland	FALSE			Australia	0	2	0	0	0	0	0	2	0	2	2	0:1	0
1163	Casuariidae	Dromaius novaehollandiae	Emu	Europe	Ukraine	FALSE			Australia	1	0	0	0	0	0	0	1	1	0	1	#DIV/0!	1
1164	Casuariidae	Dromaius novaehollandiae	Emu	Europe	Ukraine	FALSE			Australia	1	0	0	0	0	0	0	1	1	0	1	#DIV/0!	1
1165	Casuariidae	Dromaius novaehollandiae	Emu	Europe	Ukraine	FALSE			Australia	0	2	0	0	0	0	0	2	0	2	2	0:1	0
1166	Casuariidae	Dromaius novaehollandiae	Emu	Europe	Ukraine	FALSE			Australia	4	1	0	0	0	0	0	5	4	1	5	4:1	0.8
1167	Casuariidae	Dromaius novaehollandiae	Emu	Europe	Ukraine	FALSE			Australia	1	1	0	0	0	0	0	2	1	1	2	1:1	0.5
1168	Casuariidae	Dromaius novaehollandiae	Emu	Europe	United Kingdom	FALSE			Australia	2	0	0	0	0	0	0	2	2	0	2	#DIV/0!	1
1169	Casuariidae	Dromaius novaehollandiae	Emu	Europe	United Kingdom	FALSE			Australia	1	1	0	0	0	0	0	2	1	1	2	1:1	0.5
1170	Casuariidae	Dromaius novaehollandiae	Emu	Europe	United Kingdom	FALSE			Australia	1	1	0	0	0	0	0	2	1	1	2	1:1	0.5
1171	Casuariidae	Dromaius novaehollandiae	Emu	Europe	United Kingdom	FALSE			Australia	1	1	0	0	0	0	0	2	1	1	2	1:1	0.5
1172	Casuariidae	Dromaius novaehollandiae	Emu	Europe	United Kingdom	FALSE			Australia	0	2	0	0	0	0	0	2	0	2	2	0:1	0
1173	Casuariidae	Dromaius novaehollandiae	Emu	Europe	United Kingdom	FALSE			Australia	1	2	0	0	0	0	0	3	1	2	3	0.5:1	0.333333
1174	Casuariidae	Dromaius novaehollandiae	Emu	Europe	United Kingdom	FALSE			Australia	1	0	0	0	0	0	0	1	1	0	1	#DIV/0!	1
1175	Casuariidae	Dromaius novaehollandiae	Emu	Europe	United Kingdom	FALSE			Australia	2	1	0	0	0	0	0	3	2	1	3	2:1	0.666667
1176	Casuariidae	Dromaius novaehollandiae	Emu	Europe	United Kingdom	FALSE			Australia	1	1	0	0	0	0	0	2	1	1	2	1:1	0.5
1177	Casuariidae	Dromaius novaehollandiae	Emu	Europe	United Kingdom	FALSE			Australia	1	1	0	0	0	0	0	2	1	1	2	1:1	0.5
1178	Casuariidae	Dromaius novaehollandiae	Emu	Europe	United Kingdom	FALSE			Australia	1	1	0	0	0	0	0	2	1	1	2	1:1	0.5
1179	Casuariidae	Dromaius novaehollandiae	Emu	Europe	United Kingdom	FALSE			Australia	0	1	0	0	0	0	0	1	0	1	1	0:1	0
1180	Casuariidae	Dromaius novaehollandiae	Emu	Europe	United Kingdom	FALSE			Australia	1	0	4	0	0	0	0	5	1	0	1	#DIV/0!	1
1181	Casuariidae	Dromaius novaehollandiae	Emu	Europe	United Kingdom	FALSE			Australia	1	1	1	0	0	0	0	3	1	1	2	1:1	0.5
1182	Casuariidae	Dromaius novaehollandiae	Emu	Europe	United Kingdom	FALSE			Australia	1	0	0	0	0	0	0	1	1	0	1	#DIV/0!	1
1183	Casuariidae	Dromaius novaehollandiae	Emu	Europe	United Kingdom	FALSE			Australia	1	1	3	0	0	0	0	5	1	1	2	1:1	0.5
1184	Casuariidae	Dromaius novaehollandiae	Emu	Europe	United Kingdom	FALSE			Australia	1	1	0	0	0	0	0	2	1	1	2	1:1	0.5
1186	Casuariidae	Dromaius novaehollandiae	Emu	Europe	United Kingdom	FALSE			Australia	2	0	0	0	0	0	0	2	2	0	2	#DIV/0!	1
1187	Casuariidae	Dromaius novaehollandiae	Emu	Europe	United Kingdom	FALSE			Australia	2	2	0	0	0	0	0	4	2	2	4	1:1	0.5
1188	Casuariidae	Dromaius novaehollandiae	Emu	Europe	United Kingdom	FALSE			Australia	1	1	0	0	0	0	0	2	1	1	2	1:1	0.5
1189	Casuariidae	Dromaius novaehollandiae	Emu	Europe	United Kingdom	FALSE			Australia	1	0	0	0	0	0	0	1	1	0	1	#DIV/0!	1
1190	Casuariidae	Dromaius novaehollandiae	Emu	Europe	United Kingdom	FALSE			Australia	0	2	0	0	0	0	0	2	0	2	2	0:1	0
1191	Casuariidae	Dromaius novaehollandiae	Emu	Europe	United Kingdom	FALSE			Australia	1	0	4	0	0	0	0	5	1	0	1	#DIV/0!	1
1192	Casuariidae	Dromaius novaehollandiae	Emu	Europe	United Kingdom	FALSE			Australia	0	2	0	0	0	0	0	2	0	2	2	0:1	0
1193	Casuariidae	Dromaius novaehollandiae	Emu	Europe	United Kingdom	FALSE			Australia	1	1	0	2	0	0	0	2	1	1	2	1:1	0.5
1194	Casuariidae	Dromaius novaehollandiae	Emu	Europe	United Kingdom	FALSE			Australia	2	2	0	0	0	0	0	4	2	2	4	1:1	0.5
1195	Casuariidae	Dromaius novaehollandiae	Emu	Europe	United Kingdom	FALSE			Australia	1	0	0	0	0	0	0	1	1	0	1	#DIV/0!	1
1196	Casuariidae	Dromaius novaehollandiae	Emu	Europe	United Kingdom	FALSE			Australia	2	1	0	0	0	0	0	3	2	1	3	2:1	0.666667
1197	Casuariidae	Dromaius novaehollandiae	Emu	Europe	United Kingdom	FALSE			Australia	1	0	0	0	0	0	3	4	1	0	1	#DIV/0!	1
1198	Casuariidae	Dromaius novaehollandiae	Emu	Europe	United Kingdom	FALSE			Australia	0	2	1	0	0	0	0	3	0	2	2	0:1	0
1199	Casuariidae	Dromaius novaehollandiae	Emu	Europe	United Kingdom	FALSE			Australia	1	2	0	0	0	0	0	3	1	2	3	0.5:1	0.333333
1200	Casuariidae	Dromaius novaehollandiae	Emu	Europe	United Kingdom	FALSE			Australia	1	2	0	0	0	0	0	3	1	2	3	0.5:1	0.333333
1201	Casuariidae	Dromaius novaehollandiae	Emu	Europe	United Kingdom	FALSE			Australia	2	0	0	0	0	0	0	2	2	0	2	#DIV/0!	1
1202	Casuariidae	Dromaius novaehollandiae	Emu	Europe	United Kingdom	FALSE			Australia	1	2	0	0	0	0	0	3	1	2	3	0.5:1	0.333333
1203	Casuariidae	Dromaius novaehollandiae	Emu	Europe	United Kingdom	FALSE			Australia	0	0	0	0	2	0	0	2	2	0	2	#DIV/0!	1
1204	Casuariidae	Dromaius novaehollandiae	Emu	Europe	United Kingdom	FALSE			Australia	0	1	0	0	0	0	0	1	0	1	1	0:1	0
1205	Casuariidae	Dromaius novaehollandiae	Emu	Europe	United Kingdom	FALSE			Australia	1	1	0	0	0	0	0	2	1	1	2	1:1	0.5
1208	Casuariidae	Dromaius novaehollandiae	Emu	North America	Canada	FALSE			Australia	2	2	0	0	0	0	0	4	2	2	4	1:1	0.5
1209	Casuariidae	Dromaius novaehollandiae	Emu	North America	Canada	FALSE			Australia	0	2	0	0	0	0	0	2	0	2	2	0:1	0
1210	Casuariidae	Dromaius novaehollandiae	Emu	North America	Canada	FALSE			Australia	1	1	0	0	0	0	0	2	1	1	2	1:1	0.5
1211	Casuariidae	Dromaius novaehollandiae	Emu	North America	Canada	FALSE			Australia	1	3	0	0	0	0	0	4	1	3	4	0.3:1	0.25
1212	Casuariidae	Dromaius novaehollandiae	Emu	North America	Canada	FALSE			Australia	1	1	0	0	0	0	0	2	1	1	2	1:1	0.5
1213	Casuariidae	Dromaius novaehollandiae	Emu	North America	Canada	FALSE			Australia	1	1	0	0	0	0	0	2	1	1	2	1:1	0.5
1214	Casuariidae	Dromaius novaehollandiae	Emu	North America	Costa Rica	FALSE			Australia	1	2	0	0	0	0	0	3	1	2	3	0.5:1	0.333333
1215	Casuariidae	Dromaius novaehollandiae	Emu	North America	Dominican Republic	FALSE			Australia	2	4	0	0	0	0	0	6	2	4	6	0.5:1	0.333333
1216	Casuariidae	Dromaius novaehollandiae	Emu	North America	Guatemala	FALSE			Australia	2	3	0	0	0	0	6	11	2	3	5	0.7:1	0.4
1217	Casuariidae	Dromaius novaehollandiae	Emu	North America	Mexico	FALSE			Australia	1	0	3	0	0	0	0	4	1	0	1	#DIV/0!	1
1218	Casuariidae	Dromaius novaehollandiae	Emu	North America	Mexico	FALSE			Australia	1	1	0	0	0	0	0	2	1	1	2	1:1	0.5
1219	Casuariidae	Dromaius novaehollandiae	Emu	North America	Mexico	FALSE			Australia	3	0	9	1	0	0	0	12	3	0	3	#DIV/0!	1
1220	Casuariidae	Dromaius novaehollandiae	Emu	North America	Mexico	FALSE			Australia	2	0	1	0	0	0	0	3	2	0	2	#DIV/0!	1
1221	Casuariidae	Dromaius novaehollandiae	Emu	North America	Mexico	FALSE			Australia	2	2	4	4	0	0	0	8	2	2	4	1:1	0.5
1222	Casuariidae	Dromaius novaehollandiae	Emu	North America	United States	FALSE			Australia	2	0	0	0	0	0	0	2	2	0	2	#DIV/0!	1
1223	Casuariidae	Dromaius novaehollandiae	Emu	North America	United States	FALSE			Australia	1	1	0	0	0	0	0	2	1	1	2	1:1	0.5
1224	Casuariidae	Dromaius novaehollandiae	Emu	North America	United States	FALSE			Australia	0	0	0	0	9	9	0	18	9	9	18	1:1	0.5
1225	Casuariidae	Dromaius novaehollandiae	Emu	North America	United States	FALSE			Australia	1	1	0	0	0	0	0	2	1	1	2	1:1	0.5
1227	Casuariidae	Dromaius novaehollandiae	Emu	North America	United States	FALSE			Australia	1	0	0	0	0	0	0	1	1	0	1	#DIV/0!	1
1228	Casuariidae	Dromaius novaehollandiae	Emu	North America	United States	FALSE			Australia	1	1	0	0	0	0	0	2	1	1	2	1:1	0.5
1229	Casuariidae	Dromaius novaehollandiae	Emu	North America	United States	FALSE			Australia	1	3	0	0	0	0	0	4	1	3	4	0.3:1	0.25
1230	Casuariidae	Dromaius novaehollandiae	Emu	North America	United States	FALSE			Australia	1	1	0	0	0	0	0	2	1	1	2	1:1	0.5
1231	Casuariidae	Dromaius novaehollandiae	Emu	North America	United States	FALSE			Australia	0	2	0	0	0	0	0	2	0	2	2	0:1	0
1232	Casuariidae	Dromaius novaehollandiae	Emu	North America	United States	FALSE			Australia	0	3	0	0	0	0	0	3	0	3	3	0:1	0
1233	Casuariidae	Dromaius novaehollandiae	Emu	North America	United States	FALSE			Australia	2	1	0	0	0	0	0	3	2	1	3	2:1	0.666667
1234	Casuariidae	Dromaius novaehollandiae	Emu	North America	United States	FALSE			Australia	1	0	0	0	0	0	0	1	1	0	1	#DIV/0!	1
1236	Casuariidae	Dromaius novaehollandiae	Emu	North America	United States	FALSE			Australia	2	0	0	0	0	0	0	2	2	0	2	#DIV/0!	1
1237	Casuariidae	Dromaius novaehollandiae	Emu	North America	United States	FALSE			Australia	0	1	0	0	0	0	0	1	0	1	1	0:1	0
1238	Casuariidae	Dromaius novaehollandiae	Emu	North America	United States	FALSE			Australia	2	0	0	0	0	0	0	2	2	0	2	#DIV/0!	1
1239	Casuariidae	Dromaius novaehollandiae	Emu	North America	United States	FALSE			Australia	2	0	0	0	0	0	0	2	2	0	2	#DIV/0!	1
1240	Casuariidae	Dromaius novaehollandiae	Emu	North America	United States	FALSE			Australia	1	2	0	0	0	0	0	3	1	2	3	0.5:1	0.333333
1241	Casuariidae	Dromaius novaehollandiae	Emu	North America	United States	FALSE			Australia	0	2	0	0	0	0	0	2	0	2	2	0:1	0
1242	Casuariidae	Dromaius novaehollandiae	Emu	North America	United States	FALSE			Australia	1	0	0	0	0	0	0	1	1	0	1	#DIV/0!	1
1243	Casuariidae	Dromaius novaehollandiae	Emu	North America	United States	FALSE			Australia	3	5	0	0	0	0	0	8	3	5	8	0.6:1	0.375
1244	Casuariidae	Dromaius novaehollandiae	Emu	North America	United States	FALSE			Australia	0	2	0	0	0	0	0	2	0	2	2	0:1	0
1245	Casuariidae	Dromaius novaehollandiae	Emu	North America	United States	FALSE			Australia	1	0	0	0	0	0	0	1	1	0	1	#DIV/0!	1
1246	Casuariidae	Dromaius novaehollandiae	Emu	North America	United States	FALSE			Australia	1	1	0	0	0	0	0	2	1	1	2	1:1	0.5
1247	Casuariidae	Dromaius novaehollandiae	Emu	North America	United States	FALSE			Australia	1	1	0	0	0	0	0	2	1	1	2	1:1	0.5
1248	Casuariidae	Dromaius novaehollandiae	Emu	North America	United States	FALSE			Australia	2	0	0	0	0	0	0	2	2	0	2	#DIV/0!	1
1249	Casuariidae	Dromaius novaehollandiae	Emu	North America	United States	FALSE			Australia	0	0	0	0	1	1	0	2	1	1	2	1:1	0.5
1250	Casuariidae	Dromaius novaehollandiae	Emu	North America	United States	FALSE			Australia	1	0	0	0	0	0	0	1	1	0	1	#DIV/0!	1
1251	Casuariidae	Dromaius novaehollandiae	Emu	North America	United States	FALSE			Australia	5	3	0	0	0	0	0	8	5	3	8	1.7:1	0.625
1253	Casuariidae	Dromaius novaehollandiae	Emu	North America	United States	FALSE			Australia	2	0	0	0	0	0	0	2	2	0	2	#DIV/0!	1
1254	Casuariidae	Dromaius novaehollandiae	Emu	North America	United States	FALSE			Australia	2	2	0	0	0	0	0	4	2	2	4	1:1	0.5
1256	Casuariidae	Dromaius novaehollandiae	Emu	North America	United States	FALSE			Australia	1	1	0	0	0	0	0	2	1	1	2	1:1	0.5
1257	Casuariidae	Dromaius novaehollandiae	Emu	North America	United States	FALSE			Australia	1	1	0	0	0	0	0	2	1	1	2	1:1	0.5
1258	Casuariidae	Dromaius novaehollandiae	Emu	North America	United States	FALSE			Australia	2	1	0	0	0	0	0	3	2	1	3	2:1	0.666667
1259	Casuariidae	Dromaius novaehollandiae	Emu	North America	United States	FALSE			Australia	0	1	2	0	0	0	0	3	0	1	1	0:1	0
1260	Casuariidae	Dromaius novaehollandiae	Emu	North America	United States	FALSE			Australia	1	0	0	0	0	0	0	1	1	0	1	#DIV/0!	1
1261	Casuariidae	Dromaius novaehollandiae	Emu	North America	United States	FALSE			Australia	1	0	3	0	0	0	0	4	1	0	1	#DIV/0!	1
1262	Casuariidae	Dromaius novaehollandiae	Emu	North America	United States	FALSE			Australia	2	0	0	0	0	0	0	2	2	0	2	#DIV/0!	1
1263	Casuariidae	Dromaius novaehollandiae	Emu	North America	United States	FALSE			Australia	1	1	0	0	0	0	0	2	1	1	2	1:1	0.5
1264	Casuariidae	Dromaius novaehollandiae	Emu	North America	United States	FALSE			Australia	1	1	0	0	0	0	0	2	1	1	2	1:1	0.5
1265	Casuariidae	Dromaius novaehollandiae	Emu	North America	United States	FALSE			Australia	0	2	0	0	0	0	0	2	0	2	2	0:1	0
1266	Casuariidae	Dromaius novaehollandiae	Emu	North America	United States	FALSE			Australia	1	1	0	0	0	0	0	2	1	1	2	1:1	0.5
1268	Casuariidae	Dromaius novaehollandiae	Emu	North America	United States	FALSE			Australia	0	1	0	0	0	0	0	1	0	1	1	0:1	0
1270	Casuariidae	Dromaius novaehollandiae	Emu	North America	United States	FALSE			Australia	2	0	0	0	0	0	0	2	2	0	2	#DIV/0!	1
1271	Casuariidae	Dromaius novaehollandiae	Emu	North America	United States	FALSE			Australia	0	1	0	0	0	0	0	1	0	1	1	0:1	0
1272	Casuariidae	Dromaius novaehollandiae	Emu	North America	United States	FALSE			Australia	2	2	0	0	0	0	0	4	2	2	4	1:1	0.5
1273	Casuariidae	Dromaius novaehollandiae	Emu	North America	United States	FALSE			Australia	1	1	0	0	0	0	0	2	1	1	2	1:1	0.5
1274	Casuariidae	Dromaius novaehollandiae	Emu	North America	United States	FALSE			Australia	1	3	0	0	0	0	0	4	1	3	4	0.3:1	0.25
1275	Casuariidae	Dromaius novaehollandiae	Emu	North America	United States	FALSE			Australia	1	2	0	0	0	0	0	3	1	2	3	0.5:1	0.333333
1276	Casuariidae	Dromaius novaehollandiae	Emu	North America	United States	FALSE			Australia	4	0	0	0	0	0	0	4	4	0	4	#DIV/0!	1
1277	Casuariidae	Dromaius novaehollandiae	Emu	North America	United States	FALSE			Australia	1	1	0	0	0	0	0	2	1	1	2	1:1	0.5
1278	Casuariidae	Dromaius novaehollandiae	Emu	North America	United States	FALSE			Australia	1	1	0	0	0	0	0	2	1	1	2	1:1	0.5
1279	Casuariidae	Dromaius novaehollandiae	Emu	North America	United States	FALSE			Australia	1	1	0	0	0	0	0	2	1	1	2	1:1	0.5
1280	Casuariidae	Dromaius novaehollandiae	Emu	North America	United States	FALSE			Australia	0	1	0	0	0	0	0	1	0	1	1	0:1	0
1281	Casuariidae	Dromaius novaehollandiae	Emu	North America	United States	FALSE			Australia	1	0	0	0	0	0	0	1	1	0	1	#DIV/0!	1
1282	Casuariidae	Dromaius novaehollandiae	Emu	North America	United States	FALSE			Australia	1	0	0	0	0	0	0	1	1	0	1	#DIV/0!	1
1283	Casuariidae	Dromaius novaehollandiae	Emu	North America	United States	FALSE			Australia	1	0	0	0	0	0	0	1	1	0	1	#DIV/0!	1
1284	Casuariidae	Dromaius novaehollandiae	Emu	North America	United States	FALSE			Australia	1	0	0	0	0	0	0	1	1	0	1	#DIV/0!	1
1285	Casuariidae	Dromaius novaehollandiae	Emu	North America	United States	FALSE			Australia	1	0	0	0	0	0	0	1	1	0	1	#DIV/0!	1
1286	Casuariidae	Dromaius novaehollandiae	Emu	North America	United States	FALSE			Australia	1	0	0	0	0	0	0	1	1	0	1	#DIV/0!	1
1287	Casuariidae	Dromaius novaehollandiae	Emu	North America	United States	FALSE			Australia	1	0	0	0	0	0	0	1	1	0	1	#DIV/0!	1
1288	Casuariidae	Dromaius novaehollandiae	Emu	North America	United States	FALSE			Australia	0	1	0	0	0	0	0	1	0	1	1	0:1	0
1289	Casuariidae	Dromaius novaehollandiae	Emu	North America	United States	FALSE			Australia	0	2	0	0	0	0	0	2	0	2	2	0:1	0
1290	Casuariidae	Dromaius novaehollandiae	Emu	North America	United States	FALSE			Australia	0	1	0	0	0	0	0	1	0	1	1	0:1	0
1291	Casuariidae	Dromaius novaehollandiae	Emu	North America	United States	FALSE			Australia	2	0	0	0	0	0	0	2	2	0	2	#DIV/0!	1
1292	Casuariidae	Dromaius novaehollandiae	Emu	North America	United States	FALSE			Australia	1	1	0	0	0	0	0	2	1	1	2	1:1	0.5
1293	Casuariidae	Dromaius novaehollandiae	Emu	North America	United States	FALSE			Australia	0	0	0	0	4	4	34	42	4	4	8	1:1	0.5
1294	Casuariidae	Dromaius novaehollandiae	Emu	North America	United States	FALSE			Australia	1	0	0	0	0	0	0	1	1	0	1	#DIV/0!	1
1295	Casuariidae	Dromaius novaehollandiae	Emu	North America	United States	FALSE			Australia	1	1	0	0	0	0	0	2	1	1	2	1:1	0.5
1296	Casuariidae	Dromaius novaehollandiae	Emu	North America	United States	FALSE			Australia	0	2	0	0	0	0	0	2	0	2	2	0:1	0
1297	Casuariidae	Dromaius novaehollandiae	Emu	North America	United States	FALSE			Australia	0	0	0	0	6	10	8	24	6	10	16	0.6:1	0.375
1298	Casuariidae	Dromaius novaehollandiae	Emu	North America	United States	FALSE			Australia	2	0	0	0	0	0	0	2	2	0	2	#DIV/0!	1
1299	Casuariidae	Dromaius novaehollandiae	Emu	North America	United States	FALSE			Australia	1	1	0	0	0	0	0	2	1	1	2	1:1	0.5
1300	Casuariidae	Dromaius novaehollandiae	Emu	North America	United States	FALSE			Australia	1	1	0	0	0	0	0	2	1	1	2	1:1	0.5
1301	Casuariidae	Dromaius novaehollandiae	Emu	North America	United States	FALSE			Australia	3	2	5	0	0	0	0	10	3	2	5	1.5:1	0.6
1302	Casuariidae	Dromaius novaehollandiae	Emu	North America	United States	FALSE			Australia	1	0	0	0	0	0	0	1	1	0	1	#DIV/0!	1
1303	Casuariidae	Dromaius novaehollandiae	Emu	North America	United States	FALSE			Australia	3	3	0	0	0	0	0	6	3	3	6	1:1	0.5
1304	Casuariidae	Dromaius novaehollandiae	Emu	South America	Argentina	FALSE			Australia	0	1	0	0	0	0	0	1	0	1	1	0:1	0
1305	Casuariidae	Dromaius novaehollandiae	Emu	South America	Brazil	FALSE			Australia	2	6	0	0	0	0	0	8	2	6	8	0.3:1	0.25
1306	Casuariidae	Dromaius novaehollandiae	Emu	South America	Brazil	FALSE			Australia	6	1	2	0	0	0	0	9	6	1	7	6:1	0.857143
1307	Casuariidae	Dromaius novaehollandiae	Emu	South America	Chile	FALSE			Australia	2	6	5	5	0	0	0	13	2	6	8	0.3:1	0.25
1308	Casuariidae	Dromaius novaehollandiae	Emu	South America	Chile	FALSE			Australia	2	2	0	0	0	0	0	4	2	2	4	1:1	0.5
1309	Casuariidae	Dromaius novaehollandiae	Emu	South America	Colombia	FALSE			Australia	0	2	0	0	0	0	0	2	0	2	2	0:1	0
1310	Casuariidae	Dromaius novaehollandiae	Emu	South America	Colombia	FALSE			Australia	3	1	0	0	0	0	0	4	3	1	4	3:1	0.75
1311	Casuariidae	Dromaius novaehollandiae	Emu	South America	Colombia	FALSE			Australia	0	1	0	0	0	0	0	1	0	1	1	0:1	0
1312	Casuariidae	Dromaius novaehollandiae	Emu	South America	Colombia	FALSE			Australia	2	1	2	0	0	0	0	5	2	1	3	2:1	0.666667
1313	Casuariidae	Dromaius novaehollandiae	Emu	South America	Ecuador	FALSE			Australia	0	1	0	0	0	0	0	1	0	1	1	0:1	0
1314	Casuariidae	Dromaius novaehollandiae	Emu	Africa	Mauritius	FALSE			Australia	1	0	0	0	0	0	0	1	1	0	1	#DIV/0!	1
1315	Casuariidae	Dromaius novaehollandiae	Emu	Asia	Sri Lanka	FALSE			Australia	0	1	0	0	0	0	0	1	0	1	1	0:1	0
1316	Casuariidae	Dromaius novaehollandiae	Emu	Australia (Oceania)	Australia	FALSE			Australia	2	0	0	0	0	0	0	2	2	0	2	#DIV/0!	1
1318	Casuariidae	Dromaius novaehollandiae	Emu	Australia (Oceania)	Australia	FALSE			Australia	0	2	0	0	0	0	0	2	0	2	2	0:1	0
1319	Casuariidae	Dromaius novaehollandiae	Emu	Australia (Oceania)	Australia	FALSE			Australia	2	1	3	1	0	0	0	6	2	1	3	2:1	0.666667
1321	Casuariidae	Dromaius novaehollandiae	Emu	Australia (Oceania)	Australia	FALSE			Australia	6	5	2	0	0	0	0	13	6	5	11	1.2:1	0.545455
1322	Casuariidae	Dromaius novaehollandiae	Emu	Australia (Oceania)	New Zealand	FALSE			Australia	1	0	0	0	0	0	0	1	1	0	1	#DIV/0!	1
1324	Casuariidae	Dromaius novaehollandiae	Emu	North America	United States	FALSE			Australia	0	1	0	0	0	0	0	1	0	1	1	0:1	0
1325	Apterygidae	Apteryx australis	Brown kiwi	Australia (Oceania)	New Zealand	TRUE			NEW ZEALAND	0	1	0	0	0	0	0	1	0	1	1	0:1	0
1326	Apterygidae	Apteryx mantelli	Brown kiwi	Asia	Japan	FALSE			<p>North Island (New Zealand)</p>	1	1	0	0	0	0	0	2	1	1	2	1:1	0.5
1327	Apterygidae	Apteryx mantelli	Brown kiwi	Australia (Oceania)	New Zealand	TRUE			<p>North Island (New Zealand)</p>	4	2	1	1	0	0	0	7	4	2	6	2:1	0.666667
1328	Apterygidae	Apteryx mantelli	Brown kiwi	Australia (Oceania)	New Zealand	TRUE			<p>North Island (New Zealand)</p>	0	1	0	0	0	0	0	1	0	1	1	0:1	0
1329	Apterygidae	Apteryx mantelli	Brown kiwi	Australia (Oceania)	New Zealand	TRUE			<p>North Island (New Zealand)</p>	3	2	12	1	0	0	0	17	3	2	5	1.5:1	0.6
1330	Apterygidae	Apteryx mantelli	Brown kiwi	Australia (Oceania)	New Zealand	TRUE			<p>North Island (New Zealand)</p>	80	2	0	1	0	0	0	82	80	2	82	40:1	0.97561
1331	Apterygidae	Apteryx mantelli	Brown kiwi	Australia (Oceania)	New Zealand	TRUE			<p>North Island (New Zealand)</p>	3	2	5	2	0	0	0	10	3	2	5	1.5:1	0.6
1332	Apterygidae	Apteryx mantelli	Brown kiwi	Australia (Oceania)	New Zealand	TRUE			<p>North Island (New Zealand)</p>	4	4	1	2	0	0	0	9	4	4	8	1:1	0.5
1333	Apterygidae	Apteryx mantelli	Brown kiwi	Australia (Oceania)	New Zealand	TRUE			<p>North Island (New Zealand)</p>	8	7	3	5	0	0	0	18	8	7	15	1.1:1	0.533333
1334	Apterygidae	Apteryx mantelli	Brown kiwi	Australia (Oceania)	New Zealand	TRUE			<p>North Island (New Zealand)</p>	0	1	0	0	0	0	0	1	0	1	1	0:1	0
1335	Apterygidae	Apteryx mantelli	Brown kiwi	Europe	Czech Republic	FALSE			<p>North Island (New Zealand)</p>	1	1	0	0	0	0	0	2	1	1	2	1:1	0.5
1336	Apterygidae	Apteryx mantelli	Brown kiwi	Europe	Czech Republic	FALSE			<p>North Island (New Zealand)</p>	1	0	0	0	0	0	0	1	1	0	1	#DIV/0!	1
1337	Apterygidae	Apteryx mantelli	Brown kiwi	Europe	Germany	FALSE			<p>North Island (New Zealand)</p>	3	3	0	0	0	0	0	6	3	3	6	1:1	0.5
1338	Apterygidae	Apteryx mantelli	Brown kiwi	Europe	Germany	FALSE			<p>North Island (New Zealand)</p>	6	5	0	1	0	0	0	11	6	5	11	1.2:1	0.545455
1339	Apterygidae	Apteryx mantelli	Brown kiwi	Europe	Germany	FALSE			<p>North Island (New Zealand)</p>	1	3	0	0	0	0	0	4	1	3	4	0.3:1	0.25
1340	Apterygidae	Apteryx mantelli	Brown kiwi	Europe	Netherlands	FALSE			<p>North Island (New Zealand)</p>	1	1	0	0	0	0	0	2	1	1	2	1:1	0.5
1341	Apterygidae	Apteryx mantelli	Brown kiwi	Europe	United Kingdom	FALSE			<p>North Island (New Zealand)</p>	1	0	0	0	0	0	0	1	1	0	1	#DIV/0!	1
1342	Apterygidae	Apteryx mantelli	Brown kiwi	North America	United States	FALSE			<p>North Island (New Zealand)</p>	1	0	0	0	0	0	0	1	1	0	1	#DIV/0!	1
1343	Apterygidae	Apteryx mantelli	Brown kiwi	North America	United States	FALSE			<p>North Island (New Zealand)</p>	1	1	0	0	0	0	0	2	1	1	2	1:1	0.5
1344	Apterygidae	Apteryx mantelli	Brown kiwi	North America	United States	FALSE			<p>North Island (New Zealand)</p>	1	0	0	0	0	0	0	1	1	0	1	#DIV/0!	1
1345	Apterygidae	Apteryx mantelli	Brown kiwi	North America	United States	FALSE			<p>North Island (New Zealand)</p>	2	0	0	0	0	0	0	2	2	0	2	#DIV/0!	1
1346	Apterygidae	Apteryx mantelli	Brown kiwi	North America	United States	FALSE			<p>North Island (New Zealand)</p>	10	3	0	2	0	0	0	13	10	3	13	3.3:1	0.769231
1347	Apterygidae	Apteryx mantelli	Brown kiwi	North America	United States	FALSE			<p>North Island (New Zealand)</p>	2	1	0	0	0	0	0	3	2	1	3	2:1	0.666667
1348	Apterygidae	Apteryx mantelli	Brown kiwi	North America	United States	FALSE			<p>North Island (New Zealand)</p>	2	1	0	0	0	0	0	3	2	1	3	2:1	0.666667
1349	Apterygidae	Apteryx mantelli	Brown kiwi	North America	United States	FALSE			<p>North Island (New Zealand)</p>	2	1	0	1	0	0	0	3	2	1	3	2:1	0.666667
1350	Apterygidae	Apteryx mantelli	Brown kiwi	North America	United States	FALSE			<p>North Island (New Zealand)</p>	1	0	0	0	0	0	0	1	1	0	1	#DIV/0!	1
1351	Apterygidae	Apteryx mantelli	Brown kiwi	North America	United States	FALSE			<p>North Island (New Zealand)</p>	2	1	0	0	0	0	0	3	2	1	3	2:1	0.666667

## Sheet: Columbi
Sort	Scientific Name	Common Name	Geographical Region	Country	Within range Y/N	Male	Female	Other	Births	Group Male	Group Female	Group Other	Total Count	TOTAL KNOWN MALE	TOTAL KNOWN FEMALE	REVISED TOTAL	Proportion (of males)
30	Alectroenas madagascariensis	Madagascar blue pigeon	Asia	Singapore	FALSE	1	1	0	0	0	0	0	2	1	1	2	0.5
31	Alectroenas madagascariensis	Madagascar blue pigeon	Europe	Czech Republic	FALSE	2	0	0	0	0	0	0	2	2	0	2	1
32	Alectroenas madagascariensis	Madagascar blue pigeon	Europe	Germany	FALSE	1	1	0	0	0	0	0	2	1	1	2	0.5
33	Alectroenas madagascariensis	Madagascar blue pigeon	Europe	Germany	FALSE	8	6	0	0	0	0	0	14	8	6	14	0.571429
34	Aplopelia larvata	Lemon dove	Africa	South Africa	TRUE	1	0	0	0	0	0	0	1	1	0	1	1
35	Aplopelia larvata	Lemon dove	Asia	Cyprus	FALSE	1	0	0	0	0	0	0	1	1	0	1	1
36	Aplopelia larvata	Lemon dove	Asia	Singapore	FALSE	3	0	0	0	0	0	0	3	3	0	3	1
37	Aplopelia larvata	Lemon dove	Europe	France	FALSE	7	4	0	1	0	0	0	11	7	4	11	0.636364
38	Aplopelia larvata	Lemon dove	Europe	United Kingdom	FALSE	1	3	0	0	0	0	0	4	1	3	4	0.25
39	Aplopelia larvata	Lemon dove	Europe	United Kingdom	FALSE	0	0	0	0	1	1	2	4	1	1	2	0.5
46	Caloenas nicobarica	Nicobar pigeon	Africa	South Africa	FALSE	1	1	0	0	0	0	0	2	1	1	2	0.5
47	Caloenas nicobarica	Nicobar pigeon	Africa	South Africa	FALSE	6	3	0	0	0	0	0	9	6	3	9	0.666667
48	Caloenas nicobarica	Nicobar pigeon	Africa	South Africa	FALSE	7	9	2	0	0	0	0	18	7	9	16	0.4375
49	Caloenas nicobarica	Nicobar pigeon	Asia	Hong Kong	FALSE	1	0	34	0	0	0	0	35	1	0	1	1
50	Caloenas nicobarica	Nicobar pigeon	Asia	Hong Kong	FALSE	8	8	20	1	0	0	0	36	8	8	16	0.5
51	Caloenas nicobarica	Nicobar pigeon	Asia	Israel	FALSE	1	4	5	0	0	0	0	10	1	4	5	0.2
52	Caloenas nicobarica	Nicobar pigeon	Asia	Israel	FALSE	1	0	0	0	0	0	0	1	1	0	1	1
53	Caloenas nicobarica	Nicobar pigeon	Asia	Israel	FALSE	2	0	0	0	0	0	0	2	2	0	2	1
54	Caloenas nicobarica	Nicobar pigeon	Asia	Singapore	FALSE	35	35	15	1	10	9	21	125	45	44	89	0.505618
55	Caloenas nicobarica	Nicobar pigeon	Asia	Singapore	FALSE	0	4	0	0	0	0	0	4	0	4	4	0
56	Caloenas nicobarica	Nicobar pigeon	Asia	Taiwan	FALSE	23	10	1	0	0	0	0	34	23	10	33	0.69697
57	Caloenas nicobarica	Nicobar pigeon	Asia	Thailand	TRUE	0	0	0	0	3	1	3	7	3	1	4	0.75
61	Caloenas nicobarica	Nicobar pigeon	Asia	Thailand	TRUE	1	1	0	0	0	0	0	2	1	1	2	0.5
65	Caloenas nicobarica	Nicobar pigeon	Asia	United Arab Emirates	FALSE	1	2	2	0	0	0	0	5	1	2	3	0.333333
67	Caloenas nicobarica	Nicobar pigeon	Australia (Oceania)	Australia	FALSE	14	9	2	1	0	0	0	25	14	9	23	0.608696
68	Caloenas nicobarica	Nicobar pigeon	Australia (Oceania)	Australia	FALSE	8	0	0	0	0	0	0	8	8	0	8	1
69	Caloenas nicobarica	Nicobar pigeon	Australia (Oceania)	Australia	FALSE	13	7	4	0	0	0	0	24	13	7	20	0.65
70	Caloenas nicobarica	Nicobar pigeon	Australia (Oceania)	Australia	FALSE	28	24	6	9	0	0	0	58	28	24	52	0.538462
72	Caloenas nicobarica	Nicobar pigeon	Europe	Austria	FALSE	2	3	0	0	0	0	0	5	2	3	5	0.4
73	Caloenas nicobarica	Nicobar pigeon	Europe	Belgium	FALSE	1	5	2	0	0	0	0	8	1	5	6	0.166667
74	Caloenas nicobarica	Nicobar pigeon	Europe	Belgium	FALSE	2	1	0	0	0	0	0	3	2	1	3	0.666667
75	Caloenas nicobarica	Nicobar pigeon	Europe	Czech Republic	FALSE	3	2	0	1	0	0	0	5	3	2	5	0.6
76	Caloenas nicobarica	Nicobar pigeon	Europe	Czech Republic	FALSE	1	1	0	0	0	0	0	2	1	1	2	0.5
77	Caloenas nicobarica	Nicobar pigeon	Europe	Czech Republic	FALSE	2	1	0	0	0	0	0	3	2	1	3	0.666667
78	Caloenas nicobarica	Nicobar pigeon	Europe	Czech Republic	FALSE	2	1	0	0	0	0	0	3	2	1	3	0.666667
79	Caloenas nicobarica	Nicobar pigeon	Europe	Czech Republic	FALSE	4	2	0	0	0	0	0	6	4	2	6	0.666667
80	Caloenas nicobarica	Nicobar pigeon	Europe	Denmark	FALSE	1	2	1	0	0	0	0	4	1	2	3	0.333333
81	Caloenas nicobarica	Nicobar pigeon	Europe	Denmark	FALSE	2	2	0	0	0	0	0	4	2	2	4	0.5
82	Caloenas nicobarica	Nicobar pigeon	Europe	France	FALSE	1	0	0	0	0	0	0	1	1	0	1	1
83	Caloenas nicobarica	Nicobar pigeon	Europe	France	FALSE	2	3	2	1	0	0	0	7	2	3	5	0.4
84	Caloenas nicobarica	Nicobar pigeon	Europe	France	FALSE	3	0	17	2	0	0	0	20	3	0	3	1
85	Caloenas nicobarica	Nicobar pigeon	Europe	France	FALSE	1	0	0	0	0	0	0	1	1	0	1	1
86	Caloenas nicobarica	Nicobar pigeon	Europe	France	FALSE	3	4	1	0	0	0	0	8	3	4	7	0.428571
87	Caloenas nicobarica	Nicobar pigeon	Europe	France	FALSE	1	2	0	0	0	0	0	3	1	2	3	0.333333
88	Caloenas nicobarica	Nicobar pigeon	Europe	France	FALSE	27	19	1	13	0	0	0	47	27	19	46	0.586957
89	Caloenas nicobarica	Nicobar pigeon	Europe	France	FALSE	3	3	1	1	0	0	0	7	3	3	6	0.5
90	Caloenas nicobarica	Nicobar pigeon	Europe	France	FALSE	1	2	0	0	0	0	0	3	1	2	3	0.333333
91	Caloenas nicobarica	Nicobar pigeon	Europe	France	FALSE	0	1	0	0	0	0	0	1	0	1	1	0
92	Caloenas nicobarica	Nicobar pigeon	Europe	France	FALSE	2	0	17	0	0	0	0	19	2	0	2	1
93	Caloenas nicobarica	Nicobar pigeon	Europe	France	FALSE	4	6	0	1	0	0	0	10	4	6	10	0.4
94	Caloenas nicobarica	Nicobar pigeon	Europe	France	FALSE	1	1	0	0	0	0	0	2	1	1	2	0.5
95	Caloenas nicobarica	Nicobar pigeon	Europe	France	FALSE	0	1	0	0	0	0	0	1	0	1	1	0
96	Caloenas nicobarica	Nicobar pigeon	Europe	Germany	FALSE	1	1	0	0	0	0	0	2	1	1	2	0.5
97	Caloenas nicobarica	Nicobar pigeon	Europe	Germany	FALSE	4	4	0	0	0	0	0	8	4	4	8	0.5
98	Caloenas nicobarica	Nicobar pigeon	Europe	Germany	FALSE	1	1	0	0	0	0	0	2	1	1	2	0.5
99	Caloenas nicobarica	Nicobar pigeon	Europe	Germany	FALSE	1	1	0	0	0	0	0	2	1	1	2	0.5
100	Caloenas nicobarica	Nicobar pigeon	Europe	Germany	FALSE	1	1	0	0	0	0	0	2	1	1	2	0.5
101	Caloenas nicobarica	Nicobar pigeon	Europe	Germany	FALSE	3	3	0	0	0	0	0	6	3	3	6	0.5
102	Caloenas nicobarica	Nicobar pigeon	Europe	Germany	FALSE	2	2	0	0	0	0	0	4	2	2	4	0.5
103	Caloenas nicobarica	Nicobar pigeon	Europe	Germany	FALSE	11	9	0	1	0	0	0	20	11	9	20	0.55
104	Caloenas nicobarica	Nicobar pigeon	Europe	Germany	FALSE	2	2	0	0	0	0	0	4	2	2	4	0.5
105	Caloenas nicobarica	Nicobar pigeon	Europe	Germany	FALSE	0	2	1	0	0	0	0	3	0	2	2	0
106	Caloenas nicobarica	Nicobar pigeon	Europe	Germany	FALSE	14	14	0	0	0	0	0	28	14	14	28	0.5
107	Caloenas nicobarica	Nicobar pigeon	Europe	Greece	FALSE	8	2	2	0	0	0	0	12	8	2	10	0.8
108	Caloenas nicobarica	Nicobar pigeon	Europe	Hungary	FALSE	5	2	0	0	0	0	0	7	5	2	7	0.714286
109	Caloenas nicobarica	Nicobar pigeon	Europe	Hungary	FALSE	1	0	0	0	0	0	0	1	1	0	1	1
110	Caloenas nicobarica	Nicobar pigeon	Europe	Hungary	FALSE	1	2	0	0	0	0	0	3	1	2	3	0.333333
111	Caloenas nicobarica	Nicobar pigeon	Europe	Netherlands	FALSE	21	21	19	13	0	0	0	61	21	21	42	0.5
112	Caloenas nicobarica	Nicobar pigeon	Europe	Netherlands	FALSE	4	5	1	1	0	0	0	10	4	5	9	0.444444
113	Caloenas nicobarica	Nicobar pigeon	Europe	Netherlands	FALSE	14	11	1	4	0	0	0	26	14	11	25	0.56
114	Caloenas nicobarica	Nicobar pigeon	Europe	Netherlands	FALSE	17	14	1	9	0	0	0	32	17	14	31	0.548387
115	Caloenas nicobarica	Nicobar pigeon	Europe	Netherlands	FALSE	2	1	0	0	0	0	0	3	2	1	3	0.666667
116	Caloenas nicobarica	Nicobar pigeon	Europe	Netherlands	FALSE	2	3	0	0	0	0	0	5	2	3	5	0.4
117	Caloenas nicobarica	Nicobar pigeon	Europe	Netherlands	FALSE	2	1	0	0	0	0	0	3	2	1	3	0.666667
119	Caloenas nicobarica	Nicobar pigeon	Europe	Poland	FALSE	1	1	0	0	0	0	1	3	1	1	2	0.5
120	Caloenas nicobarica	Nicobar pigeon	Europe	Poland	FALSE	2	2	0	0	0	0	0	4	2	2	4	0.5
121	Caloenas nicobarica	Nicobar pigeon	Europe	Poland	FALSE	7	6	0	0	0	0	0	13	7	6	13	0.538462
122	Caloenas nicobarica	Nicobar pigeon	Europe	Poland	FALSE	1	1	0	0	0	0	0	2	1	1	2	0.5
123	Caloenas nicobarica	Nicobar pigeon	Europe	Poland	FALSE	3	4	2	2	0	0	0	9	3	4	7	0.428571
124	Caloenas nicobarica	Nicobar pigeon	Europe	Poland	FALSE	4	2	1	1	0	0	0	7	4	2	6	0.666667
125	Caloenas nicobarica	Nicobar pigeon	Europe	Poland	FALSE	3	2	0	0	0	0	0	5	3	2	5	0.6
126	Caloenas nicobarica	Nicobar pigeon	Europe	Portugal	FALSE	13	8	3	0	0	0	0	24	13	8	21	0.619048
127	Caloenas nicobarica	Nicobar pigeon	Europe	Portugal	FALSE	4	2	0	0	0	0	0	6	4	2	6	0.666667
128	Caloenas nicobarica	Nicobar pigeon	Europe	Russian Federation	FALSE	2	2	0	0	0	0	0	4	2	2	4	0.5
129	Caloenas nicobarica	Nicobar pigeon	Europe	Spain	FALSE	10	14	0	0	0	0	0	24	10	14	24	0.416667
130	Caloenas nicobarica	Nicobar pigeon	Europe	Spain	FALSE	4	3	1	1	0	0	0	8	4	3	7	0.571429
131	Caloenas nicobarica	Nicobar pigeon	Europe	Spain	FALSE	2	2	0	0	0	0	0	4	2	2	4	0.5
132	Caloenas nicobarica	Nicobar pigeon	Europe	Spain	FALSE	1	2	3	0	0	0	0	6	1	2	3	0.333333
133	Caloenas nicobarica	Nicobar pigeon	Europe	Spain	FALSE	1	1	0	0	0	0	0	2	1	1	2	0.5
134	Caloenas nicobarica	Nicobar pigeon	Europe	Switzerland	FALSE	0	1	0	0	0	0	0	1	0	1	1	0
135	Caloenas nicobarica	Nicobar pigeon	Europe	United Kingdom	FALSE	0	1	0	0	0	0	0	1	0	1	1	0
136	Caloenas nicobarica	Nicobar pigeon	Europe	United Kingdom	FALSE	2	2	0	0	0	0	0	4	2	2	4	0.5
137	Caloenas nicobarica	Nicobar pigeon	Europe	United Kingdom	FALSE	0	1	0	0	0	0	0	1	0	1	1	0
138	Caloenas nicobarica	Nicobar pigeon	Europe	United Kingdom	FALSE	1	0	0	0	0	0	0	1	1	0	1	1
139	Caloenas nicobarica	Nicobar pigeon	Europe	United Kingdom	FALSE	1	0	0	0	0	0	0	1	1	0	1	1
140	Caloenas nicobarica	Nicobar pigeon	Europe	United Kingdom	FALSE	4	1	0	0	0	0	0	5	4	1	5	0.8
141	Caloenas nicobarica	Nicobar pigeon	Europe	United Kingdom	FALSE	1	1	0	0	0	0	0	2	1	1	2	0.5
142	Caloenas nicobarica	Nicobar pigeon	Europe	United Kingdom	FALSE	4	0	0	0	0	0	0	4	4	0	4	1
143	Caloenas nicobarica	Nicobar pigeon	Europe	United Kingdom	FALSE	3	3	0	0	0	0	0	6	3	3	6	0.5
144	Caloenas nicobarica	Nicobar pigeon	Europe	United Kingdom	FALSE	3	2	0	0	0	0	0	5	3	2	5	0.6
145	Caloenas nicobarica	Nicobar pigeon	Europe	United Kingdom	FALSE	2	1	0	0	0	0	0	3	2	1	3	0.666667
146	Caloenas nicobarica	Nicobar pigeon	North America	Canada	FALSE	13	14	4	2	0	0	0	31	13	14	27	0.481481
147	Caloenas nicobarica	Nicobar pigeon	North America	United States	FALSE	1	0	0	0	0	0	0	1	1	0	1	1
148	Caloenas nicobarica	Nicobar pigeon	North America	United States	FALSE	0	2	0	0	0	0	0	2	0	2	2	0
149	Caloenas nicobarica	Nicobar pigeon	North America	United States	FALSE	3	0	0	0	0	0	0	3	3	0	3	1
150	Caloenas nicobarica	Nicobar pigeon	North America	United States	FALSE	2	2	0	0	0	0	0	4	2	2	4	0.5
151	Caloenas nicobarica	Nicobar pigeon	North America	United States	FALSE	1	2	0	0	0	0	0	3	1	2	3	0.333333
152	Caloenas nicobarica	Nicobar pigeon	North America	United States	FALSE	2	3	1	0	0	0	0	6	2	3	5	0.4
153	Caloenas nicobarica	Nicobar pigeon	North America	United States	FALSE	2	2	0	0	0	0	0	4	2	2	4	0.5
154	Caloenas nicobarica	Nicobar pigeon	North America	United States	FALSE	8	1	0	0	0	0	0	9	8	1	9	0.888889
155	Caloenas nicobarica	Nicobar pigeon	North America	United States	FALSE	4	1	1	0	0	0	0	6	4	1	5	0.8
156	Caloenas nicobarica	Nicobar pigeon	North America	United States	FALSE	7	3	0	0	0	0	0	10	7	3	10	0.7
157	Caloenas nicobarica	Nicobar pigeon	North America	United States	FALSE	1	0	0	0	0	0	0	1	1	0	1	1
158	Caloenas nicobarica	Nicobar pigeon	North America	United States	FALSE	4	1	0	0	0	0	0	5	4	1	5	0.8
159	Caloenas nicobarica	Nicobar pigeon	North America	United States	FALSE	1	0	0	0	0	0	0	1	1	0	1	1
160	Caloenas nicobarica	Nicobar pigeon	North America	United States	FALSE	1	3	2	0	0	0	0	6	1	3	4	0.25
161	Caloenas nicobarica	Nicobar pigeon	North America	United States	FALSE	1	2	1	0	0	0	0	4	1	2	3	0.333333
162	Caloenas nicobarica	Nicobar pigeon	North America	United States	FALSE	2	2	0	0	0	0	0	4	2	2	4	0.5
163	Caloenas nicobarica	Nicobar pigeon	North America	United States	FALSE	4	1	0	0	0	0	0	5	4	1	5	0.8
164	Caloenas nicobarica	Nicobar pigeon	North America	United States	FALSE	25	20	0	3	0	0	0	45	25	20	45	0.555556
165	Caloenas nicobarica	Nicobar pigeon	North America	United States	FALSE	1	1	0	0	0	0	0	2	1	1	2	0.5
166	Caloenas nicobarica	Nicobar pigeon	North America	United States	FALSE	1	0	0	0	0	0	0	1	1	0	1	1
167	Caloenas nicobarica	Nicobar pigeon	North America	United States	FALSE	1	1	0	0	0	0	0	2	1	1	2	0.5
168	Caloenas nicobarica	Nicobar pigeon	North America	United States	FALSE	1	2	0	0	0	0	0	3	1	2	3	0.333333
169	Caloenas nicobarica	Nicobar pigeon	North America	United States	FALSE	5	0	0	0	0	0	0	5	5	0	5	1
170	Caloenas nicobarica	Nicobar pigeon	North America	United States	FALSE	1	3	0	0	0	0	0	4	1	3	4	0.25
171	Caloenas nicobarica	Nicobar pigeon	North America	United States	FALSE	14	9	0	0	0	0	0	23	14	9	23	0.608696
172	Caloenas nicobarica	Nicobar pigeon	North America	United States	FALSE	0	1	0	0	0	0	0	1	0	1	1	0
174	Caloenas nicobarica	Nicobar pigeon	North America	United States	FALSE	2	0	0	0	0	0	0	2	2	0	2	1
175	Caloenas nicobarica	Nicobar pigeon	North America	United States	FALSE	1	1	0	0	0	0	0	2	1	1	2	0.5
176	Caloenas nicobarica	Nicobar pigeon	North America	United States	FALSE	0	1	0	0	0	0	0	1	0	1	1	0
177	Caloenas nicobarica	Nicobar pigeon	North America	United States	FALSE	2	2	0	0	0	0	0	4	2	2	4	0.5
178	Caloenas nicobarica	Nicobar pigeon	North America	United States	FALSE	1	0	0	0	0	0	0	1	1	0	1	1
179	Caloenas nicobarica	Nicobar pigeon	North America	United States	FALSE	2	1	0	0	0	0	0	3	2	1	3	0.666667
180	Caloenas nicobarica	Nicobar pigeon	North America	United States	FALSE	4	0	0	0	0	0	0	4	4	0	4	1
181	Caloenas nicobarica	Nicobar pigeon	North America	United States	FALSE	18	18	0	6	0	0	0	36	18	18	36	0.5
182	Caloenas nicobarica	Nicobar pigeon	North America	United States	FALSE	1	2	0	0	0	0	0	3	1	2	3	0.333333
183	Caloenas nicobarica	Nicobar pigeon	North America	United States	FALSE	4	2	0	0	0	0	0	6	4	2	6	0.666667
184	Caloenas nicobarica	Nicobar pigeon	North America	United States	FALSE	7	3	0	0	0	0	0	10	7	3	10	0.7
185	Caloenas nicobarica	Nicobar pigeon	North America	United States	FALSE	0	8	0	0	0	0	0	8	0	8	8	0
186	Caloenas nicobarica	Nicobar pigeon	North America	United States	FALSE	8	1	0	0	0	0	0	9	8	1	9	0.888889
188	Caloenas nicobarica	Nicobar pigeon	North America	United States	FALSE	5	4	0	1	0	0	0	9	5	4	9	0.555556
189	Caloenas nicobarica	Nicobar pigeon	North America	United States	FALSE	2	0	0	0	0	0	0	2	2	0	2	1
190	Caloenas nicobarica	Nicobar pigeon	North America	United States	FALSE	28	27	5	1	0	0	8	68	28	27	55	0.509091
191	Caloenas nicobarica	Nicobar pigeon	North America	United States	FALSE	1	1	0	0	0	0	0	2	1	1	2	0.5
192	Caloenas nicobarica	Nicobar pigeon	North America	United States	FALSE	1	0	0	0	0	0	0	1	1	0	1	1
193	Caloenas nicobarica	Nicobar pigeon	North America	United States	FALSE	0	1	0	0	0	0	0	1	0	1	1	0
194	Caloenas nicobarica	Nicobar pigeon	North America	United States	FALSE	10	5	5	2	0	0	0	20	10	5	15	0.666667
195	Caloenas nicobarica	Nicobar pigeon	North America	United States	FALSE	7	5	0	0	0	0	0	12	7	5	12	0.583333
196	Caloenas nicobarica	Nicobar pigeon	North America	United States	FALSE	21	6	1	1	0	0	0	28	21	6	27	0.777778
197	Caloenas nicobarica	Nicobar pigeon	North America	United States	FALSE	6	9	0	2	0	0	0	15	6	9	15	0.4
198	Caloenas nicobarica	Nicobar pigeon	North America	United States	FALSE	6	4	0	0	0	0	0	10	6	4	10	0.6
199	Caloenas nicobarica	Nicobar pigeon	North America	United States	FALSE	8	10	0	0	0	0	0	18	8	10	18	0.444444
200	Caloenas nicobarica	Nicobar pigeon	North America	United States	FALSE	1	0	0	0	0	0	0	1	1	0	1	1
201	Caloenas nicobarica	Nicobar pigeon	North America	United States	FALSE	1	1	0	0	0	0	2	4	1	1	2	0.5
202	Caloenas nicobarica	Nicobar pigeon	North America	United States	FALSE	2	0	0	0	0	0	0	2	2	0	2	1
203	Caloenas nicobarica	Nicobar pigeon	North America	United States	FALSE	8	14	0	3	0	0	0	22	8	14	22	0.363636
204	Caloenas nicobarica	Nicobar pigeon	North America	United States	FALSE	1	3	0	0	0	0	0	4	1	3	4	0.25
205	Caloenas nicobarica	Nicobar pigeon	North America	United States	FALSE	0	4	0	0	0	0	0	4	0	4	4	0
206	Caloenas nicobarica	Nicobar pigeon	North America	United States	FALSE	3	0	0	0	0	0	0	3	3	0	3	1
208	Caloenas nicobarica	Nicobar pigeon	South America	Argentina	FALSE	17	1	15	4	0	0	0	33	17	1	18	0.944444
210	Caloenas nicobarica nicobarica	Nicobar pigeon	Europe	Czech Republic	FALSE	1	2	2	0	0	0	0	5	1	2	3	0.333333
211	Caloenas nicobarica nicobarica	Nicobar pigeon	Europe	France	FALSE	8	9	1	0	0	0	0	18	8	9	17	0.470588
212	Caloenas nicobarica nicobarica	Nicobar pigeon	Europe	France	FALSE	30	24	21	3	0	0	0	75	30	24	54	0.555556
213	Caloenas nicobarica nicobarica	Nicobar pigeon	Europe	France	FALSE	4	2	3	0	0	0	0	9	4	2	6	0.666667
214	Caloenas nicobarica nicobarica	Nicobar pigeon	Europe	France	FALSE	2	2	0	0	0	0	0	4	2	2	4	0.5
215	Caloenas nicobarica nicobarica	Nicobar pigeon	Europe	France	FALSE	1	0	0	0	0	0	0	1	1	0	1	1
216	Caloenas nicobarica nicobarica	Nicobar pigeon	Europe	France	FALSE	1	2	0	0	0	0	0	3	1	2	3	0.333333
217	Caloenas nicobarica nicobarica	Nicobar pigeon	Europe	Germany	FALSE	1	0	0	0	0	0	0	1	1	0	1	1
218	Caloenas nicobarica nicobarica	Nicobar pigeon	Europe	Germany	FALSE	1	1	0	0	0	0	0	2	1	1	2	0.5
220	Caloenas nicobarica nicobarica	Nicobar pigeon	Europe	Jersey	FALSE	8	6	0	0	0	0	0	14	8	6	14	0.571429
221	Caloenas nicobarica nicobarica	Nicobar pigeon	Europe	Netherlands	FALSE	1	0	0	0	0	0	0	1	1	0	1	1
222	Caloenas nicobarica nicobarica	Nicobar pigeon	Europe	Netherlands	FALSE	0	4	0	0	0	0	0	4	0	4	4	0
223	Caloenas nicobarica nicobarica	Nicobar pigeon	Europe	Portugal	FALSE	34	11	23	8	0	0	0	68	34	11	45	0.755556
224	Caloenas nicobarica nicobarica	Nicobar pigeon	Europe	Portugal	FALSE	1	1	0	0	0	0	0	2	1	1	2	0.5
225	Caloenas nicobarica nicobarica	Nicobar pigeon	Europe	Spain	FALSE	2	2	0	0	0	0	0	4	2	2	4	0.5
226	Caloenas nicobarica nicobarica	Nicobar pigeon	Europe	Spain	FALSE	1	1	0	0	0	0	0	2	1	1	2	0.5
227	Caloenas nicobarica nicobarica	Nicobar pigeon	Europe	Spain	FALSE	3	6	0	0	0	0	0	9	3	6	9	0.333333
228	Caloenas nicobarica nicobarica	Nicobar pigeon	Europe	Spain	FALSE	2	2	2	1	0	0	0	6	2	2	4	0.5
229	Caloenas nicobarica nicobarica	Nicobar pigeon	Europe	Switzerland	FALSE	6	15	1	4	0	0	0	22	6	15	21	0.285714
230	Caloenas nicobarica nicobarica	Nicobar pigeon	Europe	United Kingdom	FALSE	4	1	0	0	0	0	0	5	4	1	5	0.8
231	Caloenas nicobarica nicobarica	Nicobar pigeon	Europe	United Kingdom	FALSE	3	1	0	0	0	0	0	4	3	1	4	0.75
232	Caloenas nicobarica nicobarica	Nicobar pigeon	Europe	United Kingdom	FALSE	2	0	0	0	0	0	0	2	2	0	2	1
233	Caloenas nicobarica nicobarica	Nicobar pigeon	Europe	United Kingdom	FALSE	6	9	4	0	0	0	0	19	6	9	15	0.4
234	Caloenas nicobarica nicobarica	Nicobar pigeon	Europe	United Kingdom	FALSE	1	2	0	0	0	0	0	3	1	2	3	0.333333
235	Caloenas nicobarica nicobarica	Nicobar pigeon	Europe	United Kingdom	FALSE	2	2	2	1	0	0	0	6	2	2	4	0.5
236	Caloenas nicobarica nicobarica	Nicobar pigeon	North America	United States	FALSE	1	1	0	0	0	0	0	2	1	1	2	0.5
237	Caloenas nicobarica nicobarica	Nicobar pigeon	North America	United States	FALSE	3	5	0	0	0	0	0	8	3	5	8	0.375
238	Caloenas nicobarica nicobarica	Nicobar pigeon	North America	United States	FALSE	0	1	0	0	0	0	0	1	0	1	1	0
239	Caloenas nicobarica nicobarica	Nicobar pigeon	North America	United States	FALSE	0	1	0	0	0	0	0	1	0	1	1	0
240	Caloenas nicobarica nicobarica	Nicobar pigeon	North America	United States	FALSE	1	0	0	0	0	0	0	1	1	0	1	1
241	Caloenas nicobarica nicobarica	Nicobar pigeon	North America	United States	FALSE	1	0	0	0	0	0	0	1	1	0	1	1
242	Caloenas nicobarica nicobarica	Nicobar pigeon	North America	United States	FALSE	1	2	0	0	0	0	0	3	1	2	3	0.333333
243	Chalcophaps indica	Grey-capped emerald dove	Africa	South Africa	FALSE	0	0	0	0	1	1	0	2	1	1	2	0.5
244	Chalcophaps indica	Grey-capped emerald dove	Africa	South Africa	FALSE	0	1	0	0	0	0	0	1	0	1	1	0
245	Chalcophaps indica	Grey-capped emerald dove	Asia	Hong Kong	TRUE	1	3	12	0	0	0	0	16	1	3	4	0.25
247	Chalcophaps indica	Grey-capped emerald dove	Asia	Singapore	TRUE	1	0	5	0	0	0	0	6	1	0	1	1
248	Chalcophaps indica	Grey-capped emerald dove	Asia	Taiwan	TRUE	2	1	0	0	0	0	0	3	2	1	3	0.666667
252	Chalcophaps indica	Grey-capped emerald dove	Australia (Oceania)	New Caledonia	FALSE	0	0	1	0	2	1	17	21	2	1	3	0.666667
253	Chalcophaps indica	Grey-capped emerald dove	Europe	Austria	FALSE	1	1	0	0	0	0	0	2	1	1	2	0.5
254	Chalcophaps indica	Grey-capped emerald dove	Europe	Belgium	FALSE	1	0	0	0	0	0	0	1	1	0	1	1
255	Chalcophaps indica	Grey-capped emerald dove	Europe	Belgium	FALSE	7	0	0	0	0	0	0	7	7	0	7	1
256	Chalcophaps indica	Grey-capped emerald dove	Europe	Belgium	FALSE	1	1	0	0	0	0	0	2	1	1	2	0.5
257	Chalcophaps indica	Grey-capped emerald dove	Europe	Czech Republic	FALSE	4	3	0	0	0	0	0	7	4	3	7	0.571429
258	Chalcophaps indica	Grey-capped emerald dove	Europe	Czech Republic	FALSE	0	1	0	0	0	0	0	1	0	1	1	0
259	Chalcophaps indica	Grey-capped emerald dove	Europe	Denmark	FALSE	1	0	0	0	0	0	0	1	1	0	1	1
260	Chalcophaps indica	Grey-capped emerald dove	Europe	Denmark	FALSE	3	3	0	0	1	3	0	10	4	6	10	0.4
262	Chalcophaps indica	Grey-capped emerald dove	Europe	France	FALSE	1	5	3	0	0	0	0	9	1	5	6	0.166667
263	Chalcophaps indica	Grey-capped emerald dove	Europe	France	FALSE	3	2	0	0	0	0	0	5	3	2	5	0.6
264	Chalcophaps indica	Grey-capped emerald dove	Europe	France	FALSE	1	1	8	6	0	0	0	10	1	1	2	0.5
265	Chalcophaps indica	Grey-capped emerald dove	Europe	France	FALSE	1	0	0	0	0	0	0	1	1	0	1	1
266	Chalcophaps indica	Grey-capped emerald dove	Europe	France	FALSE	1	0	0	0	0	0	0	1	1	0	1	1
267	Chalcophaps indica	Grey-capped emerald dove	Europe	France	FALSE	3	1	0	0	0	0	0	4	3	1	4	0.75
268	Chalcophaps indica	Grey-capped emerald dove	Europe	Germany	FALSE	1	1	0	0	0	0	0	2	1	1	2	0.5
269	Chalcophaps indica	Grey-capped emerald dove	Europe	Germany	FALSE	2	2	0	0	0	0	0	4	2	2	4	0.5
270	Chalcophaps indica	Grey-capped emerald dove	Europe	Germany	FALSE	1	1	0	0	0	0	0	2	1	1	2	0.5
271	Chalcophaps indica	Grey-capped emerald dove	Europe	Germany	FALSE	0	0	0	0	1	2	0	3	1	2	3	0.333333
272	Chalcophaps indica	Grey-capped emerald dove	Europe	Germany	FALSE	1	1	0	0	0	0	0	2	1	1	2	0.5
273	Chalcophaps indica	Grey-capped emerald dove	Europe	Germany	FALSE	1	0	0	0	0	0	0	1	1	0	1	1
274	Chalcophaps indica	Grey-capped emerald dove	Europe	Germany	FALSE	12	13	6	0	0	0	0	31	12	13	25	0.48
275	Chalcophaps indica	Grey-capped emerald dove	Europe	Greece	FALSE	3	2	10	0	0	0	0	15	3	2	5	0.6
276	Chalcophaps indica	Grey-capped emerald dove	Europe	Hungary	FALSE	0	1	1	0	0	0	0	2	0	1	1	0
277	Chalcophaps indica	Grey-capped emerald dove	Europe	Italy	FALSE	1	2	0	0	0	0	0	3	1	2	3	0.333333
278	Chalcophaps indica	Grey-capped emerald dove	Europe	Jersey	FALSE	5	12	0	0	0	0	0	17	5	12	17	0.294118
279	Chalcophaps indica	Grey-capped emerald dove	Europe	Netherlands	FALSE	7	5	30	7	0	0	0	42	7	5	12	0.583333
281	Chalcophaps indica	Grey-capped emerald dove	Europe	Netherlands	FALSE	15	1	1	0	0	0	0	17	15	1	16	0.9375
282	Chalcophaps indica	Grey-capped emerald dove	Europe	Netherlands	FALSE	7	3	0	0	0	0	0	10	7	3	10	0.7
285	Chalcophaps indica	Grey-capped emerald dove	Europe	Poland	FALSE	1	1	0	0	0	1	0	3	1	2	3	0.333333
286	Chalcophaps indica	Grey-capped emerald dove	Europe	Poland	FALSE	2	0	0	0	2	0	0	4	4	0	4	1
287	Chalcophaps indica	Grey-capped emerald dove	Europe	Poland	FALSE	0	0	0	0	2	2	0	4	2	2	4	0.5
288	Chalcophaps indica	Grey-capped emerald dove	Europe	Poland	FALSE	3	4	2	1	0	0	0	9	3	4	7	0.428571
289	Chalcophaps indica	Grey-capped emerald dove	Europe	Portugal	FALSE	1	4	0	0	0	0	0	5	1	4	5	0.2
291	Chalcophaps indica	Grey-capped emerald dove	Europe	Spain	FALSE	2	2	0	0	0	0	0	4	2	2	4	0.5
292	Chalcophaps indica	Grey-capped emerald dove	Europe	Spain	FALSE	6	5	0	0	0	0	0	11	6	5	11	0.545455
293	Chalcophaps indica	Grey-capped emerald dove	Europe	United Kingdom	FALSE	1	2	3	2	0	0	0	6	1	2	3	0.333333
294	Chalcophaps indica	Grey-capped emerald dove	Europe	United Kingdom	FALSE	1	1	2	1	0	0	0	4	1	1	2	0.5
295	Chalcophaps indica	Grey-capped emerald dove	Europe	United Kingdom	FALSE	2	0	0	0	0	0	0	2	2	0	2	1
296	Chalcophaps indica	Grey-capped emerald dove	Europe	United Kingdom	FALSE	3	2	0	0	0	0	0	5	3	2	5	0.6
297	Chalcophaps indica	Grey-capped emerald dove	Europe	United Kingdom	FALSE	6	4	3	3	0	0	0	13	6	4	10	0.6
298	Chalcophaps indica	Grey-capped emerald dove	Europe	United Kingdom	FALSE	1	2	0	0	0	0	0	3	1	2	3	0.333333
299	Chalcophaps indica	Grey-capped emerald dove	Europe	United Kingdom	FALSE	3	2	0	0	0	0	0	5	3	2	5	0.6
300	Chalcophaps indica	Grey-capped emerald dove	Europe	United Kingdom	FALSE	1	1	0	0	0	0	0	2	1	1	2	0.5
301	Chalcophaps indica	Grey-capped emerald dove	Europe	United Kingdom	FALSE	13	4	4	0	0	0	10	31	13	4	17	0.764706
302	Chalcophaps indica	Grey-capped emerald dove	Europe	United Kingdom	FALSE	4	2	0	0	0	0	0	6	4	2	6	0.666667
303	Chalcophaps indica	Grey-capped emerald dove	Europe	United Kingdom	FALSE	1	0	0	0	0	0	0	1	1	0	1	1
304	Chalcophaps indica	Grey-capped emerald dove	Europe	United Kingdom	FALSE	1	2	0	0	0	0	0	3	1	2	3	0.333333
305	Chalcophaps indica	Grey-capped emerald dove	Europe	United Kingdom	FALSE	2	0	0	0	0	0	0	2	2	0	2	1
306	Chalcophaps indica	Grey-capped emerald dove	Europe	United Kingdom	FALSE	3	4	2	3	0	0	0	9	3	4	7	0.428571
307	Chalcophaps indica	Grey-capped emerald dove	Europe	United Kingdom	FALSE	1	0	0	0	0	0	0	1	1	0	1	1
308	Chalcophaps indica	Grey-capped emerald dove	North America	Canada	FALSE	0	2	0	0	0	0	0	2	0	2	2	0
309	Chalcophaps indica	Grey-capped emerald dove	North America	United States	FALSE	3	3	0	0	0	0	0	6	3	3	6	0.5
310	Chalcophaps indica	Grey-capped emerald dove	North America	United States	FALSE	1	1	0	0	0	0	0	2	1	1	2	0.5
311	Chalcophaps indica	Grey-capped emerald dove	North America	United States	FALSE	0	1	0	0	0	0	0	1	0	1	1	0
312	Chalcophaps indica	Grey-capped emerald dove	North America	United States	FALSE	1	0	0	0	0	0	0	1	1	0	1	1
313	Chalcophaps indica	Grey-capped emerald dove	North America	United States	FALSE	2	1	0	0	0	0	0	3	2	1	3	0.666667
314	Chalcophaps indica	Grey-capped emerald dove	North America	United States	FALSE	5	0	0	0	0	0	0	5	5	0	5	1
315	Chalcophaps indica	Grey-capped emerald dove	North America	United States	FALSE	23	17	0	4	0	0	0	40	23	17	40	0.575
316	Chalcophaps indica	Grey-capped emerald dove	North America	United States	FALSE	1	0	0	0	0	0	0	1	1	0	1	1
317	Chalcophaps indica	Grey-capped emerald dove	North America	United States	FALSE	0	1	0	0	0	0	0	1	0	1	1	0
318	Chalcophaps indica	Grey-capped emerald dove	North America	United States	FALSE	0	8	0	0	0	0	0	8	0	8	8	0
319	Chalcophaps indica	Grey-capped emerald dove	North America	United States	FALSE	4	0	0	0	0	0	0	4	4	0	4	1
320	Chalcophaps indica	Grey-capped emerald dove	North America	United States	FALSE	1	1	0	0	0	0	0	2	1	1	2	0.5
321	Chalcophaps indica	Grey-capped emerald dove	North America	United States	FALSE	3	6	0	0	0	0	0	9	3	6	9	0.333333
322	Chalcophaps indica	Grey-capped emerald dove	North America	United States	FALSE	2	0	0	0	0	0	0	2	2	0	2	1
323	Chalcophaps indica	Grey-capped emerald dove	North America	United States	FALSE	1	1	0	0	0	0	0	2	1	1	2	0.5
324	Chalcophaps indica	Grey-capped emerald dove	North America	United States	FALSE	3	1	0	0	0	0	0	4	3	1	4	0.75
325	Chalcophaps indica	Grey-capped emerald dove	North America	United States	FALSE	6	0	0	0	0	0	0	6	6	0	6	1
326	Chalcophaps indica	Grey-capped emerald dove	North America	United States	FALSE	7	0	0	0	0	0	0	7	7	0	7	1
327	Chalcophaps indica	Grey-capped emerald dove	North America	United States	FALSE	2	0	0	0	0	0	0	2	2	0	2	1
328	Chalcophaps indica	Grey-capped emerald dove	North America	United States	FALSE	3	1	0	0	0	0	0	4	3	1	4	0.75
329	Chalcophaps indica	Grey-capped emerald dove	North America	United States	FALSE	0	5	0	0	0	0	0	5	0	5	5	0
330	Chalcophaps indica	Grey-capped emerald dove	North America	United States	FALSE	1	0	0	0	0	0	0	1	1	0	1	1
331	Chalcophaps indica	Grey-capped emerald dove	North America	United States	FALSE	1	1	0	0	0	0	0	2	1	1	2	0.5
332	Chalcophaps indica	Grey-capped emerald dove	North America	United States	FALSE	1	0	0	0	0	0	0	1	1	0	1	1
333	Chalcophaps indica	Grey-capped emerald dove	North America	United States	FALSE	4	3	3	1	0	0	0	10	4	3	7	0.571429
334	Chalcophaps indica	Grey-capped emerald dove	North America	United States	FALSE	8	4	1	0	0	0	0	13	8	4	12	0.666667
335	Chalcophaps indica	Grey-capped emerald dove	North America	United States	FALSE	2	2	0	0	0	0	0	4	2	2	4	0.5
336	Chalcophaps indica	Grey-capped emerald dove	North America	United States	FALSE	1	2	0	0	0	0	0	3	1	2	3	0.333333
338	Chalcophaps indica indica	Emerald dove	Asia	Israel	FALSE	1	1	3	2	0	0	0	5	1	1	2	0.5
340	Chalcophaps indica indica	Emerald dove	Asia	Singapore	TRUE	2	2	0	0	0	0	0	4	2	2	4	0.5
341	Chalcophaps indica indica	Emerald dove	Australia (Oceania)	Australia	TRUE	1	4	1	0	0	0	0	6	1	4	5	0.2
344	Chalcophaps indica indica	Emerald dove	Europe	Czech Republic	FALSE	1	2	0	0	0	0	0	3	1	2	3	0.333333
345	Chalcophaps indica indica	Emerald dove	Europe	Czech Republic	FALSE	2	0	0	0	0	0	0	2	2	0	2	1
346	Chalcophaps indica indica	Emerald dove	Europe	Czech Republic	FALSE	2	5	5	5	0	0	0	12	2	5	7	0.285714
347	Chalcophaps indica indica	Emerald dove	Europe	Czech Republic	FALSE	3	2	0	0	0	0	0	5	3	2	5	0.6
348	Chalcophaps indica indica	Emerald dove	Europe	Netherlands	FALSE	1	1	0	0	0	0	0	2	1	1	2	0.5
349	Chalcophaps indica indica	Emerald dove	Europe	Poland	FALSE	1	1	0	0	0	0	0	2	1	1	2	0.5
350	Chalcophaps indica indica	Emerald dove	Europe	Poland	FALSE	0	2	0	0	0	0	0	2	0	2	2	0
351	Chalcophaps indica indica	Emerald dove	North America	Canada	FALSE	1	0	0	0	0	0	0	1	1	0	1	1
352	Chalcophaps indica indica	Emerald dove	North America	United States	FALSE	1	3	0	0	0	0	0	4	1	3	4	0.25
356	Chalcophaps stephani	Brown-backed ground pigeon	Europe	France	FALSE	0	1	0	0	0	0	0	1	0	1	1	0
358	Chalcophaps longirostris longirostris	Brown-capped emerald dove	Australia (Oceania)	Australia	TRUE	13	11	15	5	0	0	0	39	13	11	24	0.541667
359	Chalcophaps longirostris longirostris	Brown-capped emerald dove	Australia (Oceania)	Australia	TRUE	1	1	1	0	0	0	0	3	1	1	2	0.5
360	Chalcophaps longirostris longirostris	Brown-capped emerald dove	Australia (Oceania)	Australia	TRUE	4	2	1	0	0	0	0	7	4	2	6	0.666667
361	Chalcophaps longirostris longirostris	Brown-capped emerald dove	Australia (Oceania)	Australia	TRUE	1	1	7	0	0	0	0	9	1	1	2	0.5
362	Chalcophaps longirostris longirostris	Brown-capped emerald dove	Australia (Oceania)	Australia	TRUE	1	1	0	0	0	0	0	2	1	1	2	0.5
363	Chalcophaps longirostris rogersi	Brown-capped emerald dove	Asia	Singapore	TRUE	0	1	0	0	0	0	0	1	0	1	1	0
364	Chalcophaps longirostris rogersi	Brown-capped emerald dove	Australia (Oceania)	Australia	TRUE	3	0	0	0	0	0	0	3	3	0	3	1
365	Chalcophaps longirostris rogersi	Brown-capped emerald dove	Australia (Oceania)	Australia	TRUE	4	27	0	0	0	0	0	31	4	27	31	0.129032
366	Chalcophaps longirostris rogersi	Brown-capped emerald dove	Australia (Oceania)	Australia	TRUE	2	3	0	0	0	0	0	5	2	3	5	0.4
367	Chalcophaps longirostris rogersi	Brown-capped emerald dove	Australia (Oceania)	Australia	FALSE	0	2	0	0	0	0	0	2	0	2	2	0
369	Chalcophaps longirostris rogersi	Brown-capped emerald dove	Australia (Oceania)	Australia	TRUE	4	2	0	0	0	0	0	6	4	2	6	0.666667
370	Chalcophaps longirostris rogersi	Brown-capped emerald dove	Australia (Oceania)	Australia	TRUE	0	1	14	0	0	0	0	15	0	1	1	0
371	Chalcophaps longirostris rogersi	Brown-capped emerald dove	Australia (Oceania)	New Zealand	FALSE	2	0	0	0	0	0	0	2	2	0	2	1
372	Claravis pretiosa	Blue ground pigeon	Asia	Singapore	FALSE	14	17	6	7	0	0	0	37	14	17	31	0.451613
373	Claravis pretiosa	Blue ground pigeon	Europe	Belgium	FALSE	1	2	0	0	0	0	0	3	1	2	3	0.333333
374	Claravis pretiosa	Blue ground pigeon	Europe	France	FALSE	1	0	0	0	0	0	0	1	1	0	1	1
375	Claravis pretiosa	Blue ground pigeon	Europe	Germany	FALSE	0	0	0	0	1	1	0	2	1	1	2	0.5
376	Claravis pretiosa	Blue ground pigeon	Europe	Germany	FALSE	1	1	1	1	0	0	0	3	1	1	2	0.5
377	Claravis pretiosa	Blue ground pigeon	Europe	Germany	FALSE	0	0	0	0	0	1	5	6	0	1	1	0
378	Claravis pretiosa	Blue ground pigeon	Europe	Germany	FALSE	0	0	0	0	2	2	0	4	2	2	4	0.5
380	Claravis pretiosa	Blue ground pigeon	Europe	Netherlands	FALSE	1	1	0	0	0	0	0	2	1	1	2	0.5
381	Claravis pretiosa	Blue ground pigeon	Europe	Netherlands	FALSE	9	6	10	12	0	0	0	25	9	6	15	0.6
382	Claravis pretiosa	Blue ground pigeon	North America	United States	FALSE	0	1	0	0	0	0	0	1	0	1	1	0
383	Claravis pretiosa	Blue ground pigeon	North America	United States	FALSE	1	0	0	0	0	0	0	1	1	0	1	1
384	Claravis pretiosa	Blue ground pigeon	North America	United States	FALSE	2	1	0	0	0	0	0	3	2	1	3	0.666667
385	Claravis pretiosa	Blue ground pigeon	North America	United States	FALSE	5	7	0	0	0	0	0	12	5	7	12	0.416667
396	Columba arquatrix	Olive pigeon	Africa	South Africa	TRUE	1	1	2	0	0	0	0	4	1	1	2	0.5
398	Columba arquatrix	Olive pigeon	Asia	Israel	FALSE	1	1	1	0	0	0	0	3	1	1	2	0.5
399	Columba arquatrix	Olive pigeon	Asia	Singapore	FALSE	2	2	0	0	0	0	0	4	2	2	4	0.5
400	Columba arquatrix	Olive pigeon	Asia	United Arab Emirates	FALSE	1	2	0	0	0	0	0	3	1	2	3	0.333333
401	Columba arquatrix	Olive pigeon	Europe	Czech Republic	FALSE	1	2	0	0	0	0	0	3	1	2	3	0.333333
402	Columba arquatrix	Olive pigeon	Europe	France	FALSE	3	0	0	0	0	0	0	3	3	0	3	1
403	Columba arquatrix	Olive pigeon	Europe	France	FALSE	1	1	0	0	0	0	0	2	1	1	2	0.5
404	Columba arquatrix	Olive pigeon	Europe	Germany	FALSE	1	0	0	0	0	0	0	1	1	0	1	1
405	Columba arquatrix	Olive pigeon	Europe	Germany	FALSE	1	3	0	0	0	0	0	4	1	3	4	0.25
406	Columba arquatrix	Olive pigeon	Europe	Germany	FALSE	0	2	0	0	0	0	0	2	0	2	2	0
407	Columba arquatrix	Olive pigeon	Europe	Germany	FALSE	0	1	0	0	0	0	0	1	0	1	1	0
409	Columba arquatrix	Olive pigeon	North America	United States	FALSE	3	2	0	0	0	0	0	5	3	2	5	0.6
410	Columba arquatrix	Olive pigeon	North America	United States	FALSE	10	5	1	1	0	0	0	16	10	5	15	0.666667
412	Columba delegorguei	Bronze-naped pigeon	North America	United States	FALSE	0	1	0	0	0	0	0	1	0	1	1	0
416	Columba guinea	Speckled pigeon	Africa	South Africa	TRUE	1	1	3	0	0	0	0	5	1	1	2	0.5
420	Columba guinea	Speckled pigeon	Asia	Hong Kong	FALSE	5	3	0	0	0	0	0	8	5	3	8	0.625
421	Columba guinea	Speckled pigeon	Asia	Israel	FALSE	1	1	0	0	0	0	0	2	1	1	2	0.5
424	Columba guinea	Speckled pigeon	Asia	Singapore	FALSE	8	6	15	3	0	0	0	29	8	6	14	0.571429
426	Columba guinea	Speckled pigeon	Asia	United Arab Emirates	FALSE	1	4	0	0	0	0	0	5	1	4	5	0.2
427	Columba guinea	Speckled pigeon	Europe	Belgium	FALSE	12	0	0	0	0	0	0	12	12	0	12	1
429	Columba guinea	Speckled pigeon	Europe	Belgium	FALSE	5	10	0	0	0	0	0	15	5	10	15	0.333333
430	Columba guinea	Speckled pigeon	Europe	Czech Republic	FALSE	12	9	9	11	0	0	0	30	12	9	21	0.571429
431	Columba guinea	Speckled pigeon	Europe	Denmark	FALSE	2	2	0	0	0	0	0	4	2	2	4	0.5
432	Columba guinea	Speckled pigeon	Europe	France	FALSE	2	1	0	0	0	0	0	3	2	1	3	0.666667
433	Columba guinea	Speckled pigeon	Europe	France	FALSE	6	1	22	14	0	0	0	29	6	1	7	0.857143
434	Columba guinea	Speckled pigeon	Europe	France	FALSE	14	13	9	13	0	0	0	36	14	13	27	0.518519
435	Columba guinea	Speckled pigeon	Europe	France	FALSE	1	0	14	5	0	0	0	15	1	0	1	1
437	Columba guinea	Speckled pigeon	Europe	Germany	FALSE	1	1	0	0	0	0	0	2	1	1	2	0.5
439	Columba guinea	Speckled pigeon	Europe	Hungary	FALSE	1	0	0	0	0	0	0	1	1	0	1	1
440	Columba guinea	Speckled pigeon	Europe	Netherlands	FALSE	1	1	4	0	0	0	0	6	1	1	2	0.5
441	Columba guinea	Speckled pigeon	Europe	Netherlands	FALSE	0	1	0	0	0	0	0	1	0	1	1	0
443	Columba guinea	Speckled pigeon	Europe	Poland	FALSE	0	1	1	0	0	0	0	2	0	1	1	0
444	Columba guinea	Speckled pigeon	Europe	Poland	FALSE	0	1	1	0	0	0	0	2	0	1	1	0
445	Columba guinea	Speckled pigeon	Europe	Poland	FALSE	0	1	0	0	0	0	1	2	0	1	1	0
446	Columba guinea	Speckled pigeon	Europe	Portugal	FALSE	2	3	0	0	0	0	0	5	2	3	5	0.4
448	Columba guinea	Speckled pigeon	Europe	Portugal	FALSE	0	2	0	0	0	0	0	2	0	2	2	0
449	Columba guinea	Speckled pigeon	Europe	Russian Federation	FALSE	2	1	0	0	0	0	0	3	2	1	3	0.666667
450	Columba guinea	Speckled pigeon	Europe	Russian Federation	FALSE	1	1	0	0	0	0	0	2	1	1	2	0.5
451	Columba guinea	Speckled pigeon	Europe	Russian Federation	FALSE	1	1	0	0	0	0	0	2	1	1	2	0.5
452	Columba guinea	Speckled pigeon	Europe	Slovakia	FALSE	4	6	2	3	0	0	0	12	4	6	10	0.4
453	Columba guinea	Speckled pigeon	Europe	Spain	FALSE	2	2	1	1	0	0	0	5	2	2	4	0.5
454	Columba guinea	Speckled pigeon	Europe	Spain	FALSE	8	8	0	0	0	0	0	16	8	8	16	0.5
455	Columba guinea	Speckled pigeon	Europe	United Kingdom	FALSE	2	0	6	3	0	0	0	8	2	0	2	1
456	Columba guinea	Speckled pigeon	Europe	United Kingdom	FALSE	1	3	0	0	0	0	0	4	1	3	4	0.25
457	Columba guinea	Speckled pigeon	Europe	United Kingdom	FALSE	1	2	7	3	0	0	0	10	1	2	3	0.333333
458	Columba guinea	Speckled pigeon	Europe	United Kingdom	FALSE	1	1	4	2	0	0	0	6	1	1	2	0.5
462	Columba guinea	Speckled pigeon	Europe	United Kingdom	FALSE	0	0	5	1	1	0	1	7	1	0	1	1
463	Columba guinea	Speckled pigeon	Europe	United Kingdom	FALSE	1	0	0	0	0	0	0	1	1	0	1	1
464	Columba guinea	Speckled pigeon	Europe	United Kingdom	FALSE	2	0	0	0	0	0	0	2	2	0	2	1
465	Columba guinea	Speckled pigeon	Europe	United Kingdom	FALSE	3	0	0	0	0	0	0	3	3	0	3	1
466	Columba guinea	Speckled pigeon	Europe	United Kingdom	FALSE	0	1	13	0	0	0	0	14	0	1	1	0
467	Columba guinea	Speckled pigeon	Europe	United Kingdom	FALSE	2	0	0	0	0	0	0	2	2	0	2	1
471	Columba guinea	Speckled pigeon	North America	Mexico	FALSE	0	2	9	0	0	0	0	11	0	2	2	0
473	Columba guinea	Speckled pigeon	North America	United States	FALSE	0	1	0	0	0	0	0	1	0	1	1	0
474	Columba guinea	Speckled pigeon	North America	United States	FALSE	0	4	0	0	0	0	0	4	0	4	4	0
475	Columba guinea	Speckled pigeon	North America	United States	FALSE	2	0	0	0	0	0	0	2	2	0	2	1
477	Columba guinea	Speckled pigeon	North America	United States	FALSE	0	1	0	0	0	0	0	1	0	1	1	0
478	Columba guinea	Speckled pigeon	North America	United States	FALSE	1	6	3	0	0	0	0	10	1	6	7	0.142857
479	Columba guinea	Speckled pigeon	North America	United States	FALSE	3	0	0	0	0	0	0	3	3	0	3	1
480	Columba guinea	Speckled pigeon	North America	United States	FALSE	2	1	0	0	0	0	0	3	2	1	3	0.666667
481	Columba guinea	Speckled pigeon	North America	United States	FALSE	0	2	0	0	0	0	0	2	0	2	2	0
483	Columba guinea	Speckled pigeon	North America	United States	FALSE	6	0	0	0	0	0	0	6	6	0	6	1
484	Columba guinea	Speckled pigeon	North America	United States	FALSE	0	1	0	0	0	0	0	1	0	1	1	0
485	Columba guinea	Speckled pigeon	North America	United States	FALSE	3	2	2	0	0	0	0	7	3	2	5	0.6
486	Columba guinea	Speckled pigeon	North America	United States	FALSE	1	0	0	0	0	0	0	1	1	0	1	1
487	Columba guinea	Speckled pigeon	North America	United States	FALSE	2	0	0	0	0	0	0	2	2	0	2	1
488	Columba guinea	Speckled pigeon	North America	United States	FALSE	4	2	0	0	0	0	0	6	4	2	6	0.666667
489	Columba guinea	Speckled pigeon	North America	United States	FALSE	0	1	1	0	0	0	0	2	0	1	1	0
491	Columba guinea guinea	Speckled pigeon	North America	United States	FALSE	0	2	0	0	0	0	0	2	0	2	2	0
492	Columba guinea phaeonota	Speckled pigeon	North America	United States	FALSE	2	2	0	0	0	0	0	4	2	2	4	0.5
493	Columba guinea phaeonota	Speckled pigeon	North America	United States	FALSE	0	1	0	0	0	0	0	1	0	1	1	0
494	Columba guinea phaeonota	Speckled pigeon	North America	United States	FALSE	1	2	0	0	0	0	0	3	1	2	3	0.333333
495	Columba guinea phaeonota	Speckled pigeon	North America	United States	FALSE	8	1	0	0	0	0	2	11	8	1	9	0.888889
496	Columba guinea phaeonota	Speckled pigeon	North America	United States	FALSE	1	0	0	0	0	0	0	1	1	0	1	1
497	Columba guinea phaeonota	Speckled pigeon	North America	United States	FALSE	1	0	7	0	0	0	0	8	1	0	1	1
498	Columba iriditorques	Gabon bronze-naped pigeon	Asia	Singapore	FALSE	0	4	0	0	0	0	0	4	0	4	4	0
499	Columba janthina	Japanses wood pigeon	Asia	Japan	TRUE	1	0	0	0	0	0	0	1	1	0	1	1
500	Columba janthina	Japanses wood pigeon	Asia	Japan	TRUE	0	1	0	0	0	0	0	1	0	1	1	0
501	Columba janthina	Japanses wood pigeon	Asia	Japan	TRUE	0	2	0	0	0	0	0	2	0	2	2	0
503	Columba janthina janthina	Japanese wood pigeon	Asia	Japan	TRUE	1	0	0	0	0	0	0	1	1	0	1	1
504	Columba janthina nitens	Red-headed wood pigeon	Asia	Japan	TRUE	1	1	0	0	0	0	0	2	1	1	2	0.5
505	Columba janthina nitens	Red-headed wood pigeon	Asia	Japan	TRUE	19	18	7	5	0	0	0	44	19	18	37	0.513514
506	Columba janthina nitens	Red-headed wood pigeon	Asia	Japan	TRUE	12	18	4	4	0	0	0	34	12	18	30	0.4
509	Columba leucomela	White-headed Pigeon	Australia (Oceania)	Australia	TRUE	6	2	6	0	0	0	0	14	6	2	8	0.75
510	Columba leucomela	White-headed Pigeon	Australia (Oceania)	Australia	TRUE	2	1	6	0	0	0	0	9	2	1	3	0.666667
512	Columba leucomela	White-headed Pigeon	Australia (Oceania)	Australia	TRUE	0	2	0	0	0	0	0	2	0	2	2	0
513	Columba leucomela	White-headed Pigeon	Australia (Oceania)	Australia	TRUE	5	2	15	5	0	0	0	22	5	2	7	0.714286
514	Columba leucomela	White-headed Pigeon	Australia (Oceania)	Australia	TRUE	3	2	3	0	0	0	0	8	3	2	5	0.6
515	Columba leucomela	White-headed Pigeon	Australia (Oceania)	Australia	TRUE	7	30	0	0	0	0	0	37	7	30	37	0.189189
517	Columba leucomela	White-headed Pigeon	Australia (Oceania)	Australia	TRUE	3	1	2	0	0	0	0	6	3	1	4	0.75
518	Columba leucomela	White-headed Pigeon	Australia (Oceania)	Australia	TRUE	2	0	0	0	0	0	0	2	2	0	2	1
519	Columba leucomela	White-headed Pigeon	Australia (Oceania)	Australia	TRUE	0	1	3	0	0	0	0	4	0	1	1	0
520	Columba leucomela	White-headed Pigeon	Europe	Hungary	FALSE	1	1	0	0	0	0	0	2	1	1	2	0.5
522	Columba livia	Rock dove	Asia	Hong Kong	TRUE	5	7	42	0	0	0	0	54	5	7	12	0.416667
524	Columba livia	Rock dove	Asia	Japan	TRUE	4	5	24	0	0	0	0	33	4	5	9	0.444444
530	Columba livia	Rock dove	Europe	Germany	TRUE	0	0	0	0	1	0	5	6	1	0	1	1
534	Columba livia	Rock dove	Europe	Netherlands	TRUE	10	0	0	0	0	0	0	10	10	0	10	1
535	Columba livia	Rock dove	Europe	Russian Federation	FALSE	0	0	0	0	11	10	0	21	11	10	21	0.52381
537	Columba livia	Rock dove	Europe	Switzerland	TRUE	117	116	0	0	0	0	0	233	117	116	233	0.502146
544	Columba livia	Rock dove	North America	United States	FALSE	2	4	16	0	0	0	0	22	2	4	6	0.333333
547	Columba livia	Rock dove	North America	United States	FALSE	3	1	0	1	0	0	0	4	3	1	4	0.75
548	Columba livia	Rock dove	North America	United States	FALSE	0	1	1	0	0	0	0	2	0	1	1	0
550	Columba livia	Rock dove	North America	United States	FALSE	5	2	5	0	0	0	0	12	5	2	7	0.714286
551	Columba livia	Rock dove	North America	United States	FALSE	0	1	0	0	0	0	0	1	0	1	1	0
553	Columba livia	Rock dove	North America	United States	FALSE	1	1	0	0	0	0	0	2	1	1	2	0.5
557	Columba livia livia	Rock dove	Europe	Czech Republic	TRUE	4	5	0	5	0	0	0	9	4	5	9	0.444444
558	Columba livia livia	Rock dove	Europe	Germany	TRUE	3	3	0	0	0	0	0	6	3	3	6	0.5
560	Columba livia livia	Rock dove	Europe	Poland	TRUE	2	2	3	0	0	0	0	7	2	2	4	0.5
562	Columba oenas	Stock dove	Asia	Singapore	FALSE	0	1	0	0	0	0	0	1	0	1	1	0
563	Columba oenas	Stock dove	Europe	Czech Republic	TRUE	0	2	0	0	0	0	0	2	0	2	2	0
564	Columba oenas	Stock dove	Europe	Germany	TRUE	1	6	0	0	0	0	0	7	1	6	7	0.142857
566	Columba oenas	Stock dove	Europe	Spain	TRUE	12	2	0	0	0	0	0	14	12	2	14	0.857143
567	Columba oenas	Stock dove	North America	United States	FALSE	1	0	1	0	0	0	0	2	1	0	1	1
568	Columba palumbus	Wood pigeon	Europe	Belarus	TRUE	1	0	0	0	0	0	0	1	1	0	1	1
569	Columba palumbus	Wood pigeon	Europe	Czech Republic	TRUE	3	4	0	0	0	0	0	7	3	4	7	0.428571
571	Columba palumbus	Wood pigeon	Europe	Germany	TRUE	1	0	0	0	0	0	0	1	1	0	1	1
574	Columba palumbus	Wood pigeon	Europe	Russian Federation	FALSE	1	1	2	0	0	0	0	4	1	1	2	0.5
575	Columba palumbus	Wood pigeon	Europe	Russian Federation	FALSE	2	0	0	0	0	0	0	2	2	0	2	1
576	Columba palumbus	Wood pigeon	Europe	Russian Federation	FALSE	0	0	0	0	0	1	0	1	0	1	1	0
577	Columba palumbus	Wood pigeon	Europe	Spain	TRUE	3	4	2	0	0	0	0	9	3	4	7	0.428571
580	Columba palumbus	Wood pigeon	North America	United States	FALSE	0	1	0	0	0	0	0	1	0	1	1	0
581	Columba pulchricollis	Ashy wood pigeon	Asia	Taiwan	TRUE	0	1	0	0	0	0	0	1	0	1	1	0
582	Columba pulchricollis	Ashy wood pigeon	Europe	Czech Republic	FALSE	1	0	0	0	0	0	0	1	1	0	1	1
583	Columba pulchricollis	Ashy wood pigeon	Europe	Hungary	FALSE	1	0	0	0	0	0	0	1	1	0	1	1
584	Columba pulchricollis	Ashy wood pigeon	North America	United States	FALSE	0	1	0	0	0	0	0	1	0	1	1	0
585	Columba punicea	Pale-capped pigeon	Asia	Singapore	TRUE	0	1	0	0	0	0	0	1	0	1	1	0
588	Columba vitiensis	Metallic pigeon	Australia (Oceania)	Papua New Guinea	TRUE	1	0	0	0	0	0	0	1	1	0	1	1
589	Columba vitiensis griseogularis	White-throated wood pigeon	Europe	Czech Republic	FALSE	3	5	0	1	0	0	0	8	3	5	8	0.375
590	Columba vitiensis griseogularis	White-throated wood pigeon	Europe	Czech Republic	FALSE	1	1	0	0	0	0	0	2	1	1	2	0.5
591	Columba vitiensis griseogularis	White-throated wood pigeon	Europe	Germany	FALSE	0	1	0	0	0	0	0	1	0	1	1	0
592	Columba vitiensis hypoenochroa	White-throated pigeon	Australia (Oceania)	New Caledonia	TRUE	7	3	9	3	0	0	0	19	7	3	10	0.7
593	Columba vitiensis metallica	White-throated pigeon	Asia	Singapore	TRUE	0	1	0	0	0	0	0	1	0	1	1	0
594	Drepanoptila holosericea	Cloven-feathered dove	Australia (Oceania)	New Caledonia	TRUE	1	0	0	0	0	0	0	1	1	0	1	1
598	Ducula aenea	Green imperial pigeon	Asia	Hong Kong	TRUE	4	3	7	0	0	0	0	14	4	3	7	0.571429
599	Ducula aenea	Green imperial pigeon	Asia	Singapore	TRUE	3	0	0	0	0	0	0	3	3	0	3	1
600	Ducula aenea	Green imperial pigeon	Asia	Sri Lanka	FALSE	2	1	1	0	0	0	0	4	2	1	3	0.666667
603	Ducula aenea	Green imperial pigeon	Europe	France	FALSE	0	1	2	0	0	0	0	3	0	1	1	0
604	Ducula aenea	Green imperial pigeon	Europe	Greece	FALSE	1	0	0	0	0	0	0	1	1	0	1	1
606	Ducula aenea aenea	Green imperial pigeon	Europe	United Kingdom	FALSE	0	1	0	0	0	0	0	1	0	1	1	0
607	Ducula aenea paulina	Green imperial pigeon	Asia	Singapore	TRUE	2	3	0	0	0	0	0	5	2	3	5	0.4
608	Ducula aenea paulina	Green imperial pigeon	Europe	Czech Republic	FALSE	0	2	0	0	0	0	0	2	0	2	2	0
609	Ducula aenea paulina	Green imperial pigeon	Europe	Czech Republic	FALSE	2	2	0	0	0	0	0	4	2	2	4	0.5
610	Ducula aenea paulina	Green imperial pigeon	Europe	France	FALSE	3	0	0	0	0	0	0	3	3	0	3	1
611	Ducula aenea paulina	Green imperial pigeon	Europe	France	FALSE	3	1	2	2	0	0	0	6	3	1	4	0.75
612	Ducula aenea paulina	Green imperial pigeon	Europe	Germany	FALSE	4	3	0	0	0	0	0	7	4	3	7	0.571429
613	Ducula aenea paulina	Green imperial pigeon	Europe	Netherlands	FALSE	11	4	0	5	0	0	0	15	11	4	15	0.733333
614	Ducula aenea paulina	Green imperial pigeon	Europe	Poland	FALSE	1	1	0	0	0	0	0	2	1	1	2	0.5
615	Ducula aenea paulina	Green imperial pigeon	Europe	Poland	FALSE	2	1	0	0	0	0	0	3	2	1	3	0.666667
616	Ducula aenea paulina	Green imperial pigeon	Europe	United Kingdom	FALSE	2	1	0	0	0	0	0	3	2	1	3	0.666667
617	Ducula aenea paulina	Green imperial pigeon	Europe	United Kingdom	FALSE	1	0	0	0	0	0	0	1	1	0	1	1
618	Ducula aenea paulina	Green imperial pigeon	North America	United States	FALSE	1	0	0	0	0	0	0	1	1	0	1	1
619	Ducula aenea paulina	Green imperial pigeon	North America	United States	FALSE	1	3	0	0	0	0	0	4	1	3	4	0.25
620	Ducula aenea paulina	Green imperial pigeon	North America	United States	FALSE	0	1	2	0	0	0	0	3	0	1	1	0
621	Ducula aenea paulina	Green imperial pigeon	North America	United States	FALSE	1	1	0	0	0	0	0	2	1	1	2	0.5
622	Ducula aenea paulina	Green imperial pigeon	North America	United States	FALSE	6	8	6	6	0	0	0	20	6	8	14	0.428571
623	Ducula aenea paulina	Green imperial pigeon	North America	United States	FALSE	1	3	0	0	0	0	0	4	1	3	4	0.25
624	Ducula bicolor	Pied imperial pigeon	Asia	Cyprus	FALSE	5	2	0	0	0	0	0	7	5	2	7	0.714286
626	Ducula bicolor	Pied imperial pigeon	Asia	Hong Kong	FALSE	5	1	27	0	0	0	0	33	5	1	6	0.833333
627	Ducula bicolor	Pied imperial pigeon	Asia	Japan	FALSE	3	5	0	0	0	0	0	8	3	5	8	0.375
628	Ducula bicolor	Pied imperial pigeon	Asia	Japan	FALSE	1	0	0	0	0	0	0	1	1	0	1	1
629	Ducula bicolor	Pied imperial pigeon	Asia	Japan	FALSE	1	0	0	0	0	0	0	1	1	0	1	1
630	Ducula bicolor	Pied imperial pigeon	Asia	Japan	FALSE	1	0	0	0	0	0	0	1	1	0	1	1
631	Ducula bicolor	Pied imperial pigeon	Asia	Japan	FALSE	1	0	0	0	0	0	0	1	1	0	1	1
632	Ducula bicolor	Pied imperial pigeon	Asia	Kazakhstan	FALSE	1	1	0	0	0	0	0	2	1	1	2	0.5
633	Ducula bicolor	Pied imperial pigeon	Asia	Singapore	FALSE	8	6	16	0	15	11	100	156	23	17	40	0.575
634	Ducula bicolor	Pied imperial pigeon	Asia	Singapore	FALSE	1	1	7	0	0	0	0	9	1	1	2	0.5
635	Ducula bicolor	Pied imperial pigeon	Asia	Taiwan	FALSE	3	0	1	0	0	0	0	4	3	0	3	1
641	Ducula bicolor	Pied imperial pigeon	Australia (Oceania)	Australia	FALSE	0	4	0	0	0	0	0	4	0	4	4	0
642	Ducula bicolor	Pied imperial pigeon	Australia (Oceania)	Australia	FALSE	5	0	0	0	0	0	0	5	5	0	5	1
643	Ducula bicolor	Pied imperial pigeon	Australia (Oceania)	Australia	FALSE	0	1	0	0	0	0	0	1	0	1	1	0
644	Ducula bicolor	Pied imperial pigeon	Australia (Oceania)	Australia	FALSE	0	0	0	0	1	1	6	8	1	1	2	0.5
646	Ducula bicolor	Pied imperial pigeon	Australia (Oceania)	Australia	FALSE	7	2	0	0	0	0	0	9	7	2	9	0.777778
647	Ducula bicolor	Pied imperial pigeon	Australia (Oceania)	New Caledonia	FALSE	16	10	5	1	0	0	0	31	16	10	26	0.615385
648	Ducula bicolor	Pied imperial pigeon	Europe	Austria	FALSE	2	1	9	0	0	0	0	12	2	1	3	0.666667
649	Ducula bicolor	Pied imperial pigeon	Europe	Belgium	FALSE	8	9	0	6	0	0	0	17	8	9	17	0.470588
650	Ducula bicolor	Pied imperial pigeon	Europe	Croatia	FALSE	1	0	0	0	0	0	0	1	1	0	1	1
651	Ducula bicolor	Pied imperial pigeon	Europe	Czech Republic	FALSE	2	2	0	0	0	0	0	4	2	2	4	0.5
652	Ducula bicolor	Pied imperial pigeon	Europe	Czech Republic	FALSE	1	0	0	0	0	0	0	1	1	0	1	1
653	Ducula bicolor	Pied imperial pigeon	Europe	Czech Republic	FALSE	6	6	0	2	0	0	0	12	6	6	12	0.5
654	Ducula bicolor	Pied imperial pigeon	Europe	Denmark	FALSE	1	3	9	1	0	0	0	13	1	3	4	0.25
656	Ducula bicolor	Pied imperial pigeon	Europe	France	FALSE	2	2	2	0	0	0	0	6	2	2	4	0.5
657	Ducula bicolor	Pied imperial pigeon	Europe	France	FALSE	1	0	0	0	0	0	0	1	1	0	1	1
658	Ducula bicolor	Pied imperial pigeon	Europe	France	FALSE	12	6	1	3	0	0	0	19	12	6	18	0.666667
659	Ducula bicolor	Pied imperial pigeon	Europe	France	FALSE	1	4	6	0	0	0	0	11	1	4	5	0.2
660	Ducula bicolor	Pied imperial pigeon	Europe	France	FALSE	2	1	0	0	0	0	0	3	2	1	3	0.666667
661	Ducula bicolor	Pied imperial pigeon	Europe	France	FALSE	7	4	0	0	0	0	0	11	7	4	11	0.636364
662	Ducula bicolor	Pied imperial pigeon	Europe	France	FALSE	8	7	0	4	0	0	0	15	8	7	15	0.533333
663	Ducula bicolor	Pied imperial pigeon	Europe	France	FALSE	5	5	8	1	0	0	0	18	5	5	10	0.5
664	Ducula bicolor	Pied imperial pigeon	Europe	Germany	FALSE	1	0	0	0	0	0	0	1	1	0	1	1
665	Ducula bicolor	Pied imperial pigeon	Europe	Germany	FALSE	2	2	1	1	0	0	0	5	2	2	4	0.5
666	Ducula bicolor	Pied imperial pigeon	Europe	Germany	FALSE	2	3	3	2	0	0	0	8	2	3	5	0.4
667	Ducula bicolor	Pied imperial pigeon	Europe	Germany	FALSE	1	1	0	0	0	0	0	2	1	1	2	0.5
668	Ducula bicolor	Pied imperial pigeon	Europe	Germany	FALSE	3	2	0	0	0	0	0	5	3	2	5	0.6
669	Ducula bicolor	Pied imperial pigeon	Europe	Germany	FALSE	4	3	24	4	0	0	0	31	4	3	7	0.571429
670	Ducula bicolor	Pied imperial pigeon	Europe	Germany	FALSE	1	1	0	0	0	0	0	2	1	1	2	0.5
671	Ducula bicolor	Pied imperial pigeon	Europe	Germany	FALSE	1	1	0	0	0	0	0	2	1	1	2	0.5
672	Ducula bicolor	Pied imperial pigeon	Europe	Germany	FALSE	2	5	0	0	0	0	0	7	2	5	7	0.285714
673	Ducula bicolor	Pied imperial pigeon	Europe	Netherlands	FALSE	1	1	4	1	0	0	0	6	1	1	2	0.5
674	Ducula bicolor	Pied imperial pigeon	Europe	Netherlands	FALSE	8	6	0	0	0	0	0	14	8	6	14	0.571429
675	Ducula bicolor	Pied imperial pigeon	Europe	Netherlands	FALSE	2	0	0	0	0	0	0	2	2	0	2	1
676	Ducula bicolor	Pied imperial pigeon	Europe	Netherlands	FALSE	4	2	0	0	0	0	0	6	4	2	6	0.666667
677	Ducula bicolor	Pied imperial pigeon	Europe	Poland	FALSE	0	2	0	0	0	0	0	2	0	2	2	0
678	Ducula bicolor	Pied imperial pigeon	Europe	Poland	FALSE	1	1	0	0	0	0	0	2	1	1	2	0.5
679	Ducula bicolor	Pied imperial pigeon	Europe	Poland	FALSE	1	1	0	0	0	0	0	2	1	1	2	0.5
680	Ducula bicolor	Pied imperial pigeon	Europe	Portugal	FALSE	1	4	0	0	0	0	0	5	1	4	5	0.2
681	Ducula bicolor	Pied imperial pigeon	Europe	Portugal	FALSE	0	1	9	0	0	0	0	10	0	1	1	0
682	Ducula bicolor	Pied imperial pigeon	Europe	Portugal	FALSE	2	3	0	0	0	0	0	5	2	3	5	0.4
683	Ducula bicolor	Pied imperial pigeon	Europe	Romania	FALSE	1	0	0	0	0	0	0	1	1	0	1	1
684	Ducula bicolor	Pied imperial pigeon	Europe	Russian Federation	FALSE	0	2	0	0	0	0	0	2	0	2	2	0
686	Ducula bicolor	Pied imperial pigeon	Europe	Russian Federation	FALSE	4	1	0	0	0	0	0	5	4	1	5	0.8
687	Ducula bicolor	Pied imperial pigeon	Europe	Slovakia	FALSE	2	2	0	0	0	0	0	4	2	2	4	0.5
688	Ducula bicolor	Pied imperial pigeon	Europe	Spain	FALSE	2	2	0	0	0	0	0	4	2	2	4	0.5
689	Ducula bicolor	Pied imperial pigeon	Europe	Spain	FALSE	2	1	0	0	0	0	0	3	2	1	3	0.666667
690	Ducula bicolor	Pied imperial pigeon	Europe	Spain	FALSE	2	0	0	0	0	0	0	2	2	0	2	1
691	Ducula bicolor	Pied imperial pigeon	Europe	Spain	FALSE	1	1	0	0	0	0	0	2	1	1	2	0.5
692	Ducula bicolor	Pied imperial pigeon	Europe	Spain	FALSE	2	0	0	0	0	0	0	2	2	0	2	1
694	Ducula bicolor	Pied imperial pigeon	Europe	United Kingdom	FALSE	5	5	0	2	0	0	0	10	5	5	10	0.5
695	Ducula bicolor	Pied imperial pigeon	Europe	United Kingdom	FALSE	2	3	0	0	0	0	0	5	2	3	5	0.4
696	Ducula bicolor	Pied imperial pigeon	Europe	United Kingdom	FALSE	3	3	0	0	0	0	0	6	3	3	6	0.5
697	Ducula bicolor	Pied imperial pigeon	Europe	United Kingdom	FALSE	1	0	0	0	0	0	0	1	1	0	1	1
698	Ducula bicolor	Pied imperial pigeon	Europe	United Kingdom	FALSE	0	1	0	0	0	0	0	1	0	1	1	0
699	Ducula bicolor	Pied imperial pigeon	Europe	United Kingdom	FALSE	1	1	0	0	0	0	0	2	1	1	2	0.5
700	Ducula bicolor	Pied imperial pigeon	Europe	United Kingdom	FALSE	0	1	0	0	0	0	0	1	0	1	1	0
701	Ducula bicolor	Pied imperial pigeon	Europe	United Kingdom	FALSE	0	1	0	0	0	0	0	1	0	1	1	0
702	Ducula bicolor	Pied imperial pigeon	Europe	United Kingdom	FALSE	4	2	4	0	0	0	0	10	4	2	6	0.666667
704	Ducula bicolor	Pied imperial pigeon	Europe	United Kingdom	FALSE	1	2	0	0	0	0	0	3	1	2	3	0.333333
705	Ducula bicolor	Pied imperial pigeon	North America	Canada	FALSE	4	6	1	0	0	0	0	11	4	6	10	0.4
706	Ducula bicolor	Pied imperial pigeon	North America	United States	FALSE	1	0	0	0	0	0	0	1	1	0	1	1
707	Ducula bicolor	Pied imperial pigeon	North America	United States	FALSE	2	0	0	0	0	0	0	2	2	0	2	1
708	Ducula bicolor	Pied imperial pigeon	North America	United States	FALSE	1	2	0	0	0	0	0	3	1	2	3	0.333333
709	Ducula bicolor	Pied imperial pigeon	North America	United States	FALSE	2	5	0	0	0	0	0	7	2	5	7	0.285714
710	Ducula bicolor	Pied imperial pigeon	North America	United States	FALSE	2	0	0	0	0	0	0	2	2	0	2	1
711	Ducula bicolor	Pied imperial pigeon	North America	United States	FALSE	1	1	0	0	0	0	0	2	1	1	2	0.5
712	Ducula bicolor	Pied imperial pigeon	North America	United States	FALSE	2	2	0	1	0	0	0	4	2	2	4	0.5
713	Ducula bicolor	Pied imperial pigeon	North America	United States	FALSE	19	15	0	7	0	0	0	34	19	15	34	0.558824
714	Ducula bicolor	Pied imperial pigeon	North America	United States	FALSE	6	5	0	0	0	0	0	11	6	5	11	0.545455
715	Ducula bicolor	Pied imperial pigeon	North America	United States	FALSE	1	0	1	0	0	0	0	2	1	0	1	1
716	Ducula bicolor	Pied imperial pigeon	North America	United States	FALSE	3	3	0	0	0	0	0	6	3	3	6	0.5
717	Ducula bicolor	Pied imperial pigeon	North America	United States	FALSE	1	0	0	0	0	0	0	1	1	0	1	1
718	Ducula bicolor	Pied imperial pigeon	North America	United States	FALSE	0	1	0	0	0	0	0	1	0	1	1	0
719	Ducula bicolor	Pied imperial pigeon	North America	United States	FALSE	2	0	0	0	0	0	0	2	2	0	2	1
720	Ducula bicolor	Pied imperial pigeon	North America	United States	FALSE	2	0	0	0	0	0	0	2	2	0	2	1
721	Ducula bicolor	Pied imperial pigeon	North America	United States	FALSE	5	4	0	0	0	0	0	9	5	4	9	0.555556
722	Ducula bicolor	Pied imperial pigeon	North America	United States	FALSE	0	1	0	0	0	0	0	1	0	1	1	0
723	Ducula bicolor	Pied imperial pigeon	North America	United States	FALSE	1	1	0	0	0	0	0	2	1	1	2	0.5
724	Ducula bicolor	Pied imperial pigeon	North America	United States	FALSE	0	2	0	0	0	0	0	2	0	2	2	0
725	Ducula bicolor	Pied imperial pigeon	North America	United States	FALSE	13	11	0	2	0	0	0	24	13	11	24	0.541667
726	Ducula bicolor	Pied imperial pigeon	North America	United States	FALSE	2	0	0	0	0	0	0	2	2	0	2	1
727	Ducula bicolor	Pied imperial pigeon	North America	United States	FALSE	0	2	0	0	0	0	0	2	0	2	2	0
729	Ducula bicolor	Pied imperial pigeon	North America	United States	FALSE	3	5	0	0	0	0	0	8	3	5	8	0.375
730	Ducula bicolor	Pied imperial pigeon	North America	United States	FALSE	7	2	3	0	0	0	0	12	7	2	9	0.777778
731	Ducula bicolor	Pied imperial pigeon	North America	United States	FALSE	4	6	3	0	0	0	0	13	4	6	10	0.4
732	Ducula bicolor	Pied imperial pigeon	North America	United States	FALSE	2	2	0	0	0	0	0	4	2	2	4	0.5
733	Ducula bicolor	Pied imperial pigeon	North America	United States	FALSE	3	1	1	0	0	0	0	5	3	1	4	0.75
734	Ducula bicolor	Pied imperial pigeon	North America	United States	FALSE	3	6	0	0	0	0	0	9	3	6	9	0.333333
735	Ducula bicolor	Pied imperial pigeon	North America	United States	FALSE	1	0	0	0	0	0	0	1	1	0	1	1
736	Ducula bicolor	Pied imperial pigeon	North America	United States	FALSE	0	1	0	0	0	0	0	1	0	1	1	0
737	Ducula bicolor	Pied imperial pigeon	North America	United States	FALSE	3	1	0	0	0	0	0	4	3	1	4	0.75
738	Ducula bicolor	Pied imperial pigeon	North America	United States	FALSE	4	2	3	0	0	0	0	9	4	2	6	0.666667
739	Ducula carola	Spotted imperial pigeon	Asia	Singapore	FALSE	2	0	0	0	0	0	0	2	2	0	2	1
740	Ducula carola	Spotted imperial pigeon	Europe	Czech Republic	FALSE	1	0	0	0	0	0	0	1	1	0	1	1
741	Ducula carola	Spotted imperial pigeon	Europe	Czech Republic	FALSE	2	3	0	0	0	0	0	5	2	3	5	0.4
742	Ducula carola	Spotted imperial pigeon	Europe	Germany	FALSE	2	0	0	0	0	0	0	2	2	0	2	1
743	Ducula carola carola	Spotted imperial pigeon	Europe	Czech Republic	FALSE	1	1	0	0	0	0	0	2	1	1	2	0.5
744	Ducula concinna	Blue-tailed imperial pigeon	Asia	Singapore	FALSE	1	0	0	0	0	0	0	1	1	0	1	1
745	Ducula goliath	Giant pigeon	Asia	Japan	FALSE	1	1	0	0	0	0	0	2	1	1	2	0.5
746	Ducula goliath	Giant pigeon	Asia	Japan	FALSE	5	3	0	0	0	0	0	8	5	3	8	0.625
747	Ducula goliath	Giant pigeon	Australia (Oceania)	New Caledonia	TRUE	2	3	1	0	0	0	0	6	2	3	5	0.4
748	Ducula luctuosa	Sulawesi imperial pigeon	Asia	Singapore	FALSE	5	4	4	4	0	0	0	13	5	4	9	0.555556
749	Ducula luctuosa	Sulawesi imperial pigeon	Europe	Czech Republic	FALSE	4	1	0	0	0	0	0	5	4	1	5	0.8
750	Ducula mullerii	Muller's imperial pigeon	Europe	Germany	FALSE	0	1	0	0	0	0	0	1	0	1	1	0
751	Ducula mullerii	Muller's imperial pigeon	North America	United States	FALSE	2	0	0	0	0	0	0	2	2	0	2	1
752	Ducula mullerii mullerii	Black-collared fruit pigeon	Europe	Germany	FALSE	0	2	0	0	0	0	0	2	0	2	2	0
753	Ducula myristicivora	New Guinea imperial pigeon	Europe	Russian Federation	FALSE	0	0	0	0	1	0	0	1	1	0	1	1
754	Ducula myristicivora	New Guinea imperial pigeon	Europe	Russian Federation	FALSE	2	2	4	4	0	0	0	8	2	2	4	0.5
755	Ducula pacifica	Pacific fruit pigeon	Asia	Singapore	FALSE	3	3	0	0	0	0	0	6	3	3	6	0.5
756	Ducula pickeringii	Malayan imperial pigeon	Europe	Russian Federation	FALSE	0	0	0	0	1	1	0	2	1	1	2	0.5
757	Ducula pickeringii pickeringii	Grey imperial pigeon	North America	United States	FALSE	1	0	0	0	0	0	0	1	1	0	1	1
758	Ducula pinon	Pinon imperial pigeon	Asia	Hong Kong	FALSE	3	3	6	0	0	0	0	12	3	3	6	0.5
759	Ducula pinon	Pinon imperial pigeon	Asia	Singapore	FALSE	3	0	0	0	0	0	0	3	3	0	3	1
760	Ducula pinon	Pinon imperial pigeon	Asia	Singapore	FALSE	1	2	0	0	0	0	0	3	1	2	3	0.333333
761	Ducula pinon	Pinon imperial pigeon	Europe	Netherlands	FALSE	7	3	1	4	0	0	0	11	7	3	10	0.7
762	Ducula pistrinaria	Grey imperial pigeon	Asia	Singapore	FALSE	4	3	0	0	0	0	0	7	4	3	7	0.571429
763	Ducula pistrinaria	Grey imperial pigeon	Europe	France	FALSE	0	1	0	0	0	0	0	1	0	1	1	0
764	Ducula rosacea	Javan imperial pigeon	Asia	Singapore	FALSE	5	5	0	0	0	0	0	10	5	5	10	0.5
765	Ducula rosacea	Javan imperial pigeon	Europe	Czech Republic	FALSE	1	0	0	0	0	0	0	1	1	0	1	1
766	Ducula rosacea	Javan imperial pigeon	Europe	Czech Republic	FALSE	1	1	0	0	0	0	0	2	1	1	2	0.5
768	Ducula rosacea	Javan imperial pigeon	Europe	Germany	FALSE	1	1	1	1	0	0	0	3	1	1	2	0.5
769	Ducula rosacea	Javan imperial pigeon	Europe	Germany	FALSE	1	1	0	0	0	0	0	2	1	1	2	0.5
770	Ducula rosacea	Javan imperial pigeon	Europe	Poland	FALSE	3	2	0	0	0	0	0	5	3	2	5	0.6
771	Ducula rubricera	Red-knobbed pigeon	Europe	Portugal	FALSE	1	1	0	0	0	0	0	2	1	1	2	0.5
772	Ducula rubricera	Red-knobbed pigeon	North America	United States	FALSE	3	2	0	1	0	0	0	5	3	2	5	0.6
773	Ducula rubricera	Red-knobbed pigeon	North America	United States	FALSE	0	5	0	0	0	0	0	5	0	5	5	0
774	Ducula rubricera rufigula	Red-knobbed pigeon	North America	United States	FALSE	7	5	0	3	0	0	0	12	7	5	12	0.583333
775	Ducula rufigaster	Purple-tailed imperial pigeon	Asia	Hong Kong	FALSE	2	2	2	0	0	0	0	6	2	2	4	0.5
776	Ducula rufigaster	Purple-tailed imperial pigeon	Asia	Singapore	FALSE	1	0	0	0	0	0	0	1	1	0	1	1
778	Ducula rufigaster	Purple-tailed imperial pigeon	North America	United States	FALSE	1	0	0	0	0	0	0	1	1	0	1	1
779	Ducula rufigaster	Purple-tailed imperial pigeon	North America	United States	FALSE	6	8	0	1	0	0	0	14	6	8	14	0.428571
781	Ducula spilorrhoa	Nutmeg pigeon	Australia (Oceania)	Australia	FALSE	11	5	3	2	0	0	0	19	11	5	16	0.6875
782	Ducula spilorrhoa	Nutmeg pigeon	Australia (Oceania)	Australia	FALSE	1	2	8	0	0	0	0	11	1	2	3	0.333333
783	Ducula spilorrhoa	Nutmeg pigeon	Australia (Oceania)	Australia	FALSE	4	2	8	2	0	0	0	14	4	2	6	0.666667
784	Ducula spilorrhoa	Nutmeg pigeon	Australia (Oceania)	Australia	FALSE	3	1	4	0	0	0	8	16	3	1	4	0.75
786	Ducula spilorrhoa	Nutmeg pigeon	Australia (Oceania)	Australia	TRUE	1	0	2	0	0	0	20	23	1	0	1	1
788	Ducula spilorrhoa spilorrhoa	Nutmeg pigeon	Australia (Oceania)	Australia	FALSE	0	1	38	0	0	0	0	39	0	1	1	0
790	Gallicolumba crinigera	Mindanao bleeding-heart dove	Asia	Hong Kong	FALSE	3	3	0	0	0	0	0	6	3	3	6	0.5
791	Gallicolumba crinigera	Mindanao bleeding-heart dove	Asia	Singapore	FALSE	1	2	0	0	0	0	0	3	1	2	3	0.333333
792	Gallicolumba crinigera	Mindanao bleeding-heart dove	Asia	Singapore	FALSE	1	1	0	0	0	0	0	2	1	1	2	0.5
793	Gallicolumba crinigera	Mindanao bleeding-heart dove	Europe	Austria	FALSE	1	1	0	0	0	0	0	2	1	1	2	0.5
794	Gallicolumba crinigera	Mindanao bleeding-heart dove	Europe	Belgium	FALSE	2	1	0	0	0	0	0	3	2	1	3	0.666667
795	Gallicolumba crinigera	Mindanao bleeding-heart dove	Europe	Czech Republic	FALSE	1	0	0	0	0	0	0	1	1	0	1	1
796	Gallicolumba crinigera	Mindanao bleeding-heart dove	Europe	Czech Republic	FALSE	3	2	0	0	0	0	0	5	3	2	5	0.6
797	Gallicolumba crinigera	Mindanao bleeding-heart dove	Europe	Czech Republic	FALSE	1	1	0	0	0	0	0	2	1	1	2	0.5
798	Gallicolumba crinigera	Mindanao bleeding-heart dove	Europe	Czech Republic	FALSE	1	1	0	0	0	0	0	2	1	1	2	0.5
799	Gallicolumba crinigera	Mindanao bleeding-heart dove	Europe	Finland	FALSE	2	0	0	0	0	0	0	2	2	0	2	1
800	Gallicolumba crinigera	Mindanao bleeding-heart dove	Europe	France	FALSE	3	0	5	0	0	0	0	8	3	0	3	1
801	Gallicolumba crinigera	Mindanao bleeding-heart dove	Europe	France	FALSE	0	1	1	0	0	0	0	2	0	1	1	0
802	Gallicolumba crinigera	Mindanao bleeding-heart dove	Europe	Germany	FALSE	2	1	0	1	0	0	0	3	2	1	3	0.666667
803	Gallicolumba crinigera	Mindanao bleeding-heart dove	Europe	Germany	FALSE	1	1	0	0	0	0	0	2	1	1	2	0.5
804	Gallicolumba crinigera	Mindanao bleeding-heart dove	Europe	Germany	FALSE	2	1	0	0	0	0	0	3	2	1	3	0.666667
805	Gallicolumba crinigera	Mindanao bleeding-heart dove	Europe	Germany	FALSE	0	2	0	0	0	0	0	2	0	2	2	0
806	Gallicolumba crinigera	Mindanao bleeding-heart dove	Europe	Germany	FALSE	1	0	0	0	0	0	0	1	1	0	1	1
807	Gallicolumba crinigera	Mindanao bleeding-heart dove	Europe	Germany	FALSE	4	6	1	5	0	0	0	11	4	6	10	0.4
808	Gallicolumba crinigera	Mindanao bleeding-heart dove	Europe	Germany	FALSE	4	2	0	3	0	0	0	6	4	2	6	0.666667
809	Gallicolumba crinigera	Mindanao bleeding-heart dove	Europe	Germany	FALSE	1	1	0	0	0	0	0	2	1	1	2	0.5
810	Gallicolumba crinigera	Mindanao bleeding-heart dove	Europe	Germany	FALSE	1	0	0	0	0	0	0	1	1	0	1	1
811	Gallicolumba crinigera	Mindanao bleeding-heart dove	Europe	Germany	FALSE	2	1	0	0	0	0	0	3	2	1	3	0.666667
812	Gallicolumba crinigera	Mindanao bleeding-heart dove	Europe	Germany	FALSE	1	1	0	0	0	0	0	2	1	1	2	0.5
813	Gallicolumba crinigera	Mindanao bleeding-heart dove	Europe	Jersey	FALSE	4	3	0	0	0	0	0	7	4	3	7	0.571429
814	Gallicolumba crinigera	Mindanao bleeding-heart dove	Europe	Netherlands	FALSE	1	1	0	0	0	0	0	2	1	1	2	0.5
815	Gallicolumba crinigera	Mindanao bleeding-heart dove	Europe	Netherlands	FALSE	1	1	0	0	0	0	0	2	1	1	2	0.5
816	Gallicolumba crinigera	Mindanao bleeding-heart dove	Europe	Poland	FALSE	0	1	0	0	0	0	0	1	0	1	1	0
817	Gallicolumba crinigera	Mindanao bleeding-heart dove	Europe	Poland	FALSE	1	2	1	1	0	0	0	4	1	2	3	0.333333
818	Gallicolumba crinigera	Mindanao bleeding-heart dove	Europe	Poland	FALSE	1	0	0	0	0	0	0	1	1	0	1	1
819	Gallicolumba crinigera	Mindanao bleeding-heart dove	Europe	Poland	FALSE	1	0	0	0	0	0	0	1	1	0	1	1
820	Gallicolumba crinigera	Mindanao bleeding-heart dove	Europe	Slovakia	FALSE	1	0	0	0	0	0	0	1	1	0	1	1
821	Gallicolumba crinigera	Mindanao bleeding-heart dove	Europe	Spain	FALSE	2	2	1	1	0	0	0	5	2	2	4	0.5
822	Gallicolumba crinigera	Mindanao bleeding-heart dove	Europe	Switzerland	FALSE	1	1	0	0	0	0	0	2	1	1	2	0.5
823	Gallicolumba crinigera	Mindanao bleeding-heart dove	Europe	United Kingdom	FALSE	2	1	0	0	0	0	0	3	2	1	3	0.666667
824	Gallicolumba crinigera	Mindanao bleeding-heart dove	Europe	United Kingdom	FALSE	1	1	0	0	0	0	0	2	1	1	2	0.5
825	Gallicolumba crinigera	Mindanao bleeding-heart dove	Europe	United Kingdom	FALSE	3	2	0	0	0	0	0	5	3	2	5	0.6
826	Gallicolumba crinigera	Mindanao bleeding-heart dove	Europe	United Kingdom	FALSE	0	1	0	0	0	0	0	1	0	1	1	0
827	Gallicolumba crinigera	Mindanao bleeding-heart dove	Europe	United Kingdom	FALSE	1	1	2	2	0	0	0	4	1	1	2	0.5
828	Gallicolumba crinigera	Mindanao bleeding-heart dove	Europe	United Kingdom	FALSE	1	3	0	0	0	0	0	4	1	3	4	0.25
829	Gallicolumba crinigera	Mindanao bleeding-heart dove	Europe	United Kingdom	FALSE	3	3	0	2	0	0	0	6	3	3	6	0.5
830	Gallicolumba crinigera	Mindanao bleeding-heart dove	Europe	United Kingdom	FALSE	2	1	0	0	0	0	0	3	2	1	3	0.666667
831	Gallicolumba crinigera	Mindanao bleeding-heart dove	Europe	United Kingdom	FALSE	1	0	1	0	0	0	0	2	1	0	1	1
832	Gallicolumba crinigera	Mindanao bleeding-heart dove	Europe	United Kingdom	FALSE	1	1	1	0	0	0	0	3	1	1	2	0.5
833	Gallicolumba crinigera	Mindanao bleeding-heart dove	Europe	United Kingdom	FALSE	2	2	0	1	0	0	0	4	2	2	4	0.5
834	Gallicolumba crinigera	Mindanao bleeding-heart dove	Europe	United Kingdom	FALSE	1	1	0	0	0	0	0	2	1	1	2	0.5
835	Gallicolumba crinigera	Mindanao bleeding-heart dove	North America	United States	FALSE	1	0	0	0	0	0	0	1	1	0	1	1
836	Gallicolumba crinigera	Mindanao bleeding-heart dove	North America	United States	FALSE	1	0	0	0	0	0	0	1	1	0	1	1
837	Gallicolumba crinigera	Mindanao bleeding-heart dove	North America	United States	FALSE	1	1	0	0	0	0	0	2	1	1	2	0.5
838	Gallicolumba crinigera	Mindanao bleeding-heart dove	North America	United States	FALSE	1	1	0	1	0	0	0	2	1	1	2	0.5
839	Gallicolumba crinigera	Mindanao bleeding-heart dove	North America	United States	FALSE	1	4	0	3	0	0	0	5	1	4	5	0.2
840	Gallicolumba crinigera	Mindanao bleeding-heart dove	North America	United States	FALSE	1	1	0	0	0	0	0	2	1	1	2	0.5
841	Gallicolumba crinigera	Mindanao bleeding-heart dove	North America	United States	FALSE	2	2	1	1	0	0	0	5	2	2	4	0.5
842	Gallicolumba crinigera	Mindanao bleeding-heart dove	North America	United States	FALSE	1	2	1	1	0	0	0	4	1	2	3	0.333333
843	Gallicolumba crinigera	Mindanao bleeding-heart dove	North America	United States	FALSE	1	0	0	0	0	0	0	1	1	0	1	1
844	Gallicolumba crinigera	Mindanao bleeding-heart dove	North America	United States	FALSE	1	0	0	0	0	0	0	1	1	0	1	1
845	Gallicolumba crinigera	Mindanao bleeding-heart dove	North America	United States	FALSE	1	0	0	0	0	0	0	1	1	0	1	1
846	Gallicolumba crinigera	Mindanao bleeding-heart dove	North America	United States	FALSE	0	1	0	0	0	0	0	1	0	1	1	0
847	Gallicolumba crinigera	Mindanao bleeding-heart dove	North America	United States	FALSE	0	1	1	0	0	0	0	2	0	1	1	0
848	Gallicolumba crinigera	Mindanao bleeding-heart dove	North America	United States	FALSE	1	3	0	1	0	0	0	4	1	3	4	0.25
849	Gallicolumba crinigera	Mindanao bleeding-heart dove	North America	United States	FALSE	2	0	0	0	0	0	0	2	2	0	2	1
850	Gallicolumba crinigera	Mindanao bleeding-heart dove	North America	United States	FALSE	1	0	0	0	0	0	0	1	1	0	1	1
851	Gallicolumba crinigera	Mindanao bleeding-heart dove	North America	United States	FALSE	9	6	0	0	0	0	0	15	9	6	15	0.6
852	Gallicolumba keayi	Negros ground dove	Asia	Philippines	TRUE	20	25	25	0	0	0	0	70	20	25	45	0.444444
854	Gallicolumba keayi	Negros ground dove	Asia	Singapore	FALSE	8	5	3	0	0	0	0	16	8	5	13	0.615385
855	Gallicolumba luzonica	Luzon bleeding-heart dove	Africa	South Africa	FALSE	1	0	0	0	0	0	0	1	1	0	1	1
856	Gallicolumba luzonica	Luzon bleeding-heart dove	Asia	Cyprus	FALSE	1	1	0	0	0	0	0	2	1	1	2	0.5
857	Gallicolumba luzonica	Luzon bleeding-heart dove	Asia	Israel	FALSE	1	1	0	0	0	0	0	2	1	1	2	0.5
858	Gallicolumba luzonica	Luzon bleeding-heart dove	Asia	Singapore	FALSE	6	0	3	5	0	0	0	9	6	0	6	1
859	Gallicolumba luzonica	Luzon bleeding-heart dove	Asia	Singapore	FALSE	1	1	1	0	0	0	0	3	1	1	2	0.5
860	Gallicolumba luzonica	Luzon bleeding-heart dove	Australia (Oceania)	Australia	FALSE	4	0	0	0	0	0	0	4	4	0	4	1
861	Gallicolumba luzonica	Luzon bleeding-heart dove	Australia (Oceania)	Australia	FALSE	2	2	0	0	0	0	0	4	2	2	4	0.5
862	Gallicolumba luzonica	Luzon bleeding-heart dove	Australia (Oceania)	Australia	FALSE	1	1	0	0	0	0	0	2	1	1	2	0.5
863	Gallicolumba luzonica	Luzon bleeding-heart dove	Australia (Oceania)	Australia	FALSE	9	8	0	0	0	0	0	17	9	8	17	0.529412
864	Gallicolumba luzonica	Luzon bleeding-heart dove	Australia (Oceania)	New Zealand	FALSE	1	1	0	0	0	0	0	2	1	1	2	0.5
865	Gallicolumba luzonica	Luzon bleeding-heart dove	Europe	Austria	FALSE	1	1	0	0	0	0	0	2	1	1	2	0.5
866	Gallicolumba luzonica	Luzon bleeding-heart dove	Europe	Belgium	FALSE	0	1	1	0	0	0	0	2	0	1	1	0
867	Gallicolumba luzonica	Luzon bleeding-heart dove	Europe	Belgium	FALSE	2	3	0	3	0	0	0	5	2	3	5	0.4
868	Gallicolumba luzonica	Luzon bleeding-heart dove	Europe	Czech Republic	FALSE	0	1	0	0	0	0	0	1	0	1	1	0
869	Gallicolumba luzonica	Luzon bleeding-heart dove	Europe	Czech Republic	FALSE	1	1	0	0	0	0	0	2	1	1	2	0.5
870	Gallicolumba luzonica	Luzon bleeding-heart dove	Europe	Czech Republic	FALSE	1	0	0	0	0	0	0	1	1	0	1	1
871	Gallicolumba luzonica	Luzon bleeding-heart dove	Europe	France	FALSE	2	1	0	0	0	0	0	3	2	1	3	0.666667
872	Gallicolumba luzonica	Luzon bleeding-heart dove	Europe	France	FALSE	3	0	0	0	0	0	0	3	3	0	3	1
873	Gallicolumba luzonica	Luzon bleeding-heart dove	Europe	France	FALSE	1	0	0	0	0	0	0	1	1	0	1	1
874	Gallicolumba luzonica	Luzon bleeding-heart dove	Europe	France	FALSE	1	2	1	0	0	0	0	4	1	2	3	0.333333
875	Gallicolumba luzonica	Luzon bleeding-heart dove	Europe	France	FALSE	1	0	0	0	0	0	0	1	1	0	1	1
876	Gallicolumba luzonica	Luzon bleeding-heart dove	Europe	Germany	FALSE	3	3	0	0	0	0	0	6	3	3	6	0.5
877	Gallicolumba luzonica	Luzon bleeding-heart dove	Europe	Germany	FALSE	0	1	1	0	0	0	0	2	0	1	1	0
878	Gallicolumba luzonica	Luzon bleeding-heart dove	Europe	Germany	FALSE	1	1	0	0	0	0	0	2	1	1	2	0.5
879	Gallicolumba luzonica	Luzon bleeding-heart dove	Europe	Germany	FALSE	3	3	0	0	0	0	0	6	3	3	6	0.5
880	Gallicolumba luzonica	Luzon bleeding-heart dove	Europe	Germany	FALSE	2	2	1	1	0	0	0	5	2	2	4	0.5
881	Gallicolumba luzonica	Luzon bleeding-heart dove	Europe	Greece	FALSE	4	4	0	0	0	0	0	8	4	4	8	0.5
882	Gallicolumba luzonica	Luzon bleeding-heart dove	Europe	Hungary	FALSE	1	1	0	0	0	0	0	2	1	1	2	0.5
883	Gallicolumba luzonica	Luzon bleeding-heart dove	Europe	Netherlands	FALSE	1	1	0	0	0	0	0	2	1	1	2	0.5
884	Gallicolumba luzonica	Luzon bleeding-heart dove	Europe	Netherlands	FALSE	9	3	1	2	0	0	0	13	9	3	12	0.75
885	Gallicolumba luzonica	Luzon bleeding-heart dove	Europe	Netherlands	FALSE	2	0	2	0	0	0	0	4	2	0	2	1
886	Gallicolumba luzonica	Luzon bleeding-heart dove	Europe	Norway	FALSE	1	0	0	0	0	0	0	1	1	0	1	1
887	Gallicolumba luzonica	Luzon bleeding-heart dove	Europe	Poland	FALSE	2	1	0	0	0	0	0	3	2	1	3	0.666667
888	Gallicolumba luzonica	Luzon bleeding-heart dove	Europe	Poland	FALSE	1	0	0	0	0	0	0	1	1	0	1	1
889	Gallicolumba luzonica	Luzon bleeding-heart dove	Europe	Poland	FALSE	1	0	0	0	0	0	0	1	1	0	1	1
890	Gallicolumba luzonica	Luzon bleeding-heart dove	Europe	Poland	FALSE	1	1	0	0	0	0	0	2	1	1	2	0.5
891	Gallicolumba luzonica	Luzon bleeding-heart dove	Europe	Portugal	FALSE	2	0	0	0	0	0	0	2	2	0	2	1
892	Gallicolumba luzonica	Luzon bleeding-heart dove	Europe	Slovakia	FALSE	1	1	0	0	0	0	0	2	1	1	2	0.5
893	Gallicolumba luzonica	Luzon bleeding-heart dove	Europe	Spain	FALSE	1	1	1	1	0	0	0	3	1	1	2	0.5
894	Gallicolumba luzonica	Luzon bleeding-heart dove	Europe	United Kingdom	FALSE	1	1	0	0	0	0	0	2	1	1	2	0.5
895	Gallicolumba luzonica	Luzon bleeding-heart dove	Europe	United Kingdom	FALSE	1	0	0	0	0	0	0	1	1	0	1	1
896	Gallicolumba luzonica	Luzon bleeding-heart dove	Europe	United Kingdom	FALSE	0	3	0	0	0	0	0	3	0	3	3	0
897	Gallicolumba luzonica	Luzon bleeding-heart dove	Europe	United Kingdom	FALSE	1	1	0	0	0	0	0	2	1	1	2	0.5
898	Gallicolumba luzonica	Luzon bleeding-heart dove	Europe	United Kingdom	FALSE	2	1	0	0	0	0	0	3	2	1	3	0.666667
899	Gallicolumba luzonica	Luzon bleeding-heart dove	Europe	United Kingdom	FALSE	4	6	0	2	0	0	0	10	4	6	10	0.4
900	Gallicolumba luzonica	Luzon bleeding-heart dove	Europe	United Kingdom	FALSE	1	1	0	0	0	0	0	2	1	1	2	0.5
901	Gallicolumba luzonica	Luzon bleeding-heart dove	Europe	United Kingdom	FALSE	2	1	0	0	0	0	0	3	2	1	3	0.666667
902	Gallicolumba luzonica	Luzon bleeding-heart dove	Europe	United Kingdom	FALSE	1	1	0	0	0	0	0	2	1	1	2	0.5
903	Gallicolumba luzonica	Luzon bleeding-heart dove	Europe	United Kingdom	FALSE	1	0	1	0	0	0	0	2	1	0	1	1
904	Gallicolumba luzonica	Luzon bleeding-heart dove	Europe	United Kingdom	FALSE	1	3	3	4	0	0	0	7	1	3	4	0.25
905	Gallicolumba luzonica	Luzon bleeding-heart dove	Europe	United Kingdom	FALSE	4	0	0	0	0	0	0	4	4	0	4	1
906	Gallicolumba luzonica	Luzon bleeding-heart dove	Europe	United Kingdom	FALSE	0	1	0	0	0	0	0	1	0	1	1	0
907	Gallicolumba luzonica	Luzon bleeding-heart dove	Europe	United Kingdom	FALSE	2	4	0	3	0	0	0	6	2	4	6	0.333333
908	Gallicolumba luzonica	Luzon bleeding-heart dove	Europe	United Kingdom	FALSE	1	1	0	0	0	0	0	2	1	1	2	0.5
910	Gallicolumba luzonica	Luzon bleeding-heart dove	North America	Canada	FALSE	4	2	0	0	0	0	0	6	4	2	6	0.666667
911	Gallicolumba luzonica	Luzon bleeding-heart dove	North America	United States	FALSE	2	2	0	2	0	0	0	4	2	2	4	0.5
912	Gallicolumba luzonica	Luzon bleeding-heart dove	North America	United States	FALSE	0	3	0	0	0	0	0	3	0	3	3	0
913	Gallicolumba luzonica	Luzon bleeding-heart dove	North America	United States	FALSE	1	1	0	0	0	0	0	2	1	1	2	0.5
914	Gallicolumba luzonica	Luzon bleeding-heart dove	North America	United States	FALSE	1	2	0	0	0	0	0	3	1	2	3	0.333333
915	Gallicolumba luzonica	Luzon bleeding-heart dove	North America	United States	FALSE	1	4	0	0	0	0	0	5	1	4	5	0.2
916	Gallicolumba luzonica	Luzon bleeding-heart dove	North America	United States	FALSE	2	0	0	0	0	0	0	2	2	0	2	1
917	Gallicolumba luzonica	Luzon bleeding-heart dove	North America	United States	FALSE	5	3	1	7	0	0	0	9	5	3	8	0.625
918	Gallicolumba luzonica	Luzon bleeding-heart dove	North America	United States	FALSE	1	0	0	0	0	0	0	1	1	0	1	1
919	Gallicolumba luzonica	Luzon bleeding-heart dove	North America	United States	FALSE	4	3	0	0	0	0	0	7	4	3	7	0.571429
920	Gallicolumba luzonica	Luzon bleeding-heart dove	North America	United States	FALSE	4	2	0	0	0	0	0	6	4	2	6	0.666667
921	Gallicolumba luzonica	Luzon bleeding-heart dove	North America	United States	FALSE	1	0	0	0	0	0	0	1	1	0	1	1
922	Gallicolumba luzonica	Luzon bleeding-heart dove	North America	United States	FALSE	2	1	0	0	0	0	0	3	2	1	3	0.666667
923	Gallicolumba luzonica	Luzon bleeding-heart dove	North America	United States	FALSE	2	2	0	0	0	0	0	4	2	2	4	0.5
924	Gallicolumba luzonica	Luzon bleeding-heart dove	North America	United States	FALSE	1	1	0	0	0	0	0	2	1	1	2	0.5
925	Gallicolumba luzonica	Luzon bleeding-heart dove	North America	United States	FALSE	1	1	0	0	0	0	0	2	1	1	2	0.5
926	Gallicolumba luzonica	Luzon bleeding-heart dove	North America	United States	FALSE	2	0	0	0	0	0	0	2	2	0	2	1
927	Gallicolumba luzonica	Luzon bleeding-heart dove	North America	United States	FALSE	1	1	0	0	0	0	0	2	1	1	2	0.5
928	Gallicolumba luzonica	Luzon bleeding-heart dove	North America	United States	FALSE	1	0	0	0	0	0	0	1	1	0	1	1
929	Gallicolumba luzonica	Luzon bleeding-heart dove	North America	United States	FALSE	1	1	0	0	0	0	0	2	1	1	2	0.5
930	Gallicolumba luzonica	Luzon bleeding-heart dove	North America	United States	FALSE	1	1	0	0	0	0	0	2	1	1	2	0.5
931	Gallicolumba luzonica	Luzon bleeding-heart dove	North America	United States	FALSE	1	0	0	0	0	0	0	1	1	0	1	1
932	Gallicolumba luzonica	Luzon bleeding-heart dove	North America	United States	FALSE	2	1	0	0	0	0	0	3	2	1	3	0.666667
933	Gallicolumba luzonica	Luzon bleeding-heart dove	North America	United States	FALSE	2	0	0	0	0	0	0	2	2	0	2	1
934	Gallicolumba luzonica	Luzon bleeding-heart dove	North America	United States	FALSE	1	1	0	0	0	0	0	2	1	1	2	0.5
935	Gallicolumba luzonica	Luzon bleeding-heart dove	North America	United States	FALSE	5	2	0	4	0	0	0	7	5	2	7	0.714286
936	Gallicolumba luzonica	Luzon bleeding-heart dove	North America	United States	FALSE	6	3	2	3	0	0	0	11	6	3	9	0.666667
937	Gallicolumba luzonica	Luzon bleeding-heart dove	North America	United States	FALSE	1	1	0	0	0	0	0	2	1	1	2	0.5
938	Gallicolumba luzonica	Luzon bleeding-heart dove	South America	Brazil	FALSE	1	0	0	0	0	0	0	1	1	0	1	1
939	Gallicolumba luzonica luzonica	Luzon bleeding-heart dove	North America	United States	FALSE	0	1	0	0	0	0	0	1	0	1	1	0
940	Gallicolumba rufigula	Cinnamon ground dove	Asia	Singapore	FALSE	6	2	1	2	0	0	0	9	6	2	8	0.75
941	Gallicolumba rufigula	Cinnamon ground dove	Europe	Belgium	FALSE	1	1	2	2	0	0	0	4	1	1	2	0.5
942	Gallicolumba rufigula	Cinnamon ground dove	Europe	Czech Republic	FALSE	1	0	1	0	0	0	0	2	1	0	1	1
943	Gallicolumba rufigula	Cinnamon ground dove	Europe	Denmark	FALSE	0	1	0	0	0	0	0	1	0	1	1	0
944	Gallicolumba rufigula	Cinnamon ground dove	Europe	France	FALSE	1	1	0	0	0	0	0	2	1	1	2	0.5
945	Gallicolumba rufigula	Cinnamon ground dove	Europe	Germany	FALSE	1	0	0	0	0	0	0	1	1	0	1	1
946	Gallicolumba rufigula	Cinnamon ground dove	Europe	Germany	FALSE	1	1	0	0	0	0	0	2	1	1	2	0.5
947	Gallicolumba rufigula	Cinnamon ground dove	Europe	Germany	FALSE	3	1	1	0	0	0	0	5	3	1	4	0.75
948	Gallicolumba rufigula	Cinnamon ground dove	Europe	Poland	FALSE	1	0	0	0	0	0	0	1	1	0	1	1
949	Gallicolumba rufigula	Cinnamon ground dove	Europe	United Kingdom	FALSE	6	8	2	8	0	0	0	16	6	8	14	0.428571
950	Gallicolumba rufigula	Cinnamon ground dove	Europe	United Kingdom	FALSE	2	3	0	0	0	0	0	5	2	3	5	0.4
951	Gallicolumba rufigula	Cinnamon ground dove	Europe	United Kingdom	FALSE	2	0	0	0	0	0	0	2	2	0	2	1
952	Gallicolumba rufigula rufigula	Cinnamon ground dove	Europe	Czech Republic	FALSE	1	2	0	0	0	0	0	3	1	2	3	0.333333
953	Gallicolumba rufigula rufigula	Cinnamon ground dove	Europe	Denmark	FALSE	1	0	0	0	0	0	0	1	1	0	1	1
954	Gallicolumba rufigula rufigula	Cinnamon ground dove	Europe	France	FALSE	1	1	0	0	0	0	0	2	1	1	2	0.5
955	Gallicolumba rufigula rufigula	Cinnamon ground dove	Europe	France	FALSE	1	0	0	0	0	0	0	1	1	0	1	1
956	Gallicolumba rufigula rufigula	Cinnamon ground dove	Europe	Germany	FALSE	2	2	0	0	0	0	0	4	2	2	4	0.5
957	Gallicolumba rufigula rufigula	Cinnamon ground dove	Europe	Netherlands	FALSE	2	5	0	2	0	0	0	7	2	5	7	0.285714
958	Gallicolumba rufigula rufigula	Cinnamon ground dove	Europe	Portugal	FALSE	2	2	0	0	0	0	0	4	2	2	4	0.5
959	Gallicolumba tristigmata	Sulawesi ground dove	Asia	Hong Kong	FALSE	1	0	0	0	0	0	0	1	1	0	1	1
960	Gallicolumba tristigmata	Sulawesi ground dove	Asia	Singapore	FALSE	12	7	9	9	0	0	0	28	12	7	19	0.631579
961	Gallicolumba tristigmata	Sulawesi ground dove	Asia	Singapore	FALSE	1	1	0	0	0	0	0	2	1	1	2	0.5
962	Gallicolumba tristigmata	Sulawesi ground dove	Europe	Germany	FALSE	2	2	0	0	0	0	0	4	2	2	4	0.5
963	Gallicolumba tristigmata	Sulawesi ground dove	Europe	Netherlands	FALSE	2	1	0	2	0	0	0	3	2	1	3	0.666667
964	Gallicolumba tristigmata	Sulawesi ground dove	Europe	Netherlands	FALSE	1	1	2	0	0	0	0	4	1	1	2	0.5
966	Gallicolumba tristigmata	Sulawesi ground dove	Europe	Portugal	FALSE	1	0	0	0	0	0	0	1	1	0	1	1
967	Gallicolumba tristigmata	Sulawesi ground dove	Europe	United Kingdom	FALSE	1	0	0	0	0	0	0	1	1	0	1	1
968	Gallicolumba tristigmata	Sulawesi ground dove	Europe	United Kingdom	FALSE	1	0	0	0	0	0	0	1	1	0	1	1
969	Gallicolumba tristigmata	Sulawesi ground dove	North America	United States	FALSE	1	0	7	0	0	0	0	8	1	0	1	1
970	Gallicolumba tristigmata	Sulawesi ground dove	North America	United States	FALSE	2	0	0	0	0	0	0	2	2	0	2	1
971	Gallicolumba tristigmata	Sulawesi ground dove	North America	United States	FALSE	2	0	0	0	0	0	0	2	2	0	2	1
972	Gallicolumba tristigmata	Sulawesi ground dove	North America	United States	FALSE	1	1	0	0	1	0	0	3	2	1	3	0.666667
973	Gallicolumba tristigmata	Sulawesi ground dove	North America	United States	FALSE	2	3	0	0	0	0	0	5	2	3	5	0.4
974	Gallicolumba tristigmata	Sulawesi ground dove	North America	United States	FALSE	1	1	0	0	0	0	0	2	1	1	2	0.5
975	Gallicolumba tristigmata	Sulawesi ground dove	North America	United States	FALSE	1	0	0	0	0	0	0	1	1	0	1	1
976	Gallicolumba tristigmata	Sulawesi ground dove	North America	United States	FALSE	3	2	0	1	0	0	0	5	3	2	5	0.6
977	Gallicolumba tristigmata	Sulawesi ground dove	North America	United States	FALSE	1	1	0	0	0	0	0	2	1	1	2	0.5
978	Gallicolumba tristigmata	Sulawesi ground dove	North America	United States	FALSE	1	0	0	0	0	0	0	1	1	0	1	1
979	Gallicolumba tristigmata	Sulawesi ground dove	North America	United States	FALSE	0	1	0	0	0	0	0	1	0	1	1	0
980	Gallicolumba tristigmata bimaculata	Sulawesi ground-dove	Asia	Cyprus	FALSE	1	1	0	0	0	0	0	2	1	1	2	0.5
981	Gallicolumba tristigmata bimaculata	Sulawesi ground-dove	Europe	Czech Republic	FALSE	3	2	0	0	0	0	0	5	3	2	5	0.6
982	Gallicolumba tristigmata bimaculata	Sulawesi ground-dove	Europe	Germany	FALSE	5	1	0	0	0	0	0	6	5	1	6	0.833333
983	Gallicolumba tristigmata bimaculata	Sulawesi ground-dove	Europe	Netherlands	FALSE	0	1	0	0	0	0	0	1	0	1	1	0
984	Gallicolumba tristigmata bimaculata	Sulawesi ground-dove	Europe	Poland	FALSE	1	0	0	0	0	0	0	1	1	0	1	1
985	Gallicolumba tristigmata bimaculata	Sulawesi ground-dove	Europe	United Kingdom	FALSE	2	1	0	0	0	0	0	3	2	1	3	0.666667
990	Geopelia cuneata	Diamond dove	Asia	Hong Kong	FALSE	1	3	0	0	0	0	0	4	1	3	4	0.25
992	Geopelia cuneata	Diamond dove	Asia	India	FALSE	0	0	0	0	1	1	0	2	1	1	2	0.5
996	Geopelia cuneata	Diamond dove	Asia	Sri Lanka	FALSE	7	12	1	0	3	3	0	26	10	15	25	0.4
998	Geopelia cuneata	Diamond dove	Australia (Oceania)	Australia	FALSE	4	2	18	1	0	0	0	24	4	2	6	0.666667
999	Geopelia cuneata	Diamond dove	Australia (Oceania)	Australia	TRUE	0	1	11	0	0	0	0	12	0	1	1	0
1002	Geopelia cuneata	Diamond dove	Australia (Oceania)	Australia	FALSE	1	0	0	0	0	0	0	1	1	0	1	1
1006	Geopelia cuneata	Diamond dove	Australia (Oceania)	Australia	FALSE	6	7	4	0	0	0	25	42	6	7	13	0.461538
1007	Geopelia cuneata	Diamond dove	Australia (Oceania)	New Zealand	FALSE	10	10	0	0	0	0	0	20	10	10	20	0.5
1008	Geopelia cuneata	Diamond dove	Europe	Austria	FALSE	1	1	21	7	0	0	1	24	1	1	2	0.5
1010	Geopelia cuneata	Diamond dove	Europe	Austria	FALSE	0	0	0	0	4	5	0	9	4	5	9	0.444444
1011	Geopelia cuneata	Diamond dove	Europe	Belgium	FALSE	7	1	0	1	0	0	0	8	7	1	8	0.875
1012	Geopelia cuneata	Diamond dove	Europe	Czech Republic	FALSE	2	0	2	0	0	0	0	4	2	0	2	1
1013	Geopelia cuneata	Diamond dove	Europe	Czech Republic	FALSE	3	2	1	2	0	0	0	6	3	2	5	0.6
1016	Geopelia cuneata	Diamond dove	Europe	Denmark	FALSE	1	1	0	0	0	0	0	2	1	1	2	0.5
1017	Geopelia cuneata	Diamond dove	Europe	Estonia	FALSE	2	0	0	0	0	0	0	2	2	0	2	1
1019	Geopelia cuneata	Diamond dove	Europe	France	FALSE	5	7	0	0	0	0	0	12	5	7	12	0.416667
1020	Geopelia cuneata	Diamond dove	Europe	France	FALSE	0	2	1	0	0	0	0	3	0	2	2	0
1021	Geopelia cuneata	Diamond dove	Europe	France	FALSE	5	5	1	0	0	0	0	11	5	5	10	0.5
1022	Geopelia cuneata	Diamond dove	Europe	Germany	FALSE	2	2	2	1	0	0	2	8	2	2	4	0.5
1024	Geopelia cuneata	Diamond dove	Europe	Germany	FALSE	3	9	0	0	0	0	0	12	3	9	12	0.25
1025	Geopelia cuneata	Diamond dove	Europe	Germany	FALSE	2	5	11	0	0	0	0	18	2	5	7	0.285714
1026	Geopelia cuneata	Diamond dove	Europe	Germany	FALSE	0	0	0	0	1	2	0	3	1	2	3	0.333333
1028	Geopelia cuneata	Diamond dove	Europe	Germany	FALSE	3	3	0	0	0	0	0	6	3	3	6	0.5
1029	Geopelia cuneata	Diamond dove	Europe	Greece	FALSE	3	3	30	0	0	0	20	56	3	3	6	0.5
1030	Geopelia cuneata	Diamond dove	Europe	Hungary	FALSE	0	0	0	0	20	20	7	47	20	20	40	0.5
1032	Geopelia cuneata	Diamond dove	Europe	Netherlands	FALSE	2	2	8	8	0	0	0	12	2	2	4	0.5
1033	Geopelia cuneata	Diamond dove	Europe	Netherlands	FALSE	1	1	0	0	0	0	0	2	1	1	2	0.5
1034	Geopelia cuneata	Diamond dove	Europe	Netherlands	FALSE	0	0	0	0	2	3	0	5	2	3	5	0.4
1035	Geopelia cuneata	Diamond dove	Europe	Netherlands	FALSE	1	2	1	0	0	0	0	4	1	2	3	0.333333
1037	Geopelia cuneata	Diamond dove	Europe	Poland	FALSE	0	0	0	0	2	2	11	15	2	2	4	0.5
1038	Geopelia cuneata	Diamond dove	Europe	Poland	FALSE	2	2	0	0	0	0	19	23	2	2	4	0.5
1040	Geopelia cuneata	Diamond dove	Europe	Romania	FALSE	0	0	0	0	5	5	5	15	5	5	10	0.5
1041	Geopelia cuneata	Diamond dove	Europe	Russian Federation	FALSE	1	0	0	0	0	2	0	3	1	2	3	0.333333
1043	Geopelia cuneata	Diamond dove	Europe	Russian Federation	FALSE	0	0	0	0	2	2	3	7	2	2	4	0.5
1044	Geopelia cuneata	Diamond dove	Europe	Russian Federation	FALSE	1	2	0	0	0	0	0	3	1	2	3	0.333333
1045	Geopelia cuneata	Diamond dove	Europe	Russian Federation	FALSE	1	2	0	0	0	0	0	3	1	2	3	0.333333
1046	Geopelia cuneata	Diamond dove	Europe	Russian Federation	FALSE	1	0	0	0	0	0	0	1	1	0	1	1
1047	Geopelia cuneata	Diamond dove	Europe	Russian Federation	FALSE	1	0	0	0	0	0	0	1	1	0	1	1
1048	Geopelia cuneata	Diamond dove	Europe	Spain	FALSE	1	1	12	0	0	0	0	14	1	1	2	0.5
1049	Geopelia cuneata	Diamond dove	Europe	Spain	FALSE	2	2	0	0	0	0	0	4	2	2	4	0.5
1050	Geopelia cuneata	Diamond dove	Europe	Spain	FALSE	7	10	1	0	0	0	0	18	7	10	17	0.411765
1054	Geopelia cuneata	Diamond dove	Europe	United Kingdom	FALSE	1	0	0	0	0	0	21	22	1	0	1	1
1055	Geopelia cuneata	Diamond dove	Europe	United Kingdom	FALSE	2	2	0	1	0	0	0	4	2	2	4	0.5
1056	Geopelia cuneata	Diamond dove	Europe	United Kingdom	FALSE	0	0	0	0	1	0	0	1	1	0	1	1
1058	Geopelia cuneata	Diamond dove	Europe	United Kingdom	FALSE	7	5	0	0	0	0	0	12	7	5	12	0.583333
1062	Geopelia cuneata	Diamond dove	Europe	United Kingdom	FALSE	1	7	2	0	0	0	0	10	1	7	8	0.125
1063	Geopelia cuneata	Diamond dove	Europe	United Kingdom	FALSE	1	0	2	0	0	0	0	3	1	0	1	1
1065	Geopelia cuneata	Diamond dove	Europe	United Kingdom	FALSE	1	1	4	0	0	0	0	6	1	1	2	0.5
1067	Geopelia cuneata	Diamond dove	North America	United States	FALSE	1	0	0	0	0	0	0	1	1	0	1	1
1068	Geopelia cuneata	Diamond dove	North America	United States	FALSE	1	1	0	0	0	0	0	2	1	1	2	0.5
1070	Geopelia cuneata	Diamond dove	North America	United States	FALSE	13	4	6	0	0	0	0	23	13	4	17	0.764706
1071	Geopelia cuneata	Diamond dove	North America	United States	FALSE	4	6	0	0	0	0	0	10	4	6	10	0.4
1072	Geopelia cuneata	Diamond dove	North America	United States	FALSE	0	1	0	0	0	0	0	1	0	1	1	0
1073	Geopelia cuneata	Diamond dove	North America	United States	FALSE	8	6	17	16	0	0	0	31	8	6	14	0.571429
1074	Geopelia cuneata	Diamond dove	North America	United States	FALSE	6	7	1	0	0	0	0	14	6	7	13	0.461538
1078	Geopelia striata	Zebra dove	Asia	Hong Kong	FALSE	6	14	81	0	0	0	0	101	6	14	20	0.3
1080	Geopelia striata	Zebra dove	Asia	Singapore	FALSE	1	1	1	0	0	0	29	32	1	1	2	0.5
1084	Geopelia striata	Zebra dove	Europe	Hungary	FALSE	0	0	0	0	1	1	0	2	1	1	2	0.5
1086	Geopelia striata	Zebra dove	Europe	Spain	FALSE	1	1	0	2	0	0	33	35	1	1	2	0.5
1088	Geopelia striata	Zebra dove	North America	United States	FALSE	9	3	35	3	0	0	0	47	9	3	12	0.75
1089	Geopelia placida	Peaceful dove	Asia	Cyprus	FALSE	1	1	0	0	0	0	0	2	1	1	2	0.5
1091	Geopelia placida	Peaceful dove	Australia (Oceania)	Australia	TRUE	0	0	0	0	1	1	34	36	1	1	2	0.5
1092	Geopelia placida	Peaceful dove	Australia (Oceania)	Australia	TRUE	3	3	0	0	0	0	0	6	3	3	6	0.5
1093	Geopelia placida	Peaceful dove	Australia (Oceania)	Australia	TRUE	2	2	8	1	0	0	0	12	2	2	4	0.5
1097	Geopelia placida	Peaceful dove	Australia (Oceania)	Australia	TRUE	3	0	0	0	0	0	40	43	3	0	3	1
1099	Geopelia placida	Peaceful dove	Europe	Czech Republic	FALSE	2	3	1	0	0	0	0	6	2	3	5	0.4
1100	Geopelia placida	Peaceful dove	Europe	Germany	FALSE	4	0	0	0	0	0	0	4	4	0	4	1
1101	Geopelia maugei	Barred dove	Europe	United Kingdom	FALSE	2	0	0	0	0	0	0	2	2	0	2	1
1103	Geopelia humeralis	Bar-shouldered dove	Asia	Singapore	FALSE	2	5	2	0	0	0	0	9	2	5	7	0.285714
1104	Geopelia humeralis	Bar-shouldered dove	Australia (Oceania)	Australia	TRUE	18	10	26	4	0	0	0	54	18	10	28	0.642857
1106	Geopelia humeralis	Bar-shouldered dove	Australia (Oceania)	Australia	TRUE	0	4	6	0	0	0	0	10	0	4	4	0
1107	Geopelia humeralis	Bar-shouldered dove	Australia (Oceania)	Australia	TRUE	3	4	0	0	0	0	0	7	3	4	7	0.428571
1109	Geopelia humeralis	Bar-shouldered dove	Australia (Oceania)	Australia	FALSE	0	0	0	0	1	1	2	4	1	1	2	0.5
1111	Geopelia humeralis	Bar-shouldered dove	Australia (Oceania)	Australia	TRUE	0	0	0	0	1	1	4	6	1	1	2	0.5
1115	Geopelia humeralis	Bar-shouldered dove	Australia (Oceania)	Australia	TRUE	0	1	1	0	0	0	0	2	0	1	1	0
1116	Geopelia humeralis	Bar-shouldered dove	Europe	Czech Republic	FALSE	3	2	1	0	0	0	0	6	3	2	5	0.6
1117	Geopelia humeralis	Bar-shouldered dove	Europe	Germany	FALSE	1	0	0	0	0	0	0	1	1	0	1	1
1119	Geopelia humeralis	Bar-shouldered dove	North America	United States	FALSE	1	1	1	0	0	0	0	3	1	1	2	0.5
1120	Geopelia humeralis humeralis	Bar-shouldered dove	Australia (Oceania)	Australia	TRUE	0	1	0	0	0	0	0	1	0	1	1	0
1123	Geotrygon carrikeri	Tuxtla quail dove	North America	Mexico	TRUE	12	11	0	0	0	0	0	23	12	11	23	0.521739
1124	Geotrygon carrikeri	Tuxtla quail dove	North America	Mexico	TRUE	0	1	0	0	0	0	0	1	0	1	1	0
1125	Geotrygon chiriquensis	Chiriqui quail dove	North America	United States	FALSE	3	1	0	0	0	0	0	4	3	1	4	0.75
1126	Geotrygon montana	Ruddy quail dove	Asia	Singapore	FALSE	10	5	3	3	0	0	0	18	10	5	15	0.666667
1128	Geotrygon montana	Ruddy quail dove	Europe	Germany	FALSE	2	1	1	0	0	0	0	4	2	1	3	0.666667
1129	Geotrygon montana	Ruddy quail dove	Europe	Germany	FALSE	5	2	1	0	0	0	0	8	5	2	7	0.714286
1130	Geotrygon montana	Ruddy quail dove	North America	Jamaica	FALSE	0	1	0	0	0	0	0	1	0	1	1	0
1131	Geotrygon montana	Ruddy quail dove	North America	United States	FALSE	3	3	0	0	0	0	0	6	3	3	6	0.5
1132	Geotrygon montana	Ruddy quail dove	South America	Brazil	TRUE	1	0	0	0	0	0	0	1	1	0	1	1
1134	Geotrygon versicolor	Crested quail dove	Asia	Cyprus	FALSE	1	1	0	0	0	0	0	2	1	1	2	0.5
1135	Geotrygon versicolor	Crested quail dove	Asia	Singapore	FALSE	4	6	3	1	0	0	0	13	4	6	10	0.4
1136	Geotrygon versicolor	Crested quail dove	Europe	Austria	FALSE	2	1	0	0	0	0	0	3	2	1	3	0.666667
1137	Geotrygon versicolor	Crested quail dove	Europe	Czech Republic	FALSE	2	0	0	0	0	0	0	2	2	0	2	1
1138	Geotrygon versicolor	Crested quail dove	Europe	Germany	FALSE	2	2	0	0	0	0	0	4	2	2	4	0.5
1139	Geotrygon versicolor	Crested quail dove	Europe	Germany	FALSE	2	1	4	0	0	0	0	7	2	1	3	0.666667
1141	Geotrygon versicolor	Crested quail dove	Europe	Netherlands	FALSE	6	3	1	6	0	0	0	10	6	3	9	0.666667
1142	Geotrygon versicolor	Crested quail dove	Europe	Poland	FALSE	2	2	2	3	0	0	0	6	2	2	4	0.5
1143	Geotrygon versicolor	Crested quail dove	Europe	Switzerland	FALSE	7	4	0	4	0	0	0	11	7	4	11	0.636364
1145	Geotrygon versicolor	Crested quail dove	North America	United States	FALSE	1	0	0	0	0	0	0	1	1	0	1	1
1146	Geotrygon versicolor	Crested quail dove	North America	United States	FALSE	1	1	0	0	0	0	2	4	1	1	2	0.5
1147	Geotrygon versicolor	Crested quail dove	North America	United States	FALSE	3	1	0	0	0	0	0	4	3	1	4	0.75
1148	Geotrygon versicolor	Crested quail dove	North America	United States	FALSE	1	1	0	0	0	0	0	2	1	1	2	0.5
1152	Goura cristata	Blue crowned pigeon	Asia	Hong Kong	FALSE	1	0	0	0	0	0	0	1	1	0	1	1
1154	Goura cristata	Blue crowned pigeon	Asia	Israel	FALSE	1	0	0	0	0	0	0	1	1	0	1	1
1155	Goura cristata	Blue crowned pigeon	Asia	Japan	FALSE	1	0	0	0	0	0	0	1	1	0	1	1
1156	Goura cristata	Blue crowned pigeon	Asia	Japan	FALSE	0	0	0	0	1	1	2	4	1	1	2	0.5
1157	Goura cristata	Blue crowned pigeon	Asia	Singapore	FALSE	7	4	1	0	0	0	0	12	7	4	11	0.636364
1158	Goura cristata	Blue crowned pigeon	Asia	Singapore	FALSE	3	2	6	1	0	0	0	11	3	2	5	0.6
1159	Goura cristata	Blue crowned pigeon	Asia	Taiwan	FALSE	1	4	0	0	0	0	0	5	1	4	5	0.2
1160	Goura cristata	Blue crowned pigeon	Asia	Thailand	FALSE	1	2	3	0	0	0	0	6	1	2	3	0.333333
1161	Goura cristata	Blue crowned pigeon	Asia	United Arab Emirates	FALSE	1	1	3	3	0	0	0	5	1	1	2	0.5
1162	Goura cristata	Blue crowned pigeon	Europe	Czech Republic	FALSE	2	1	0	0	0	0	0	3	2	1	3	0.666667
1163	Goura cristata	Blue crowned pigeon	Europe	France	FALSE	1	0	0	0	0	0	0	1	1	0	1	1
1164	Goura cristata	Blue crowned pigeon	Europe	Germany	FALSE	0	2	0	0	0	0	0	2	0	2	2	0
1165	Goura cristata	Blue crowned pigeon	Europe	Greece	FALSE	1	1	2	0	0	0	0	4	1	1	2	0.5
1166	Goura cristata	Blue crowned pigeon	Europe	Hungary	FALSE	1	1	0	0	0	0	0	2	1	1	2	0.5
1167	Goura cristata	Blue crowned pigeon	Europe	Hungary	FALSE	3	1	0	0	0	0	0	4	3	1	4	0.75
1168	Goura cristata	Blue crowned pigeon	Europe	Netherlands	FALSE	1	1	0	0	0	0	0	2	1	1	2	0.5
1169	Goura cristata	Blue crowned pigeon	Europe	Portugal	FALSE	0	1	0	0	0	0	0	1	0	1	1	0
1171	Goura cristata	Blue crowned pigeon	Europe	Russian Federation	FALSE	1	0	0	0	0	0	0	1	1	0	1	1
1172	Goura cristata	Blue crowned pigeon	Europe	Russian Federation	FALSE	1	1	0	0	0	0	0	2	1	1	2	0.5
1173	Goura cristata	Blue crowned pigeon	Europe	Spain	FALSE	1	1	0	0	0	0	0	2	1	1	2	0.5
1174	Goura cristata	Blue crowned pigeon	Europe	Spain	FALSE	1	1	0	0	0	0	0	2	1	1	2	0.5
1175	Goura cristata	Blue crowned pigeon	Europe	United Kingdom	FALSE	1	0	0	0	0	0	0	1	1	0	1	1
1176	Goura cristata	Blue crowned pigeon	North America	Canada	FALSE	2	2	1	0	0	0	0	5	2	2	4	0.5
1177	Goura cristata	Blue crowned pigeon	North America	United States	FALSE	0	1	0	0	0	0	0	1	0	1	1	0
1178	Goura cristata	Blue crowned pigeon	North America	United States	FALSE	0	2	0	0	0	0	0	2	0	2	2	0
1179	Goura cristata	Blue crowned pigeon	North America	United States	FALSE	1	0	0	0	0	0	0	1	1	0	1	1
1180	Goura cristata	Blue crowned pigeon	North America	United States	FALSE	1	1	0	1	0	0	0	2	1	1	2	0.5
1181	Goura cristata	Blue crowned pigeon	North America	United States	FALSE	1	0	0	0	0	0	0	1	1	0	1	1
1182	Goura cristata	Blue crowned pigeon	North America	United States	FALSE	1	2	0	0	0	0	0	3	1	2	3	0.333333
1183	Goura cristata	Blue crowned pigeon	North America	United States	FALSE	3	0	0	1	0	0	0	3	3	0	3	1
1184	Goura cristata	Blue crowned pigeon	North America	United States	FALSE	1	1	0	0	0	0	0	2	1	1	2	0.5
1185	Goura cristata	Blue crowned pigeon	North America	United States	FALSE	1	0	0	0	0	0	0	1	1	0	1	1
1186	Goura cristata	Blue crowned pigeon	North America	United States	FALSE	0	1	0	0	0	0	0	1	0	1	1	0
1187	Goura cristata	Blue crowned pigeon	North America	United States	FALSE	1	2	0	2	0	0	0	3	1	2	3	0.333333
1188	Goura cristata	Blue crowned pigeon	North America	United States	FALSE	1	0	0	0	0	0	0	1	1	0	1	1
1189	Goura cristata cristata	Blue crowned pigeon	Asia	India	FALSE	0	0	0	0	1	1	0	2	1	1	2	0.5
1190	Goura cristata cristata	Blue crowned pigeon	Europe	France	FALSE	2	0	0	0	0	0	0	2	2	0	2	1
1191	Goura cristata cristata	Blue crowned pigeon	Europe	Portugal	FALSE	1	1	0	0	0	0	0	2	1	1	2	0.5
1192	Goura cristata cristata	Blue crowned pigeon	Europe	Spain	FALSE	1	1	2	1	0	0	0	4	1	1	2	0.5
1193	Goura cristata cristata	Blue crowned pigeon	North America	United States	FALSE	1	0	0	0	0	0	0	1	1	0	1	1
1194	Goura cristata cristata	Blue crowned pigeon	North America	United States	FALSE	1	0	0	0	0	0	0	1	1	0	1	1
1195	Goura cristata minor	Blue crowned pigeon	Europe	Germany	FALSE	1	0	0	0	0	0	0	1	1	0	1	1
1196	Goura cristata minor	Blue crowned pigeon	North America	United States	FALSE	1	1	0	0	0	0	0	2	1	1	2	0.5
1197	Goura cristata minor	Blue crowned pigeon	North America	United States	FALSE	0	1	0	0	0	0	0	1	0	1	1	0
1198	Goura cristata minor	Blue crowned pigeon	North America	United States	FALSE	1	0	0	0	0	0	0	1	1	0	1	1
1199	Goura cristata minor	Blue crowned pigeon	North America	United States	FALSE	0	1	0	0	0	0	0	1	0	1	1	0
1200	Goura cristata minor	Blue crowned pigeon	North America	United States	FALSE	0	1	0	0	0	0	0	1	0	1	1	0
1201	Goura cristata minor	Blue crowned pigeon	North America	United States	FALSE	0	1	0	0	0	0	0	1	0	1	1	0
1202	Goura cristata minor	Blue crowned pigeon	North America	United States	FALSE	0	1	0	0	0	0	0	1	0	1	1	0
1203	Goura scheepmakeri	Scheepmaker's crowned pigeon	Africa	South Africa	FALSE	1	1	0	0	0	0	0	2	1	1	2	0.5
1204	Goura scheepmakeri	Scheepmaker's crowned pigeon	Asia	Cyprus	FALSE	1	1	0	0	0	0	0	2	1	1	2	0.5
1205	Goura scheepmakeri	Scheepmaker's crowned pigeon	Asia	Hong Kong	FALSE	1	2	2	0	0	0	0	5	1	2	3	0.333333
1206	Goura scheepmakeri	Scheepmaker's crowned pigeon	Asia	United Arab Emirates	FALSE	1	0	0	0	0	0	0	1	1	0	1	1
1207	Goura scheepmakeri	Scheepmaker's crowned pigeon	Australia (Oceania)	Papua New Guinea	TRUE	1	7	5	0	0	0	0	13	1	7	8	0.125
1208	Goura scheepmakeri	Scheepmaker's crowned pigeon	Europe	France	FALSE	0	2	0	0	0	0	0	2	0	2	2	0
1209	Goura scheepmakeri	Scheepmaker's crowned pigeon	North America	United States	FALSE	1	1	0	0	0	0	0	2	1	1	2	0.5
1210	Goura victoria	Victoria crowned pigeon	Asia	Cyprus	FALSE	1	0	0	0	0	0	0	1	1	0	1	1
1211	Goura victoria	Victoria crowned pigeon	Asia	Hong Kong	FALSE	1	1	0	0	0	0	0	2	1	1	2	0.5
1212	Goura victoria	Victoria crowned pigeon	Asia	Japan	FALSE	2	1	0	0	0	0	0	3	2	1	3	0.666667
1213	Goura victoria	Victoria crowned pigeon	Asia	Japan	FALSE	0	1	0	0	0	0	0	1	0	1	1	0
1214	Goura victoria	Victoria crowned pigeon	Asia	Japan	FALSE	1	0	0	0	0	0	0	1	1	0	1	1
1215	Goura victoria	Victoria crowned pigeon	Asia	Japan	FALSE	1	0	0	0	0	0	0	1	1	0	1	1
1216	Goura victoria	Victoria crowned pigeon	Asia	Japan	FALSE	9	8	2	2	0	0	0	19	9	8	17	0.529412
1217	Goura victoria	Victoria crowned pigeon	Asia	Singapore	FALSE	7	7	1	1	0	0	0	15	7	7	14	0.5
1218	Goura victoria	Victoria crowned pigeon	Asia	Sri Lanka	FALSE	1	2	0	0	0	0	0	3	1	2	3	0.333333
1219	Goura victoria	Victoria crowned pigeon	Asia	Taiwan	FALSE	3	5	1	1	0	0	0	9	3	5	8	0.375
1221	Goura victoria	Victoria crowned pigeon	Asia	Thailand	FALSE	1	1	15	2	0	0	0	17	1	1	2	0.5
1222	Goura victoria	Victoria crowned pigeon	Asia	Thailand	FALSE	1	0	1	0	0	0	0	2	1	0	1	1
1224	Goura victoria	Victoria crowned pigeon	Asia	United Arab Emirates	FALSE	1	0	1	0	0	0	0	2	1	0	1	1
1225	Goura victoria	Victoria crowned pigeon	Australia (Oceania)	New Caledonia	FALSE	2	1	0	0	0	0	0	3	2	1	3	0.666667
1227	Goura victoria	Victoria crowned pigeon	Europe	Austria	FALSE	2	0	0	0	0	0	0	2	2	0	2	1
1228	Goura victoria	Victoria crowned pigeon	Europe	Croatia	FALSE	1	1	2	2	0	0	0	4	1	1	2	0.5
1229	Goura victoria	Victoria crowned pigeon	Europe	Czech Republic	FALSE	1	1	0	0	0	0	0	2	1	1	2	0.5
1230	Goura victoria	Victoria crowned pigeon	Europe	Denmark	FALSE	1	1	0	0	0	0	0	2	1	1	2	0.5
1231	Goura victoria	Victoria crowned pigeon	Europe	France	FALSE	1	0	0	0	0	0	0	1	1	0	1	1
1232	Goura victoria	Victoria crowned pigeon	Europe	France	FALSE	2	8	0	0	0	0	0	10	2	8	10	0.2
1233	Goura victoria	Victoria crowned pigeon	Europe	France	FALSE	1	1	0	0	0	0	0	2	1	1	2	0.5
1234	Goura victoria	Victoria crowned pigeon	Europe	France	FALSE	2	2	0	1	0	0	0	4	2	2	4	0.5
1235	Goura victoria	Victoria crowned pigeon	Europe	France	FALSE	1	1	0	0	0	0	0	2	1	1	2	0.5
1236	Goura victoria	Victoria crowned pigeon	Europe	France	FALSE	1	3	0	1	0	0	0	4	1	3	4	0.25
1237	Goura victoria	Victoria crowned pigeon	Europe	France	FALSE	1	0	0	0	0	0	0	1	1	0	1	1
1238	Goura victoria	Victoria crowned pigeon	Europe	France	FALSE	1	1	0	0	0	0	0	2	1	1	2	0.5
1239	Goura victoria	Victoria crowned pigeon	Europe	France	FALSE	1	1	0	0	0	0	0	2	1	1	2	0.5
1240	Goura victoria	Victoria crowned pigeon	Europe	France	FALSE	1	1	0	0	0	0	0	2	1	1	2	0.5
1241	Goura victoria	Victoria crowned pigeon	Europe	France	FALSE	2	1	0	0	0	0	0	3	2	1	3	0.666667
1242	Goura victoria	Victoria crowned pigeon	Europe	France	FALSE	0	1	0	0	0	0	0	1	0	1	1	0
1243	Goura victoria	Victoria crowned pigeon	Europe	Germany	FALSE	1	2	1	2	0	0	0	4	1	2	3	0.333333
1244	Goura victoria	Victoria crowned pigeon	Europe	Germany	FALSE	2	1	0	1	0	0	0	3	2	1	3	0.666667
1245	Goura victoria	Victoria crowned pigeon	Europe	Germany	FALSE	2	2	0	2	0	0	0	4	2	2	4	0.5
1246	Goura victoria	Victoria crowned pigeon	Europe	Germany	FALSE	1	1	0	0	0	0	0	2	1	1	2	0.5
1247	Goura victoria	Victoria crowned pigeon	Europe	Germany	FALSE	1	1	0	0	0	0	0	2	1	1	2	0.5
1248	Goura victoria	Victoria crowned pigeon	Europe	Germany	FALSE	1	1	0	0	0	0	0	2	1	1	2	0.5
1249	Goura victoria	Victoria crowned pigeon	Europe	Hungary	FALSE	1	2	0	0	0	0	0	3	1	2	3	0.333333
1250	Goura victoria	Victoria crowned pigeon	Europe	Netherlands	FALSE	2	2	0	1	0	0	0	4	2	2	4	0.5
1251	Goura victoria	Victoria crowned pigeon	Europe	Netherlands	FALSE	1	1	0	0	0	0	0	2	1	1	2	0.5
1252	Goura victoria	Victoria crowned pigeon	Europe	Netherlands	FALSE	2	1	0	1	0	0	0	3	2	1	3	0.666667
1253	Goura victoria	Victoria crowned pigeon	Europe	Netherlands	FALSE	0	1	1	0	0	0	0	2	0	1	1	0
1254	Goura victoria	Victoria crowned pigeon	Europe	Netherlands	FALSE	1	1	0	0	0	0	0	2	1	1	2	0.5
1255	Goura victoria	Victoria crowned pigeon	Europe	Netherlands	FALSE	1	1	0	0	0	0	0	2	1	1	2	0.5
1256	Goura victoria	Victoria crowned pigeon	Europe	Netherlands	FALSE	0	1	0	0	0	0	0	1	0	1	1	0
1257	Goura victoria	Victoria crowned pigeon	Europe	Poland	FALSE	2	1	0	1	0	0	0	3	2	1	3	0.666667
1258	Goura victoria	Victoria crowned pigeon	Europe	Poland	FALSE	2	2	0	0	0	0	0	4	2	2	4	0.5
1259	Goura victoria	Victoria crowned pigeon	Europe	Poland	FALSE	1	0	0	0	0	0	0	1	1	0	1	1
1260	Goura victoria	Victoria crowned pigeon	Europe	Poland	FALSE	2	1	0	0	0	0	0	3	2	1	3	0.666667
1261	Goura victoria	Victoria crowned pigeon	Europe	Poland	FALSE	1	1	0	0	0	0	0	2	1	1	2	0.5
1262	Goura victoria	Victoria crowned pigeon	Europe	Poland	FALSE	1	1	0	0	0	0	0	2	1	1	2	0.5
1263	Goura victoria	Victoria crowned pigeon	Europe	Poland	FALSE	1	1	0	0	0	0	0	2	1	1	2	0.5
1264	Goura victoria	Victoria crowned pigeon	Europe	Poland	FALSE	1	1	0	0	0	0	0	2	1	1	2	0.5
1265	Goura victoria	Victoria crowned pigeon	Europe	Poland	FALSE	1	1	0	0	0	0	0	2	1	1	2	0.5
1266	Goura victoria	Victoria crowned pigeon	Europe	Poland	FALSE	1	1	0	0	0	0	0	2	1	1	2	0.5
1267	Goura victoria	Victoria crowned pigeon	Europe	Portugal	FALSE	2	2	0	0	0	0	0	4	2	2	4	0.5
1268	Goura victoria	Victoria crowned pigeon	Europe	Portugal	FALSE	1	3	0	1	0	0	0	4	1	3	4	0.25
1269	Goura victoria	Victoria crowned pigeon	Europe	Portugal	FALSE	1	1	0	0	0	0	0	2	1	1	2	0.5
1270	Goura victoria	Victoria crowned pigeon	Europe	Russian Federation	FALSE	1	1	0	0	0	0	0	2	1	1	2	0.5
1272	Goura victoria	Victoria crowned pigeon	Europe	Slovakia	FALSE	1	1	0	0	0	0	0	2	1	1	2	0.5
1273	Goura victoria	Victoria crowned pigeon	Europe	Spain	FALSE	1	1	1	1	0	0	0	3	1	1	2	0.5
1274	Goura victoria	Victoria crowned pigeon	Europe	Spain	FALSE	1	2	0	0	0	0	0	3	1	2	3	0.333333
1275	Goura victoria	Victoria crowned pigeon	Europe	Switzerland	FALSE	2	1	2	2	0	0	0	5	2	1	3	0.666667
1276	Goura victoria	Victoria crowned pigeon	Europe	United Kingdom	FALSE	0	1	0	0	0	0	0	1	0	1	1	0
1277	Goura victoria	Victoria crowned pigeon	Europe	United Kingdom	FALSE	3	3	0	0	0	0	0	6	3	3	6	0.5
1278	Goura victoria	Victoria crowned pigeon	Europe	United Kingdom	FALSE	2	2	0	0	0	0	0	4	2	2	4	0.5
1279	Goura victoria	Victoria crowned pigeon	Europe	United Kingdom	FALSE	2	1	0	0	0	0	0	3	2	1	3	0.666667
1280	Goura victoria	Victoria crowned pigeon	Europe	United Kingdom	FALSE	1	1	0	0	0	0	0	2	1	1	2	0.5
1281	Goura victoria	Victoria crowned pigeon	Europe	United Kingdom	FALSE	1	0	0	0	0	0	0	1	1	0	1	1
1282	Goura victoria	Victoria crowned pigeon	Europe	United Kingdom	FALSE	1	2	0	0	0	0	0	3	1	2	3	0.333333
1283	Goura victoria	Victoria crowned pigeon	Europe	United Kingdom	FALSE	2	3	0	1	0	0	0	5	2	3	5	0.4
1284	Goura victoria	Victoria crowned pigeon	Europe	United Kingdom	FALSE	1	1	0	0	0	0	0	2	1	1	2	0.5
1285	Goura victoria	Victoria crowned pigeon	Europe	United Kingdom	FALSE	2	2	0	1	0	0	0	4	2	2	4	0.5
1286	Goura victoria	Victoria crowned pigeon	Europe	United Kingdom	FALSE	0	1	0	0	0	0	0	1	0	1	1	0
1287	Goura victoria	Victoria crowned pigeon	Europe	United Kingdom	FALSE	1	0	1	1	0	0	0	2	1	0	1	1
1288	Goura victoria	Victoria crowned pigeon	Europe	United Kingdom	FALSE	1	2	0	0	0	0	0	3	1	2	3	0.333333
1289	Goura victoria	Victoria crowned pigeon	North America	Canada	FALSE	2	2	0	0	0	0	0	4	2	2	4	0.5
1290	Goura victoria	Victoria crowned pigeon	North America	United States	FALSE	1	1	0	0	0	0	0	2	1	1	2	0.5
1291	Goura victoria	Victoria crowned pigeon	North America	United States	FALSE	2	1	0	0	0	0	0	3	2	1	3	0.666667
1292	Goura victoria	Victoria crowned pigeon	North America	United States	FALSE	1	1	0	0	0	0	0	2	1	1	2	0.5
1293	Goura victoria	Victoria crowned pigeon	North America	United States	FALSE	1	3	0	0	0	0	0	4	1	3	4	0.25
1294	Goura victoria	Victoria crowned pigeon	North America	United States	FALSE	1	2	0	0	0	0	0	3	1	2	3	0.333333
1295	Goura victoria	Victoria crowned pigeon	North America	United States	FALSE	1	1	0	0	0	0	0	2	1	1	2	0.5
1296	Goura victoria	Victoria crowned pigeon	North America	United States	FALSE	1	1	0	0	0	0	0	2	1	1	2	0.5
1297	Goura victoria	Victoria crowned pigeon	North America	United States	FALSE	1	1	0	0	0	0	0	2	1	1	2	0.5
1298	Goura victoria	Victoria crowned pigeon	North America	United States	FALSE	1	1	0	0	0	0	0	2	1	1	2	0.5
1299	Goura victoria	Victoria crowned pigeon	North America	United States	FALSE	1	0	0	0	0	0	0	1	1	0	1	1
1300	Goura victoria	Victoria crowned pigeon	North America	United States	FALSE	1	1	0	0	0	0	0	2	1	1	2	0.5
1301	Goura victoria	Victoria crowned pigeon	North America	United States	FALSE	2	0	0	0	0	0	0	2	2	0	2	1
1302	Goura victoria	Victoria crowned pigeon	North America	United States	FALSE	2	2	1	0	0	0	0	5	2	2	4	0.5
1303	Goura victoria	Victoria crowned pigeon	North America	United States	FALSE	2	2	0	0	0	0	0	4	2	2	4	0.5
1304	Goura victoria	Victoria crowned pigeon	North America	United States	FALSE	1	1	0	0	0	0	0	2	1	1	2	0.5
1305	Goura victoria	Victoria crowned pigeon	North America	United States	FALSE	2	1	0	0	0	1	0	4	2	2	4	0.5
1306	Goura victoria	Victoria crowned pigeon	North America	United States	FALSE	3	1	0	0	0	0	0	4	3	1	4	0.75
1307	Goura victoria	Victoria crowned pigeon	North America	United States	FALSE	1	0	0	0	0	0	0	1	1	0	1	1
1308	Goura victoria	Victoria crowned pigeon	North America	United States	FALSE	2	3	0	1	0	0	0	5	2	3	5	0.4
1309	Goura victoria	Victoria crowned pigeon	North America	United States	FALSE	1	1	1	1	0	0	0	3	1	1	2	0.5
1310	Goura victoria	Victoria crowned pigeon	North America	United States	FALSE	1	1	0	0	0	0	0	2	1	1	2	0.5
1311	Goura victoria	Victoria crowned pigeon	North America	United States	FALSE	2	5	0	1	0	0	0	7	2	5	7	0.285714
1312	Goura victoria	Victoria crowned pigeon	North America	United States	FALSE	1	1	0	0	0	0	0	2	1	1	2	0.5
1313	Goura victoria	Victoria crowned pigeon	North America	United States	FALSE	5	1	0	0	0	0	0	6	5	1	6	0.833333
1314	Goura victoria	Victoria crowned pigeon	North America	United States	FALSE	1	1	0	0	0	0	0	2	1	1	2	0.5
1315	Goura victoria	Victoria crowned pigeon	North America	United States	FALSE	1	1	0	0	0	0	0	2	1	1	2	0.5
1316	Goura victoria	Victoria crowned pigeon	North America	United States	FALSE	1	1	0	0	0	0	0	2	1	1	2	0.5
1317	Goura victoria	Victoria crowned pigeon	North America	United States	FALSE	2	1	0	1	0	0	0	3	2	1	3	0.666667
1318	Goura victoria	Victoria crowned pigeon	North America	United States	FALSE	1	0	0	0	0	0	0	1	1	0	1	1
1319	Goura victoria	Victoria crowned pigeon	North America	United States	FALSE	1	1	1	1	0	0	0	3	1	1	2	0.5
1320	Goura victoria	Victoria crowned pigeon	North America	United States	FALSE	1	1	0	0	0	0	0	2	1	1	2	0.5
1321	Goura victoria	Victoria crowned pigeon	North America	United States	FALSE	2	3	0	0	0	0	0	5	2	3	5	0.4
1322	Goura victoria	Victoria crowned pigeon	North America	United States	FALSE	2	2	0	0	0	0	0	4	2	2	4	0.5
1323	Goura victoria	Victoria crowned pigeon	North America	United States	FALSE	2	3	1	1	0	0	0	6	2	3	5	0.4
1324	Goura victoria	Victoria crowned pigeon	North America	United States	FALSE	1	1	0	0	0	0	0	2	1	1	2	0.5
1325	Goura victoria	Victoria crowned pigeon	North America	United States	FALSE	1	1	0	0	0	0	0	2	1	1	2	0.5
1326	Goura victoria	Victoria crowned pigeon	North America	United States	FALSE	1	1	0	0	0	0	0	2	1	1	2	0.5
1327	Goura victoria	Victoria crowned pigeon	North America	United States	FALSE	2	3	0	0	0	0	0	5	2	3	5	0.4
1328	Goura victoria	Victoria crowned pigeon	North America	United States	FALSE	1	1	0	0	0	0	0	2	1	1	2	0.5
1329	Goura victoria victoria	Victoria crowned pigeon	Europe	France	FALSE	1	0	0	0	0	0	0	1	1	0	1	1
1330	Goura victoria victoria	Victoria crowned pigeon	Europe	Hungary	FALSE	2	0	0	0	0	0	0	2	2	0	2	1
1331	Goura victoria victoria	Victoria crowned pigeon	Europe	Netherlands	FALSE	0	1	0	0	0	0	0	1	0	1	1	0
1332	Goura victoria victoria	Victoria crowned pigeon	Europe	Netherlands	FALSE	1	1	1	1	0	0	0	3	1	1	2	0.5
1333	Goura victoria victoria	Victoria crowned pigeon	Europe	United Kingdom	FALSE	1	0	0	0	0	0	0	1	1	0	1	1
1334	Goura victoria victoria	Victoria crowned pigeon	Europe	United Kingdom	FALSE	0	1	0	0	0	0	0	1	0	1	1	0
1335	Goura victoria victoria	Victoria crowned pigeon	Europe	United Kingdom	FALSE	1	0	0	0	0	0	0	1	1	0	1	1
1336	Goura victoria victoria	Victoria crowned pigeon	Europe	United Kingdom	FALSE	0	1	0	0	0	0	0	1	0	1	1	0
1337	Goura victoria beccarii	Victoria crowned pigeon	Asia	Japan	FALSE	1	0	0	0	0	0	0	1	1	0	1	1
1338	Goura victoria beccarii	Victoria crowned pigeon	Europe	Germany	FALSE	0	2	2	2	0	0	0	4	0	2	2	0
1339	Goura sclaterii	Sclater's crowned-pigeon	Asia	Israel	FALSE	1	0	0	0	0	0	0	1	1	0	1	1
1340	Goura sclaterii	Sclater's crowned-pigeon	Asia	Israel	FALSE	1	1	0	0	0	0	0	2	1	1	2	0.5
1341	Goura sclaterii	Sclater's crowned-pigeon	Asia	Singapore	FALSE	16	9	5	3	0	0	0	30	16	9	25	0.64
1343	Goura sclaterii	Sclater's crowned-pigeon	Europe	Belgium	FALSE	3	3	11	0	0	0	0	17	3	3	6	0.5
1344	Goura sclaterii	Sclater's crowned-pigeon	Europe	Belgium	FALSE	1	1	0	0	0	0	0	2	1	1	2	0.5
1345	Goura sclaterii	Sclater's crowned-pigeon	Europe	Czech Republic	FALSE	1	1	0	0	0	0	0	2	1	1	2	0.5
1346	Goura sclaterii	Sclater's crowned-pigeon	Europe	Czech Republic	FALSE	1	1	0	0	0	0	0	2	1	1	2	0.5
1347	Goura sclaterii	Sclater's crowned-pigeon	Europe	Czech Republic	FALSE	2	2	0	0	0	0	0	4	2	2	4	0.5
1348	Goura sclaterii	Sclater's crowned-pigeon	Europe	Czech Republic	FALSE	1	1	0	0	0	0	0	2	1	1	2	0.5
1349	Goura sclaterii	Sclater's crowned-pigeon	Europe	Denmark	FALSE	1	1	2	2	0	0	0	4	1	1	2	0.5
1350	Goura sclaterii	Sclater's crowned-pigeon	Europe	Denmark	FALSE	0	2	0	0	0	0	0	2	0	2	2	0
1351	Goura sclaterii	Sclater's crowned-pigeon	Europe	France	FALSE	1	1	0	0	0	0	0	2	1	1	2	0.5
1352	Goura sclaterii	Sclater's crowned-pigeon	Europe	France	FALSE	3	2	2	2	0	0	0	7	3	2	5	0.6
1353	Goura sclaterii	Sclater's crowned-pigeon	Europe	France	FALSE	1	0	0	0	0	0	0	1	1	0	1	1
1354	Goura sclaterii	Sclater's crowned-pigeon	Europe	France	FALSE	1	1	3	1	0	0	0	5	1	1	2	0.5
1355	Goura sclaterii	Sclater's crowned-pigeon	Europe	France	FALSE	4	2	0	0	0	0	0	6	4	2	6	0.666667
1356	Goura sclaterii	Sclater's crowned-pigeon	Europe	France	FALSE	1	1	0	0	0	0	0	2	1	1	2	0.5
1357	Goura sclaterii	Sclater's crowned-pigeon	Europe	France	FALSE	1	1	0	0	0	0	0	2	1	1	2	0.5
1358	Goura sclaterii	Sclater's crowned-pigeon	Europe	France	FALSE	1	1	0	0	0	0	0	2	1	1	2	0.5
1359	Goura sclaterii	Sclater's crowned-pigeon	Europe	Germany	FALSE	1	1	0	0	0	0	0	2	1	1	2	0.5
1360	Goura sclaterii	Sclater's crowned-pigeon	Europe	Germany	FALSE	1	1	0	0	0	0	0	2	1	1	2	0.5
1361	Goura sclaterii	Sclater's crowned-pigeon	Europe	Germany	FALSE	1	1	0	0	0	0	0	2	1	1	2	0.5
1362	Goura sclaterii	Sclater's crowned-pigeon	Europe	Germany	FALSE	1	1	0	0	0	0	0	2	1	1	2	0.5
1363	Goura sclaterii	Sclater's crowned-pigeon	Europe	Germany	FALSE	1	1	0	0	0	0	0	2	1	1	2	0.5
1364	Goura sclaterii	Sclater's crowned-pigeon	Europe	Germany	FALSE	3	1	0	0	0	0	0	4	3	1	4	0.75
1365	Goura sclaterii	Sclater's crowned-pigeon	Europe	Germany	FALSE	1	1	0	0	0	0	0	2	1	1	2	0.5
1366	Goura sclaterii	Sclater's crowned-pigeon	Europe	Netherlands	FALSE	1	2	0	1	0	0	0	3	1	2	3	0.333333
1367	Goura sclaterii	Sclater's crowned-pigeon	Europe	Norway	FALSE	2	1	0	0	0	0	0	3	2	1	3	0.666667
1368	Goura sclaterii	Sclater's crowned-pigeon	Europe	Portugal	FALSE	0	1	0	0	0	0	0	1	0	1	1	0
1369	Goura sclaterii	Sclater's crowned-pigeon	Europe	United Kingdom	FALSE	1	1	0	0	0	0	0	2	1	1	2	0.5
1370	Goura sclaterii	Sclater's crowned-pigeon	Europe	United Kingdom	FALSE	1	4	1	2	0	0	0	6	1	4	5	0.2
1371	Goura sclaterii	Sclater's crowned-pigeon	Europe	United Kingdom	FALSE	1	1	0	0	0	0	0	2	1	1	2	0.5
1372	Goura sclaterii	Sclater's crowned-pigeon	Europe	United Kingdom	FALSE	2	2	1	1	0	0	0	5	2	2	4	0.5
1374	Gymnophaps albertisii	Mountain pigeon	Australia (Oceania)	Papua New Guinea	TRUE	2	3	4	0	0	0	0	9	2	3	5	0.4
1375	Gymnophaps albertisii	Mountain pigeon	Europe	Germany	FALSE	2	3	0	0	0	0	0	5	2	3	5	0.4
1376	Gymnophaps albertisii	Mountain pigeon	Europe	Germany	FALSE	1	0	0	0	0	0	0	1	1	0	1	1
1377	Gymnophaps albertisii	Mountain pigeon	North America	United States	FALSE	3	0	0	0	0	0	0	3	3	0	3	1
1378	Gymnophaps albertisii	Mountain pigeon	North America	United States	FALSE	3	2	0	0	0	0	0	5	3	2	5	0.6
1379	Hemiphaga novaeseelandiae	New Zealand pigeon	Australia (Oceania)	New Zealand	TRUE	0	3	0	0	0	0	0	3	0	3	3	0
1380	Hemiphaga novaeseelandiae	New Zealand pigeon	Australia (Oceania)	New Zealand	TRUE	1	1	1	0	0	0	0	3	1	1	2	0.5
1381	Hemiphaga novaeseelandiae	New Zealand pigeon	Australia (Oceania)	New Zealand	TRUE	0	1	0	0	0	0	0	1	0	1	1	0
1382	Hemiphaga novaeseelandiae	New Zealand pigeon	Australia (Oceania)	New Zealand	TRUE	2	1	1	1	0	0	0	4	2	1	3	0.666667
1383	Hemiphaga novaeseelandiae	New Zealand pigeon	Australia (Oceania)	New Zealand	TRUE	1	2	5	0	0	0	0	8	1	2	3	0.333333
1384	Hemiphaga novaeseelandiae novaeseelandiae	New Zealand pigeon	Australia (Oceania)	New Zealand	TRUE	0	1	0	0	0	0	0	1	0	1	1	0
1385	Hemiphaga novaeseelandiae novaeseelandiae	New Zealand pigeon	Australia (Oceania)	New Zealand	TRUE	5	0	1	0	0	0	0	6	5	0	5	1
1386	Hemiphaga novaeseelandiae novaeseelandiae	New Zealand pigeon	Australia (Oceania)	New Zealand	TRUE	1	0	0	0	0	0	0	1	1	0	1	1
1387	Hemiphaga novaeseelandiae novaeseelandiae	New Zealand pigeon	Australia (Oceania)	New Zealand	TRUE	1	0	0	0	0	0	0	1	1	0	1	1
1388	Hemiphaga novaeseelandiae novaeseelandiae	New Zealand pigeon	Australia (Oceania)	New Zealand	TRUE	1	0	0	0	0	0	0	1	1	0	1	1
1390	Henicophaps albifrons	White-capped ground pigeon	Europe	Czech Republic	FALSE	2	1	0	0	0	0	0	3	2	1	3	0.666667
1391	Leptotila plumbeiceps	Grey-headed dove	Europe	Czech Republic	FALSE	1	1	3	0	0	0	0	5	1	1	2	0.5
1394	Columbina cruziana	Croaking ground dove	Europe	Germany	FALSE	4	2	4	0	0	0	0	10	4	2	6	0.666667
1395	Columbina cruziana	Croaking ground dove	Europe	Germany	FALSE	1	1	0	0	0	0	0	2	1	1	2	0.5
1396	Columbina cruziana	Croaking ground dove	Europe	Spain	FALSE	1	2	0	0	0	0	0	3	1	2	3	0.333333
1397	Columbina cruziana	Croaking ground dove	North America	United States	FALSE	1	0	0	0	0	0	0	1	1	0	1	1
1398	Columbina cruziana	Croaking ground dove	North America	United States	FALSE	1	0	0	0	0	0	0	1	1	0	1	1
1399	Columbina cruziana	Croaking ground dove	North America	United States	FALSE	3	0	0	0	0	0	0	3	3	0	3	1
1403	Columbina passerina passerina	Ground dove	North America	Cayman Islands	TRUE	0	3	2	0	0	0	2	7	0	3	3	0
1404	Columbina talpacoti	Ruddy ground dove	Australia (Oceania)	Australia	FALSE	0	0	0	0	0	1	1	2	0	1	1	0
1405	Columbina talpacoti	Ruddy ground dove	Europe	Czech Republic	FALSE	1	1	0	0	0	0	0	2	1	1	2	0.5
1406	Columbina talpacoti	Ruddy ground dove	Europe	Netherlands	FALSE	2	2	0	0	0	0	0	4	2	2	4	0.5
1409	Columbina talpacoti	Ruddy ground dove	North America	United States	FALSE	2	1	0	0	0	0	0	3	2	1	3	0.666667
1410	Columbina talpacoti	Ruddy ground dove	South America	Brazil	TRUE	2	0	1	1	0	0	0	3	2	0	2	1
1411	Leucosarcia	Wonga pigeon	Australia (Oceania)	Australia	TRUE	0	1	5	0	0	0	0	6	0	1	1	0
1412	Leucosarcia	Wonga pigeon	Australia (Oceania)	Australia	TRUE	0	2	0	0	0	0	0	2	0	2	2	0
1414	Leucosarcia melanoleuca	Wonga pigeon	Asia	Hong Kong	FALSE	1	0	0	0	0	0	0	1	1	0	1	1
1415	Leucosarcia melanoleuca	Wonga pigeon	Asia	Singapore	FALSE	0	1	0	0	0	0	0	1	0	1	1	0
1416	Leucosarcia melanoleuca	Wonga pigeon	Asia	Singapore	FALSE	2	2	0	0	0	0	0	4	2	2	4	0.5
1417	Leucosarcia melanoleuca	Wonga pigeon	Australia (Oceania)	Australia	FALSE	3	3	24	0	0	0	0	30	3	3	6	0.5
1418	Leucosarcia melanoleuca	Wonga pigeon	Australia (Oceania)	Australia	TRUE	1	0	1	0	0	0	0	2	1	0	1	1
1419	Leucosarcia melanoleuca	Wonga pigeon	Australia (Oceania)	Australia	TRUE	3	0	3	0	0	0	0	6	3	0	3	1
1420	Leucosarcia melanoleuca	Wonga pigeon	Australia (Oceania)	Australia	TRUE	2	2	1	0	0	0	0	5	2	2	4	0.5
1422	Leucosarcia melanoleuca	Wonga pigeon	Australia (Oceania)	Australia	TRUE	6	21	2	0	0	0	0	29	6	21	27	0.222222
1424	Leucosarcia melanoleuca	Wonga pigeon	Australia (Oceania)	Australia	TRUE	2	2	8	0	0	0	0	12	2	2	4	0.5
1425	Leucosarcia melanoleuca	Wonga pigeon	Australia (Oceania)	Australia	TRUE	0	1	0	0	0	0	0	1	0	1	1	0
1426	Leucosarcia melanoleuca	Wonga pigeon	Australia (Oceania)	Australia	FALSE	0	1	3	0	0	0	0	4	0	1	1	0
1427	Leucosarcia melanoleuca	Wonga pigeon	Australia (Oceania)	Australia	FALSE	0	0	0	0	1	1	0	2	1	1	2	0.5
1428	Leucosarcia melanoleuca	Wonga pigeon	Australia (Oceania)	Australia	TRUE	1	0	0	0	0	0	0	1	1	0	1	1
1429	Leucosarcia melanoleuca	Wonga pigeon	Australia (Oceania)	Australia	TRUE	4	0	0	0	0	0	0	4	4	0	4	1
1430	Leucosarcia melanoleuca	Wonga pigeon	Europe	Belgium	FALSE	2	0	0	1	0	0	0	2	2	0	2	1
1431	Leucosarcia melanoleuca	Wonga pigeon	Europe	Czech Republic	FALSE	1	1	0	0	0	0	0	2	1	1	2	0.5
1432	Leucosarcia melanoleuca	Wonga pigeon	Europe	Czech Republic	FALSE	1	1	0	0	0	0	0	2	1	1	2	0.5
1433	Leucosarcia melanoleuca	Wonga pigeon	Europe	Czech Republic	FALSE	0	1	0	0	0	0	0	1	0	1	1	0
1434	Leucosarcia melanoleuca	Wonga pigeon	Europe	Czech Republic	FALSE	1	1	1	0	0	0	0	3	1	1	2	0.5
1435	Leucosarcia melanoleuca	Wonga pigeon	Europe	France	FALSE	0	1	0	0	0	0	0	1	0	1	1	0
1436	Leucosarcia melanoleuca	Wonga pigeon	Europe	Germany	FALSE	1	1	0	0	0	0	0	2	1	1	2	0.5
1437	Leucosarcia melanoleuca	Wonga pigeon	Europe	Germany	FALSE	1	0	0	0	0	0	0	1	1	0	1	1
1438	Leucosarcia melanoleuca	Wonga pigeon	Europe	Germany	FALSE	1	1	0	0	0	0	0	2	1	1	2	0.5
1439	Leucosarcia melanoleuca	Wonga pigeon	Europe	Germany	FALSE	1	0	0	0	0	0	0	1	1	0	1	1
1440	Leucosarcia melanoleuca	Wonga pigeon	Europe	Germany	FALSE	1	1	0	0	0	0	0	2	1	1	2	0.5
1441	Leucosarcia melanoleuca	Wonga pigeon	Europe	Germany	FALSE	2	3	0	0	0	0	0	5	2	3	5	0.4
1442	Leucosarcia melanoleuca	Wonga pigeon	Europe	United Kingdom	FALSE	4	2	0	0	0	0	0	6	4	2	6	0.666667
1443	Leucosarcia melanoleuca	Wonga pigeon	Europe	United Kingdom	FALSE	2	3	0	0	0	0	0	5	2	3	5	0.4
1444	Leucosarcia melanoleuca	Wonga pigeon	Europe	United Kingdom	FALSE	2	0	0	0	0	0	0	2	2	0	2	1
1445	Leucosarcia melanoleuca	Wonga pigeon	Europe	United Kingdom	FALSE	1	0	0	0	0	0	0	1	1	0	1	1
1446	Leucosarcia melanoleuca	Wonga pigeon	Europe	United Kingdom	FALSE	2	1	0	0	0	0	0	3	2	1	3	0.666667
1447	Leucosarcia melanoleuca	Wonga pigeon	North America	United States	FALSE	5	3	0	5	0	0	0	8	5	3	8	0.625
1448	Leucosarcia melanoleuca	Wonga pigeon	North America	United States	FALSE	2	0	0	0	0	0	0	2	2	0	2	1
1449	Leucosarcia melanoleuca	Wonga pigeon	North America	United States	FALSE	1	1	0	0	0	0	0	2	1	1	2	0.5
1450	Leucosarcia melanoleuca	Wonga pigeon	North America	United States	FALSE	3	2	0	0	0	0	0	5	3	2	5	0.6
1452	Lopholaimus antarcticus	Topknot pigeon	Australia (Oceania)	Australia	TRUE	2	3	0	0	0	0	0	5	2	3	5	0.4
1453	Lopholaimus antarcticus	Topknot pigeon	Australia (Oceania)	Australia	TRUE	7	8	1	1	0	0	0	16	7	8	15	0.466667
1454	Lopholaimus antarcticus	Topknot pigeon	Australia (Oceania)	Australia	TRUE	1	0	1	0	0	0	0	2	1	0	1	1
1455	Lopholaimus antarcticus	Topknot pigeon	Australia (Oceania)	Australia	TRUE	6	0	0	0	0	0	0	6	6	0	6	1
1456	Lopholaimus antarcticus	Topknot pigeon	Australia (Oceania)	Australia	TRUE	6	17	6	0	0	0	0	29	6	17	23	0.26087
1457	Macropygia amboinensis	Pink-breasted cuckoo dove	Australia (Oceania)	Australia	FALSE	1	2	0	0	0	0	0	3	1	2	3	0.333333
1459	Macropygia emiliana	Ruddy cuckoo-dove	Asia	Hong Kong	FALSE	0	3	1	0	0	0	0	4	0	3	3	0
1460	Macropygia phasianella	Slender-bill cuckoo-dove	Australia (Oceania)	Australia	FALSE	1	0	0	0	0	0	0	1	1	0	1	1
1461	Macropygia phasianella	Slender-bill cuckoo-dove	Australia (Oceania)	Australia	TRUE	6	1	0	0	0	0	0	7	6	1	7	0.857143
1462	Macropygia phasianella	Slender-bill cuckoo-dove	Australia (Oceania)	Australia	TRUE	3	2	1	1	0	0	0	6	3	2	5	0.6
1463	Macropygia phasianella	Slender-bill cuckoo-dove	Australia (Oceania)	Australia	TRUE	11	8	2	0	0	0	0	21	11	8	19	0.578947
1464	Macropygia phasianella	Slender-bill cuckoo-dove	Australia (Oceania)	Australia	TRUE	0	1	4	0	0	0	0	5	0	1	1	0
1465	Macropygia unchall	Bar-tailed cuckoo-dove	Asia	Singapore	FALSE	5	6	1	2	0	0	0	12	5	6	11	0.454545
1466	Macropygia unchall	Bar-tailed cuckoo-dove	Europe	Czech Republic	FALSE	2	0	0	0	0	0	0	2	2	0	2	1
1467	Macropygia unchall	Bar-tailed cuckoo-dove	Europe	Germany	FALSE	1	0	0	0	0	0	0	1	1	0	1	1
1468	Macropygia unchall	Bar-tailed cuckoo-dove	Europe	Germany	FALSE	1	0	0	0	0	0	0	1	1	0	1	1
1469	Metriopelia ceciliae	Bare-faced ground dove	Africa	South Africa	FALSE	0	0	1	0	1	1	0	3	1	1	2	0.5
1474	Ocyphaps lophotes	Crested pigeon	Asia	Cyprus	FALSE	2	2	0	0	0	0	0	4	2	2	4	0.5
1475	Ocyphaps lophotes	Crested pigeon	Asia	Hong Kong	FALSE	3	4	7	0	0	0	0	14	3	4	7	0.428571
1476	Ocyphaps lophotes	Crested pigeon	Asia	Hong Kong	FALSE	4	5	30	0	0	0	0	39	4	5	9	0.444444
1477	Ocyphaps lophotes	Crested pigeon	Asia	Israel	FALSE	0	1	2	0	0	0	0	3	0	1	1	0
1478	Ocyphaps lophotes	Crested pigeon	Asia	Israel	FALSE	1	1	3	3	0	0	0	5	1	1	2	0.5
1479	Ocyphaps lophotes	Crested pigeon	Asia	Israel	FALSE	0	1	2	0	0	0	0	3	0	1	1	0
1481	Ocyphaps lophotes	Crested pigeon	Asia	Singapore	FALSE	15	7	4	3	0	0	0	26	15	7	22	0.681818
1482	Ocyphaps lophotes	Crested pigeon	Asia	Taiwan	FALSE	4	0	0	0	0	0	0	4	4	0	4	1
1483	Ocyphaps lophotes	Crested pigeon	Asia	United Arab Emirates	FALSE	1	0	0	0	0	0	0	1	1	0	1	1
1484	Ocyphaps lophotes	Crested pigeon	Australia (Oceania)	Australia	TRUE	5	6	0	0	0	0	0	11	5	6	11	0.454545
1487	Ocyphaps lophotes	Crested pigeon	Australia (Oceania)	Australia	FALSE	0	0	0	0	1	1	0	2	1	1	2	0.5
1491	Ocyphaps lophotes	Crested pigeon	Australia (Oceania)	New Zealand	FALSE	5	3	0	0	0	0	0	8	5	3	8	0.625
1492	Ocyphaps lophotes	Crested pigeon	Europe	Austria	FALSE	2	0	0	0	0	0	0	2	2	0	2	1
1495	Ocyphaps lophotes	Crested pigeon	Europe	Czech Republic	FALSE	0	0	0	0	2	2	5	9	2	2	4	0.5
1497	Ocyphaps lophotes	Crested pigeon	Europe	Czech Republic	FALSE	2	2	0	0	0	0	0	4	2	2	4	0.5
1498	Ocyphaps lophotes	Crested pigeon	Europe	Czech Republic	FALSE	3	2	6	6	0	0	0	11	3	2	5	0.6
1499	Ocyphaps lophotes	Crested pigeon	Europe	Czech Republic	FALSE	1	0	0	0	0	2	1	4	1	2	3	0.333333
1500	Ocyphaps lophotes	Crested pigeon	Europe	Denmark	FALSE	2	2	0	0	0	0	0	4	2	2	4	0.5
1501	Ocyphaps lophotes	Crested pigeon	Europe	Denmark	FALSE	1	1	0	0	0	0	0	2	1	1	2	0.5
1504	Ocyphaps lophotes	Crested pigeon	Europe	France	FALSE	2	0	3	0	0	0	0	5	2	0	2	1
1505	Ocyphaps lophotes	Crested pigeon	Europe	France	FALSE	0	3	0	0	0	0	0	3	0	3	3	0
1506	Ocyphaps lophotes	Crested pigeon	Europe	Germany	FALSE	1	0	0	0	0	0	0	1	1	0	1	1
1507	Ocyphaps lophotes	Crested pigeon	Europe	Germany	FALSE	7	10	4	13	0	0	0	21	7	10	17	0.411765
1509	Ocyphaps lophotes	Crested pigeon	Europe	Germany	FALSE	1	1	0	0	0	0	0	2	1	1	2	0.5
1510	Ocyphaps lophotes	Crested pigeon	Europe	Germany	FALSE	0	1	4	1	0	0	0	5	0	1	1	0
1511	Ocyphaps lophotes	Crested pigeon	Europe	Germany	FALSE	0	4	0	0	0	0	0	4	0	4	4	0
1512	Ocyphaps lophotes	Crested pigeon	Europe	Germany	FALSE	4	6	4	0	0	0	0	14	4	6	10	0.4
1513	Ocyphaps lophotes	Crested pigeon	Europe	Germany	FALSE	2	2	0	0	0	0	0	4	2	2	4	0.5
1514	Ocyphaps lophotes	Crested pigeon	Europe	Germany	FALSE	0	0	0	0	1	1	8	10	1	1	2	0.5
1515	Ocyphaps lophotes	Crested pigeon	Europe	Germany	FALSE	5	4	1	0	0	0	0	10	5	4	9	0.555556
1516	Ocyphaps lophotes	Crested pigeon	Europe	Greece	FALSE	0	0	0	0	4	4	4	12	4	4	8	0.5
1518	Ocyphaps lophotes	Crested pigeon	Europe	Hungary	FALSE	0	0	0	0	2	2	0	4	2	2	4	0.5
1519	Ocyphaps lophotes	Crested pigeon	Europe	Isle Of Man	FALSE	2	2	7	0	0	0	0	11	2	2	4	0.5
1520	Ocyphaps lophotes	Crested pigeon	Europe	Netherlands	FALSE	1	1	2	0	0	0	0	4	1	1	2	0.5
1523	Ocyphaps lophotes	Crested pigeon	Europe	Netherlands	FALSE	2	1	0	0	0	0	0	3	2	1	3	0.666667
1524	Ocyphaps lophotes	Crested pigeon	Europe	Russian Federation	FALSE	1	0	0	0	0	0	0	1	1	0	1	1
1525	Ocyphaps lophotes	Crested pigeon	Europe	Russian Federation	FALSE	2	2	0	0	0	0	0	4	2	2	4	0.5
1526	Ocyphaps lophotes	Crested pigeon	Europe	Russian Federation	FALSE	0	1	0	0	0	0	0	1	0	1	1	0
1527	Ocyphaps lophotes	Crested pigeon	Europe	Russian Federation	FALSE	2	2	0	0	0	0	0	4	2	2	4	0.5
1528	Ocyphaps lophotes	Crested pigeon	Europe	Spain	FALSE	6	3	0	0	0	0	0	9	6	3	9	0.666667
1529	Ocyphaps lophotes	Crested pigeon	Europe	Switzerland	FALSE	1	1	0	0	0	0	0	2	1	1	2	0.5
1532	Ocyphaps lophotes	Crested pigeon	Europe	United Kingdom	FALSE	3	2	7	2	0	0	0	12	3	2	5	0.6
1534	Ocyphaps lophotes	Crested pigeon	Europe	United Kingdom	FALSE	2	0	0	0	0	0	0	2	2	0	2	1
1535	Ocyphaps lophotes	Crested pigeon	Europe	United Kingdom	FALSE	2	1	5	0	0	0	0	8	2	1	3	0.666667
1538	Ocyphaps lophotes	Crested pigeon	North America	Canada	FALSE	4	3	1	0	0	0	0	8	4	3	7	0.571429
1539	Ocyphaps lophotes	Crested pigeon	North America	United States	FALSE	1	0	19	1	0	0	0	20	1	0	1	1
1540	Ocyphaps lophotes	Crested pigeon	North America	United States	FALSE	3	5	0	1	0	0	0	8	3	5	8	0.375
1541	Ocyphaps lophotes	Crested pigeon	North America	United States	FALSE	2	3	0	0	0	0	0	5	2	3	5	0.4
1542	Ocyphaps lophotes	Crested pigeon	North America	United States	FALSE	3	0	0	0	0	0	0	3	3	0	3	1
1543	Ocyphaps lophotes	Crested pigeon	North America	United States	FALSE	1	1	0	0	0	0	0	2	1	1	2	0.5
1544	Ocyphaps lophotes	Crested pigeon	North America	United States	FALSE	1	0	0	0	0	0	0	1	1	0	1	1
1545	Ocyphaps lophotes	Crested pigeon	North America	United States	FALSE	2	1	0	0	0	0	0	3	2	1	3	0.666667
1546	Ocyphaps lophotes	Crested pigeon	North America	United States	FALSE	1	0	1	0	0	0	0	2	1	0	1	1
1547	Ocyphaps lophotes	Crested pigeon	North America	United States	FALSE	3	0	0	0	0	0	0	3	3	0	3	1
1548	Ocyphaps lophotes	Crested pigeon	North America	United States	FALSE	3	5	0	1	0	0	0	8	3	5	8	0.375
1549	Ocyphaps lophotes	Crested pigeon	North America	United States	FALSE	2	0	0	0	0	0	0	2	2	0	2	1
1550	Ocyphaps lophotes lophotes	Crested pigeon	Europe	Denmark	FALSE	0	0	0	0	2	2	0	4	2	2	4	0.5
1552	Oena capensis	Namaqua dove	Asia	Singapore	FALSE	1	0	0	0	0	0	0	1	1	0	1	1
1553	Oena capensis	Namaqua dove	Asia	United Arab Emirates	FALSE	9	10	0	0	0	0	0	19	9	10	19	0.473684
1554	Oena capensis	Namaqua dove	Australia (Oceania)	Australia	FALSE	1	0	0	0	0	0	0	1	1	0	1	1
1555	Oena capensis	Namaqua dove	Europe	Austria	FALSE	6	0	1	1	0	0	0	7	6	0	6	1
1557	Oena capensis	Namaqua dove	Europe	France	FALSE	1	0	0	0	0	0	0	1	1	0	1	1
1558	Oena capensis	Namaqua dove	Europe	Germany	FALSE	1	1	0	0	0	0	0	2	1	1	2	0.5
1559	Oena capensis	Namaqua dove	Europe	Germany	FALSE	2	0	0	0	0	0	0	2	2	0	2	1
1560	Oena capensis	Namaqua dove	Europe	Germany	FALSE	1	0	0	0	0	0	0	1	1	0	1	1
1561	Oena capensis	Namaqua dove	Europe	Greece	FALSE	1	5	0	0	0	0	0	6	1	5	6	0.166667
1562	Oena capensis	Namaqua dove	Europe	Jersey	FALSE	3	3	2	4	0	0	0	8	3	3	6	0.5
1563	Oena capensis	Namaqua dove	Europe	Poland	FALSE	1	0	0	0	0	0	0	1	1	0	1	1
1564	Oena capensis	Namaqua dove	Europe	Spain	FALSE	1	1	0	0	0	0	0	2	1	1	2	0.5
1565	Oena capensis	Namaqua dove	Europe	Switzerland	FALSE	1	1	0	0	0	0	0	2	1	1	2	0.5
1566	Oena capensis	Namaqua dove	Europe	United Kingdom	FALSE	5	0	0	0	0	0	0	5	5	0	5	1
1567	Oena capensis	Namaqua dove	Europe	United Kingdom	FALSE	2	1	0	0	0	0	0	3	2	1	3	0.666667
1569	Oena capensis	Namaqua dove	North America	United States	FALSE	2	0	0	0	0	0	0	2	2	0	2	1
1570	Oena capensis	Namaqua dove	North America	United States	FALSE	6	6	6	5	0	0	0	18	6	6	12	0.5
1571	Oena capensis	Namaqua dove	North America	United States	FALSE	3	0	0	0	0	0	0	3	3	0	3	1
1572	Oena capensis capensis	Namaqua dove	Europe	Czech Republic	FALSE	1	0	0	0	0	0	0	1	1	0	1	1
1574	Otidiphaps nobilis	Green-naped pheasant-pigeon	Asia	Hong Kong	FALSE	1	1	0	0	0	0	0	2	1	1	2	0.5
1575	Otidiphaps nobilis	Green-naped pheasant-pigeon	Asia	Singapore	FALSE	3	1	0	0	0	0	0	4	3	1	4	0.75
1576	Otidiphaps nobilis	Green-naped pheasant-pigeon	Asia	Singapore	FALSE	1	1	0	0	0	0	0	2	1	1	2	0.5
1577	Otidiphaps nobilis	Green-naped pheasant-pigeon	Europe	Czech Republic	FALSE	1	1	0	0	0	0	0	2	1	1	2	0.5
1578	Otidiphaps nobilis	Green-naped pheasant-pigeon	Europe	Czech Republic	FALSE	1	1	0	0	0	0	0	2	1	1	2	0.5
1579	Otidiphaps nobilis	Green-naped pheasant-pigeon	Europe	Germany	FALSE	1	0	0	0	0	0	0	1	1	0	1	1
1580	Otidiphaps nobilis	Green-naped pheasant-pigeon	Europe	Germany	FALSE	4	4	0	0	0	0	0	8	4	4	8	0.5
1581	Otidiphaps nobilis	Green-naped pheasant-pigeon	Europe	Germany	FALSE	2	2	1	0	0	0	0	5	2	2	4	0.5
1582	Otidiphaps nobilis	Green-naped pheasant-pigeon	Europe	Netherlands	FALSE	3	2	0	0	0	0	0	5	3	2	5	0.6
1583	Otidiphaps nobilis	Green-naped pheasant-pigeon	Europe	United Kingdom	FALSE	1	1	0	0	0	0	0	2	1	1	2	0.5
1584	Otidiphaps nobilis	Green-naped pheasant-pigeon	Europe	United Kingdom	FALSE	1	1	0	0	0	0	0	2	1	1	2	0.5
1585	Otidiphaps nobilis	Green-naped pheasant-pigeon	Europe	United Kingdom	FALSE	1	2	0	1	0	0	0	3	1	2	3	0.333333
1586	Otidiphaps nobilis	Green-naped pheasant-pigeon	North America	Canada	FALSE	1	2	0	0	0	0	0	3	1	2	3	0.333333
1587	Otidiphaps nobilis	Green-naped pheasant-pigeon	North America	United States	FALSE	1	1	0	0	0	0	0	2	1	1	2	0.5
1588	Otidiphaps nobilis	Green-naped pheasant-pigeon	North America	United States	FALSE	1	1	0	0	0	0	0	2	1	1	2	0.5
1589	Otidiphaps nobilis	Green-naped pheasant-pigeon	North America	United States	FALSE	1	2	0	0	0	0	0	3	1	2	3	0.333333
1590	Otidiphaps nobilis	Green-naped pheasant-pigeon	North America	United States	FALSE	1	1	0	0	0	0	0	2	1	1	2	0.5
1591	Otidiphaps nobilis	Green-naped pheasant-pigeon	North America	United States	FALSE	4	0	0	0	0	0	0	4	4	0	4	1
1592	Otidiphaps nobilis	Green-naped pheasant-pigeon	North America	United States	FALSE	2	1	0	2	0	0	0	3	2	1	3	0.666667
1593	Otidiphaps nobilis	Green-naped pheasant-pigeon	North America	United States	FALSE	5	1	0	0	0	0	0	6	5	1	6	0.833333
1594	Otidiphaps nobilis	Green-naped pheasant-pigeon	North America	United States	FALSE	1	1	0	0	0	0	0	2	1	1	2	0.5
1595	Otidiphaps nobilis	Green-naped pheasant-pigeon	North America	United States	FALSE	0	4	0	0	0	0	0	4	0	4	4	0
1596	Otidiphaps nobilis	Green-naped pheasant-pigeon	North America	United States	FALSE	1	1	0	0	0	0	0	2	1	1	2	0.5
1597	Otidiphaps nobilis	Green-naped pheasant-pigeon	North America	United States	FALSE	2	0	0	0	0	0	0	2	2	0	2	1
1598	Otidiphaps nobilis	Green-naped pheasant-pigeon	North America	United States	FALSE	1	1	0	0	0	0	0	2	1	1	2	0.5
1599	Otidiphaps nobilis	Green-naped pheasant-pigeon	North America	United States	FALSE	0	3	0	0	0	0	0	3	0	3	3	0
1600	Otidiphaps nobilis	Green-naped pheasant-pigeon	North America	United States	FALSE	0	2	0	0	0	0	0	2	0	2	2	0
1601	Otidiphaps nobilis	Green-naped pheasant-pigeon	North America	United States	FALSE	1	1	0	0	0	0	0	2	1	1	2	0.5
1602	Otidiphaps nobilis	Green-naped pheasant-pigeon	North America	United States	FALSE	1	0	0	0	0	0	0	1	1	0	1	1
1603	Otidiphaps nobilis	Green-naped pheasant-pigeon	North America	United States	FALSE	1	1	0	0	0	0	0	2	1	1	2	0.5
1604	Otidiphaps nobilis	Green-naped pheasant-pigeon	North America	United States	FALSE	3	2	0	0	0	0	0	5	3	2	5	0.6
1605	Otidiphaps nobilis	Green-naped pheasant-pigeon	North America	United States	FALSE	2	0	0	0	0	0	0	2	2	0	2	1
1606	Otidiphaps nobilis	Green-naped pheasant-pigeon	North America	United States	FALSE	1	1	0	0	0	0	0	2	1	1	2	0.5
1607	Otidiphaps nobilis	Green-naped pheasant-pigeon	North America	United States	FALSE	1	1	0	0	0	0	0	2	1	1	2	0.5
1608	Otidiphaps nobilis	Green-naped pheasant-pigeon	North America	United States	FALSE	2	2	0	0	0	0	0	4	2	2	4	0.5
1609	Otidiphaps nobilis	Green-naped pheasant-pigeon	North America	United States	FALSE	0	2	0	0	0	0	0	2	0	2	2	0
1614	Otidiphaps aruensis	White-naped pheasant-pigeon	Europe	Denmark	FALSE	1	2	1	0	0	0	0	4	1	2	3	0.333333
1615	Otidiphaps aruensis	White-naped pheasant-pigeon	Europe	France	FALSE	1	1	0	0	0	0	0	2	1	1	2	0.5
1616	Otidiphaps aruensis	White-naped pheasant-pigeon	Europe	France	FALSE	0	1	0	0	0	0	0	1	0	1	1	0
1617	Otidiphaps aruensis	White-naped pheasant-pigeon	Europe	France	FALSE	1	1	0	0	0	0	0	2	1	1	2	0.5
1618	Otidiphaps aruensis	White-naped pheasant-pigeon	Europe	Germany	FALSE	1	1	0	0	0	0	0	2	1	1	2	0.5
1619	Otidiphaps aruensis	White-naped pheasant-pigeon	Europe	Germany	FALSE	1	1	0	0	0	0	0	2	1	1	2	0.5
1620	Otidiphaps aruensis	White-naped pheasant-pigeon	Europe	Germany	FALSE	1	1	0	0	0	0	0	2	1	1	2	0.5
1621	Otidiphaps aruensis	White-naped pheasant-pigeon	Europe	Germany	FALSE	0	1	0	0	0	0	0	1	0	1	1	0
1622	Otidiphaps aruensis	White-naped pheasant-pigeon	Europe	Germany	FALSE	3	4	0	0	0	0	0	7	3	4	7	0.428571
1623	Otidiphaps aruensis	White-naped pheasant-pigeon	Europe	Greece	FALSE	1	0	0	0	0	0	0	1	1	0	1	1
1624	Otidiphaps aruensis	White-naped pheasant-pigeon	Europe	Netherlands	FALSE	1	1	1	1	0	0	0	3	1	1	2	0.5
1625	Otidiphaps aruensis	White-naped pheasant-pigeon	Europe	Netherlands	FALSE	1	1	0	0	0	0	0	2	1	1	2	0.5
1626	Otidiphaps aruensis	White-naped pheasant-pigeon	Europe	Netherlands	FALSE	1	1	0	0	0	0	0	2	1	1	2	0.5
1627	Otidiphaps aruensis	White-naped pheasant-pigeon	Europe	Poland	FALSE	0	1	0	0	0	0	0	1	0	1	1	0
1628	Otidiphaps aruensis	White-naped pheasant-pigeon	Europe	Portugal	FALSE	1	1	0	0	0	0	0	2	1	1	2	0.5
1629	Otidiphaps aruensis	White-naped pheasant-pigeon	Europe	Spain	FALSE	4	3	0	0	0	0	0	7	4	3	7	0.571429
1630	Otidiphaps aruensis	White-naped pheasant-pigeon	Europe	United Kingdom	FALSE	3	2	1	2	0	0	0	6	3	2	5	0.6
1631	Otidiphaps aruensis	White-naped pheasant-pigeon	Europe	United Kingdom	FALSE	1	0	0	0	0	0	0	1	1	0	1	1
1632	Otidiphaps aruensis	White-naped pheasant-pigeon	Europe	United Kingdom	FALSE	2	1	0	0	0	0	0	3	2	1	3	0.666667
1633	Otidiphaps aruensis	White-naped pheasant-pigeon	Europe	United Kingdom	FALSE	1	1	0	0	0	0	0	2	1	1	2	0.5
1634	Otidiphaps aruensis	White-naped pheasant-pigeon	Europe	United Kingdom	FALSE	1	1	0	0	0	0	0	2	1	1	2	0.5
1635	Otidiphaps aruensis	White-naped pheasant-pigeon	North America	United States	FALSE	1	2	0	0	0	0	0	3	1	2	3	0.333333
1636	Otidiphaps aruensis	White-naped pheasant-pigeon	North America	United States	FALSE	2	1	0	0	0	0	0	3	2	1	3	0.666667
1637	Patagioenas corensis	Bare-eyed pigeon	North America	United States	FALSE	0	1	0	0	0	0	0	1	0	1	1	0
1638	Patagioenas fasciata	Northern Band-tailed pigeon	North America	United States	TRUE	1	0	1	0	0	0	0	2	1	0	1	1
1641	Patagioenas albilinea	Southern band-tailed pigeon	North America	United States	FALSE	4	3	1	0	0	0	0	8	4	3	7	0.571429
1642	Patagioenas albilinea	Southern band-tailed pigeon	North America	United States	FALSE	4	17	0	0	0	0	0	21	4	17	21	0.190476
1643	Patagioenas albilinea	Southern band-tailed pigeon	North America	United States	TRUE	7	2	0	0	0	0	0	9	7	2	9	0.777778
1644	Patagioenas albilinea	Southern band-tailed pigeon	North America	United States	FALSE	4	3	1	1	0	0	0	8	4	3	7	0.571429
1646	Patagioenas leucocephala	White-crowned pigeon	Asia	Singapore	FALSE	8	5	12	10	0	0	0	25	8	5	13	0.615385
1647	Patagioenas leucocephala	White-crowned pigeon	North America	Bahamas	TRUE	1	1	7	0	0	0	0	9	1	1	2	0.5
1648	Patagioenas leucocephala	White-crowned pigeon	North America	Cayman Islands	TRUE	0	1	1	0	0	0	0	2	0	1	1	0
1649	Patagioenas oenops	Peruvian pigeon	Asia	Singapore	FALSE	6	3	2	1	0	0	0	11	6	3	9	0.666667
1650	Patagioenas oenops	Peruvian pigeon	Asia	Singapore	FALSE	2	3	0	0	0	0	0	5	2	3	5	0.4
1651	Patagioenas oenops	Peruvian pigeon	Europe	France	FALSE	1	1	0	0	0	0	0	2	1	1	2	0.5
1652	Patagioenas oenops	Peruvian pigeon	Europe	Hungary	FALSE	0	0	0	0	0	1	0	1	0	1	1	0
1654	Patagioenas oenops	Peruvian pigeon	North America	United States	FALSE	0	2	0	0	0	0	0	2	0	2	2	0
1655	Patagioenas speciosa	Scaled pigeon	North America	United States	FALSE	2	3	2	0	0	0	0	7	2	3	5	0.4
1656	Patagioenas picazuro	Picazuro pigeon	Europe	Netherlands	FALSE	2	1	1	0	0	0	0	4	2	1	3	0.666667
1657	Patagioenas picazuro	Picazuro pigeon	Europe	Netherlands	FALSE	0	2	0	0	0	0	0	2	0	2	2	0
1658	Patagioenas picazuro	Picazuro pigeon	Europe	Portugal	FALSE	2	2	0	0	0	0	0	4	2	2	4	0.5
1659	Patagioenas picazuro	Picazuro pigeon	North America	United States	FALSE	0	1	0	0	0	0	0	1	0	1	1	0
1660	Patagioenas picazuro	Picazuro pigeon	South America	Brazil	TRUE	2	1	0	0	0	0	0	3	2	1	3	0.666667
1664	Petrophassa plumifera	Plumed pigeon	Australia (Oceania)	Australia	TRUE	2	3	4	0	0	0	0	9	2	3	5	0.4
1665	Petrophassa plumifera	Plumed pigeon	Australia (Oceania)	Australia	FALSE	1	1	0	0	0	0	0	2	1	1	2	0.5
1666	Petrophassa plumifera	Plumed pigeon	Europe	Germany	FALSE	2	1	0	0	0	0	0	3	2	1	3	0.666667
1667	Petrophassa plumifera plumifera	White-bellied plumed pigeon	Australia (Oceania)	Australia	FALSE	1	1	1	0	0	0	0	3	1	1	2	0.5
1668	Petrophassa plumifera plumifera	White-bellied plumed pigeon	Australia (Oceania)	Australia	FALSE	1	1	0	0	0	0	0	2	1	1	2	0.5
1669	Petrophassa smithii smithii	Partridge pigeon	Australia (Oceania)	Australia	TRUE	1	0	0	0	0	0	0	1	1	0	1	1
1670	Phapitreron leucotis	White-eared brown fruit dove	Europe	Czech Republic	FALSE	1	1	0	0	0	0	0	2	1	1	2	0.5
1671	Phapitreron leucotis	White-eared brown fruit dove	Europe	Germany	FALSE	0	1	0	0	0	0	0	1	0	1	1	0
1672	Phapitreron leucotis	White-eared brown fruit dove	Europe	Netherlands	FALSE	1	2	1	2	0	0	0	4	1	2	3	0.333333
1673	Phaps chalcoptera	Bronzewing pigeon	Asia	Cyprus	FALSE	0	2	1	0	0	0	0	3	0	2	2	0
1674	Phaps chalcoptera	Bronzewing pigeon	Asia	Singapore	FALSE	3	4	0	0	0	0	0	7	3	4	7	0.428571
1676	Phaps chalcoptera	Bronzewing pigeon	Australia (Oceania)	Australia	TRUE	0	2	0	0	0	0	0	2	0	2	2	0
1677	Phaps chalcoptera	Bronzewing pigeon	Australia (Oceania)	Australia	TRUE	1	1	6	4	0	0	0	8	1	1	2	0.5
1679	Phaps chalcoptera	Bronzewing pigeon	Australia (Oceania)	Australia	TRUE	0	0	0	0	1	1	2	4	1	1	2	0.5
1680	Phaps chalcoptera	Bronzewing pigeon	Australia (Oceania)	Australia	TRUE	2	1	1	0	0	0	0	4	2	1	3	0.666667
1681	Phaps chalcoptera	Bronzewing pigeon	Australia (Oceania)	Australia	TRUE	0	0	0	0	1	1	0	2	1	1	2	0.5
1682	Phaps chalcoptera	Bronzewing pigeon	Australia (Oceania)	Australia	TRUE	4	0	0	0	0	0	0	4	4	0	4	1
1683	Phaps chalcoptera	Bronzewing pigeon	Europe	Czech Republic	FALSE	1	0	0	0	0	0	0	1	1	0	1	1
1684	Phaps chalcoptera	Bronzewing pigeon	Europe	Czech Republic	FALSE	1	1	0	0	0	0	0	2	1	1	2	0.5
1685	Phaps chalcoptera	Bronzewing pigeon	Europe	Czech Republic	FALSE	1	0	0	0	0	0	0	1	1	0	1	1
1686	Phaps chalcoptera	Bronzewing pigeon	Europe	Denmark	FALSE	1	1	0	0	0	0	0	2	1	1	2	0.5
1687	Phaps chalcoptera	Bronzewing pigeon	Europe	France	FALSE	3	2	0	0	0	0	0	5	3	2	5	0.6
1688	Phaps chalcoptera	Bronzewing pigeon	Europe	France	FALSE	0	1	0	0	0	0	0	1	0	1	1	0
1689	Phaps chalcoptera	Bronzewing pigeon	Europe	France	FALSE	1	0	0	0	0	0	0	1	1	0	1	1
1691	Phaps chalcoptera	Bronzewing pigeon	Europe	Germany	FALSE	1	1	0	0	0	0	0	2	1	1	2	0.5
1693	Phaps chalcoptera	Bronzewing pigeon	Europe	Hungary	FALSE	1	1	0	0	0	0	0	2	1	1	2	0.5
1694	Phaps chalcoptera	Bronzewing pigeon	Europe	Netherlands	FALSE	0	1	0	0	0	0	0	1	0	1	1	0
1695	Phaps chalcoptera	Bronzewing pigeon	Europe	Netherlands	FALSE	1	0	0	0	0	0	0	1	1	0	1	1
1696	Phaps chalcoptera	Bronzewing pigeon	Europe	Poland	FALSE	2	0	0	0	0	0	0	2	2	0	2	1
1698	Phaps chalcoptera	Bronzewing pigeon	Europe	United Kingdom	FALSE	1	0	0	0	0	0	0	1	1	0	1	1
1699	Phaps chalcoptera	Bronzewing pigeon	North America	United States	FALSE	1	0	0	0	0	0	0	1	1	0	1	1
1700	Phaps elegans	Brush bronzewing pigeon	Australia (Oceania)	Australia	TRUE	1	1	0	0	0	0	0	2	1	1	2	0.5
1701	Phaps elegans	Brush bronzewing pigeon	Australia (Oceania)	Australia	TRUE	3	2	5	2	0	0	0	10	3	2	5	0.6
1702	Phaps elegans	Brush bronzewing pigeon	Australia (Oceania)	Australia	TRUE	2	2	0	0	0	0	0	4	2	2	4	0.5
1703	Phaps elegans	Brush bronzewing pigeon	Australia (Oceania)	Australia	TRUE	0	0	0	0	3	2	0	5	3	2	5	0.6
1704	Phaps elegans	Brush bronzewing pigeon	Australia (Oceania)	Australia	TRUE	3	1	0	0	0	0	0	4	3	1	4	0.75
1705	Phaps elegans	Brush bronzewing pigeon	Australia (Oceania)	Australia	FALSE	7	5	1	0	0	0	0	13	7	5	12	0.583333
1706	Phaps elegans	Brush bronzewing pigeon	Australia (Oceania)	Australia	TRUE	1	0	1	0	0	0	15	17	1	0	1	1
1707	Phaps elegans	Brush bronzewing pigeon	Australia (Oceania)	Australia	TRUE	14	1	2	0	0	0	0	17	14	1	15	0.933333
1708	Phaps elegans	Brush bronzewing pigeon	Europe	Belgium	FALSE	1	1	0	0	0	0	0	2	1	1	2	0.5
1709	Phaps elegans	Brush bronzewing pigeon	Europe	Czech Republic	FALSE	3	1	0	0	0	0	0	4	3	1	4	0.75
1710	Phaps elegans	Brush bronzewing pigeon	Europe	France	FALSE	1	0	0	0	0	0	0	1	1	0	1	1
1711	Phaps elegans	Brush bronzewing pigeon	Europe	Germany	FALSE	1	0	0	0	0	0	0	1	1	0	1	1
1712	Phaps histrionica	Flock pigeon	Australia (Oceania)	Australia	FALSE	1	0	0	0	0	0	0	1	1	0	1	1
1713	Ptilinopus aurantiifrons	Orange-fronted fruit dove	Asia	Singapore	FALSE	1	0	0	0	0	0	0	1	1	0	1	1
1714	Ptilinopus aurantiifrons	Orange-fronted fruit dove	Europe	Germany	FALSE	4	2	1	2	0	0	0	7	4	2	6	0.666667
1715	Ptilinopus aurantiifrons	Orange-fronted fruit dove	Europe	Germany	FALSE	0	1	0	0	0	0	0	1	0	1	1	0
1716	Ptilinopus aurantiifrons	Orange-fronted fruit dove	Europe	Netherlands	FALSE	2	3	1	0	0	0	0	6	2	3	5	0.4
1717	Ptilinopus coronulatus	Lilac-crowned fruit dove	North America	United States	FALSE	1	0	0	0	0	0	0	1	1	0	1	1
1718	Ptilinopus greyii	Red-bellied fruit dove	Australia (Oceania)	New Caledonia	TRUE	2	0	0	0	0	0	0	2	2	0	2	1
1719	Ptilinopus greyii	Red-bellied fruit dove	Europe	Czech Republic	FALSE	0	1	0	0	0	0	0	1	0	1	1	0
1720	Ptilinopus greyii	Red-bellied fruit dove	Europe	France	FALSE	1	0	0	0	0	0	0	1	1	0	1	1
1721	Ptilinopus greyii	Red-bellied fruit dove	Europe	Germany	FALSE	5	2	2	4	0	0	0	9	5	2	7	0.714286
1722	Ptilinopus greyii	Red-bellied fruit dove	Europe	Germany	FALSE	2	1	0	1	0	0	0	3	2	1	3	0.666667
1723	Ptilinopus greyii	Red-bellied fruit dove	Europe	Germany	FALSE	2	2	1	1	0	0	0	5	2	2	4	0.5
1724	Ptilinopus greyii	Red-bellied fruit dove	Europe	Germany	FALSE	1	1	0	0	0	0	0	2	1	1	2	0.5
1725	Ptilinopus greyii	Red-bellied fruit dove	Europe	Poland	FALSE	2	2	0	0	0	0	0	4	2	2	4	0.5
1727	Ptilinopus iozonus	Orange-bellied fruit dove	Europe	Germany	FALSE	1	1	0	0	0	0	0	2	1	1	2	0.5
1728	Ptilinopus iozonus humeralis	Orange-bellied fruit dove	Europe	Germany	FALSE	0	1	0	0	0	0	0	1	0	1	1	0
1729	Ptilinopus iozonus humeralis	Orange-bellied fruit dove	North America	United States	FALSE	1	0	0	0	0	0	0	1	1	0	1	1
1734	Ptilinopus melanospilus	Black-naped fruit-dove	Asia	Singapore	FALSE	1	0	0	0	0	0	0	1	1	0	1	1
1735	Ptilinopus melanospilus	Black-naped fruit-dove	Europe	Czech Republic	FALSE	5	3	0	1	0	0	0	8	5	3	8	0.625
1736	Ptilinopus melanospilus	Black-naped fruit-dove	Europe	France	FALSE	3	2	0	0	0	0	0	5	3	2	5	0.6
1737	Ptilinopus melanospilus	Black-naped fruit-dove	Europe	Germany	FALSE	3	3	1	2	0	0	0	7	3	3	6	0.5
1738	Ptilinopus melanospilus	Black-naped fruit-dove	Europe	Germany	FALSE	1	0	0	0	0	0	0	1	1	0	1	1
1739	Ptilinopus melanospilus	Black-naped fruit-dove	Europe	Germany	FALSE	1	3	0	2	0	0	0	4	1	3	4	0.25
1740	Ptilinopus melanospilus	Black-naped fruit-dove	Europe	Germany	FALSE	2	2	0	0	0	0	0	4	2	2	4	0.5
1741	Ptilinopus melanospilus	Black-naped fruit-dove	Europe	Germany	FALSE	1	2	0	1	0	0	0	3	1	2	3	0.333333
1742	Ptilinopus melanospilus	Black-naped fruit-dove	Europe	Germany	FALSE	3	1	0	1	0	0	0	4	3	1	4	0.75
1744	Ptilinopus melanospilus	Black-naped fruit-dove	Europe	Netherlands	FALSE	2	1	2	1	0	0	0	5	2	1	3	0.666667
1745	Ptilinopus melanospilus	Black-naped fruit-dove	Europe	Netherlands	FALSE	0	1	0	0	0	0	0	1	0	1	1	0
1746	Ptilinopus melanospilus	Black-naped fruit-dove	Europe	Netherlands	FALSE	2	1	0	0	0	0	0	3	2	1	3	0.666667
1747	Ptilinopus melanospilus	Black-naped fruit-dove	Europe	Poland	FALSE	2	1	0	0	0	0	0	3	2	1	3	0.666667
1748	Ptilinopus melanospilus	Black-naped fruit-dove	Europe	Slovakia	FALSE	1	0	0	0	0	0	0	1	1	0	1	1
1749	Ptilinopus melanospilus	Black-naped fruit-dove	Europe	Spain	FALSE	2	1	0	0	0	0	0	3	2	1	3	0.666667
1750	Ptilinopus melanospilus	Black-naped fruit-dove	Europe	Spain	FALSE	0	1	0	0	0	0	0	1	0	1	1	0
1751	Ptilinopus melanospilus	Black-naped fruit-dove	Europe	Switzerland	FALSE	1	0	0	0	0	0	0	1	1	0	1	1
1752	Ptilinopus melanospilus	Black-naped fruit-dove	Europe	United Kingdom	FALSE	1	0	1	1	0	0	0	2	1	0	1	1
1753	Ptilinopus melanospilus	Black-naped fruit-dove	Europe	United Kingdom	FALSE	3	1	0	0	0	0	0	4	3	1	4	0.75
1754	Ptilinopus melanospilus	Black-naped fruit-dove	Europe	United Kingdom	FALSE	2	1	0	1	0	0	0	3	2	1	3	0.666667
1755	Ptilinopus melanospilus	Black-naped fruit-dove	Europe	United Kingdom	FALSE	2	3	0	0	0	0	0	5	2	3	5	0.4
1756	Ptilinopus melanospilus	Black-naped fruit-dove	North America	Canada	FALSE	0	1	0	0	0	0	0	1	0	1	1	0
1757	Ptilinopus melanospilus	Black-naped fruit-dove	North America	United States	FALSE	2	0	0	0	0	0	0	2	2	0	2	1
1758	Ptilinopus melanospilus	Black-naped fruit-dove	North America	United States	FALSE	1	0	0	0	0	0	0	1	1	0	1	1
1759	Ptilinopus melanospilus	Black-naped fruit-dove	North America	United States	FALSE	1	0	0	0	0	0	0	1	1	0	1	1
1760	Ptilinopus melanospilus	Black-naped fruit-dove	North America	United States	FALSE	1	3	0	1	0	0	0	4	1	3	4	0.25
1761	Ptilinopus melanospilus	Black-naped fruit-dove	North America	United States	FALSE	2	0	0	0	0	0	0	2	2	0	2	1
1762	Ptilinopus melanospilus	Black-naped fruit-dove	North America	United States	FALSE	2	4	0	0	0	0	0	6	2	4	6	0.333333
1763	Ptilinopus melanospilus	Black-naped fruit-dove	North America	United States	FALSE	1	1	0	0	0	0	0	2	1	1	2	0.5
1764	Ptilinopus melanospilus	Black-naped fruit-dove	North America	United States	FALSE	2	1	0	0	0	0	0	3	2	1	3	0.666667
1765	Ptilinopus melanospilus	Black-naped fruit-dove	North America	United States	FALSE	1	1	0	0	0	0	0	2	1	1	2	0.5
1766	Ptilinopus melanospilus	Black-naped fruit-dove	North America	United States	FALSE	1	1	0	0	0	0	0	2	1	1	2	0.5
1767	Ptilinopus melanospilus	Black-naped fruit-dove	North America	United States	FALSE	1	1	0	0	0	1	0	3	1	2	3	0.333333
1768	Ptilinopus melanospilus	Black-naped fruit-dove	North America	United States	FALSE	1	0	0	0	0	0	0	1	1	0	1	1
1769	Ptilinopus melanospilus	Black-naped fruit-dove	North America	United States	FALSE	1	0	0	0	0	0	0	1	1	0	1	1
1770	Ptilinopus melanospilus	Black-naped fruit-dove	North America	United States	FALSE	3	2	0	0	0	0	0	5	3	2	5	0.6
1771	Ptilinopus melanospilus	Black-naped fruit-dove	North America	United States	FALSE	1	0	0	0	0	0	0	1	1	0	1	1
1772	Ptilinopus melanospilus	Black-naped fruit-dove	North America	United States	FALSE	2	1	0	0	0	0	0	3	2	1	3	0.666667
1773	Ptilinopus melanospilus	Black-naped fruit-dove	North America	United States	FALSE	3	3	0	0	0	0	0	6	3	3	6	0.5
1774	Ptilinopus melanospilus	Black-naped fruit-dove	North America	United States	FALSE	2	0	0	0	0	0	0	2	2	0	2	1
1775	Ptilinopus melanospilus	Black-naped fruit-dove	North America	United States	FALSE	1	2	0	0	0	0	0	3	1	2	3	0.333333
1776	Ptilinopus melanospilus	Black-naped fruit-dove	North America	United States	FALSE	1	1	0	0	0	0	0	2	1	1	2	0.5
1777	Ptilinopus melanospilus	Black-naped fruit-dove	North America	United States	FALSE	2	3	0	0	0	0	0	5	2	3	5	0.4
1778	Ptilinopus melanospilus	Black-naped fruit-dove	North America	United States	FALSE	1	1	0	0	0	0	0	2	1	1	2	0.5
1779	Ptilinopus melanospilus	Black-naped fruit-dove	North America	United States	FALSE	3	3	0	0	0	0	0	6	3	3	6	0.5
1780	Ptilinopus melanospilus	Black-naped fruit-dove	North America	United States	FALSE	0	1	0	0	0	0	0	1	0	1	1	0
1781	Ptilinopus melanospilus	Black-naped fruit-dove	North America	United States	FALSE	5	2	0	2	0	0	0	7	5	2	7	0.714286
1782	Ptilinopus melanospilus	Black-naped fruit-dove	North America	United States	FALSE	6	2	1	4	0	0	0	9	6	2	8	0.75
1783	Ptilinopus melanospilus	Black-naped fruit-dove	North America	United States	FALSE	2	1	0	1	0	0	0	3	2	1	3	0.666667
1784	Ptilinopus melanospilus	Black-naped fruit-dove	North America	United States	FALSE	1	0	0	0	0	0	0	1	1	0	1	1
1785	Ptilinopus perlatus	Pink-spotted fruit dove	Europe	Germany	FALSE	1	1	0	0	0	0	0	2	1	1	2	0.5
1786	Ptilinopus perlatus perlatus	Pink-spotted fruit dove	Europe	Germany	FALSE	3	1	0	0	0	0	0	4	3	1	4	0.75
1787	Ptilinopus perousii	Many-coloured fruit dove	North America	United States	FALSE	3	3	0	3	0	0	0	6	3	3	6	0.5
1788	Ptilinopus perousii	Many-coloured fruit dove	North America	United States	FALSE	6	5	2	5	0	0	0	13	6	5	11	0.545455
1789	Ptilinopus perousii	Many-coloured fruit dove	North America	United States	FALSE	14	18	0	0	0	0	0	32	14	18	32	0.4375
1790	Ptilinopus porphyreus	Pink-headed Fruit-dove	Asia	Indonesia	TRUE	7	7	0	0	0	0	0	14	7	7	14	0.5
1791	Ptilinopus porphyreus	Pink-headed Fruit-dove	Europe	France	FALSE	1	0	0	0	0	0	0	1	1	0	1	1
1792	Ptilinopus porphyreus	Pink-headed Fruit-dove	Europe	Germany	FALSE	2	2	1	3	0	0	0	5	2	2	4	0.5
1793	Ptilinopus porphyreus	Pink-headed Fruit-dove	Europe	Germany	FALSE	1	2	0	1	0	0	0	3	1	2	3	0.333333
1795	Ptilinopus porphyreus	Pink-headed Fruit-dove	Europe	United Kingdom	FALSE	2	2	0	0	0	0	0	4	2	2	4	0.5
1796	Ptilinopus porphyreus	Pink-headed Fruit-dove	Europe	United Kingdom	FALSE	3	2	1	3	0	0	0	6	3	2	5	0.6
1797	Ptilinopus porphyreus	Pink-headed Fruit-dove	North America	United States	FALSE	4	0	0	0	0	0	0	4	4	0	4	1
1798	Ptilinopus porphyreus	Pink-headed Fruit-dove	North America	United States	FALSE	4	0	0	0	0	0	0	4	4	0	4	1
1799	Ptilinopus porphyreus	Pink-headed Fruit-dove	North America	United States	FALSE	4	0	0	0	0	0	0	4	4	0	4	1
1800	Ptilinopus porphyreus	Pink-headed Fruit-dove	North America	United States	FALSE	4	5	1	4	0	0	0	10	4	5	9	0.444444
1801	Ptilinopus porphyreus	Pink-headed Fruit-dove	North America	United States	FALSE	1	0	0	0	0	0	0	1	1	0	1	1
1802	Ptilinopus porphyreus	Pink-headed Fruit-dove	North America	United States	FALSE	4	2	0	0	0	0	0	6	4	2	6	0.666667
1803	Ptilinopus porphyreus	Pink-headed Fruit-dove	North America	United States	FALSE	1	0	0	0	0	0	0	1	1	0	1	1
1804	Ptilinopus porphyreus	Pink-headed Fruit-dove	North America	United States	FALSE	2	1	0	0	0	0	0	3	2	1	3	0.666667
1805	Ptilinopus porphyreus	Pink-headed Fruit-dove	North America	United States	FALSE	38	42	5	25	0	0	0	85	38	42	80	0.475
1806	Ptilinopus pulchellus	Beautiful fruit dove	Europe	Austria	FALSE	0	1	1	0	2	2	0	6	2	3	5	0.4
1807	Ptilinopus pulchellus	Beautiful fruit dove	Europe	Czech Republic	FALSE	1	2	0	1	0	0	0	3	1	2	3	0.333333
1808	Ptilinopus pulchellus	Beautiful fruit dove	Europe	Germany	FALSE	1	1	0	0	0	0	0	2	1	1	2	0.5
1809	Ptilinopus pulchellus	Beautiful fruit dove	Europe	Germany	FALSE	1	1	0	0	0	0	0	2	1	1	2	0.5
1810	Ptilinopus pulchellus	Beautiful fruit dove	Europe	Germany	FALSE	3	3	0	0	0	0	0	6	3	3	6	0.5
1811	Ptilinopus pulchellus	Beautiful fruit dove	Europe	Germany	FALSE	2	1	1	2	0	0	0	4	2	1	3	0.666667
1812	Ptilinopus pulchellus	Beautiful fruit dove	Europe	Netherlands	FALSE	1	1	0	0	0	0	0	2	1	1	2	0.5
1813	Ptilinopus pulchellus	Beautiful fruit dove	Europe	Poland	FALSE	1	1	0	0	0	0	0	2	1	1	2	0.5
1814	Ptilinopus pulchellus	Beautiful fruit dove	Europe	Poland	FALSE	1	1	0	0	0	0	0	2	1	1	2	0.5
1815	Ptilinopus pulchellus	Beautiful fruit dove	North America	United States	FALSE	1	0	0	0	0	0	0	1	1	0	1	1
1816	Ptilinopus pulchellus	Beautiful fruit dove	North America	United States	FALSE	4	1	0	2	0	0	0	5	4	1	5	0.8
1817	Ptilinopus pulchellus	Beautiful fruit dove	North America	United States	FALSE	8	7	1	5	0	0	0	16	8	7	15	0.533333
1818	Ptilinopus pulchellus	Beautiful fruit dove	North America	United States	FALSE	2	0	0	0	0	0	0	2	2	0	2	1
1819	Ptilinopus pulchellus	Beautiful fruit dove	North America	United States	FALSE	3	8	0	1	0	0	0	11	3	8	11	0.272727
1820	Ptilinopus pulchellus	Beautiful fruit dove	North America	United States	FALSE	1	2	1	1	0	0	0	4	1	2	3	0.333333
1821	Ptilinopus pulchellus	Beautiful fruit dove	North America	United States	FALSE	1	1	0	0	0	0	0	2	1	1	2	0.5
1822	Ptilinopus pulchellus	Beautiful fruit dove	North America	United States	FALSE	1	1	0	0	0	0	0	2	1	1	2	0.5
1823	Ptilinopus pulchellus	Beautiful fruit dove	North America	United States	FALSE	1	3	1	1	0	0	0	5	1	3	4	0.25
1824	Ptilinopus pulchellus	Beautiful fruit dove	North America	United States	FALSE	1	1	0	0	0	0	0	2	1	1	2	0.5
1825	Ptilinopus pulchellus	Beautiful fruit dove	North America	United States	FALSE	1	2	0	0	0	0	0	3	1	2	3	0.333333
1826	Ptilinopus pulchellus	Beautiful fruit dove	North America	United States	FALSE	1	1	0	0	0	0	0	2	1	1	2	0.5
1827	Ptilinopus pulchellus	Beautiful fruit dove	North America	United States	FALSE	3	1	1	3	0	0	0	5	3	1	4	0.75
1828	Ptilinopus pulchellus	Beautiful fruit dove	North America	United States	FALSE	0	2	0	0	0	0	0	2	0	2	2	0
1829	Ptilinopus pulchellus	Beautiful fruit dove	North America	United States	FALSE	2	6	0	0	0	0	0	8	2	6	8	0.25
1830	Ptilinopus pulchellus	Beautiful fruit dove	North America	United States	FALSE	3	1	0	1	0	0	0	4	3	1	4	0.75
1831	Ptilinopus pulchellus	Beautiful fruit dove	North America	United States	FALSE	2	0	0	0	0	0	0	2	2	0	2	1
1832	Ptilinopus pulchellus	Beautiful fruit dove	North America	United States	FALSE	4	1	0	1	0	0	0	5	4	1	5	0.8
1833	Ptilinopus pulchellus	Beautiful fruit dove	North America	United States	FALSE	2	1	0	0	0	0	0	3	2	1	3	0.666667
1834	Ptilinopus pulchellus pulchellus	Crimson-capped fruit dove	Europe	Czech Republic	FALSE	1	0	0	0	0	0	0	1	1	0	1	1
1835	Ptilinopus pulchellus pulchellus	Crimson-capped fruit dove	Europe	Germany	FALSE	0	1	0	0	0	0	0	1	0	1	1	0
1836	Ptilinopus regina	Red-crowned pigeon	Australia (Oceania)	Australia	FALSE	4	3	0	0	0	0	0	7	4	3	7	0.571429
1837	Ptilinopus regina	Red-crowned pigeon	Australia (Oceania)	Australia	TRUE	4	0	0	0	0	0	0	4	4	0	4	1
1838	Ptilinopus regina	Red-crowned pigeon	Australia (Oceania)	Australia	FALSE	1	0	0	0	0	0	0	1	1	0	1	1
1839	Ptilinopus regina	Red-crowned pigeon	Australia (Oceania)	Australia	TRUE	1	0	0	0	0	0	0	1	1	0	1	1
1840	Ptilinopus regina	Red-crowned pigeon	Australia (Oceania)	Australia	TRUE	8	5	2	5	0	0	0	15	8	5	13	0.615385
1841	Ptilinopus regina	Red-crowned pigeon	Australia (Oceania)	Australia	FALSE	1	0	0	0	0	0	0	1	1	0	1	1
1842	Ptilinopus regina	Red-crowned pigeon	Australia (Oceania)	Australia	FALSE	0	2	0	0	0	0	0	2	0	2	2	0
1843	Ptilinopus regina	Red-crowned pigeon	Australia (Oceania)	Australia	FALSE	1	3	0	0	0	0	0	4	1	3	4	0.25
1844	Ptilinopus regina	Red-crowned pigeon	Australia (Oceania)	Australia	TRUE	1	4	1	0	0	0	0	6	1	4	5	0.2
1845	Ptilinopus regina	Red-crowned pigeon	Australia (Oceania)	Australia	TRUE	13	12	0	0	0	0	0	25	13	12	25	0.52
1846	Ptilinopus regina	Red-crowned pigeon	Australia (Oceania)	Australia	TRUE	0	2	0	0	0	0	0	2	0	2	2	0
1847	Ptilinopus regina	Red-crowned pigeon	Europe	Germany	FALSE	1	2	1	0	0	0	0	4	1	2	3	0.333333
1848	Ptilinopus regina ewingii	Rose-crowned fruit dove	Australia (Oceania)	Australia	TRUE	3	1	1	1	0	0	0	5	3	1	4	0.75
1849	Ptilinopus regina regina	Rose-crowned fruit dove	Australia (Oceania)	Australia	FALSE	1	1	0	0	0	0	0	2	1	1	2	0.5
1850	Ptilinopus regina flavicollis	Rose-crowned fruit dove	Europe	Germany	FALSE	0	1	0	0	0	0	0	1	0	1	1	0
1851	Ptilinopus regina flavicollis	Rose-crowned fruit dove	Europe	Poland	FALSE	0	1	0	0	0	0	0	1	0	1	1	0
1852	Ptilinopus rivoli	White-breasted fruit dove	Australia (Oceania)	Papua New Guinea	TRUE	1	0	0	0	0	0	0	1	1	0	1	1
1853	Ptilinopus roseicapilla	Mariana fruit dove	North America	United States	FALSE	1	1	0	0	0	0	0	2	1	1	2	0.5
1854	Ptilinopus roseicapilla	Mariana fruit dove	North America	United States	FALSE	5	2	1	2	0	0	0	8	5	2	7	0.714286
1855	Ptilinopus roseicapilla	Mariana fruit dove	North America	United States	FALSE	1	0	0	0	0	0	0	1	1	0	1	1
1856	Ptilinopus roseicapilla	Mariana fruit dove	North America	United States	FALSE	2	4	0	2	0	0	0	6	2	4	6	0.333333
1857	Ptilinopus roseicapilla	Mariana fruit dove	North America	United States	FALSE	1	1	0	0	0	0	0	2	1	1	2	0.5
1858	Ptilinopus roseicapilla	Mariana fruit dove	North America	United States	FALSE	3	2	0	0	0	0	0	5	3	2	5	0.6
1859	Ptilinopus roseicapilla	Mariana fruit dove	North America	United States	FALSE	5	3	0	0	0	0	0	8	5	3	8	0.625
1860	Ptilinopus roseicapilla	Mariana fruit dove	North America	United States	FALSE	2	1	0	0	0	0	0	3	2	1	3	0.666667
1861	Ptilinopus roseicapilla	Mariana fruit dove	North America	United States	FALSE	1	2	0	0	0	0	0	3	1	2	3	0.333333
1862	Ptilinopus roseicapilla	Mariana fruit dove	North America	United States	FALSE	1	0	0	0	0	0	0	1	1	0	1	1
1863	Ptilinopus superbus	Superb fruit dove	Asia	Singapore	FALSE	3	2	0	0	0	0	0	5	3	2	5	0.6
1864	Ptilinopus superbus	Superb fruit dove	Australia (Oceania)	Australia	FALSE	2	0	0	0	0	0	0	2	2	0	2	1
1865	Ptilinopus superbus	Superb fruit dove	Australia (Oceania)	Australia	TRUE	1	0	0	0	0	0	0	1	1	0	1	1
1866	Ptilinopus superbus	Superb fruit dove	Australia (Oceania)	Australia	TRUE	1	1	1	0	0	0	0	3	1	1	2	0.5
1867	Ptilinopus superbus	Superb fruit dove	Australia (Oceania)	Australia	TRUE	18	14	3	5	0	0	0	35	18	14	32	0.5625
1868	Ptilinopus superbus	Superb fruit dove	Australia (Oceania)	Papua New Guinea	TRUE	1	0	0	0	0	0	0	1	1	0	1	1
1869	Ptilinopus superbus	Superb fruit dove	Europe	Czech Republic	FALSE	1	1	0	0	0	0	0	2	1	1	2	0.5
1870	Ptilinopus superbus	Superb fruit dove	Europe	Czech Republic	FALSE	1	1	0	0	0	0	0	2	1	1	2	0.5
1871	Ptilinopus superbus	Superb fruit dove	Europe	Czech Republic	FALSE	1	1	0	0	0	0	0	2	1	1	2	0.5
1872	Ptilinopus superbus	Superb fruit dove	Europe	France	FALSE	0	1	0	0	0	0	0	1	0	1	1	0
1873	Ptilinopus superbus	Superb fruit dove	Europe	Germany	FALSE	1	1	0	0	0	0	0	2	1	1	2	0.5
1874	Ptilinopus superbus	Superb fruit dove	Europe	Germany	FALSE	1	1	1	1	0	0	0	3	1	1	2	0.5
1875	Ptilinopus superbus	Superb fruit dove	Europe	Germany	FALSE	1	1	0	0	0	0	0	2	1	1	2	0.5
1876	Ptilinopus superbus	Superb fruit dove	Europe	Germany	FALSE	1	2	0	0	0	0	0	3	1	2	3	0.333333
1877	Ptilinopus superbus	Superb fruit dove	Europe	Netherlands	FALSE	9	7	0	7	0	0	0	16	9	7	16	0.5625
1878	Ptilinopus superbus	Superb fruit dove	Europe	Poland	FALSE	2	3	1	1	0	0	0	6	2	3	5	0.4
1879	Ptilinopus superbus	Superb fruit dove	Europe	Spain	FALSE	2	4	0	0	0	0	0	6	2	4	6	0.333333
1880	Ptilinopus superbus	Superb fruit dove	Europe	United Kingdom	FALSE	6	6	1	2	0	0	0	13	6	6	12	0.5
1881	Ptilinopus superbus	Superb fruit dove	Europe	United Kingdom	FALSE	1	1	0	0	0	0	0	2	1	1	2	0.5
1882	Ptilinopus superbus	Superb fruit dove	Europe	United Kingdom	FALSE	2	1	0	0	0	0	0	3	2	1	3	0.666667
1883	Ptilinopus superbus superbus	Superb fruit dove	Australia (Oceania)	Australia	FALSE	2	2	1	1	0	0	0	5	2	2	4	0.5
1885	Scardafella inca	Inca dove	North America	United States	FALSE	1	0	0	0	0	0	0	1	1	0	1	1
1886	Starnoenas cyanocephala	Blue-headed quail dove	Europe	France	FALSE	1	2	0	0	0	0	0	3	1	2	3	0.333333
1887	Starnoenas cyanocephala	Blue-headed quail dove	Europe	Germany	FALSE	2	2	0	0	0	0	0	4	2	2	4	0.5
1888	Starnoenas cyanocephala	Blue-headed quail dove	Europe	Germany	FALSE	1	1	0	0	0	0	0	2	1	1	2	0.5
1889	Starnoenas cyanocephala	Blue-headed quail dove	Europe	Poland	FALSE	2	1	2	2	0	0	0	5	2	1	3	0.666667
1890	Starnoenas cyanocephala	Blue-headed quail dove	Europe	Switzerland	FALSE	3	3	1	2	0	0	0	7	3	3	6	0.5
1891	Streptopelia	Turtle dove	Asia	Israel	FALSE	0	0	0	0	2	0	0	2	2	0	2	1
1895	Streptopelia bitorquata	Javan turtle dove	Europe	United Kingdom	FALSE	1	1	0	0	0	0	0	2	1	1	2	0.5
1897	Streptopelia capicola	Ring-necked dove	Asia	India	FALSE	0	0	0	0	1	0	4	5	1	0	1	1
1899	Streptopelia capicola	Ring-necked dove	Europe	Czech Republic	FALSE	1	2	0	0	0	0	0	3	1	2	3	0.333333
1900	Streptopelia capicola	Ring-necked dove	Europe	Czech Republic	FALSE	0	2	0	0	0	0	0	2	0	2	2	0
1901	Streptopelia capicola	Ring-necked dove	Europe	Germany	FALSE	2	2	0	0	0	0	0	4	2	2	4	0.5
1903	Streptopelia capicola	Ring-necked dove	Europe	Slovakia	FALSE	1	1	0	0	0	0	0	2	1	1	2	0.5
1904	Streptopelia capicola	Ring-necked dove	Europe	Switzerland	FALSE	1	0	0	0	0	0	0	1	1	0	1	1
1905	Streptopelia capicola	Ring-necked dove	North America	Canada	FALSE	2	0	0	0	0	0	0	2	2	0	2	1
1906	Streptopelia capicola	Ring-necked dove	North America	United States	FALSE	3	0	0	0	0	0	0	3	3	0	3	1
1907	Streptopelia capicola	Ring-necked dove	North America	United States	FALSE	0	1	0	0	0	0	0	1	0	1	1	0
1909	Streptopelia capicola	Ring-necked dove	North America	United States	FALSE	0	1	0	0	0	0	0	1	0	1	1	0
1910	Streptopelia capicola	Ring-necked dove	North America	United States	FALSE	2	0	0	0	0	0	0	2	2	0	2	1
1911	Streptopelia capicola	Ring-necked dove	North America	United States	FALSE	3	4	0	0	0	0	0	7	3	4	7	0.428571
1912	Streptopelia capicola	Ring-necked dove	North America	United States	FALSE	0	1	1	0	0	0	0	2	0	1	1	0
1914	Streptopelia capicola	Ring-necked dove	North America	United States	FALSE	1	0	0	0	0	0	0	1	1	0	1	1
1915	Streptopelia capicola	Ring-necked dove	North America	United States	FALSE	0	1	0	0	0	0	0	1	0	1	1	0
1916	Streptopelia capicola	Ring-necked dove	North America	United States	FALSE	1	0	0	0	0	0	0	1	1	0	1	1
1918	Streptopelia capicola	Ring-necked dove	North America	United States	FALSE	1	0	0	0	0	0	0	1	1	0	1	1
1920	Streptopelia capicola	Ring-necked dove	North America	United States	FALSE	0	2	2	1	0	0	0	4	0	2	2	0
1921	Streptopelia capicola capicola	Ring-necked dove	Europe	Czech Republic	FALSE	1	0	0	0	0	0	0	1	1	0	1	1
1922	Streptopelia capicola capicola	Ring-necked dove	Europe	Czech Republic	FALSE	1	1	0	0	0	0	0	2	1	1	2	0.5
1923	Streptopelia capicola capicola	Ring-necked dove	North America	United States	FALSE	1	1	0	0	0	0	0	2	1	1	2	0.5
1934	Streptopelia decaocto	Collared dove	Asia	Japan	TRUE	2	2	0	0	8	10	1	23	10	12	22	0.454545
1936	Streptopelia decaocto	Collared dove	Asia	Sri Lanka	TRUE	0	10	1	0	0	0	0	11	0	10	10	0
1941	Streptopelia decaocto	Collared dove	Europe	Belarus	TRUE	0	0	0	0	3	5	0	8	3	5	8	0.375
1944	Streptopelia decaocto	Collared dove	Europe	Netherlands	TRUE	1	0	0	0	0	0	0	1	1	0	1	1
1945	Streptopelia decaocto	Collared dove	Europe	Netherlands	TRUE	1	0	0	0	0	0	0	1	1	0	1	1
1946	Streptopelia decaocto	Collared dove	Europe	Russian Federation	TRUE	0	0	0	0	9	16	15	40	9	16	25	0.36
1947	Streptopelia decaocto	Collared dove	Europe	Russian Federation	TRUE	1	0	0	0	0	0	0	1	1	0	1	1
1950	Streptopelia decaocto	Collared dove	North America	United States	FALSE	2	0	0	0	0	0	0	2	2	0	2	1
1952	Streptopelia decaocto	Collared dove	North America	United States	FALSE	0	1	0	0	0	0	0	1	0	1	1	0
1953	Streptopelia decaocto	Collared dove	North America	United States	FALSE	0	1	0	0	0	0	0	1	0	1	1	0
1955	Streptopelia decaocto	Collared dove	North America	United States	FALSE	0	1	0	0	0	0	0	1	0	1	1	0
1956	Streptopelia decaocto	Collared dove	North America	United States	FALSE	2	1	0	0	0	0	0	3	2	1	3	0.666667
1957	Streptopelia decaocto	Collared dove	North America	United States	FALSE	0	1	0	0	0	0	0	1	0	1	1	0
1959	Streptopelia decaocto	Collared dove	South America	Colombia	FALSE	0	1	8	0	0	0	0	9	0	1	1	0
1960	Streptopelia decaocto decaocto	Collared dove	Asia	India	TRUE	0	0	0	0	5	6	0	11	5	6	11	0.454545
1961	Streptopelia decaocto decaocto	Collared dove	Asia	Japan	TRUE	4	1	0	0	0	0	0	5	4	1	5	0.8
1962	Streptopelia hypopyrrha	Adamawa turtle dove	North America	United States	FALSE	3	3	0	0	0	0	0	6	3	3	6	0.5
1963	Streptopelia hypopyrrha	Adamawa turtle dove	North America	United States	FALSE	3	8	0	0	0	0	0	11	3	8	11	0.272727
1964	Streptopelia lugens	Pink-breasted dove	Asia	Singapore	FALSE	1	0	0	0	0	0	0	1	1	0	1	1
1965	Streptopelia lugens	Pink-breasted dove	Asia	United Arab Emirates	FALSE	5	6	0	0	0	0	0	11	5	6	11	0.454545
1966	Streptopelia lugens	Pink-breasted dove	Europe	Czech Republic	FALSE	3	1	0	0	0	0	0	4	3	1	4	0.75
1968	Streptopelia orientalis	Oriental turtle dove	Asia	Taiwan	TRUE	3	5	0	0	0	0	0	8	3	5	8	0.375
1969	Streptopelia orientalis	Oriental turtle dove	Europe	Germany	FALSE	3	0	0	0	0	0	0	3	3	0	3	1
1970	Streptopelia orientalis	Oriental turtle dove	Europe	Germany	FALSE	1	1	0	0	0	0	0	2	1	1	2	0.5
1971	Streptopelia orientalis orientalis	Oriental turtle dove	Asia	Japan	TRUE	0	1	0	0	0	0	0	1	0	1	1	0
1972	Streptopelia orientalis orientalis	Oriental turtle dove	Asia	Japan	TRUE	2	0	0	0	0	0	0	2	2	0	2	1
1973	Streptopelia orientalis orientalis	Oriental turtle dove	Europe	Czech Republic	FALSE	2	1	0	0	0	0	0	3	2	1	3	0.666667
1974	Streptopelia orientalis orientalis	Oriental turtle dove	Europe	Germany	FALSE	0	1	0	0	0	0	0	1	0	1	1	0
1975	Streptopelia orientalis orientalis	Oriental turtle dove	Europe	Poland	FALSE	0	2	0	0	0	0	0	2	0	2	2	0
1976	Streptopelia picturata picturata	Madagascar turtle dove	Europe	Czech Republic	FALSE	6	6	3	5	0	0	0	15	6	6	12	0.5
1977	Streptopelia picturata picturata	Madagascar turtle dove	Europe	Czech Republic	FALSE	1	1	0	0	0	0	0	2	1	1	2	0.5
1978	Streptopelia picturata picturata	Madagascar turtle dove	Europe	Czech Republic	FALSE	1	0	0	0	0	0	0	1	1	0	1	1
1979	Streptopelia picturata picturata	Madagascar turtle dove	Europe	Germany	FALSE	1	0	0	0	0	0	0	1	1	0	1	1
1983	Streptopelia risoria	Ringed turtle dove	Asia	India	FALSE	0	0	0	0	1	1	0	2	1	1	2	0.5
1985	Streptopelia risoria	Ringed turtle dove	Europe	Belarus	FALSE	0	0	0	0	1	1	3	5	1	1	2	0.5
1986	Streptopelia risoria	Ringed turtle dove	Europe	Hungary	FALSE	0	0	0	0	1	1	8	10	1	1	2	0.5
1988	Streptopelia risoria	Ringed turtle dove	Europe	Jersey	FALSE	6	6	0	0	0	0	0	12	6	6	12	0.5
1990	Streptopelia risoria	Ringed turtle dove	Europe	Norway	FALSE	2	0	0	0	0	0	0	2	2	0	2	1
1991	Streptopelia risoria	Ringed turtle dove	Europe	Russian Federation	FALSE	2	1	0	0	0	0	0	3	2	1	3	0.666667
1992	Streptopelia risoria	Ringed turtle dove	Europe	Russian Federation	FALSE	0	0	0	0	5	4	11	20	5	4	9	0.555556
1993	Streptopelia risoria	Ringed turtle dove	Europe	Russian Federation	FALSE	1	2	10	3	1	0	0	14	2	2	4	0.5
1994	Streptopelia risoria	Ringed turtle dove	Europe	Russian Federation	FALSE	1	1	2	0	0	0	0	4	1	1	2	0.5
1998	Streptopelia risoria	Ringed turtle dove	Europe	United Kingdom	FALSE	2	2	0	0	0	0	0	4	2	2	4	0.5
1999	Streptopelia risoria	Ringed turtle dove	Europe	United Kingdom	FALSE	13	13	5	1	0	0	0	31	13	13	26	0.5
2000	Streptopelia risoria	Ringed turtle dove	Europe	United Kingdom	FALSE	5	3	6	1	0	0	0	14	5	3	8	0.625
2001	Streptopelia risoria	Ringed turtle dove	Europe	United Kingdom	FALSE	3	3	0	0	0	0	0	6	3	3	6	0.5
2004	Streptopelia risoria	Ringed turtle dove	North America	United States	TRUE	0	1	0	0	0	0	0	1	0	1	1	0
2006	Streptopelia risoria	Ringed turtle dove	North America	United States	TRUE	2	2	0	0	0	0	0	4	2	2	4	0.5
2007	Streptopelia risoria	Ringed turtle dove	North America	United States	TRUE	1	0	0	0	0	0	0	1	1	0	1	1
2008	Streptopelia risoria	Ringed turtle dove	North America	United States	TRUE	4	2	0	0	0	0	0	6	4	2	6	0.666667
2010	Streptopelia risoria	Ringed turtle dove	North America	United States	TRUE	1	4	0	0	0	0	0	5	1	4	5	0.2
2011	Streptopelia risoria	Ringed turtle dove	North America	United States	TRUE	6	4	0	0	1	2	0	13	7	6	13	0.538462
2012	Streptopelia risoria	Ringed turtle dove	North America	United States	TRUE	2	0	0	0	0	0	0	2	2	0	2	1
2013	Streptopelia risoria	Ringed turtle dove	North America	United States	TRUE	0	2	0	0	0	0	0	2	0	2	2	0
2014	Streptopelia risoria	Ringed turtle dove	North America	United States	TRUE	2	0	0	0	0	0	0	2	2	0	2	1
2015	Streptopelia risoria	Ringed turtle dove	North America	United States	TRUE	4	2	0	0	0	0	0	6	4	2	6	0.666667
2016	Streptopelia risoria	Ringed turtle dove	North America	United States	TRUE	4	1	0	0	0	0	0	5	4	1	5	0.8
2017	Streptopelia risoria	Ringed turtle dove	North America	United States	TRUE	2	0	0	0	0	0	0	2	2	0	2	1
2019	Streptopelia risoria	Ringed turtle dove	North America	United States	TRUE	2	1	1	1	0	0	0	4	2	1	3	0.666667
2020	Streptopelia risoria	Ringed turtle dove	North America	United States	TRUE	2	2	0	0	0	0	0	4	2	2	4	0.5
2021	Streptopelia risoria	Ringed turtle dove	North America	United States	TRUE	2	2	0	0	0	0	0	4	2	2	4	0.5
2022	Streptopelia risoria	Ringed turtle dove	North America	United States	TRUE	1	0	0	0	0	0	0	1	1	0	1	1
2025	Streptopelia roseogrisea	Pink-headed turtle dove	Europe	Czech Republic	FALSE	1	1	16	6	0	0	0	18	1	1	2	0.5
2026	Streptopelia roseogrisea	Pink-headed turtle dove	Europe	France	FALSE	2	1	0	1	0	0	0	3	2	1	3	0.666667
2029	Streptopelia roseogrisea	Pink-headed turtle dove	Europe	Russian Federation	FALSE	0	0	0	0	3	3	1	7	3	3	6	0.5
2031	Streptopelia roseogrisea	Pink-headed turtle dove	Europe	Slovakia	FALSE	1	1	0	0	0	0	0	2	1	1	2	0.5
2032	Streptopelia roseogrisea	Pink-headed turtle dove	Europe	Slovenia	FALSE	2	0	0	0	0	0	0	2	2	0	2	1
2033	Streptopelia roseogrisea	Pink-headed turtle dove	North America	United States	FALSE	2	2	0	0	0	0	0	4	2	2	4	0.5
2034	Streptopelia roseogrisea	Pink-headed turtle dove	North America	United States	FALSE	5	3	0	0	0	0	0	8	5	3	8	0.625
2035	Streptopelia roseogrisea	Pink-headed turtle dove	North America	United States	FALSE	0	2	0	0	0	0	0	2	0	2	2	0
2037	Streptopelia semitorquata	Red-eyed dove	Asia	United Arab Emirates	FALSE	0	2	0	0	0	0	0	2	0	2	2	0
2038	Streptopelia semitorquata	Red-eyed dove	Europe	Spain	FALSE	8	4	0	2	0	0	0	12	8	4	12	0.666667
2046	Streptopelia tranquebarica	Red turtle dove	Asia	Hong Kong	FALSE	2	0	8	0	0	0	0	10	2	0	2	1
2048	Streptopelia tranquebarica	Red turtle dove	Europe	Germany	FALSE	2	1	10	0	0	0	0	13	2	1	3	0.666667
2050	Streptopelia tranquebarica	Red turtle dove	Europe	Poland	FALSE	1	1	4	2	0	0	0	6	1	1	2	0.5
2051	Streptopelia tranquebarica	Red turtle dove	Europe	United Kingdom	FALSE	3	2	0	0	0	0	0	5	3	2	5	0.6
2053	Streptopelia tranquebarica humilis	Red-collared dove	Europe	Czech Republic	FALSE	3	4	0	2	0	0	0	7	3	4	7	0.428571
2055	Streptopelia turtur	Turtle dove	Asia	Israel	TRUE	0	1	1	0	0	0	0	2	0	1	1	0
2056	Streptopelia turtur	Turtle dove	Asia	Singapore	FALSE	1	0	0	0	0	0	0	1	1	0	1	1
2057	Streptopelia turtur	Turtle dove	Asia	United Arab Emirates	TRUE	4	4	0	0	0	0	0	8	4	4	8	0.5
2058	Streptopelia turtur	Turtle dove	Europe	Belgium	TRUE	3	2	1	2	0	0	0	6	3	2	5	0.6
2059	Streptopelia turtur	Turtle dove	Europe	Belgium	TRUE	1	2	0	0	0	0	0	3	1	2	3	0.333333
2060	Streptopelia turtur	Turtle dove	Europe	Croatia	TRUE	4	2	0	0	0	0	0	6	4	2	6	0.666667
2062	Streptopelia turtur	Turtle dove	Europe	Czech Republic	TRUE	1	1	2	0	0	0	0	4	1	1	2	0.5
2063	Streptopelia turtur	Turtle dove	Europe	Czech Republic	TRUE	5	1	2	7	0	0	0	8	5	1	6	0.833333
2064	Streptopelia turtur	Turtle dove	Europe	Germany	TRUE	1	3	0	0	0	0	0	4	1	3	4	0.25
2065	Streptopelia turtur	Turtle dove	Europe	Germany	TRUE	2	2	0	0	0	0	0	4	2	2	4	0.5
2066	Streptopelia turtur	Turtle dove	Europe	Germany	TRUE	0	3	0	2	0	0	0	3	0	3	3	0
2067	Streptopelia turtur	Turtle dove	Europe	Germany	TRUE	3	4	0	1	0	0	0	7	3	4	7	0.428571
2068	Streptopelia turtur	Turtle dove	Europe	Germany	TRUE	5	8	0	5	0	0	0	13	5	8	13	0.384615
2069	Streptopelia turtur	Turtle dove	Europe	Germany	TRUE	1	1	0	0	0	0	0	2	1	1	2	0.5
2070	Streptopelia turtur	Turtle dove	Europe	Germany	TRUE	3	1	0	0	0	0	0	4	3	1	4	0.75
2071	Streptopelia turtur	Turtle dove	Europe	Germany	TRUE	1	0	0	0	0	0	0	1	1	0	1	1
2072	Streptopelia turtur	Turtle dove	Europe	Germany	TRUE	2	1	1	0	0	0	0	4	2	1	3	0.666667
2073	Streptopelia turtur	Turtle dove	Europe	Germany	TRUE	3	2	0	0	0	0	0	5	3	2	5	0.6
2074	Streptopelia turtur	Turtle dove	Europe	Germany	TRUE	0	4	0	0	0	0	0	4	0	4	4	0
2076	Streptopelia turtur	Turtle dove	Europe	Netherlands	TRUE	2	2	0	0	0	0	0	4	2	2	4	0.5
2077	Streptopelia turtur	Turtle dove	Europe	Netherlands	TRUE	0	1	1	1	0	0	0	2	0	1	1	0
2078	Streptopelia turtur	Turtle dove	Europe	Netherlands	TRUE	4	0	0	0	0	0	0	4	4	0	4	1
2079	Streptopelia turtur	Turtle dove	Europe	Netherlands	TRUE	5	5	1	4	0	0	0	11	5	5	10	0.5
2080	Streptopelia turtur	Turtle dove	Europe	Netherlands	TRUE	4	3	0	0	0	0	0	7	4	3	7	0.571429
2081	Streptopelia turtur	Turtle dove	Europe	Poland	TRUE	2	1	1	3	0	0	0	4	2	1	3	0.666667
2082	Streptopelia turtur	Turtle dove	Europe	Poland	TRUE	1	0	0	0	0	0	0	1	1	0	1	1
2085	Streptopelia turtur	Turtle dove	Europe	Spain	TRUE	5	6	0	2	0	0	0	11	5	6	11	0.454545
2086	Streptopelia turtur	Turtle dove	Europe	United Kingdom	TRUE	0	1	1	0	0	0	0	2	0	1	1	0
2087	Streptopelia turtur	Turtle dove	Europe	United Kingdom	TRUE	2	2	2	2	0	0	0	6	2	2	4	0.5
2088	Streptopelia turtur	Turtle dove	Europe	United Kingdom	TRUE	5	6	0	6	0	0	0	11	5	6	11	0.454545
2089	Streptopelia turtur	Turtle dove	Europe	United Kingdom	TRUE	1	1	0	0	0	0	0	2	1	1	2	0.5
2090	Streptopelia turtur	Turtle dove	Europe	United Kingdom	TRUE	2	5	0	0	0	0	0	7	2	5	7	0.285714
2091	Streptopelia turtur	Turtle dove	North America	United States	FALSE	1	2	0	0	0	0	0	3	1	2	3	0.333333
2092	Streptopelia turtur turtur	Turtle dove	Europe	Czech Republic	TRUE	1	0	0	0	0	0	0	1	1	0	1	1
2093	Streptopelia turtur turtur	Turtle dove	Europe	Czech Republic	TRUE	0	1	0	0	0	0	0	1	0	1	1	0
2094	Streptopelia turtur turtur	Turtle dove	Europe	Czech Republic	TRUE	2	1	0	0	0	0	0	3	2	1	3	0.666667
2095	Streptopelia turtur turtur	Turtle dove	Europe	Germany	TRUE	1	0	0	0	0	0	0	1	1	0	1	1
2096	Streptopelia turtur turtur	Turtle dove	Europe	Germany	TRUE	1	1	0	0	0	0	0	2	1	1	2	0.5
2097	Streptopelia turtur turtur	Turtle dove	Europe	Germany	TRUE	1	2	0	0	0	0	0	3	1	2	3	0.333333
2098	Streptopelia turtur turtur	Turtle dove	Europe	Germany	TRUE	0	1	0	0	0	0	0	1	0	1	1	0
2099	Streptopelia turtur turtur	Turtle dove	Europe	Poland	TRUE	0	2	0	0	0	0	0	2	0	2	2	0
2100	Streptopelia dusumieri	Philippine collared-dove	North America	United States	FALSE	1	0	0	0	0	0	0	1	1	0	1	1
2103	Treron australis	Green pigeon	North America	United States	FALSE	2	0	0	0	0	0	0	2	2	0	2	1
2104	Treron calvus	Reichenow's pigeon	Africa	South Africa	FALSE	1	0	0	0	0	0	0	1	1	0	1	1
2105	Treron calvus	Reichenow's pigeon	Asia	Singapore	FALSE	3	4	0	0	0	0	0	7	3	4	7	0.428571
2107	Treron calvus	Reichenow's pigeon	Europe	Czech Republic	FALSE	1	0	2	0	0	0	0	3	1	0	1	1
2108	Treron calvus	Reichenow's pigeon	Europe	France	FALSE	3	1	0	1	0	0	0	4	3	1	4	0.75
2109	Treron calvus	Reichenow's pigeon	Europe	Greece	FALSE	2	1	4	1	0	0	0	7	2	1	3	0.666667
2110	Treron calvus	Reichenow's pigeon	Europe	Slovakia	FALSE	1	1	0	0	0	0	0	2	1	1	2	0.5
2111	Treron calvus calvus	African green pigeon	Europe	Spain	FALSE	1	2	0	0	0	0	0	3	1	2	3	0.333333
2112	Treron calvus sharpei	African green pigeon	Europe	Germany	FALSE	1	1	1	1	0	0	0	3	1	1	2	0.5
2113	Treron curvirostra	Thick-billed green-pigeon	Asia	Singapore	TRUE	1	0	0	0	0	0	0	1	1	0	1	1
2116	Treron curvirostra	Thick-billed green-pigeon	North America	United States	FALSE	1	0	0	0	0	0	0	1	1	0	1	1
2117	Treron sieboldii	White-bellied pigeon	Asia	Japan	TRUE	1	0	1	0	0	0	0	2	1	0	1	1
2118	Treron sieboldii	White-bellied pigeon	Asia	Japan	TRUE	1	2	0	0	0	0	0	3	1	2	3	0.333333
2119	Treron sieboldii	White-bellied pigeon	Asia	Japan	TRUE	1	0	0	0	0	0	0	1	1	0	1	1
2120	Treron vernans	Pink-necked pigeon	Asia	Hong Kong	FALSE	5	2	0	0	0	0	0	7	5	2	7	0.714286
2121	Treron vernans	Pink-necked pigeon	Asia	Singapore	TRUE	0	1	0	0	0	0	0	1	0	1	1	0
2122	Treron vernans	Pink-necked pigeon	Asia	Singapore	TRUE	0	1	0	0	0	0	0	1	0	1	1	0
2123	Treron vernans	Pink-necked pigeon	Europe	Czech Republic	FALSE	2	3	0	1	0	0	0	5	2	3	5	0.4
2124	Treron vernans	Pink-necked pigeon	Europe	Czech Republic	FALSE	1	1	0	0	0	0	0	2	1	1	2	0.5
2125	Treron vernans	Pink-necked pigeon	Europe	France	FALSE	1	0	0	0	0	0	0	1	1	0	1	1
2126	Treron vernans	Pink-necked pigeon	Europe	France	FALSE	2	2	0	0	0	0	0	4	2	2	4	0.5
2127	Treron vernans	Pink-necked pigeon	Europe	Germany	FALSE	1	2	0	0	0	0	0	3	1	2	3	0.333333
2128	Treron vernans	Pink-necked pigeon	Europe	Germany	FALSE	1	3	0	2	0	0	0	4	1	3	4	0.25
2129	Treron vernans	Pink-necked pigeon	Europe	Germany	FALSE	1	0	0	0	0	0	0	1	1	0	1	1
2130	Treron vernans	Pink-necked pigeon	Europe	Germany	FALSE	3	2	0	0	0	0	0	5	3	2	5	0.6
2131	Treron vernans	Pink-necked pigeon	Europe	Germany	FALSE	1	1	0	0	0	0	0	2	1	1	2	0.5
2132	Treron vernans	Pink-necked pigeon	Europe	Germany	FALSE	1	3	0	0	0	0	0	4	1	3	4	0.25
2133	Treron vernans	Pink-necked pigeon	Europe	Netherlands	FALSE	1	0	0	0	0	0	0	1	1	0	1	1
2134	Treron vernans	Pink-necked pigeon	Europe	Netherlands	FALSE	1	0	0	0	0	0	0	1	1	0	1	1
2135	Treron vernans	Pink-necked pigeon	Europe	Poland	FALSE	1	1	0	0	0	0	0	2	1	1	2	0.5
2136	Treron vernans	Pink-necked pigeon	Europe	Slovakia	FALSE	1	2	0	0	0	0	0	3	1	2	3	0.333333
2137	Treron vernans	Pink-necked pigeon	Europe	Spain	FALSE	1	1	0	0	0	0	0	2	1	1	2	0.5
2138	Treron vernans	Pink-necked pigeon	Europe	United Kingdom	FALSE	1	1	0	0	0	0	0	2	1	1	2	0.5
2139	Treron vernans	Pink-necked pigeon	Europe	United Kingdom	FALSE	1	0	0	0	0	0	0	1	1	0	1	1
2141	Treron vernans	Pink-necked pigeon	North America	United States	FALSE	1	0	0	0	0	0	0	1	1	0	1	1
2142	Treron vernans	Pink-necked pigeon	North America	United States	FALSE	4	2	0	0	0	0	0	6	4	2	6	0.666667
2143	Treron vernans adina	Pink-necked green pigeon	North America	United States	FALSE	0	1	0	0	0	0	0	1	0	1	1	0
2144	Treron vernans griseicapilla	Pink-necked green pigeon	Asia	Singapore	TRUE	1	0	0	0	0	0	0	1	1	0	1	1
2145	Treron waalia	Bruce's green pigeon	Africa	South Africa	FALSE	1	1	0	0	0	0	0	2	1	1	2	0.5
2146	Treron waalia	Bruce's green pigeon	Asia	Singapore	FALSE	6	4	2	1	0	0	0	12	6	4	10	0.6
2147	Treron waalia	Bruce's green pigeon	Asia	United Arab Emirates	FALSE	5	2	0	0	0	0	0	7	5	2	7	0.714286
2148	Treron waalia	Bruce's green pigeon	Asia	United Arab Emirates	FALSE	2	0	3	0	0	0	0	5	2	0	2	1
2149	Treron waalia	Bruce's green pigeon	Europe	Czech Republic	FALSE	3	1	0	0	0	0	0	4	3	1	4	0.75
2150	Treron waalia	Bruce's green pigeon	Europe	France	FALSE	2	0	0	0	0	0	0	2	2	0	2	1
2151	Treron waalia	Bruce's green pigeon	Europe	Germany	FALSE	0	1	0	0	0	0	0	1	0	1	1	0
2152	Treron waalia	Bruce's green pigeon	Europe	Germany	FALSE	2	2	0	0	0	0	0	4	2	2	4	0.5
2153	Treron waalia	Bruce's green pigeon	Europe	Germany	FALSE	0	3	3	0	0	0	0	6	0	3	3	0
2154	Treron waalia	Bruce's green pigeon	Europe	Netherlands	FALSE	1	0	0	0	0	0	0	1	1	0	1	1
2155	Treron waalia	Bruce's green pigeon	Europe	Poland	FALSE	1	1	0	0	0	0	0	2	1	1	2	0.5
2156	Treron waalia	Bruce's green pigeon	Europe	Poland	FALSE	1	1	0	0	0	0	0	2	1	1	2	0.5
2157	Treron waalia	Bruce's green pigeon	Europe	Russian Federation	FALSE	0	1	0	0	0	0	0	1	0	1	1	0
2158	Treron waalia	Bruce's green pigeon	Europe	Russian Federation	FALSE	0	1	0	0	0	0	0	1	0	1	1	0
2160	Treron waalia	Bruce's green pigeon	Europe	Spain	FALSE	2	2	0	0	0	0	0	4	2	2	4	0.5
2161	Treron waalia	Bruce's green pigeon	Europe	United Kingdom	FALSE	1	0	0	0	0	0	0	1	1	0	1	1
2162	Treron waalia	Bruce's green pigeon	Europe	United Kingdom	FALSE	1	1	0	0	0	0	0	2	1	1	2	0.5
2163	Treron waalia	Bruce's green pigeon	Europe	United Kingdom	FALSE	1	1	0	0	0	0	0	2	1	1	2	0.5
2164	Treron waalia	Bruce's green pigeon	North America	United States	FALSE	0	1	0	0	0	0	0	1	0	1	1	0
2165	Treron waalia	Bruce's green pigeon	North America	United States	FALSE	1	0	0	0	0	0	0	1	1	0	1	1
2166	Treron waalia	Bruce's green pigeon	North America	United States	FALSE	2	3	0	1	0	0	0	5	2	3	5	0.4
2167	Treron waalia	Bruce's green pigeon	North America	United States	FALSE	10	6	0	5	0	0	0	16	10	6	16	0.625
2168	Treron waalia	Bruce's green pigeon	North America	United States	FALSE	1	3	0	0	0	0	0	4	1	3	4	0.25
2169	Treron waalia	Bruce's green pigeon	North America	United States	FALSE	1	1	0	0	0	0	0	2	1	1	2	0.5
2170	Treron waalia	Bruce's green pigeon	North America	United States	FALSE	1	1	0	1	0	0	0	2	1	1	2	0.5
2171	Treron waalia	Bruce's green pigeon	North America	United States	FALSE	4	1	3	2	0	0	0	8	4	1	5	0.8
2172	Treron waalia	Bruce's green pigeon	North America	United States	FALSE	5	5	1	0	0	0	0	11	5	5	10	0.5
2173	Treron waalia	Bruce's green pigeon	North America	United States	FALSE	9	4	1	1	0	0	0	14	9	4	13	0.692308
2174	Treron waalia	Bruce's green pigeon	North America	United States	FALSE	1	1	0	0	0	0	0	2	1	1	2	0.5
2175	Trugon terrestris	Thick-billed ground dove	Europe	Germany	FALSE	1	0	0	0	0	0	0	1	1	0	1	1
2176	Turtur afer	Blue-spotted wood dove	Asia	Singapore	FALSE	1	0	0	0	0	0	0	1	1	0	1	1
2178	Turtur afer	Blue-spotted wood dove	North America	United States	FALSE	2	2	2	0	0	0	0	6	2	2	4	0.5
2179	Turtur brehmeri	Blue-headed dove	Asia	Singapore	FALSE	2	1	0	0	0	0	0	3	2	1	3	0.666667
2180	Turtur brehmeri	Blue-headed dove	Asia	Singapore	FALSE	1	1	0	0	0	0	0	2	1	1	2	0.5
2182	Turtur brehmeri	Blue-headed dove	Europe	France	FALSE	1	0	1	0	0	0	0	2	1	0	1	1
2183	Turtur brehmeri	Blue-headed dove	North America	United States	FALSE	2	0	0	0	0	0	0	2	2	0	2	1
2184	Turtur brehmeri	Blue-headed dove	North America	United States	FALSE	2	0	0	0	0	0	0	2	2	0	2	1
2185	Turtur brehmeri	Blue-headed dove	North America	United States	FALSE	4	2	0	1	0	0	0	6	4	2	6	0.666667
2186	Turtur brehmeri	Blue-headed dove	North America	United States	FALSE	2	1	0	0	0	0	0	3	2	1	3	0.666667
2187	Turtur brehmeri	Blue-headed dove	North America	United States	FALSE	2	1	0	0	0	0	0	3	2	1	3	0.666667
2188	Turtur brehmeri	Blue-headed dove	North America	United States	FALSE	3	2	0	0	0	0	0	5	3	2	5	0.6
2189	Turtur brehmeri	Blue-headed dove	North America	United States	FALSE	9	6	0	2	0	0	0	15	9	6	15	0.6
2191	Turtur chalcospilos	Emerald-spotted wood dove	Europe	France	FALSE	1	1	0	0	0	0	0	2	1	1	2	0.5
2192	Turtur chalcospilos	Emerald-spotted wood dove	North America	United States	FALSE	1	0	0	0	0	0	0	1	1	0	1	1
2193	Turtur chalcospilos	Emerald-spotted wood dove	North America	United States	FALSE	1	0	0	0	0	0	0	1	1	0	1	1
2194	Turtur tympanistria	Tambourine dove	Africa	South Africa	TRUE	2	2	3	0	0	0	0	7	2	2	4	0.5
2195	Turtur tympanistria	Tambourine dove	Asia	Japan	FALSE	2	2	0	0	0	0	0	4	2	2	4	0.5
2196	Turtur tympanistria	Tambourine dove	Asia	Singapore	FALSE	9	6	5	5	0	0	0	20	9	6	15	0.6
2197	Turtur tympanistria	Tambourine dove	Europe	Denmark	FALSE	1	1	0	0	0	0	0	2	1	1	2	0.5
2198	Turtur tympanistria	Tambourine dove	Europe	Germany	FALSE	1	1	0	0	0	0	0	2	1	1	2	0.5
2200	Turtur tympanistria	Tambourine dove	Europe	United Kingdom	FALSE	4	3	0	2	0	0	0	7	4	3	7	0.571429
2202	Turtur tympanistria	Tambourine dove	North America	United States	FALSE	3	2	0	0	0	0	0	5	3	2	5	0.6
2203	Turtur tympanistria	Tambourine dove	North America	United States	FALSE	0	1	0	0	0	0	0	1	0	1	1	0
2204	Turtur tympanistria	Tambourine dove	North America	United States	FALSE	8	2	0	0	1	0	0	11	9	2	11	0.818182
2205	Turtur tympanistria	Tambourine dove	North America	United States	FALSE	0	1	0	0	0	0	0	1	0	1	1	0
2206	Turtur tympanistria	Tambourine dove	North America	United States	FALSE	3	7	4	4	0	0	0	14	3	7	10	0.3
2207	Turtur tympanistria	Tambourine dove	North America	United States	FALSE	20	11	2	2	0	0	0	33	20	11	31	0.645161
2208	Turtur tympanistria	Tambourine dove	North America	United States	FALSE	0	1	0	0	0	0	0	1	0	1	1	0
2210	Zenaida asiatica	White-winged dove	Europe	Netherlands	FALSE	14	15	0	4	0	0	0	29	14	15	29	0.482759
2213	Zenaida asiatica	White-winged dove	Europe	Switzerland	FALSE	5	6	2	0	0	0	0	13	5	6	11	0.454545
2219	Zenaida asiatica	White-winged dove	North America	United States	FALSE	1	0	0	0	0	0	0	1	1	0	1	1
2221	Zenaida asiatica	White-winged dove	North America	United States	FALSE	3	2	0	0	0	0	0	5	3	2	5	0.6
2223	Zenaida asiatica	White-winged dove	North America	United States	FALSE	0	1	0	0	0	0	0	1	0	1	1	0
2224	Zenaida asiatica	White-winged dove	North America	United States	FALSE	5	7	6	0	0	0	7	25	5	7	12	0.416667
2225	Zenaida asiatica	White-winged dove	North America	United States	FALSE	2	0	1	0	0	0	0	3	2	0	2	1
2226	Zenaida asiatica	White-winged dove	North America	United States	FALSE	2	0	0	0	0	0	0	2	2	0	2	1
2228	Zenaida auriculata	Eared dove	Asia	Singapore	FALSE	0	1	3	0	1	2	25	32	1	3	4	0.25
2229	Zenaida auriculata	Eared dove	Europe	Czech Republic	FALSE	0	1	0	0	0	0	0	1	0	1	1	0
2232	Zenaida auriculata	Eared dove	South America	Brazil	TRUE	1	0	0	0	0	0	0	1	1	0	1	1
2235	Zenaida graysoni	Socorro dove	Asia	Singapore	FALSE	2	0	0	0	0	0	0	2	2	0	2	1
2236	Zenaida graysoni	Socorro dove	Europe	Austria	FALSE	1	2	0	0	0	0	0	3	1	2	3	0.333333
2237	Zenaida graysoni	Socorro dove	Europe	Croatia	FALSE	3	0	0	0	0	0	0	3	3	0	3	1
2238	Zenaida graysoni	Socorro dove	Europe	Czech Republic	FALSE	2	1	0	0	0	0	0	3	2	1	3	0.666667
2239	Zenaida graysoni	Socorro dove	Europe	Czech Republic	FALSE	2	0	0	0	0	0	0	2	2	0	2	1
2240	Zenaida graysoni	Socorro dove	Europe	France	FALSE	1	0	0	0	0	0	0	1	1	0	1	1
2241	Zenaida graysoni	Socorro dove	Europe	Germany	FALSE	1	0	0	0	0	0	0	1	1	0	1	1
2242	Zenaida graysoni	Socorro dove	Europe	Germany	FALSE	1	0	0	0	0	0	0	1	1	0	1	1
2243	Zenaida graysoni	Socorro dove	Europe	Germany	FALSE	2	0	0	0	0	0	0	2	2	0	2	1
2244	Zenaida graysoni	Socorro dove	Europe	Germany	FALSE	1	2	0	0	0	0	0	3	1	2	3	0.333333
2245	Zenaida graysoni	Socorro dove	Europe	Germany	FALSE	1	0	0	0	0	0	0	1	1	0	1	1
2246	Zenaida graysoni	Socorro dove	Europe	Germany	FALSE	1	1	0	0	0	0	0	2	1	1	2	0.5
2247	Zenaida graysoni	Socorro dove	Europe	Germany	FALSE	1	1	0	0	0	0	0	2	1	1	2	0.5
2248	Zenaida graysoni	Socorro dove	Europe	Germany	FALSE	0	1	0	0	0	0	0	1	0	1	1	0
2249	Zenaida graysoni	Socorro dove	Europe	Germany	FALSE	1	1	0	0	0	0	0	2	1	1	2	0.5
2250	Zenaida graysoni	Socorro dove	Europe	Germany	FALSE	1	0	0	0	0	0	0	1	1	0	1	1
2251	Zenaida graysoni	Socorro dove	Europe	Germany	FALSE	1	0	0	0	0	0	0	1	1	0	1	1
2252	Zenaida graysoni	Socorro dove	Europe	Hungary	FALSE	1	0	0	0	0	0	0	1	1	0	1	1
2253	Zenaida graysoni	Socorro dove	Europe	Netherlands	FALSE	1	1	0	0	0	0	0	2	1	1	2	0.5
2254	Zenaida graysoni	Socorro dove	Europe	Netherlands	FALSE	5	5	0	5	0	0	0	10	5	5	10	0.5
2255	Zenaida graysoni	Socorro dove	Europe	Poland	FALSE	2	0	0	0	0	0	0	2	2	0	2	1
2256	Zenaida graysoni	Socorro dove	Europe	Portugal	FALSE	2	0	0	0	0	0	0	2	2	0	2	1
2257	Zenaida graysoni	Socorro dove	Europe	Portugal	FALSE	2	1	1	1	0	0	0	4	2	1	3	0.666667
2258	Zenaida graysoni	Socorro dove	Europe	Spain	FALSE	1	1	0	0	0	0	0	2	1	1	2	0.5
2259	Zenaida graysoni	Socorro dove	Europe	Spain	FALSE	2	1	0	0	0	0	0	3	2	1	3	0.666667
2260	Zenaida graysoni	Socorro dove	Europe	Switzerland	FALSE	3	3	0	3	0	0	0	6	3	3	6	0.5
2261	Zenaida graysoni	Socorro dove	Europe	United Kingdom	FALSE	1	1	0	0	0	0	0	2	1	1	2	0.5
2262	Zenaida graysoni	Socorro dove	Europe	United Kingdom	FALSE	1	1	0	0	0	0	0	2	1	1	2	0.5
2263	Zenaida graysoni	Socorro dove	Europe	United Kingdom	FALSE	2	2	0	0	0	0	0	4	2	2	4	0.5
2264	Zenaida graysoni	Socorro dove	Europe	United Kingdom	FALSE	4	1	0	1	0	0	0	5	4	1	5	0.8
2265	Zenaida graysoni	Socorro dove	Europe	United Kingdom	FALSE	2	2	0	0	0	0	0	4	2	2	4	0.5
2266	Zenaida graysoni	Socorro dove	Europe	United Kingdom	FALSE	1	1	0	0	0	0	0	2	1	1	2	0.5
2267	Zenaida graysoni	Socorro dove	Europe	United Kingdom	FALSE	1	1	0	0	0	0	0	2	1	1	2	0.5
2268	Zenaida graysoni	Socorro dove	North America	Mexico	FALSE	10	2	21	1	0	0	0	33	10	2	12	0.833333
2269	Zenaida graysoni	Socorro dove	North America	United States	FALSE	14	7	0	2	0	0	0	21	14	7	21	0.666667
2270	Zenaida graysoni	Socorro dove	North America	United States	FALSE	1	3	0	0	0	0	0	4	1	3	4	0.25
2271	Zenaida graysoni	Socorro dove	North America	United States	FALSE	1	0	0	0	0	0	0	1	1	0	1	1
2272	Zenaida graysoni	Socorro dove	North America	United States	FALSE	4	2	0	0	0	0	0	6	4	2	6	0.666667
2273	Zenaida graysoni	Socorro dove	North America	United States	FALSE	5	4	1	6	0	0	0	10	5	4	9	0.555556
2274	Zenaida graysoni	Socorro dove	North America	United States	FALSE	1	0	0	0	0	0	0	1	1	0	1	1
2275	Zenaida macroura	Mourning dove	Europe	Germany	FALSE	1	1	0	0	0	0	0	2	1	1	2	0.5
2276	Zenaida macroura	Mourning dove	North America	Canada	TRUE	0	1	0	0	0	0	0	1	0	1	1	0
2278	Zenaida macroura	Mourning dove	North America	United States	TRUE	3	1	0	0	0	0	0	4	3	1	4	0.75
2283	Zenaida macroura	Mourning dove	North America	United States	TRUE	1	0	1	0	0	0	0	2	1	0	1	1
2287	Zenaida macroura	Mourning dove	North America	United States	TRUE	1	0	0	0	0	0	0	1	1	0	1	1
2290	Zenaida macroura	Mourning dove	North America	United States	TRUE	1	0	0	0	0	0	0	1	1	0	1	1
2291	Zenaida macroura	Mourning dove	North America	United States	TRUE	0	4	0	0	0	0	0	4	0	4	4	0
2292	Zenaida macroura marginella	Mourning dove	North America	Canada	TRUE	2	0	0	0	0	0	0	2	2	0	2	1
2293	Zenaida macroura marginella	Mourning dove	North America	United States	TRUE	0	1	0	0	0	0	0	1	0	1	1	0
2296	Spilopelia senegalensis	Laughing dove	Asia	India	TRUE	0	0	0	0	1	1	0	2	1	1	2	0.5
2297	Spilopelia senegalensis	Laughing dove	Asia	Singapore	FALSE	20	39	37	0	0	0	0	96	20	39	59	0.338983
2299	Spilopelia senegalensis	Laughing dove	Europe	Belgium	FALSE	34	6	0	3	0	0	0	40	34	6	40	0.85
2302	Spilopelia senegalensis	Laughing dove	Europe	France	FALSE	9	17	7	16	0	0	0	33	9	17	26	0.346154
2306	Spilopelia senegalensis	Laughing dove	Europe	Germany	FALSE	5	5	12	2	0	0	0	22	5	5	10	0.5
2307	Spilopelia senegalensis	Laughing dove	Europe	Germany	FALSE	1	0	1	0	4	4	5	15	5	4	9	0.555556
2308	Spilopelia senegalensis	Laughing dove	Europe	Hungary	FALSE	2	1	0	0	0	0	15	18	2	1	3	0.666667
2311	Spilopelia senegalensis	Laughing dove	Europe	Netherlands	FALSE	2	5	1	0	0	0	0	8	2	5	7	0.285714
2312	Spilopelia senegalensis	Laughing dove	Europe	Netherlands	FALSE	0	1	3	3	0	0	0	4	0	1	1	0
2313	Spilopelia senegalensis	Laughing dove	Europe	Netherlands	FALSE	12	16	101	106	0	0	0	129	12	16	28	0.428571
2315	Spilopelia senegalensis	Laughing dove	Europe	Poland	FALSE	0	0	0	0	2	3	3	8	2	3	5	0.4
2316	Spilopelia senegalensis	Laughing dove	Europe	Russian Federation	FALSE	1	1	0	0	0	0	0	2	1	1	2	0.5
2317	Spilopelia senegalensis	Laughing dove	Europe	Spain	FALSE	1	1	0	0	0	0	0	2	1	1	2	0.5
2318	Spilopelia senegalensis senegalensis	Laughing dove	Europe	Czech Republic	FALSE	0	1	0	0	0	0	0	1	0	1	1	0
2320	Spilopelia senegalensis senegalensis	Laughing dove	Europe	Czech Republic	FALSE	3	5	0	0	0	0	0	8	3	5	8	0.375
2321	Spilopelia senegalensis senegalensis	Laughing dove	Europe	Czech Republic	FALSE	2	1	0	0	0	0	0	3	2	1	3	0.666667
2322	Spilopelia senegalensis senegalensis	Laughing dove	North America	United States	FALSE	4	2	0	0	0	0	0	6	4	2	6	0.666667
2323	Spilopelia senegalensis senegalensis	Laughing dove	North America	United States	FALSE	11	2	0	0	0	0	0	13	11	2	13	0.846154
2324	Spilopelia senegalensis senegalensis	Laughing dove	North America	United States	FALSE	50	67	5	2	0	0	0	122	50	67	117	0.42735
2326	Spilopelia chinensis	Eastern spotted dove	Asia	India	FALSE	0	0	0	0	1	0	0	1	1	0	1	1
2329	Spilopelia chinensis	Eastern spotted dove	Europe	Germany	FALSE	2	0	0	0	0	1	0	3	2	1	3	0.666667
2330	Spilopelia chinensis	Eastern spotted dove	Europe	Germany	FALSE	2	2	0	0	0	0	0	4	2	2	4	0.5
2331	Spilopelia chinensis	Eastern spotted dove	Europe	Germany	FALSE	4	4	17	0	0	0	0	25	4	4	8	0.5
2332	Spilopelia chinensis	Eastern spotted dove	Europe	Hungary	FALSE	0	0	0	0	1	1	0	2	1	1	2	0.5
2334	Spilopelia chinensis	Eastern spotted dove	Europe	Spain	FALSE	1	1	0	0	0	0	0	2	1	1	2	0.5
2335	Spilopelia chinensis	Eastern spotted dove	North America	United States	FALSE	1	0	0	0	0	0	0	1	1	0	1	1
2336	Spilopelia chinensis	Eastern spotted dove	North America	United States	FALSE	2	4	0	0	0	0	0	6	2	4	6	0.333333
2337	Spilopelia chinensis	Eastern spotted dove	North America	United States	FALSE	2	4	1	0	0	0	0	7	2	4	6	0.333333
2340	Spilopelia chinensis chinensis	Eastern spotted dove	Europe	Czech Republic	FALSE	14	7	0	6	0	0	0	21	14	7	21	0.666667
2341	Spilopelia chinensis chinensis	Eastern spotted dove	Europe	Czech Republic	FALSE	3	2	0	0	0	0	0	5	3	2	5	0.6
2342	Spilopelia chinensis chinensis	Eastern spotted dove	Europe	Czech Republic	FALSE	0	1	0	0	0	0	0	1	0	1	1	0
2343	Spilopelia chinensis chinensis	Eastern spotted dove	Europe	Germany	FALSE	2	2	0	0	0	0	0	4	2	2	4	0.5
2344	Spilopelia chinensis chinensis	Eastern spotted dove	Europe	Poland	FALSE	1	1	0	0	0	0	0	2	1	1	2	0.5
2345	Megaloprepia magnifica	Wompoo fruit-dove	Australia (Oceania)	Australia	TRUE	3	3	0	0	0	0	0	6	3	3	6	0.5
2346	Megaloprepia magnifica	Wompoo fruit-dove	Europe	Germany	FALSE	2	2	0	0	0	0	0	4	2	2	4	0.5
2347	Megaloprepia magnifica	Wompoo fruit-dove	Europe	Germany	FALSE	1	1	0	0	0	0	0	2	1	1	2	0.5
2348	Megaloprepia magnifica	Wompoo fruit-dove	North America	United States	FALSE	2	2	0	0	0	0	0	4	2	2	4	0.5
2349	Megaloprepia magnifica	Wompoo fruit-dove	North America	United States	FALSE	1	0	0	0	0	0	0	1	1	0	1	1
2350	Megaloprepia magnifica	Wompoo fruit-dove	North America	United States	FALSE	1	0	0	0	0	0	0	1	1	0	1	1
2351	Megaloprepia magnifica	Wompoo fruit-dove	North America	United States	FALSE	5	2	0	1	0	0	0	7	5	2	7	0.714286
2352	Megaloprepia magnifica	Wompoo fruit-dove	North America	United States	FALSE	1	1	0	0	0	0	0	2	1	1	2	0.5
2353	Megaloprepia magnifica puella	Wompoo fruit-dove	Asia	Indonesia	TRUE	2	4	0	0	0	0	0	6	2	4	6	0.333333
2354	Megaloprepia magnifica magnifica	Wompoo fruit-dove	Australia (Oceania)	Australia	TRUE	1	0	0	0	0	0	0	1	1	0	1	1
2355	Megaloprepia magnifica magnifica	Wompoo fruit-dove	Australia (Oceania)	Australia	TRUE	9	3	2	4	0	0	0	14	9	3	12	0.75
2356	Ramphiculus leclancheri	Black-chinned fruit-dove	Asia	United Arab Emirates	FALSE	0	0	0	0	8	8	0	16	8	8	16	0.5
2357	Ramphiculus leclancheri	Black-chinned fruit-dove	Europe	Germany	FALSE	3	2	0	2	0	0	0	5	3	2	5	0.6
2358	Ramphiculus leclancheri leclancheri	Black-chinned fruit-dove	North America	United States	FALSE	1	1	0	0	0	0	0	2	1	1	2	0.5
2359	Ramphiculus jambu	Jambu fruit-dove	Asia	Singapore	TRUE	4	0	0	0	0	0	0	4	4	0	4	1
2361	Ramphiculus jambu	Jambu fruit-dove	Europe	Germany	FALSE	2	1	0	0	0	0	0	3	2	1	3	0.666667
2362	Ramphiculus jambu	Jambu fruit-dove	North America	United States	FALSE	2	2	0	1	0	0	0	4	2	2	4	0.5
2363	Ramphiculus jambu	Jambu fruit-dove	North America	United States	FALSE	3	5	0	2	0	0	0	8	3	5	8	0.375
2364	Ramphiculus jambu	Jambu fruit-dove	North America	United States	FALSE	0	1	0	0	0	0	0	1	0	1	1	0
2365	Ramphiculus jambu	Jambu fruit-dove	North America	United States	FALSE	1	1	0	0	0	0	0	2	1	1	2	0.5
2366	Ramphiculus jambu	Jambu fruit-dove	North America	United States	FALSE	1	1	0	0	0	0	0	2	1	1	2	0.5
2367	Ramphiculus jambu	Jambu fruit-dove	North America	United States	FALSE	1	0	0	0	0	0	0	1	1	0	1	1
2368	Ramphiculus jambu	Jambu fruit-dove	North America	United States	FALSE	1	1	0	0	0	0	0	2	1	1	2	0.5
2369	Ramphiculus jambu	Jambu fruit-dove	North America	United States	FALSE	2	0	0	0	0	0	0	2	2	0	2	1
2370	Ramphiculus jambu	Jambu fruit-dove	North America	United States	FALSE	0	2	0	0	0	0	0	2	0	2	2	0
2371	Ramphiculus jambu	Jambu fruit-dove	North America	United States	FALSE	3	2	0	0	0	0	0	5	3	2	5	0.6
2372	Ramphiculus occipitalis	Yellow-breasted fruit-dove	Asia	Singapore	FALSE	1	1	0	0	0	0	0	2	1	1	2	0.5
2373	Ramphiculus occipitalis	Yellow-breasted fruit-dove	Asia	Singapore	FALSE	1	1	0	0	0	0	0	2	1	1	2	0.5
2374	Ramphiculus occipitalis	Yellow-breasted fruit-dove	Asia	United Arab Emirates	FALSE	0	0	0	0	5	5	0	10	5	5	10	0.5
2375	Ramphiculus occipitalis	Yellow-breasted fruit-dove	Europe	Germany	FALSE	1	1	0	0	0	0	0	2	1	1	2	0.5
2376	Ramphiculus occipitalis	Yellow-breasted fruit-dove	Europe	Germany	FALSE	4	3	1	0	0	0	0	8	4	3	7	0.571429
2377	Ramphiculus occipitalis	Yellow-breasted fruit-dove	Europe	Netherlands	FALSE	1	1	0	0	0	0	0	2	1	1	2	0.5
2378	Ramphiculus occipitalis	Yellow-breasted fruit-dove	Europe	Poland	FALSE	2	0	0	0	0	0	0	2	2	0	2	1
2379	Alopecoenas xanthonurus	White-throated ground-dove	North America	United States	FALSE	0	1	0	0	0	0	0	1	0	1	1	0
2380	Alopecoenas xanthonurus	White-throated ground-dove	North America	United States	FALSE	1	1	0	0	0	0	0	2	1	1	2	0.5
2381	Alopecoenas xanthonurus	White-throated ground-dove	North America	United States	FALSE	1	0	0	0	0	0	0	1	1	0	1	1
2382	Alopecoenas xanthonurus	White-throated ground-dove	North America	United States	FALSE	1	1	0	0	0	0	0	2	1	1	2	0.5
2383	Alopecoenas xanthonurus	White-throated ground-dove	North America	United States	FALSE	1	0	0	0	0	0	0	1	1	0	1	1
2384	Alopecoenas xanthonurus	White-throated ground-dove	North America	United States	FALSE	2	1	0	0	0	0	0	3	2	1	3	0.666667
2385	Alopecoenas xanthonurus	White-throated ground-dove	North America	United States	FALSE	3	3	0	0	0	0	0	6	3	3	6	0.5
2386	Alopecoenas xanthonurus	White-throated ground-dove	North America	United States	FALSE	1	1	0	0	0	0	0	2	1	1	2	0.5
2387	Alopecoenas xanthonurus	White-throated ground-dove	North America	United States	FALSE	1	0	0	0	0	0	0	1	1	0	1	1
2388	Alopecoenas xanthonurus	White-throated ground-dove	North America	United States	FALSE	3	2	0	0	0	0	0	5	3	2	5	0.6
2389	Alopecoenas xanthonurus	White-throated ground-dove	North America	United States	FALSE	1	2	0	0	0	0	0	3	1	2	3	0.333333
2390	Alopecoenas xanthonurus	White-throated ground-dove	North America	United States	FALSE	2	3	0	1	0	0	0	5	2	3	5	0.4
2391	Alopecoenas xanthonurus	White-throated ground-dove	North America	United States	FALSE	2	0	0	0	0	0	0	2	2	0	2	1
2392	Alopecoenas xanthonurus	White-throated ground-dove	North America	United States	FALSE	5	5	6	2	0	0	0	16	5	5	10	0.5
2393	Alopecoenas xanthonurus	White-throated ground-dove	North America	United States	FALSE	2	2	0	0	0	0	0	4	2	2	4	0.5
2394	Alopecoenas sanctaecrucis	Santa cruz ground-dove	Asia	Singapore	FALSE	47	40	0	2	0	0	0	87	47	40	87	0.54023
2395	Alopecoenas sanctaecrucis	Santa cruz ground-dove	Asia	Singapore	FALSE	1	1	0	0	0	0	0	2	1	1	2	0.5
2396	Alopecoenas sanctaecrucis	Santa cruz ground-dove	Australia (Oceania)	Solomon Islands	TRUE	44	12	2	0	0	0	0	58	44	12	56	0.785714
2397	Alopecoenas jobiensis	White-breasted ground dove	Australia (Oceania)	Australia	FALSE	1	0	1	0	0	0	0	2	1	0	1	1
2398	Alopecoenas jobiensis	White-breasted ground dove	Australia (Oceania)	Australia	FALSE	4	2	2	2	0	0	0	8	4	2	6	0.666667
2401	Nesoenas picturatus	Madagascar turtle-dove	Asia	Singapore	FALSE	18	19	21	19	0	0	0	58	18	19	37	0.486486
2402	Nesoenas picturatus	Madagascar turtle-dove	Europe	Austria	FALSE	1	0	0	0	0	0	0	1	1	0	1	1
2403	Nesoenas picturatus	Madagascar turtle-dove	Europe	Croatia	FALSE	1	0	0	0	0	0	0	1	1	0	1	1
2404	Nesoenas picturatus	Madagascar turtle-dove	Europe	Czech Republic	FALSE	1	1	0	0	0	0	0	2	1	1	2	0.5
2405	Nesoenas picturatus	Madagascar turtle-dove	Europe	Denmark	FALSE	2	2	0	0	0	0	0	4	2	2	4	0.5
2406	Nesoenas picturatus	Madagascar turtle-dove	Europe	France	FALSE	1	1	0	0	0	0	0	2	1	1	2	0.5
2407	Nesoenas picturatus	Madagascar turtle-dove	Europe	Germany	FALSE	1	0	0	0	0	0	0	1	1	0	1	1
2408	Nesoenas picturatus	Madagascar turtle-dove	Europe	Germany	FALSE	3	3	0	0	0	0	0	6	3	3	6	0.5
2409	Nesoenas picturatus	Madagascar turtle-dove	Europe	Germany	FALSE	1	1	0	0	0	0	0	2	1	1	2	0.5
2411	Nesoenas picturatus	Madagascar turtle-dove	Europe	Poland	FALSE	1	2	4	0	0	0	0	7	1	2	3	0.333333
2412	Nesoenas picturatus	Madagascar turtle-dove	Europe	Poland	FALSE	2	0	0	0	0	0	0	2	2	0	2	1
2414	Nesoenas picturatus	Madagascar turtle-dove	Europe	Switzerland	FALSE	20	10	14	0	0	0	26	70	20	10	30	0.666667
2415	Nesoenas picturatus	Madagascar turtle-dove	Europe	United Kingdom	FALSE	1	0	0	0	0	0	0	1	1	0	1	1
2416	Nesoenas picturatus	Madagascar turtle-dove	Europe	United Kingdom	FALSE	1	0	0	0	0	0	0	1	1	0	1	1
2417	Nesoenas picturatus	Madagascar turtle-dove	North America	United States	FALSE	1	0	0	0	0	0	0	1	1	0	1	1
2418	Nesoenas picturatus	Madagascar turtle-dove	North America	United States	FALSE	2	1	8	0	0	0	0	11	2	1	3	0.666667
2420	Nesoenas mayeri	Pink pigeon	Asia	Singapore	FALSE	1	2	0	0	0	0	0	3	1	2	3	0.333333
2421	Nesoenas mayeri	Pink pigeon	Europe	Czech Republic	FALSE	1	1	0	0	0	0	0	2	1	1	2	0.5
2422	Nesoenas mayeri	Pink pigeon	Europe	Czech Republic	FALSE	0	2	1	0	0	0	0	3	0	2	2	0
2423	Nesoenas mayeri	Pink pigeon	Europe	France	FALSE	2	2	0	0	0	0	0	4	2	2	4	0.5
2424	Nesoenas mayeri	Pink pigeon	Europe	Germany	FALSE	1	1	0	0	0	0	0	2	1	1	2	0.5
2425	Nesoenas mayeri	Pink pigeon	Europe	Jersey	FALSE	19	13	2	3	0	0	0	34	19	13	32	0.59375
2426	Nesoenas mayeri	Pink pigeon	Europe	Poland	FALSE	0	1	0	0	0	0	0	1	0	1	1	0
2427	Nesoenas mayeri	Pink pigeon	Europe	Poland	FALSE	1	1	0	0	0	0	0	2	1	1	2	0.5
2428	Nesoenas mayeri	Pink pigeon	Europe	United Kingdom	FALSE	1	1	0	0	0	0	0	2	1	1	2	0.5
2429	Nesoenas mayeri	Pink pigeon	Europe	United Kingdom	FALSE	2	2	0	0	0	0	0	4	2	2	4	0.5
2430	Nesoenas mayeri	Pink pigeon	Europe	United Kingdom	FALSE	5	3	0	0	0	0	0	8	5	3	8	0.625
2431	Nesoenas mayeri	Pink pigeon	Europe	United Kingdom	FALSE	1	2	0	0	0	0	0	3	1	2	3	0.333333
2432	Nesoenas mayeri	Pink pigeon	Europe	United Kingdom	FALSE	1	1	0	0	0	0	0	2	1	1	2	0.5
2433	Nesoenas mayeri	Pink pigeon	Europe	United Kingdom	FALSE	3	2	0	3	0	0	0	5	3	2	5	0.6
2434	Nesoenas mayeri	Pink pigeon	Europe	United Kingdom	FALSE	2	0	0	0	0	0	0	2	2	0	2	1
2435	Nesoenas mayeri	Pink pigeon	Europe	United Kingdom	FALSE	0	1	0	0	0	0	0	1	0	1	1	0
2436	Nesoenas mayeri	Pink pigeon	Europe	United Kingdom	FALSE	1	1	0	0	0	0	0	2	1	1	2	0.5
2437	Nesoenas mayeri	Pink pigeon	North America	United States	FALSE	1	1	0	0	0	0	0	2	1	1	2	0.5
[truncated: 6 more rows]

## Sheet: Psittaci
Sort	Order	Family	Scientific Name	Geographical Region	Country	Range	Male	Female	Other	Births	Group Male	Group Female	Group Other	Total Count
1	Psittaciformes	Psittacidae	Psittacidae	North America	United States	-	1	0	0	0	0	0	0	1
2	Psittaciformes	Psittacidae	Psittacidae	South America	Brazil	-	1	1	0	0	0	0	0	2
3	Psittaciformes	Psittacidae	Loriinae	Asia	Israel	-	0	0	0	0	0	0	2	2
4	Psittaciformes	Psittacidae	Loriinae	North America	United States	-	2	1	1	0	0	0	0	4
5	Psittaciformes	Psittacidae	Loriinae	North America	United States	-	1	0	0	0	0	0	0	1
6	Psittaciformes	Psittacidae	Chalcopsitta	Europe	France	NEW GUINEA,INDONESIA	1	0	0	0	0	0	0	1
44	Psittaciformes	Psittacidae	Eos	North America	United States	INDONESIAN ISLANDS	0	0	2	0	0	0	0	2
52	Psittaciformes	Psittacidae	Eos rubra	Asia	Cyprus	INDONESIAN ISLANDS	0	0	2	0	0	0	0	2
53	Psittaciformes	Psittacidae	Eos rubra	Asia	Hong Kong	INDONESIAN ISLANDS	0	0	2	0	0	0	0	2
54	Psittaciformes	Psittacidae	Eos rubra	Asia	India	INDONESIAN ISLANDS	1	1	0	0	0	0	0	2
55	Psittaciformes	Psittacidae	Eos rubra	Asia	Malaysia	INDONESIAN ISLANDS	0	0	1	0	0	0	0	1
56	Psittaciformes	Psittacidae	Eos rubra	Europe	Austria	INDONESIAN ISLANDS	0	0	1	0	0	0	0	1
57	Psittaciformes	Psittacidae	Eos rubra	North America	United States	INDONESIAN ISLANDS	3	0	7	0	0	0	0	10
58	Psittaciformes	Psittacidae	Eos rubra rubra	Asia	Sri Lanka	Amboina,Saparua I Indonesia	1	1	1	0	0	0	0	3
59	Psittaciformes	Psittacidae	Eos rubra rubra	Europe	Denmark	Amboina,Saparua I Indonesia	1	1	0	0	0	0	0	2
60	Psittaciformes	Psittacidae	Eos rubra rubra	North America	United States	Amboina,Saparua I Indonesia	0	0	1	0	0	0	0	1
109	Psittaciformes	Psittacidae	Trichoglossus	Africa	South Africa	INDONESIA,AUSTRALIA	0	2	0	0	0	0	0	2
110	Psittaciformes	Psittacidae	Trichoglossus	Asia	Hong Kong	INDONESIA,AUSTRALIA	0	0	1	0	0	0	0	1
111	Psittaciformes	Psittacidae	Trichoglossus	Asia	Thailand	INDONESIA,AUSTRALIA	5	4	0	0	0	0	0	9
112	Psittaciformes	Psittacidae	Trichoglossus	Australia (Oceania)	Australia	INDONESIA,AUSTRALIA	0	0	0	0	0	0	37	37
113	Psittaciformes	Psittacidae	Trichoglossus	Europe	Italy	INDONESIA,AUSTRALIA	0	0	1	0	0	0	0	1
114	Psittaciformes	Psittacidae	Trichoglossus	Europe	Norway	INDONESIA,AUSTRALIA	0	0	1	0	0	0	0	1
115	Psittaciformes	Psittacidae	Trichoglossus	Europe	Portugal	INDONESIA,AUSTRALIA	0	0	6	0	0	0	0	6
116	Psittaciformes	Psittacidae	Trichoglossus	Europe	United Kingdom	INDONESIA,AUSTRALIA	0	0	2	0	0	0	0	2
117	Psittaciformes	Psittacidae	Trichoglossus	North America	United States	INDONESIA,AUSTRALIA	1	0	0	0	0	0	0	1
118	Psittaciformes	Psittacidae	Trichoglossus	North America	United States	INDONESIA,AUSTRALIA	5	6	1	3	0	0	0	12
119	Psittaciformes	Psittacidae	Trichoglossus	North America	United States	INDONESIA,AUSTRALIA	2	4	0	0	0	0	0	6
120	Psittaciformes	Psittacidae	Trichoglossus	North America	United States	INDONESIA,AUSTRALIA	2	1	0	1	0	0	0	3
121	Psittaciformes	Psittacidae	Trichoglossus	North America	United States	INDONESIA,AUSTRALIA	1	2	0	2	0	0	0	3
122	Psittaciformes	Psittacidae	Trichoglossus	North America	United States	INDONESIA,AUSTRALIA	0	2	0	0	0	0	0	2
123	Psittaciformes	Psittacidae	Trichoglossus	North America	United States	INDONESIA,AUSTRALIA	0	0	2	0	0	0	0	2
124	Psittaciformes	Psittacidae	Trichoglossus	North America	United States	INDONESIA,AUSTRALIA	2	0	0	0	0	0	0	2
125	Psittaciformes	Psittacidae	Trichoglossus	North America	United States	INDONESIA,AUSTRALIA	2	1	0	0	0	0	0	3
276	Psittaciformes	Psittacidae	Trichoglossus haematodus color_mutation	North America	United States	-	0	1	0	0	0	0	0	1
277	Psittaciformes	Psittacidae	Trichoglossus rosenbergii	Europe	Spain	BIAK ISLAND INDONESIA	0	0	1	0	0	0	0	1
278	Psittaciformes	Psittacidae	Trichoglossus rosenbergii	North America	United States	BIAK ISLAND INDONESIA	5	3	0	0	0	0	0	8
429	Psittaciformes	Psittacidae	Trichoglossus moluccanus color_mutation	Europe	Netherlands	-	1	1	0	0	0	0	0	2
471	Psittaciformes	Psittacidae	Trichoglossus capistratus	Asia	Singapore	-	10	11	2	4	0	0	0	23
472	Psittaciformes	Psittacidae	Trichoglossus capistratus	North America	United States	-	0	1	6	2	0	0	0	7
473	Psittaciformes	Psittacidae	Trichoglossus capistratus	North America	United States	-	1	0	0	0	0	0	0	1
474	Psittaciformes	Psittacidae	Trichoglossus capistratus	North America	United States	-	0	0	4	0	0	0	0	4
475	Psittaciformes	Psittacidae	Trichoglossus capistratus	North America	United States	-	1	2	0	0	0	0	0	3
476	Psittaciformes	Psittacidae	Trichoglossus capistratus capistratus	Europe	Germany	TIMOR INDONESIA	1	1	0	0	0	0	0	2
477	Psittaciformes	Psittacidae	Trichoglossus capistratus capistratus	North America	United States	TIMOR INDONESIA	1	0	0	0	0	0	0	1
478	Psittaciformes	Psittacidae	Trichoglossus capistratus capistratus	North America	United States	TIMOR INDONESIA	0	2	0	0	0	0	0	2
479	Psittaciformes	Psittacidae	Trichoglossus capistratus capistratus	North America	United States	TIMOR INDONESIA	2	0	0	0	0	0	0	2
480	Psittaciformes	Psittacidae	Trichoglossus capistratus fortis	Asia	Israel	SUMBAWA ISLANDS INDONESIA	0	0	0	0	0	0	3	3
481	Psittaciformes	Psittacidae	Trichoglossus capistratus fortis	Asia	Japan	SUMBAWA ISLANDS INDONESIA	1	0	0	0	0	0	0	1
541	Psittaciformes	Psittacidae	Trichoglossus chlorolepidotus color_mutation	Australia (Oceania)	Australia	-	0	0	1	0	0	0	0	1
571	Psittaciformes	Psittacidae	Lorius	South America	Brazil	NEW GUINEA REGION	0	0	1	0	0	0	0	1
829	Psittaciformes	Psittacidae	Strigops habroptilus	Australia (Oceania)	New Zealand	NEW ZEALAND	0	2	57	38	0	0	0	59
859	Psittaciformes	Psittacidae	Cyanoramphus	Europe	United Kingdom	NEW ZEALAND,ISLANDS	1	1	0	0	0	0	0	2
860	Psittaciformes	Psittacidae	Cyanoramphus	North America	United States	NEW ZEALAND,ISLANDS	0	0	2	0	0	0	0	2
861	Psittaciformes	Psittacidae	Cyanoramphus	North America	United States	NEW ZEALAND,ISLANDS	0	0	0	0	0	0	6	6
873	Psittaciformes	Psittacidae	Cyanoramphus auriceps color_mutation	Europe	United Kingdom	-	1	1	0	0	0	0	0	2
912	Psittaciformes	Psittacidae	Cyanoramphus novaezelandiae color_mutation	Europe	Netherlands	-	0	0	1	0	0	0	0	1
913	Psittaciformes	Psittacidae	Cyanoramphus novaezelandiae color_mutation	Europe	Ukraine	-	0	0	0	0	1	1	0	2
917	Psittaciformes	Psittacidae	Purpureicephalus	Australia (Oceania)	Australia	-	0	0	2	0	0	0	0	2
922	Psittaciformes	Psittacidae	Barnardius barnardi	Europe	Poland	NORTHWEST QUEENSLAND	0	0	0	0	0	1	0	1
941	Psittaciformes	Psittacidae	Platycercus	Asia	Turkey	Australia,Tasmania	0	0	0	0	0	0	6	6
942	Psittaciformes	Psittacidae	Platycercus	Europe	Russian Federation	Australia,Tasmania	0	0	0	0	0	0	1	1
943	Psittaciformes	Psittacidae	Platycercus	Europe	United Kingdom	Australia,Tasmania	1	1	0	0	0	0	0	2
944	Psittaciformes	Psittacidae	Platycercus	Europe	United Kingdom	Australia,Tasmania	0	0	1	0	0	0	0	1
945	Psittaciformes	Psittacidae	Platycercus	North America	United States	Australia,Tasmania	1	0	0	0	0	0	0	1
946	Psittaciformes	Psittacidae	Platycercus	South America	Chile	Australia,Tasmania	0	0	5	0	0	0	0	5
947	Psittaciformes	Psittacidae	Platycercus adelaidae	Asia	Thailand	SOUTHERN AUSTRALIA	0	1	0	0	0	0	0	1
948	Psittaciformes	Psittacidae	Platycercus adelaidae	Europe	Netherlands	SOUTHERN AUSTRALIA	0	0	2	0	0	0	0	2
949	Psittaciformes	Psittacidae	Platycercus adelaidae adelaidae	Asia	Thailand	Southern Australia	1	0	0	0	0	0	0	1
1017	Psittaciformes	Psittacidae	Platycercus elegans color_mutation	Europe	United Kingdom	-	0	0	1	0	0	0	0	1
1103	Psittaciformes	Psittacidae	Platycercus eximius color_mutation	Europe	United Kingdom	-	0	0	1	0	0	0	0	1
1169	Psittaciformes	Psittacidae	Neophema bourkii color_mutation	Europe	Serbia	-	0	0	3	0	0	0	0	3
1213	Psittaciformes	Psittacidae	Neophema pulchella color_mutation	Europe	United Kingdom	-	0	0	1	0	0	0	0	1
1258	Psittaciformes	Psittacidae	Melopsittacus	Africa	South Africa	-	0	0	4	3	0	0	0	4
1259	Psittaciformes	Psittacidae	Melopsittacus	Asia	Sri Lanka	-	0	0	1	0	0	0	0	1
1260	Psittaciformes	Psittacidae	Melopsittacus	Australia (Oceania)	Australia	-	4	5	7	7	0	0	0	16
1261	Psittaciformes	Psittacidae	Melopsittacus	Europe	Netherlands	-	0	0	6	0	0	0	0	6
1262	Psittaciformes	Psittacidae	Melopsittacus	Europe	United Kingdom	-	0	0	2	0	0	0	0	2
1263	Psittaciformes	Psittacidae	Melopsittacus	Europe	United Kingdom	-	6	11	0	0	0	0	0	17
1264	Psittaciformes	Psittacidae	Melopsittacus	Europe	United Kingdom	-	0	0	3	0	0	0	15	18
1265	Psittaciformes	Psittacidae	Melopsittacus	Europe	United Kingdom	-	0	0	0	0	0	0	10	10
1266	Psittaciformes	Psittacidae	Melopsittacus	North America	United States	-	6	10	54	0	0	0	2	72
1267	Psittaciformes	Psittacidae	Melopsittacus	North America	United States	-	2	0	0	0	0	0	0	2
1268	Psittaciformes	Psittacidae	Melopsittacus	North America	United States	-	0	0	0	0	0	0	50	50
1269	Psittaciformes	Psittacidae	Melopsittacus	North America	United States	-	0	0	1	0	0	0	43	44
1270	Psittaciformes	Psittacidae	Melopsittacus	North America	United States	-	2	2	7	0	0	1	155	167
1271	Psittaciformes	Psittacidae	Melopsittacus	North America	United States	-	0	0	0	0	24	0	0	24
1272	Psittaciformes	Psittacidae	Melopsittacus	North America	United States	-	0	0	0	0	0	0	65	65
1273	Psittaciformes	Psittacidae	Melopsittacus	North America	United States	-	0	0	0	0	0	0	237	237
1486	Psittaciformes	Psittacidae	Melopsittacus undulatus color_mutation	Asia	United Arab Emirates	-	0	0	1	0	1	2	0	4
1487	Psittaciformes	Psittacidae	Melopsittacus undulatus color_mutation	Australia (Oceania)	Australia	-	0	0	0	0	0	0	18	18
1488	Psittaciformes	Psittacidae	Melopsittacus undulatus color_mutation	Europe	Germany	-	0	0	0	0	0	0	42	42
1489	Psittaciformes	Psittacidae	Melopsittacus undulatus color_mutation	Europe	Germany	-	0	0	0	0	3	3	36	42
1490	Psittaciformes	Psittacidae	Melopsittacus undulatus color_mutation	Europe	Netherlands	-	33	18	0	0	0	0	0	51
1491	Psittaciformes	Psittacidae	Melopsittacus undulatus color_mutation	Europe	Netherlands	-	10	9	0	0	0	0	0	19
1492	Psittaciformes	Psittacidae	Melopsittacus undulatus color_mutation	Europe	Netherlands	-	0	0	0	0	0	0	19	19
1493	Psittaciformes	Psittacidae	Melopsittacus undulatus color_mutation	Europe	United Kingdom	-	4	3	0	0	0	0	0	7
1496	Psittaciformes	Psittacidae	Northiella	Australia (Oceania)	Australia	-	1	0	0	0	0	0	0	1
1515	Psittaciformes	Psittacidae	Eclectus	Asia	Israel	-	9	6	0	0	0	0	0	15
1516	Psittaciformes	Psittacidae	Eclectus	Australia (Oceania)	Australia	-	2	0	0	0	0	0	0	2
1517	Psittaciformes	Psittacidae	Eclectus	Australia (Oceania)	Australia	-	2	0	0	0	0	0	0	2
1518	Psittaciformes	Psittacidae	Eclectus	Australia (Oceania)	Australia	-	1	1	0	0	11	8	0	21
1519	Psittaciformes	Psittacidae	Eclectus	Australia (Oceania)	Australia	-	1	0	0	0	0	0	0	1
1520	Psittaciformes	Psittacidae	Eclectus	Australia (Oceania)	Australia	-	0	1	0	0	2	1	0	4
1521	Psittaciformes	Psittacidae	Eclectus	Australia (Oceania)	Australia	-	1	1	0	0	0	0	0	2
1522	Psittaciformes	Psittacidae	Eclectus	Europe	Hungary	-	3	8	0	0	0	0	0	11
1523	Psittaciformes	Psittacidae	Eclectus	Europe	Netherlands	-	0	0	0	0	0	0	10	10
1524	Psittaciformes	Psittacidae	Eclectus	Europe	United Kingdom	-	0	1	0	0	0	0	0	1
1525	Psittaciformes	Psittacidae	Eclectus	North America	United States	-	1	0	0	0	0	0	0	1
1526	Psittaciformes	Psittacidae	Eclectus	North America	United States	-	1	0	0	0	0	0	0	1
1527	Psittaciformes	Psittacidae	Eclectus	North America	United States	-	0	1	0	0	0	0	0	1
1793	Psittaciformes	Psittacidae	Aprosmictus	Australia (Oceania)	Australia	Australia,New Guinea	0	0	1	0	0	0	0	1
1794	Psittaciformes	Psittacidae	Aprosmictus	Australia (Oceania)	Australia	Australia,New Guinea	0	0	0	0	1	1	0	2
1815	Psittaciformes	Psittacidae	Polytelis	Australia (Oceania)	Australia	Australia	0	0	0	0	3	2	3	8
1900	Psittaciformes	Psittacidae	Polytelis swainsonii color_mutation	Asia	Turkey	-	1	0	0	0	0	0	0	1
1901	Psittaciformes	Psittacidae	Psittacula	Australia (Oceania)	New Zealand	INDONESIA,INDIA	0	0	0	0	0	1	0	1
1902	Psittaciformes	Psittacidae	Psittacula	Europe	Gibraltar	INDONESIA,INDIA	0	2	0	0	0	0	0	2
1903	Psittaciformes	Psittacidae	Psittacula	North America	United States	INDONESIA,INDIA	0	0	2	0	0	0	0	2
2228	Psittaciformes	Psittacidae	Psittacula krameri color_mutation	Asia	India	-	0	0	0	0	4	1	1	6
2269	Psittaciformes	Psittacidae	Agapornis	Asia	India	MADAGASCAR	0	0	0	0	0	0	2	2
2270	Psittaciformes	Psittacidae	Agapornis	Asia	Sri Lanka	MADAGASCAR	0	0	18	0	0	0	30	48
2271	Psittaciformes	Psittacidae	Agapornis	Europe	Austria	MADAGASCAR	0	0	8	8	0	0	1	9
2272	Psittaciformes	Psittacidae	Agapornis	Europe	Belgium	MADAGASCAR	0	0	11	0	0	0	0	11
2273	Psittaciformes	Psittacidae	Agapornis	Europe	France	MADAGASCAR	0	0	26	49	0	0	149	175
2274	Psittaciformes	Psittacidae	Agapornis	Europe	Germany	MADAGASCAR	0	0	0	0	1	1	2	4
2275	Psittaciformes	Psittacidae	Agapornis	Europe	Hungary	MADAGASCAR	0	0	0	0	0	0	3	3
2276	Psittaciformes	Psittacidae	Agapornis	Europe	Netherlands	MADAGASCAR	0	1	0	0	0	0	0	1
2277	Psittaciformes	Psittacidae	Agapornis	Europe	Netherlands	MADAGASCAR	0	0	0	0	4	4	42	50
2278	Psittaciformes	Psittacidae	Agapornis	Europe	Romania	MADAGASCAR	0	0	0	0	0	0	2	2
2279	Psittaciformes	Psittacidae	Agapornis	Europe	Russian Federation	MADAGASCAR	0	0	0	0	0	0	2	2
2280	Psittaciformes	Psittacidae	Agapornis	North America	Mexico	MADAGASCAR	0	0	1	1	0	0	1	2
2281	Psittaciformes	Psittacidae	Agapornis	North America	Mexico	MADAGASCAR	0	0	0	0	0	0	8	8
2282	Psittaciformes	Psittacidae	Agapornis	North America	United States	MADAGASCAR	1	0	0	0	0	0	0	1
2283	Psittaciformes	Psittacidae	Agapornis	North America	United States	MADAGASCAR	0	0	7	0	0	0	308	315
2284	Psittaciformes	Psittacidae	Agapornis	South America	Colombia	MADAGASCAR	0	0	0	0	0	0	1	1
2360	Psittaciformes	Psittacidae	Agapornis fischeri color_mutation	Africa	Mauritius	-	0	0	0	0	0	0	39	39
2361	Psittaciformes	Psittacidae	Agapornis fischeri color_mutation	Europe	Netherlands	-	1	2	0	0	0	0	0	3
2362	Psittaciformes	Psittacidae	Agapornis fischeri color_mutation	Europe	Netherlands	-	0	1	0	0	0	0	0	1
2462	Psittaciformes	Psittacidae	Agapornis personatus color_mutation	Europe	Denmark	-	0	0	0	0	0	0	9	9
2463	Psittaciformes	Psittacidae	Agapornis personatus color_mutation	Europe	Netherlands	-	2	1	0	0	0	0	0	3
2548	Psittaciformes	Psittacidae	Agapornis roseicollis color_mutation	Europe	Germany	-	0	0	0	0	0	0	34	34
2549	Psittaciformes	Psittacidae	Agapornis roseicollis color_mutation	Europe	Germany	-	0	0	0	0	0	0	6	6
2550	Psittaciformes	Psittacidae	Agapornis roseicollis color_mutation	Europe	Netherlands	-	1	3	0	0	0	0	0	4
2558	Psittaciformes	Psittacidae	Coracopsis	Europe	Sweden	MADAGASCAR	1	0	0	0	0	0	0	1
2618	Psittaciformes	Psittacidae	Psittacus	Africa	Uganda	-	0	0	14	0	1	0	1	16
2619	Psittaciformes	Psittacidae	Psittacus	Asia	India	-	0	0	0	0	2	1	0	3
2620	Psittaciformes	Psittacidae	Psittacus	Asia	Israel	-	3	1	0	0	0	0	0	4
2621	Psittaciformes	Psittacidae	Psittacus	Asia	Japan	-	1	1	0	0	0	0	0	2
2622	Psittaciformes	Psittacidae	Psittacus	Europe	Gibraltar	-	2	3	0	0	0	0	0	5
2623	Psittaciformes	Psittacidae	Psittacus	Europe	Hungary	-	1	0	0	0	0	0	0	1
2624	Psittaciformes	Psittacidae	Psittacus	Europe	United Kingdom	-	1	0	0	0	0	0	0	1
2625	Psittaciformes	Psittacidae	Psittacus	Europe	United Kingdom	-	1	1	2	0	0	0	0	4
2626	Psittaciformes	Psittacidae	Psittacus	Europe	United Kingdom	-	0	1	1	0	0	0	0	2
2627	Psittaciformes	Psittacidae	Psittacus	North America	United States	-	0	0	1	0	0	0	0	1
3147	Psittaciformes	Psittacidae	Anodorhynchus	North America	United States	BRAZIL-BOLIVIA-ARGENTINA	1	0	0	0	0	0	0	1
3299	Psittaciformes	Psittacidae	Cyanopsitta	Europe	Belgium	-	0	1	0	0	0	0	0	1
3301	Psittaciformes	Psittacidae	Ara	Africa	Mauritius	MEXICO-SOUTH AMERICA	2	2	1	0	0	0	0	5
3302	Psittaciformes	Psittacidae	Ara	Africa	South Africa	MEXICO-SOUTH AMERICA	0	1	0	0	0	0	0	1
3303	Psittaciformes	Psittacidae	Ara	Africa	South Africa	MEXICO-SOUTH AMERICA	3	0	0	0	0	0	0	3
3304	Psittaciformes	Psittacidae	Ara	Asia	Cyprus	MEXICO-SOUTH AMERICA	1	1	0	0	0	0	0	2
3305	Psittaciformes	Psittacidae	Ara	Asia	India	MEXICO-SOUTH AMERICA	0	0	0	0	2	2	0	4
3306	Psittaciformes	Psittacidae	Ara	Asia	Israel	MEXICO-SOUTH AMERICA	0	0	2	0	0	0	0	2
3307	Psittaciformes	Psittacidae	Ara	Asia	Singapore	MEXICO-SOUTH AMERICA	0	0	1	0	0	0	0	1
3308	Psittaciformes	Psittacidae	Ara	Australia (Oceania)	Australia	MEXICO-SOUTH AMERICA	0	2	0	0	0	0	0	2
3309	Psittaciformes	Psittacidae	Ara	Australia (Oceania)	New Caledonia	MEXICO-SOUTH AMERICA	2	2	0	0	0	0	0	4
3310	Psittaciformes	Psittacidae	Ara	Europe	Austria	MEXICO-SOUTH AMERICA	0	0	0	0	0	0	7	7
3311	Psittaciformes	Psittacidae	Ara	Europe	Belgium	MEXICO-SOUTH AMERICA	0	3	0	0	0	0	0	3
3312	Psittaciformes	Psittacidae	Ara	Europe	France	MEXICO-SOUTH AMERICA	0	0	1	0	0	0	0	1
3313	Psittaciformes	Psittacidae	Ara	Europe	France	MEXICO-SOUTH AMERICA	0	1	0	0	0	0	0	1
3314	Psittaciformes	Psittacidae	Ara	Europe	France	MEXICO-SOUTH AMERICA	1	1	2	0	0	0	0	4
3315	Psittaciformes	Psittacidae	Ara	Europe	France	MEXICO-SOUTH AMERICA	0	0	1	0	0	0	0	1
3316	Psittaciformes	Psittacidae	Ara	Europe	France	MEXICO-SOUTH AMERICA	0	2	0	0	0	0	0	2
3317	Psittaciformes	Psittacidae	Ara	Europe	France	MEXICO-SOUTH AMERICA	1	0	0	0	0	0	0	1
3318	Psittaciformes	Psittacidae	Ara	Europe	France	MEXICO-SOUTH AMERICA	0	2	3	0	0	0	0	5
3319	Psittaciformes	Psittacidae	Ara	Europe	Hungary	MEXICO-SOUTH AMERICA	0	0	1	1	0	0	0	1
3320	Psittaciformes	Psittacidae	Ara	Europe	Hungary	MEXICO-SOUTH AMERICA	3	1	0	2	0	0	0	4
3321	Psittaciformes	Psittacidae	Ara	Europe	Netherlands	MEXICO-SOUTH AMERICA	1	1	0	0	0	0	0	2
3322	Psittaciformes	Psittacidae	Ara	Europe	Netherlands	MEXICO-SOUTH AMERICA	2	1	0	0	0	0	0	3
3323	Psittaciformes	Psittacidae	Ara	Europe	Netherlands	MEXICO-SOUTH AMERICA	1	1	0	0	0	0	0	2
3324	Psittaciformes	Psittacidae	Ara	Europe	Netherlands	MEXICO-SOUTH AMERICA	1	1	1	0	0	0	0	3
3325	Psittaciformes	Psittacidae	Ara	Europe	Norway	MEXICO-SOUTH AMERICA	0	0	1	0	0	0	0	1
3326	Psittaciformes	Psittacidae	Ara	Europe	Portugal	MEXICO-SOUTH AMERICA	0	0	1	0	0	0	0	1
3327	Psittaciformes	Psittacidae	Ara	Europe	Portugal	MEXICO-SOUTH AMERICA	1	0	0	0	0	0	0	1
3328	Psittaciformes	Psittacidae	Ara	Europe	Russian Federation	MEXICO-SOUTH AMERICA	0	1	0	0	0	0	0	1
3329	Psittaciformes	Psittacidae	Ara	Europe	Russian Federation	MEXICO-SOUTH AMERICA	0	0	2	0	0	0	0	2
3330	Psittaciformes	Psittacidae	Ara	Europe	Spain	MEXICO-SOUTH AMERICA	0	1	0	0	0	0	0	1
3331	Psittaciformes	Psittacidae	Ara	Europe	Spain	MEXICO-SOUTH AMERICA	1	0	1	0	0	0	0	2
3332	Psittaciformes	Psittacidae	Ara	Europe	Sweden	MEXICO-SOUTH AMERICA	0	2	0	0	0	0	0	2
3333	Psittaciformes	Psittacidae	Ara	Europe	United Kingdom	MEXICO-SOUTH AMERICA	0	1	0	0	0	0	0	1
3334	Psittaciformes	Psittacidae	Ara	Europe	United Kingdom	MEXICO-SOUTH AMERICA	0	0	2	0	0	0	0	2
3335	Psittaciformes	Psittacidae	Ara	Europe	United Kingdom	MEXICO-SOUTH AMERICA	1	1	0	0	0	0	0	2
3336	Psittaciformes	Psittacidae	Ara	Europe	United Kingdom	MEXICO-SOUTH AMERICA	1	0	0	0	0	0	0	1
3337	Psittaciformes	Psittacidae	Ara	Europe	United Kingdom	MEXICO-SOUTH AMERICA	1	0	0	0	0	0	0	1
3338	Psittaciformes	Psittacidae	Ara	Europe	United Kingdom	MEXICO-SOUTH AMERICA	0	0	3	0	0	0	0	3
3339	Psittaciformes	Psittacidae	Ara	Europe	United Kingdom	MEXICO-SOUTH AMERICA	0	0	5	0	0	0	0	5
3340	Psittaciformes	Psittacidae	Ara	Europe	United Kingdom	MEXICO-SOUTH AMERICA	2	0	0	0	0	0	0	2
3341	Psittaciformes	Psittacidae	Ara	Europe	United Kingdom	MEXICO-SOUTH AMERICA	1	0	0	0	0	0	0	1
3342	Psittaciformes	Psittacidae	Ara	North America	Bahamas	MEXICO-SOUTH AMERICA	0	1	0	0	0	0	0	1
3343	Psittaciformes	Psittacidae	Ara	North America	Canada	MEXICO-SOUTH AMERICA	0	1	0	0	0	0	0	1
3344	Psittaciformes	Psittacidae	Ara	North America	Guatemala	MEXICO-SOUTH AMERICA	1	1	1	0	0	0	0	3
3345	Psittaciformes	Psittacidae	Ara	North America	Mexico	MEXICO-SOUTH AMERICA	0	0	1	0	0	0	0	1
3346	Psittaciformes	Psittacidae	Ara	North America	Mexico	MEXICO-SOUTH AMERICA	1	0	0	0	0	0	0	1
3347	Psittaciformes	Psittacidae	Ara	North America	Mexico	MEXICO-SOUTH AMERICA	1	1	1	0	0	0	0	3
3348	Psittaciformes	Psittacidae	Ara	North America	Mexico	MEXICO-SOUTH AMERICA	0	0	3	0	0	0	0	3
3349	Psittaciformes	Psittacidae	Ara	North America	United States	MEXICO-SOUTH AMERICA	1	0	0	0	0	0	0	1
3350	Psittaciformes	Psittacidae	Ara	North America	United States	MEXICO-SOUTH AMERICA	0	1	0	0	0	0	0	1
3351	Psittaciformes	Psittacidae	Ara	North America	United States	MEXICO-SOUTH AMERICA	0	0	4	0	0	0	0	4
3352	Psittaciformes	Psittacidae	Ara	North America	United States	MEXICO-SOUTH AMERICA	0	3	0	0	0	0	0	3
3353	Psittaciformes	Psittacidae	Ara	North America	United States	MEXICO-SOUTH AMERICA	0	0	1	0	0	0	0	1
3354	Psittaciformes	Psittacidae	Ara	North America	United States	MEXICO-SOUTH AMERICA	1	1	0	0	0	0	0	2
3355	Psittaciformes	Psittacidae	Ara	North America	United States	MEXICO-SOUTH AMERICA	2	0	2	0	0	0	0	4
3356	Psittaciformes	Psittacidae	Ara	North America	United States	MEXICO-SOUTH AMERICA	0	1	0	0	0	0	0	1
3357	Psittaciformes	Psittacidae	Ara	North America	United States	MEXICO-SOUTH AMERICA	1	0	0	0	0	0	0	1
3358	Psittaciformes	Psittacidae	Ara	North America	United States	MEXICO-SOUTH AMERICA	0	0	1	0	0	0	0	1
3359	Psittaciformes	Psittacidae	Ara	North America	United States	MEXICO-SOUTH AMERICA	0	1	0	0	0	0	0	1
3360	Psittaciformes	Psittacidae	Ara	South America	Brazil	MEXICO-SOUTH AMERICA	4	3	0	0	0	0	0	7
3361	Psittaciformes	Psittacidae	Ara	South America	Brazil	MEXICO-SOUTH AMERICA	1	1	1	0	0	0	0	3
3362	Psittaciformes	Psittacidae	Ara	South America	Colombia	MEXICO-SOUTH AMERICA	2	0	1	0	0	0	0	3
3363	Psittaciformes	Psittacidae	Ara	South America	Colombia	MEXICO-SOUTH AMERICA	0	0	1	0	0	0	0	1
3872	Psittaciformes	Psittacidae	Ara ararauna color_mutation	Asia	United Arab Emirates	-	0	0	1	0	0	0	0	1
3873	Psittaciformes	Psittacidae	Ara ararauna color_mutation	Europe	Ukraine	-	1	2	4	3	0	0	0	7
3874	Psittaciformes	Psittacidae	Ara ararauna color_mutation	North America	Bahamas	-	1	0	0	0	0	0	0	1
3875	Psittaciformes	Psittacidae	Ara ararauna color_mutation	South America	Colombia	-	0	0	2	0	0	0	0	2
3876	Psittaciformes	Psittacidae	Ara ararauna color_mutation	South America	Colombia	-	0	0	1	0	0	0	0	1
4199	Psittaciformes	Psittacidae	Ara chloropterus color_mutation	Africa	South Africa	-	1	0	0	0	0	0	0	1
4542	Psittaciformes	Psittacidae	Ara macao color_mutation	Asia	United Arab Emirates	-	0	0	1	0	0	0	0	1
4893	Psittaciformes	Psittacidae	Aratinga	Africa	Mauritius	Americas	0	0	2	0	0	0	19	21
4894	Psittaciformes	Psittacidae	Aratinga	Africa	South Africa	Americas	0	0	3	3	0	0	0	3
4895	Psittaciformes	Psittacidae	Aratinga	Asia	United Arab Emirates	Americas	0	0	2	0	0	0	0	2
4896	Psittaciformes	Psittacidae	Aratinga	Europe	United Kingdom	Americas	0	0	1	0	0	0	0	1
4897	Psittaciformes	Psittacidae	Aratinga	Europe	United Kingdom	Americas	3	3	0	0	0	0	0	6
4898	Psittaciformes	Psittacidae	Aratinga	Europe	United Kingdom	Americas	1	3	0	0	0	0	0	4
4899	Psittaciformes	Psittacidae	Aratinga	North America	United States	Americas	4	2	0	0	0	0	0	6
4900	Psittaciformes	Psittacidae	Aratinga	North America	United States	Americas	1	0	0	0	0	0	0	1
4915	Psittaciformes	Psittacidae	Aratinga guarouba	Europe	Austria	NORTHEAST BRAZIL	1	1	0	0	0	0	0	2
4952	Psittaciformes	Psittacidae	Aratinga jandaya color_mutation	Africa	South Africa	-	0	0	2	2	0	0	0	2
5111	Psittaciformes	Psittacidae	Aratinga solstitialis color_mutation	Africa	South Africa	-	1	0	0	0	0	0	0	1
5151	Psittaciformes	Psittacidae	Nandayus	Africa	South Africa	-	0	0	1	0	0	0	0	1
5152	Psittaciformes	Psittacidae	Nandayus	Europe	Switzerland	-	1	0	0	0	0	0	0	1
5153	Psittaciformes	Psittacidae	Nandayus	Europe	United Kingdom	-	0	0	2	0	0	0	0	2
5255	Psittaciformes	Psittacidae	Pyrrhura	Europe	Netherlands	CENTRAL,SOUTH AMERICA	1	0	0	0	0	0	0	1
5296	Psittaciformes	Psittacidae	Pyrrhura hypoxantha	Europe	France	SOUTHEST MATO GROSSO	0	1	0	0	0	0	0	1
5297	Psittaciformes	Psittacidae	Pyrrhura hypoxantha	Europe	Germany	SOUTHEST MATO GROSSO	3	5	0	1	0	0	0	8
5298	Psittaciformes	Psittacidae	Pyrrhura hypoxantha	Europe	Hungary	SOUTHEST MATO GROSSO	0	0	0	0	0	0	11	11
5299	Psittaciformes	Psittacidae	Pyrrhura hypoxantha	Europe	Netherlands	SOUTHEST MATO GROSSO	0	0	2	0	0	0	0	2
5351	Psittaciformes	Psittacidae	Pyrrhura molinae color_mutation	Africa	South Africa	-	0	1	0	0	0	0	0	1
5352	Psittaciformes	Psittacidae	Pyrrhura molinae color_mutation	Asia	Israel	-	0	0	4	0	0	0	0	4
5353	Psittaciformes	Psittacidae	Pyrrhura molinae color_mutation	Europe	Netherlands	-	0	2	7	0	0	0	0	9
5354	Psittaciformes	Psittacidae	Pyrrhura molinae color_mutation	Europe	United Kingdom	-	0	1	2	0	0	0	0	3
5388	Psittaciformes	Psittacidae	Pyrrhura rhodogaster	Australia (Oceania)	Australia	NORTHERN BRAZIL	3	2	1	0	0	0	0	6
5389	Psittaciformes	Psittacidae	Pyrrhura rhodogaster	Europe	Denmark	NORTHERN BRAZIL	1	1	0	0	0	0	0	2
5395	Psittaciformes	Psittacidae	Pyrrhura emma	Europe	Germany	-	7	6	4	0	0	0	0	17
5396	Psittaciformes	Psittacidae	Pyrrhura emma	Europe	Netherlands	-	1	1	0	0	0	0	0	2
5397	Psittaciformes	Psittacidae	Pyrrhura emma	Europe	United Kingdom	-	3	1	0	0	0	0	0	4
5398	Psittaciformes	Psittacidae	Pyrrhura emma	South America	Colombia	-	0	0	9	0	0	0	0	9
5425	Psittaciformes	Psittacidae	Myiopsitta	Asia	Singapore	-	0	0	2	0	0	0	0	2
5426	Psittaciformes	Psittacidae	Myiopsitta	Europe	Denmark	-	0	0	0	0	0	0	24	24
5427	Psittaciformes	Psittacidae	Myiopsitta	Europe	Italy	-	0	1	0	0	0	0	0	1
5428	Psittaciformes	Psittacidae	Myiopsitta	Europe	United Kingdom	-	0	0	1	0	0	0	0	1
5501	Psittaciformes	Psittacidae	Forpus	Europe	Netherlands	SOUTH AMERICA,MEXICO	0	0	1	0	0	0	0	1
5502	Psittaciformes	Psittacidae	Forpus	Europe	United Kingdom	SOUTH AMERICA,MEXICO	0	0	2	0	0	0	0	2
5515	Psittaciformes	Psittacidae	Brotogeris	North America	United States	SOUTH AMERICA	0	0	16	0	0	0	0	16
5528	Psittaciformes	Psittacidae	Brotogeris versicolurus	North America	United States	NORTHERN SOUTH AMERICA	10	8	0	0	0	0	0	18
5529	Psittaciformes	Psittacidae	Brotogeris versicolurus chiriri	Europe	Netherlands	SOUTH AMERICA	1	0	0	0	0	0	0	1
5530	Psittaciformes	Psittacidae	Brotogeris versicolurus chiriri	South America	Argentina	SOUTH AMERICA	0	0	1	0	0	0	0	1
5531	Psittaciformes	Psittacidae	Brotogeris versicolurus chiriri	South America	Brazil	SOUTH AMERICA	3	0	0	0	0	0	0	3
5532	Psittaciformes	Psittacidae	Brotogeris versicolurus chiriri	South America	Brazil	SOUTH AMERICA	0	0	1	0	0	0	0	1
5533	Psittaciformes	Psittacidae	Brotogeris versicolurus chiriri	South America	Brazil	SOUTH AMERICA	1	0	2	0	0	0	0	3
5534	Psittaciformes	Psittacidae	Brotogeris versicolurus chiriri	South America	Brazil	SOUTH AMERICA	0	0	2	0	0	0	0	2
5536	Psittaciformes	Psittacidae	Pionites	North America	United States	SOUTH AMERICA	0	1	0	0	0	0	0	1
5608	Psittaciformes	Psittacidae	Pionus	Asia	Sri Lanka	SOUTH AMERICA	0	0	0	0	2	2	0	4
5682	Psittaciformes	Psittacidae	Pionus seniloides	North America	Mexico	MTNS VENEZUEL,COLOM-ECUAD	1	0	0	0	0	0	0	1
5683	Psittaciformes	Psittacidae	Pionus seniloides	North America	Mexico	MTNS VENEZUEL,COLOM-ECUAD	0	0	1	0	0	0	0	1
5684	Psittaciformes	Psittacidae	Pionus seniloides	South America	Ecuador	MTNS VENEZUEL,COLOM-ECUAD	0	0	1	0	0	0	0	1
5687	Psittaciformes	Psittacidae	Amazona	Asia	Turkey	CENTRAL,SOUTH AMERICA	0	0	3	0	0	0	0	3
5688	Psittaciformes	Psittacidae	Amazona	Asia	United Arab Emirates	CENTRAL,SOUTH AMERICA	0	3	0	0	0	0	0	3
5689	Psittaciformes	Psittacidae	Amazona	Europe	Netherlands	CENTRAL,SOUTH AMERICA	0	0	1	0	0	0	0	1
5690	Psittaciformes	Psittacidae	Amazona	Europe	Netherlands	CENTRAL,SOUTH AMERICA	0	0	1	0	0	0	0	1
5691	Psittaciformes	Psittacidae	Amazona	Europe	Portugal	CENTRAL,SOUTH AMERICA	0	0	1	0	0	0	0	1
5692	Psittaciformes	Psittacidae	Amazona	Europe	Russian Federation	CENTRAL,SOUTH AMERICA	0	0	0	0	1	0	0	1
5693	Psittaciformes	Psittacidae	Amazona	Europe	United Kingdom	CENTRAL,SOUTH AMERICA	1	1	0	0	0	0	0	2
5694	Psittaciformes	Psittacidae	Amazona	Europe	United Kingdom	CENTRAL,SOUTH AMERICA	1	0	0	0	0	0	0	1
5695	Psittaciformes	Psittacidae	Amazona	Europe	United Kingdom	CENTRAL,SOUTH AMERICA	0	0	5	0	0	0	0	5
5696	Psittaciformes	Psittacidae	Amazona	North America	Bahamas	CENTRAL,SOUTH AMERICA	1	0	0	0	0	0	0	1
5697	Psittaciformes	Psittacidae	Amazona	North America	Mexico	CENTRAL,SOUTH AMERICA	0	0	0	0	2	3	1	6
5698	Psittaciformes	Psittacidae	Amazona	North America	United States	CENTRAL,SOUTH AMERICA	0	1	0	0	0	0	0	1
5699	Psittaciformes	Psittacidae	Amazona	North America	United States	CENTRAL,SOUTH AMERICA	0	0	1	0	0	0	0	1
5854	Psittaciformes	Psittacidae	Amazona aestiva color_mutation	Europe	United Kingdom	-	1	0	0	0	0	0	0	1
6507	Psittaciformes	Psittacidae	Amazona oratrix magna	Europe	Netherlands	-	4	3	0	0	0	0	0	7
6624	Psittaciformes	Psittacidae	Deroptyus	North America	United States	-	1	0	0	0	0	0	0	1
6670	Psittaciformes	Psittacidae	Psittacara	Asia	Israel	-	0	0	2	0	0	0	0	2
6671	Psittaciformes	Psittacidae	Psittacara	North America	Mexico	-	0	0	0	0	0	0	4	4
6739	Psittaciformes	Psittacidae	Psittacara wagleri	North America	Mexico	-	0	0	1	0	0	0	0	1
6740	Psittaciformes	Psittacidae	Psittacara wagleri	South America	Colombia	-	0	1	3	0	0	0	0	4
6741	Psittaciformes	Psittacidae	Psittacara wagleri	South America	Colombia	-	0	0	6	0	0	0	0	6
6742	Psittaciformes	Psittacidae	Psittacara wagleri	South America	Colombia	-	0	0	1	0	0	0	0	1
6743	Psittaciformes	Psittacidae	Psittacara wagleri	South America	Colombia	-	1	1	1	0	0	0	0	3
6744	Psittaciformes	Psittacidae	Psittacara wagleri	South America	Colombia	-	0	0	2	0	0	0	0	2
6745	Psittaciformes	Psittacidae	Psittacara wagleri	South America	Colombia	-	3	3	0	0	0	0	0	6
6746	Psittaciformes	Psittacidae	Psittacara wagleri	South America	Colombia	-	1	0	2	0	0	0	0	3
6747	Psittaciformes	Psittacidae	Psittacara wagleri	South America	Ecuador	-	0	0	1	0	0	0	0	1
6748	Psittaciformes	Psittacidae	Psittacara holochlorus	North America	Mexico	-	1	0	0	0	0	0	0	1
6749	Psittaciformes	Psittacidae	Psittacara holochlorus	North America	Mexico	-	0	0	1	0	0	0	0	1
6750	Psittaciformes	Psittacidae	Psittacara holochlorus	North America	Mexico	-	0	0	2	0	0	0	0	2
6751	Psittaciformes	Psittacidae	Psittacara holochlorus	North America	United States	-	0	0	1	0	0	0	0	1
6752	Psittaciformes	Psittacidae	Psittacara rubritorquis	Africa	South Africa	-	1	1	0	0	0	0	0	2
6753	Psittaciformes	Psittacidae	Psittacara rubritorquis	Africa	South Africa	-	0	0	5	0	0	0	0	5
6754	Psittaciformes	Psittacidae	Psittacara rubritorquis	Africa	South Africa	-	1	2	1	0	0	0	0	4
6755	Psittaciformes	Psittacidae	Psittacara rubritorquis	Asia	Israel	-	0	0	0	0	1	1	2	4
6756	Psittaciformes	Psittacidae	Psittacara rubritorquis	Asia	Israel	-	0	0	0	0	0	0	11	11
6757	Psittaciformes	Psittacidae	Psittacara rubritorquis	Europe	Czech Republic	-	0	0	1	0	0	0	0	1
6758	Psittaciformes	Psittacidae	Psittacara rubritorquis	Europe	Netherlands	-	1	0	0	0	0	0	0	1
6759	Psittaciformes	Psittacidae	Psittacara frontatus	Europe	Czech Republic	-	2	3	0	0	0	0	0	5
6760	Psittaciformes	Psittacidae	Psittacara frontatus	Europe	Italy	-	1	0	0	0	0	0	0	1
6773	Psittaciformes	Psittacidae	Eupsittula aurea aurea	Europe	France	-	0	0	1	0	0	0	0	1
6791	Psittaciformes	Psittacidae	Eupsittula nana	North America	Costa Rica	-	0	0	2	0	0	0	0	2
6792	Psittaciformes	Psittacidae	Eupsittula nana	North America	Mexico	-	0	0	0	0	0	0	6	6
6920	Psittaciformes	Psittacidae	Diopsittaca	Europe	United Kingdom	-	1	0	0	0	0	0	0	1
6968	Psittaciformes	Psittacidae	Psephotellus dissimilis	Africa	Morocco	-	0	0	0	0	0	0	14	14
6969	Psittaciformes	Psittacidae	Psephotellus dissimilis	Asia	Singapore	-	0	1	0	0	0	0	0	1
6970	Psittaciformes	Psittacidae	Psephotellus dissimilis	Australia (Oceania)	Australia	-	1	1	1	1	0	0	0	3
6971	Psittaciformes	Psittacidae	Psephotellus dissimilis	Australia (Oceania)	Australia	-	0	1	0	0	0	0	0	1
6972	Psittaciformes	Psittacidae	Psephotellus dissimilis	Australia (Oceania)	Australia	-	0	0	0	0	0	0	3	3
6973	Psittaciformes	Psittacidae	Psephotellus dissimilis	Australia (Oceania)	Australia	-	1	1	0	0	0	0	0	2
6974	Psittaciformes	Psittacidae	Psephotellus dissimilis	Europe	Czech Republic	-	1	1	0	0	0	0	0	2
6975	Psittaciformes	Psittacidae	Psephotellus dissimilis	Europe	Germany	-	0	1	0	0	0	0	0	1
6976	Psittaciformes	Psittacidae	Psephotellus dissimilis	Europe	Greece	-	4	2	0	1	0	0	0	6
6977	Psittaciformes	Psittacidae	Psephotellus dissimilis	Europe	United Kingdom	-	3	0	0	0	0	0	0	3
6978	Psittaciformes	Psittacidae	Psephotellus dissimilis	Europe	United Kingdom	-	0	5	0	0	0	0	0	5
7202	Psittaciformes	Cacatuidae	Callocephalon	Australia (Oceania)	Australia	-	0	1	0	0	0	0	0	1
7218	Psittaciformes	Cacatuidae	Eolophus	Asia	India	-	0	0	0	0	0	0	1	1
7219	Psittaciformes	Cacatuidae	Eolophus	Asia	United Arab Emirates	-	0	2	0	0	0	0	0	2
7220	Psittaciformes	Cacatuidae	Eolophus	Australia (Oceania)	Australia	-	0	0	1	0	0	0	0	1
7221	Psittaciformes	Cacatuidae	Eolophus	Australia (Oceania)	Australia	-	0	0	1	0	0	0	0	1
7222	Psittaciformes	Cacatuidae	Eolophus	Australia (Oceania)	Australia	-	1	0	0	0	0	0	0	1
7223	Psittaciformes	Cacatuidae	Eolophus	Australia (Oceania)	Australia	-	0	0	0	0	0	0	16	16
7224	Psittaciformes	Cacatuidae	Eolophus	Australia (Oceania)	Australia	-	0	1	0	0	0	0	0	1
7225	Psittaciformes	Cacatuidae	Eolophus	Australia (Oceania)	Australia	-	0	0	0	0	1	2	1	4
7392	Psittaciformes	Cacatuidae	Cacatua	Asia	India	Australia,southeast Asia,islands	0	0	0	0	2	2	0	4
7393	Psittaciformes	Cacatuidae	Cacatua	Asia	Viet Nam	Australia,southeast Asia,islands	0	0	2	0	0	0	0	2
7394	Psittaciformes	Cacatuidae	Cacatua	North America	Mexico	Australia,southeast Asia,islands	0	0	1	1	0	0	0	1
7395	Psittaciformes	Cacatuidae	Cacatua	North America	United States	Australia,southeast Asia,islands	0	0	2	0	0	0	0	2
8226	Psittaciformes	Cacatuidae	Nymphicus	Asia	India	-	0	0	0	0	0	0	26	26
8227	Psittaciformes	Cacatuidae	Nymphicus	Asia	Japan	-	0	0	18	0	0	0	0	18
8228	Psittaciformes	Cacatuidae	Nymphicus	Australia (Oceania)	Australia	-	0	0	0	0	0	0	41	41
8229	Psittaciformes	Cacatuidae	Nymphicus	Australia (Oceania)	Australia	-	0	0	0	0	0	0	6	6
8230	Psittaciformes	Cacatuidae	Nymphicus	Europe	United Kingdom	-	0	0	0	0	0	0	2	2
8231	Psittaciformes	Cacatuidae	Nymphicus	Europe	United Kingdom	-	0	0	0	0	0	0	6	6
8232	Psittaciformes	Cacatuidae	Nymphicus	Europe	United Kingdom	-	1	2	0	0	0	0	0	3
8233	Psittaciformes	Cacatuidae	Nymphicus	Europe	United Kingdom	-	0	0	0	0	0	0	4	4
8234	Psittaciformes	Cacatuidae	Nymphicus	North America	United States	-	0	0	0	0	1	2	2	5
8235	Psittaciformes	Cacatuidae	Nymphicus	North America	United States	-	1	1	3	0	0	0	0	5
8236	Psittaciformes	Cacatuidae	Nymphicus	North America	United States	-	1	0	0	0	0	0	0	1
8237	Psittaciformes	Cacatuidae	Nymphicus	North America	United States	-	0	0	1	0	0	0	0	1
8238	Psittaciformes	Cacatuidae	Nymphicus	North America	United States	-	0	0	0	0	0	0	20	20
8438	Psittaciformes	Cacatuidae	Nymphicus hollandicus color_mutation	Europe	Netherlands	-	14	6	2	0	0	0	0	22
8439	Psittaciformes	Cacatuidae	Nymphicus hollandicus color_mutation	Europe	Netherlands	-	0	0	0	0	0	0	10	10
8440	Psittaciformes	Cacatuidae	Nymphicus hollandicus color_mutation	Europe	Slovakia	-	0	0	0	0	0	0	4	4
874	Psittaciformes	Psittacidae	Cyanoramphus malherbi	Australia (Oceania)	New Zealand	NEW ZEALAND,SOUTH ISLAND	3	2	3	3	0	0	0	8
875	Psittaciformes	Psittacidae	Cyanoramphus malherbi	Australia (Oceania)	New Zealand	NEW ZEALAND,SOUTH ISLAND	2	1	9	0	0	0	25	37
876	Psittaciformes	Psittacidae	Cyanoramphus malherbi	Australia (Oceania)	New Zealand	NEW ZEALAND,SOUTH ISLAND	6	5	0	7	0	0	0	11
877	Psittaciformes	Psittacidae	Cyanoramphus malherbi	Australia (Oceania)	New Zealand	NEW ZEALAND,SOUTH ISLAND	5	4	0	0	0	0	0	9
1170	Psittaciformes	Psittacidae	Neophema chrysogaster	Australia (Oceania)	Australia	Australia,Tasmania	9	12	8	8	0	0	0	29
1171	Psittaciformes	Psittacidae	Neophema chrysogaster	Australia (Oceania)	Australia	Australia,Tasmania	2	0	0	0	0	0	0	2
1172	Psittaciformes	Psittacidae	Neophema chrysogaster	Australia (Oceania)	Australia	Australia,Tasmania	286	291	14	44	0	0	0	591
1173	Psittaciformes	Psittacidae	Neophema chrysogaster	Australia (Oceania)	Australia	Australia,Tasmania	2	0	0	0	0	0	0	2
1174	Psittaciformes	Psittacidae	Neophema chrysogaster	Australia (Oceania)	Australia	Australia,Tasmania	6	0	0	0	0	0	0	6
1175	Psittaciformes	Psittacidae	Neophema chrysogaster	Australia (Oceania)	Australia	Australia,Tasmania	39	44	4	22	0	0	0	87
1176	Psittaciformes	Psittacidae	Neophema chrysogaster	Australia (Oceania)	Australia	Australia,Tasmania	0	1	0	0	0	0	0	1
1177	Psittaciformes	Psittacidae	Neophema chrysogaster	Australia (Oceania)	Australia	Australia,Tasmania	40	35	51	51	0	0	0	126
1178	Psittaciformes	Psittacidae	Neophema chrysogaster	Australia (Oceania)	Australia	Australia,Tasmania	10	10	0	0	0	0	0	20
1179	Psittaciformes	Psittacidae	Neophema chrysogaster	Australia (Oceania)	Australia	Australia,Tasmania	2	23	0	0	0	0	0	25
1180	Psittaciformes	Psittacidae	Neophema chrysogaster	Australia (Oceania)	Australia	Australia,Tasmania	0	1	0	0	0	0	0	1
3300	Psittaciformes	Psittacidae	Cyanopsitta spixii	Europe	Belgium	NORTHEASTERN BRAZIL	6	20	4	0	0	0	0	30
4203	Psittaciformes	Psittacidae	Ara glaucogularis	Africa	South Africa	BOLIVIA,PARAGUAY,NORTH ARGENTINA	4	4	0	0	0	0	0	8
4204	Psittaciformes	Psittacidae	Ara glaucogularis	Asia	Cyprus	BOLIVIA,PARAGUAY,NORTH ARGENTINA	5	1	0	0	0	0	0	6
4205	Psittaciformes	Psittacidae	Ara glaucogularis	Asia	Hong Kong	BOLIVIA,PARAGUAY,NORTH ARGENTINA	1	1	0	0	0	0	0	2
4206	Psittaciformes	Psittacidae	Ara glaucogularis	Asia	Israel	BOLIVIA,PARAGUAY,NORTH ARGENTINA	1	1	0	0	0	0	0	2
4207	Psittaciformes	Psittacidae	Ara glaucogularis	Asia	Israel	BOLIVIA,PARAGUAY,NORTH ARGENTINA	1	1	0	0	0	0	0	2
4208	Psittaciformes	Psittacidae	Ara glaucogularis	Asia	Israel	BOLIVIA,PARAGUAY,NORTH ARGENTINA	1	6	0	0	0	0	0	7
4209	Psittaciformes	Psittacidae	Ara glaucogularis	Asia	Japan	BOLIVIA,PARAGUAY,NORTH ARGENTINA	1	1	0	0	0	0	0	2
4210	Psittaciformes	Psittacidae	Ara glaucogularis	Asia	Singapore	BOLIVIA,PARAGUAY,NORTH ARGENTINA	6	6	0	0	0	0	0	12
4211	Psittaciformes	Psittacidae	Ara glaucogularis	Asia	Singapore	BOLIVIA,PARAGUAY,NORTH ARGENTINA	1	2	0	0	0	0	0	3
4212	Psittaciformes	Psittacidae	Ara glaucogularis	Europe	Czech Republic	BOLIVIA,PARAGUAY,NORTH ARGENTINA	2	1	0	1	0	0	0	3
4213	Psittaciformes	Psittacidae	Ara glaucogularis	Europe	Denmark	BOLIVIA,PARAGUAY,NORTH ARGENTINA	2	0	0	0	0	0	0	2
4214	Psittaciformes	Psittacidae	Ara glaucogularis	Europe	Finland	BOLIVIA,PARAGUAY,NORTH ARGENTINA	1	1	0	0	0	0	0	2
4215	Psittaciformes	Psittacidae	Ara glaucogularis	Europe	France	BOLIVIA,PARAGUAY,NORTH ARGENTINA	1	1	0	0	0	0	0	2
4216	Psittaciformes	Psittacidae	Ara glaucogularis	Europe	France	BOLIVIA,PARAGUAY,NORTH ARGENTINA	1	2	0	0	0	0	0	3
4217	Psittaciformes	Psittacidae	Ara glaucogularis	Europe	France	BOLIVIA,PARAGUAY,NORTH ARGENTINA	0	1	0	0	0	0	0	1
4218	Psittaciformes	Psittacidae	Ara glaucogularis	Europe	France	BOLIVIA,PARAGUAY,NORTH ARGENTINA	1	1	0	0	0	0	0	2
4219	Psittaciformes	Psittacidae	Ara glaucogularis	Europe	France	BOLIVIA,PARAGUAY,NORTH ARGENTINA	3	1	0	0	0	0	0	4
4220	Psittaciformes	Psittacidae	Ara glaucogularis	Europe	France	BOLIVIA,PARAGUAY,NORTH ARGENTINA	2	2	0	2	0	0	0	4
4221	Psittaciformes	Psittacidae	Ara glaucogularis	Europe	France	BOLIVIA,PARAGUAY,NORTH ARGENTINA	1	1	0	0	0	0	0	2
4222	Psittaciformes	Psittacidae	Ara glaucogularis	Europe	Germany	BOLIVIA,PARAGUAY,NORTH ARGENTINA	4	3	0	0	0	0	0	7
4223	Psittaciformes	Psittacidae	Ara glaucogularis	Europe	Germany	BOLIVIA,PARAGUAY,NORTH ARGENTINA	1	1	0	0	0	0	0	2
4224	Psittaciformes	Psittacidae	Ara glaucogularis	Europe	Germany	BOLIVIA,PARAGUAY,NORTH ARGENTINA	1	1	0	0	0	0	0	2
4225	Psittaciformes	Psittacidae	Ara glaucogularis	Europe	Germany	BOLIVIA,PARAGUAY,NORTH ARGENTINA	1	1	0	0	0	0	0	2
4226	Psittaciformes	Psittacidae	Ara glaucogularis	Europe	Germany	BOLIVIA,PARAGUAY,NORTH ARGENTINA	4	1	0	2	0	0	0	5
4227	Psittaciformes	Psittacidae	Ara glaucogularis	Europe	Germany	BOLIVIA,PARAGUAY,NORTH ARGENTINA	1	4	2	1	0	0	0	7
4228	Psittaciformes	Psittacidae	Ara glaucogularis	Europe	Greece	BOLIVIA,PARAGUAY,NORTH ARGENTINA	1	0	0	0	0	0	0	1
4229	Psittaciformes	Psittacidae	Ara glaucogularis	Europe	Hungary	BOLIVIA,PARAGUAY,NORTH ARGENTINA	2	3	0	0	0	0	0	5
4230	Psittaciformes	Psittacidae	Ara glaucogularis	Europe	Ireland	BOLIVIA,PARAGUAY,NORTH ARGENTINA	1	1	0	0	0	0	0	2
4231	Psittaciformes	Psittacidae	Ara glaucogularis	Europe	Italy	BOLIVIA,PARAGUAY,NORTH ARGENTINA	12	20	0	5	0	0	0	32
4232	Psittaciformes	Psittacidae	Ara glaucogularis	Europe	Italy	BOLIVIA,PARAGUAY,NORTH ARGENTINA	1	1	0	0	0	0	0	2
4233	Psittaciformes	Psittacidae	Ara glaucogularis	Europe	Netherlands	BOLIVIA,PARAGUAY,NORTH ARGENTINA	6	3	1	4	0	0	0	10
4234	Psittaciformes	Psittacidae	Ara glaucogularis	Europe	Netherlands	BOLIVIA,PARAGUAY,NORTH ARGENTINA	1	0	0	0	0	0	0	1
4235	Psittaciformes	Psittacidae	Ara glaucogularis	Europe	Poland	BOLIVIA,PARAGUAY,NORTH ARGENTINA	1	1	0	0	0	0	0	2
4236	Psittaciformes	Psittacidae	Ara glaucogularis	Europe	Poland	BOLIVIA,PARAGUAY,NORTH ARGENTINA	1	0	0	0	0	0	0	1
4237	Psittaciformes	Psittacidae	Ara glaucogularis	Europe	Portugal	BOLIVIA,PARAGUAY,NORTH ARGENTINA	1	1	0	0	0	0	0	2
4238	Psittaciformes	Psittacidae	Ara glaucogularis	Europe	Portugal	BOLIVIA,PARAGUAY,NORTH ARGENTINA	0	2	0	0	0	0	0	2
4239	Psittaciformes	Psittacidae	Ara glaucogularis	Europe	Portugal	BOLIVIA,PARAGUAY,NORTH ARGENTINA	1	3	0	0	0	0	0	4
4240	Psittaciformes	Psittacidae	Ara glaucogularis	Europe	Spain	BOLIVIA,PARAGUAY,NORTH ARGENTINA	1	1	0	0	0	0	0	2
4241	Psittaciformes	Psittacidae	Ara glaucogularis	Europe	Spain	BOLIVIA,PARAGUAY,NORTH ARGENTINA	1	1	0	0	0	0	0	2
4242	Psittaciformes	Psittacidae	Ara glaucogularis	Europe	Spain	BOLIVIA,PARAGUAY,NORTH ARGENTINA	13	1	0	0	0	0	0	14
4243	Psittaciformes	Psittacidae	Ara glaucogularis	Europe	United Kingdom	BOLIVIA,PARAGUAY,NORTH ARGENTINA	1	1	0	0	0	0	0	2
4244	Psittaciformes	Psittacidae	Ara glaucogularis	Europe	United Kingdom	BOLIVIA,PARAGUAY,NORTH ARGENTINA	3	3	0	0	0	0	0	6
4245	Psittaciformes	Psittacidae	Ara glaucogularis	Europe	United Kingdom	BOLIVIA,PARAGUAY,NORTH ARGENTINA	1	1	0	0	0	0	0	2
4246	Psittaciformes	Psittacidae	Ara glaucogularis	Europe	United Kingdom	BOLIVIA,PARAGUAY,NORTH ARGENTINA	0	2	0	0	0	0	0	2
4247	Psittaciformes	Psittacidae	Ara glaucogularis	Europe	United Kingdom	BOLIVIA,PARAGUAY,NORTH ARGENTINA	1	2	0	1	0	0	0	3
4248	Psittaciformes	Psittacidae	Ara glaucogularis	Europe	United Kingdom	BOLIVIA,PARAGUAY,NORTH ARGENTINA	1	1	0	0	0	0	0	2
4249	Psittaciformes	Psittacidae	Ara glaucogularis	Europe	United Kingdom	BOLIVIA,PARAGUAY,NORTH ARGENTINA	1	1	0	0	0	0	0	2
4250	Psittaciformes	Psittacidae	Ara glaucogularis	Europe	United Kingdom	BOLIVIA,PARAGUAY,NORTH ARGENTINA	4	5	0	0	0	0	0	9
4251	Psittaciformes	Psittacidae	Ara glaucogularis	Europe	United Kingdom	BOLIVIA,PARAGUAY,NORTH ARGENTINA	2	1	0	0	0	0	0	3
4252	Psittaciformes	Psittacidae	Ara glaucogularis	Europe	United Kingdom	BOLIVIA,PARAGUAY,NORTH ARGENTINA	5	3	0	2	0	0	0	8
4253	Psittaciformes	Psittacidae	Ara glaucogularis	Europe	United Kingdom	BOLIVIA,PARAGUAY,NORTH ARGENTINA	2	1	0	0	0	0	0	3
4254	Psittaciformes	Psittacidae	Ara glaucogularis	North America	United States	BOLIVIA,PARAGUAY,NORTH ARGENTINA	1	0	0	0	0	0	0	1
4255	Psittaciformes	Psittacidae	Ara glaucogularis	North America	United States	BOLIVIA,PARAGUAY,NORTH ARGENTINA	4	0	0	0	0	0	0	4
4256	Psittaciformes	Psittacidae	Ara glaucogularis	North America	United States	BOLIVIA,PARAGUAY,NORTH ARGENTINA	1	1	0	0	0	0	0	2
4257	Psittaciformes	Psittacidae	Ara glaucogularis	North America	United States	BOLIVIA,PARAGUAY,NORTH ARGENTINA	2	2	0	0	0	0	0	4
4258	Psittaciformes	Psittacidae	Ara glaucogularis	North America	United States	BOLIVIA,PARAGUAY,NORTH ARGENTINA	0	1	0	0	0	0	0	1
4259	Psittaciformes	Psittacidae	Ara glaucogularis	North America	United States	BOLIVIA,PARAGUAY,NORTH ARGENTINA	1	3	0	0	0	0	0	4
4260	Psittaciformes	Psittacidae	Ara glaucogularis	North America	United States	BOLIVIA,PARAGUAY,NORTH ARGENTINA	0	1	0	0	0	0	0	1
4261	Psittaciformes	Psittacidae	Ara glaucogularis	North America	United States	BOLIVIA,PARAGUAY,NORTH ARGENTINA	1	1	0	0	0	0	0	2
4262	Psittaciformes	Psittacidae	Ara glaucogularis	North America	United States	BOLIVIA,PARAGUAY,NORTH ARGENTINA	1	0	0	0	0	0	0	1
[truncated: 8,009 more rows]
